# Supplementary material for: Scene: Inferring subtype-specific ceRNA modules in breast cancer
Source: Research Square preprint supplement (doi:10.21203/rs.3.rs-7181552/v1), 2025-07-23
Supplement: Supplementary file 1 [file 4a9786d7d278d3c9903f0b36.xlsx]

## Sheet: Normal
BP																				KEGG																								Reactome
Normal-ceRM1										Normal-ceRM2										Normal-ceRM1												Normal-ceRM1												Normal-ceRM1
ID	Description	GeneRatio	BgRatio	pvalue	p.adjust	qvalue	geneID	Count		ID	Description	GeneRatio	BgRatio	pvalue	p.adjust	qvalue	geneID	Count		category	subcategory	ID	Description	GeneRatio	BgRatio	pvalue	p.adjust	qvalue	geneID	Count		category	subcategory	ID	Description	GeneRatio	BgRatio	pvalue	p.adjust	qvalue	geneID	Count		ID	Description	GeneRatio	BgRatio	pvalue	p.adjust
GO:0019885	antigen processing and presentation of endogenous peptide antigen via MHC class I	10/161	23/18888	1.58795e-15	4.1779e-12	3.31631e-12	3134/3106/3135/6891/3105/3133/567/3107/6890/6892	10		GO:0003158	endothelium development	13/83	143/18888	5.1868e-14	8.56859e-11	6.92847e-11	1003/1910/1901/947/3791/5175/54538/2701/4855/64321/54567/5138/7075	13		Human Diseases	Immune disease	hsa05332	Graft-versus-host disease	10/101	44/8844	4.31279e-11	8.00928e-09	6.95543e-09	3134/3106/3811/3135/3553/355/3804/3105/3133/3107	10		/	/	/	/	/	/	/	/	/	/	/		R-HSA-198933	Immunoregulatory interactions between a Lymphoid and a non-Lymphoid cell	18/122	133/11091	4.26829e-15	2.02317e-12
GO:0002483	antigen processing and presentation of endogenous peptide antigen	10/161	25/18888	4.47127e-15	5.88196e-12	4.66895e-12	3134/3106/3135/6891/3105/3133/567/3107/6890/6892	10		GO:0045446	endothelial cell differentiation	10/83	123/18888	1.54207e-10	1.27375e-07	1.02994e-07	1003/1910/1901/3791/5175/54538/4855/64321/5138/7075	10		Organismal Systems	Immune system	hsa04612	Antigen processing and presentation	12/101	80/8844	8.00928e-11	8.00928e-09	6.95543e-09	3134/3106/3811/3135/6891/3804/3105/3133/567/3107/6890/6892	12														R-HSA-983170	Antigen Presentation: Folding, assembly and peptide loading of class I MHC	10/122	29/11091	2.9967e-13	7.10218e-11
GO:0019883	antigen processing and presentation of endogenous antigen	10/161	32/18888	8.38511e-14	7.35374e-11	5.83721e-11	3134/3106/3135/6891/3105/3133/567/3107/6890/6892	10		GO:0045765	regulation of angiogenesis	12/83	353/18888	4.43726e-08	2.24672e-05	1.81667e-05	641700/1003/358/57381/947/3791/4881/7048/187/2828/7010/7075	12		Organismal Systems	Immune system	hsa04650	Natural killer cell mediated cytotoxicity	13/101	135/8844	3.54999e-09	2.36666e-07	2.05526e-07	3384/3106/3811/3135/5777/117157/355/3804/3105/3133/3383/3107/5336	13														R-HSA-1236977	Endosomal/Vacuolar pathway	7/122	11/11091	5.21314e-12	8.23676e-10
GO:0002474	antigen processing and presentation of peptide antigen via MHC class I	10/161	37/18888	4.36531e-13	2.87128e-10	2.27915e-10	3134/3106/3135/6891/3105/3133/567/3107/6890/6892	10		GO:1901342	regulation of vasculature development	12/83	362/18888	5.84339e-08	2.24672e-05	1.81667e-05	641700/1003/358/57381/947/3791/4881/7048/187/2828/7010/7075	12		Human Diseases	Endocrine and metabolic disease	hsa04940	Type I diabetes mellitus	8/101	43/8844	2.27942e-08	1.13971e-06	9.89746e-07	3134/3106/3135/3553/355/3105/3133/3107	8														R-HSA-1236974	ER-Phagosome pathway	13/122	90/11091	1.45158e-11	1.72012e-09
GO:0002428	antigen processing and presentation of peptide antigen via MHC class Ib	8/161	18/18888	9.52137e-13	5.01014e-10	3.97692e-10	3134/3106/3135/6891/3105/3133/567/3107	8		GO:0001570	vasculogenesis	7/83	83/18888	7.75708e-08	2.24672e-05	1.81667e-05	947/3791/7048/64321/187/857/7075	7		Human Diseases	Infectious disease: viral	hsa05163	Human cytomegalovirus infection	15/101	226/8844	3.44898e-08	1.37959e-06	1.19807e-06	3134/340061/3106/3135/3553/355/6891/113/3105/3133/567/3107/6890/7852/6892	15														R-HSA-1236975	Antigen processing-Cross presentation	13/122	105/11091	1.07417e-10	1.01832e-08
GO:0019882	antigen processing and presentation	14/161	117/18888	1.30139e-12	5.70657e-10	4.52973e-10	3134/3106/3135/6891/51762/5696/3105/3133/567/3383/3107/6890/54209/6892	14		GO:0043114	regulation of vascular permeability	6/83	50/18888	8.16e-08	2.24672e-05	1.81667e-05	1003/83483/4881/2828/5138/7010	6		Human Diseases	Infectious disease: viral	hsa05170	Human immunodeficiency virus 1 infection	14/101	213/8844	1.16386e-07	3.62381e-06	3.14699e-06	3134/340061/3106/3135/355/6891/3105/3133/567/3107/6890/7852/5336/6892	14														R-HSA-877300	Interferon gamma signaling	11/122	96/11091	7.25098e-09	5.72827e-07
GO:0002475	antigen processing and presentation via MHC class Ib	8/161	25/18888	2.23735e-11	7.76822e-09	6.16622e-09	3134/3106/3135/6891/3105/3133/567/3107	8		GO:0072012	glomerulus vasculature development	5/83	30/18888	1.89589e-07	3.9959e-05	3.23104e-05	358/947/5175/2828/7010	5		Human Diseases	Immune disease	hsa05320	Autoimmune thyroid disease	8/101	53/8844	1.26833e-07	3.62381e-06	3.14699e-06	3134/3106/7253/3135/355/3105/3133/3107	8														R-HSA-2172127	DAP12 interactions	8/122	45/11091	2.60906e-08	1.76671e-06
GO:0048002	antigen processing and presentation of peptide antigen	11/161	72/18888	2.36206e-11	7.76822e-09	6.16622e-09	3134/3106/3135/6891/3105/3133/567/3107/6890/54209/6892	11		GO:0001667	ameboidal-type cell migration	13/83	498/18888	2.50157e-07	3.9959e-05	3.23104e-05	79812/161198/1003/358/1910/2324/57381/3791/7048/64321/54567/7010/56920	13		Human Diseases	Immune disease	hsa05330	Allograft rejection	7/101	38/8844	1.9396e-07	4.84899e-06	4.21097e-06	3134/3106/3135/355/3105/3133/3107	7														R-HSA-909733	Interferon alpha/beta signaling	9/122	77/11091	1.50745e-07	8.93162e-06
GO:0002476	antigen processing and presentation of endogenous peptide antigen via MHC class Ib	7/161	17/18888	5.19177e-11	1.36596e-08	1.08426e-08	3134/3106/3135/6891/3105/3133/3107	7		GO:0001935	endothelial cell proliferation	9/83	202/18888	2.54143e-07	3.9959e-05	3.23104e-05	79812/2324/947/3791/187/857/54567/7010/7075	9		Human Diseases	Infectious disease: viral	hsa05169	Epstein-Barr virus infection	13/101	203/8844	4.62583e-07	1.02796e-05	8.92704e-06	3134/3106/3135/355/6891/3105/3133/567/3383/3107/6890/5336/6892	13														R-HSA-9705671	SARS-CoV-2 activates/modulates innate and adaptive immune responses	9/122	126/11091	9.8018e-06	0.000516228
GO:0002484	antigen processing and presentation of endogenous peptide antigen via MHC class I via ER pathway	7/161	17/18888	5.19177e-11	1.36596e-08	1.08426e-08	3134/3106/3135/6891/3105/3133/3107	7		GO:0061437	renal system vasculature development	5/83	32/18888	2.66071e-07	3.9959e-05	3.23104e-05	358/947/5175/2828/7010	5		Human Diseases	Cardiovascular disease	hsa05416	Viral myocarditis	8/101	69/8844	1.02964e-06	2.05927e-05	1.78832e-05	3134/3106/3135/4624/3105/3133/3383/3107	8														R-HSA-983169	Class I MHC mediated antigen processing & presentation	15/122	381/11091	1.79409e-05	0.00081348
GO:0002699	positive regulation of immune effector process	17/161	257/18888	7.42261e-11	1.77535e-08	1.40923e-08	3134/51237/3106/3135/3553/5777/117157/2048/6891/3105/3133/7293/567/3107/3663/5336/54209	17		GO:0061440	kidney vasculature development	5/83	32/18888	2.66071e-07	3.9959e-05	3.23104e-05	358/947/5175/2828/7010	5		Human Diseases	Infectious disease: viral	hsa05166	Human T-cell leukemia virus 1 infection	11/101	223/8844	4.43121e-05	0.000805675	0.000699665	3134/3106/3135/113/3105/115650/3133/567/3383/3107/7850	11														R-HSA-6798695	Neutrophil degranulation	17/122	480/11091	1.88782e-05	0.00081348
GO:0002697	regulation of immune effector process	19/161	385/18888	7.9753e-10	1.74858e-07	1.38798e-07	3134/51237/3106/3135/3553/5777/117157/2048/6891/1379/3105/3133/7293/567/3383/3107/3663/5336/54209	19		GO:0034329	cell junction assembly	12/83	453/18888	6.49639e-07	8.68419e-05	7.02194e-05	1004/395/1003/55901/22899/3791/5175/90952/2701/187/857/7010	12		Human Diseases	Infectious disease: parasitic	hsa05143	African trypanosomiasis	5/101	37/8844	5.73542e-05	0.000955903	0.000830126	3553/355/6401/8542/3383	5														R-HSA-913531	Interferon Signaling	12/122	269/11091	3.93234e-05	0.00155327
GO:0002456	T cell mediated immunity	12/161	129/18888	1.07825e-09	2.18222e-07	1.73219e-07	3134/3106/3135/3553/6891/1379/3105/970/3133/567/3383/3107	12		GO:0032835	glomerulus development	6/83	71/18888	6.8338e-07	8.68419e-05	7.02194e-05	358/1910/947/5175/2828/7010	6		Cellular Processes	Transport and catabolism	hsa04145	Phagosome	9/101	157/8844	7.21514e-05	0.00103073	0.000895112	3134/526/3106/3135/6891/3105/3133/3107/6890	9														R-HSA-9029569	NR1H3 & NR1H2 regulate gene expression linked to cholesterol transport and efflux	5/122	37/11091	4.87818e-05	0.00177866
GO:0001916	positive regulation of T cell mediated cytotoxicity	8/161	40/18888	1.42753e-09	2.68273e-07	2.12948e-07	3134/3106/3135/6891/3105/3133/567/3107	8		GO:0001936	regulation of endothelial cell proliferation	8/83	181/18888	1.30204e-06	0.00015364	0.000124232	79812/2324/3791/187/857/54567/7010/7075	8		Environmental Information Processing	Signaling molecules and interaction	hsa04514	Cell adhesion molecules	9/101	157/8844	7.21514e-05	0.00103073	0.000895112	3134/3384/3106/3135/6401/3105/3133/3383/3107	9														R-HSA-8964058	HDL remodeling	3/122	10/11091	0.000147292	0.00496897
GO:0002486	antigen processing and presentation of endogenous peptide antigen via MHC class I via ER pathway, TAP-independent	6/161	16/18888	2.60691e-09	4.57252e-07	3.62955e-07	3134/3106/3135/3105/3133/3107	6		GO:0045766	positive regulation of angiogenesis	8/83	187/18888	1.66313e-06	0.000183166	0.000148106	1003/358/947/3791/7048/187/7010/7075	8		Human Diseases	Infectious disease: parasitic	hsa05144	Malaria	5/101	50/8844	0.000247899	0.00330532	0.00287041	2995/3553/1379/6401/3383	5														R-HSA-9024446	NR1H2 and NR1H3-mediated signaling	5/122	47/11091	0.000157246	0.00496897
GO:0002819	regulation of adaptive immune response	14/161	207/18888	2.84431e-09	4.58438e-07	3.63897e-07	3134/3106/3135/3553/5777/2048/6891/1379/113/3105/3133/567/3107/54209	14		GO:1904018	positive regulation of vasculature development	8/83	190/18888	1.87356e-06	0.000193445	0.000156417	1003/358/947/3791/7048/187/7010/7075	8		Human Diseases	Infectious disease: viral	hsa05167	Kaposi sarcoma-associated herpesvirus infection	9/101	196/8844	0.000386085	0.00458651	0.00398302	3134/3106/3135/355/3105/3133/3383/3107/5336	9														R-HSA-2424491	DAP12 signaling	4/122	30/11091	0.000306092	0.00906797
GO:0002449	lymphocyte mediated immunity	18/161	372/18888	3.12707e-09	4.58438e-07	3.63897e-07	3134/3106/3811/3135/3553/5777/117157/6891/57379/1379/3105/970/3133/567/3383/3107/202309/54209	18		GO:0002040	sprouting angiogenesis	8/83	194/18888	2.18908e-06	0.000212727	0.000172009	79812/161198/2324/57381/3791/187/54567/7010	8		Human Diseases	Infectious disease: viral	hsa05165	Human papillomavirus infection	12/101	333/8844	0.000389854	0.00458651	0.00398302	7471/3134/526/3106/3135/355/1286/1285/3105/3133/3107/256076	12														R-HSA-9705683	SARS-CoV-2-host interactions	9/122	203/11091	0.000395557	0.0110291
GO:0002703	regulation of leukocyte mediated immunity	15/161	246/18888	3.13641e-09	4.58438e-07	3.63897e-07	3134/3106/3135/3553/5777/117157/6891/1379/3105/3133/567/3383/3107/5336/54209	15		GO:0061028	establishment of endothelial barrier	5/83	49/18888	2.37632e-06	0.000218093	0.000176348	1003/1910/5175/54538/5138	5		Human Diseases	Immune disease	hsa05340	Primary immunodeficiency	4/101	38/8844	0.000877905	0.00975451	0.00847102	6891/57379/115650/6890	4														R-HSA-5668541	TNFR2 non-canonical NF-kB pathway	6/122	102/11091	0.000892208	0.0234948
GO:0045824	negative regulation of innate immune response	10/161	88/18888	3.89969e-09	5.33693e-07	4.23632e-07	3134/3106/9111/3135/6737/84166/3105/3133/10062/730249	10		GO:0003018	vascular process in circulatory system	9/83	275/18888	3.30894e-06	0.000287703	0.000232634	1003/1910/83483/4881/857/2828/53919/5138/7010	9		Human Diseases	Endocrine and metabolic disease	hsa04933	AGE-RAGE signaling pathway in diabetic complications	6/101	101/8844	0.00100932	0.0106244	0.00922644	3553/1286/1285/6401/3383/5336	6														R-HSA-5621481	C-type lectin receptors (CLRs)	7/122	143/11091	0.000997239	0.0248785
GO:0031348	negative regulation of defense response	16/161	291/18888	4.05696e-09	5.33693e-07	4.23632e-07	3134/57817/3106/9111/7114/3135/5777/6737/84166/3105/3133/348/10062/730249/54209/2358	16		GO:0098742	cell-cell adhesion via plasma-membrane adhesion molecules	9/83	279/18888	3.72229e-06	0.000307461	0.00024861	1004/51294/8404/1003/5175/54538/79633/90952/7048	9		Environmental Information Processing	Signaling molecules and interaction	hsa04060	Cytokine-cytokine receptor interaction	10/101	298/8844	0.00207286	0.0207286	0.0180011	3553/355/6368/115650/970/7293/7850/7852/6362/5008	10														R-HSA-8948216	Collagen chain trimerization	4/122	44/11091	0.00134672	0.0304446
GO:0050867	positive regulation of cell activation	18/161	380/18888	4.36589e-09	5.46983e-07	4.34181e-07	101/57817/23149/3135/3553/5777/2048/10385/3105/115650/970/3133/7293/567/283234/338339/11027/54209	18		GO:0019935	cyclic-nucleotide-mediated signaling	6/83	100/18888	5.13995e-06	0.000404343	0.000326947	358/1910/5136/4881/187/5138	6		Organismal Systems	Digestive system	hsa04979	Cholesterol metabolism	4/101	51/8844	0.00265384	0.0252746	0.021949	341/348/5360/1071	4														R-HSA-174824	Plasma lipoprotein assembly, remodeling, and clearance	5/122	75/11091	0.00138524	0.0304446
GO:0002832	negative regulation of response to biotic stimulus	11/161	119/18888	5.84458e-09	6.97199e-07	5.53419e-07	3134/3106/9111/3135/6737/84166/3105/3133/10062/11027/730249	11		GO:0007043	cell-cell junction assembly	7/83	156/18888	5.62194e-06	0.000422157	0.000341352	1004/1003/5175/90952/2701/187/857	7		Organismal Systems	Immune system	hsa04662	B cell receptor signaling pathway	5/101	91/8844	0.00376483	0.0342257	0.0297224	27071/11024/5777/11027/5336	5														R-HSA-983705	Signaling by the B Cell Receptor (BCR)	6/122	112/11091	0.00145032	0.0304446
GO:0002705	positive regulation of leukocyte mediated immunity	12/161	150/18888	6.09486e-09	6.97199e-07	5.53419e-07	3134/3106/3135/3553/117157/6891/3105/3133/567/3107/5336/54209	12		GO:0001885	endothelial cell development	5/83	64/18888	9.02388e-06	0.000629386	0.000508915	1003/1910/5175/54538/5138	5																										R-HSA-446652	Interleukin-1 family signaling	7/122	153/11091	0.00147727	0.0304446
GO:0002711	positive regulation of T cell mediated immunity	9/161	69/18888	6.94609e-09	7.29015e-07	5.78674e-07	3134/3106/3135/3553/6891/3105/3133/567/3107	9		GO:0007156	homophilic cell adhesion via plasma membrane adhesion molecules	7/83	168/18888	9.14363e-06	0.000629386	0.000508915	1004/51294/1003/5175/54538/79633/90952	7																										R-HSA-9020702	Interleukin-1 signaling	6/122	115/11091	0.00166088	0.0318144
GO:0045088	regulation of innate immune response	19/161	440/18888	7.16249e-09	7.29015e-07	5.78674e-07	101/3134/340061/3106/9111/3135/5777/117157/6737/84166/3105/3133/348/10062/11027/730249/5336/54209/2358	19		GO:0001945	lymph vessel development	4/83	31/18888	9.96389e-06	0.000658414	0.000532386	161198/2324/3791/7075	4																										R-HSA-9694516	SARS-CoV-2 Infection	10/122	299/11091	0.00167797	0.0318144
GO:0002706	regulation of lymphocyte mediated immunity	13/161	186/18888	7.20426e-09	7.29015e-07	5.78674e-07	3134/3106/3135/3553/5777/117157/6891/1379/3105/3133/567/3107/54209	13		GO:0019934	cGMP-mediated signaling	4/83	33/18888	1.28716e-05	0.000817842	0.000661298	358/1910/4881/5138	4																										R-HSA-418555	G alpha (s) signalling events	7/122	158/11091	0.0017767	0.0323907
GO:0001906	cell killing	14/161	226/18888	8.7962e-09	8.57141e-07	6.80377e-07	3134/57817/3106/3811/3135/5777/6891/1379/3105/3133/8542/567/3383/3107	14		GO:0060562	epithelial tube morphogenesis	9/83	335/18888	1.61866e-05	0.000960259	0.000776455	79812/3791/10252/7048/4855/64321/187/54567/7075	9																										R-HSA-9679506	SARS-CoV Infections	12/122	414/11091	0.00198409	0.0348317
GO:0001914	regulation of T cell mediated cytotoxicity	8/161	50/18888	9.27176e-09	8.71215e-07	6.91548e-07	3134/3106/3135/6891/3105/3133/567/3107	8		GO:0003170	heart valve development	5/83	73/18888	1.72358e-05	0.000960259	0.000776455	7048/187/54567/5138/7075	5																										R-HSA-216083	Integrin cell surface interactions	5/122	85/11091	0.00241321	0.0408522
GO:0002822	regulation of adaptive immune response based on somatic recombination of immune receptors built from immunoglobulin superfamily domains	13/161	192/18888	1.05614e-08	9.58177e-07	7.60576e-07	3134/3106/3135/3553/5777/2048/6891/1379/3105/3133/567/3107/54209	13		GO:0001894	tissue homeostasis	8/83	259/18888	1.82177e-05	0.000960259	0.000776455	58494/1003/1901/947/5175/90952/9079/5166	8																										R-HSA-9758941	Gastrulation	6/122	125/11091	0.00253366	0.0414122
GO:0050777	negative regulation of immune response	13/161	194/18888	1.19612e-08	1.049e-06	8.32666e-07	3134/3106/9111/3135/5777/6737/1379/84166/3105/3133/10062/730249/54209	13		GO:0060249	anatomical structure homeostasis	8/83	259/18888	1.82177e-05	0.000960259	0.000776455	58494/1003/1901/947/5175/90952/9079/5166	8
GO:0002708	positive regulation of lymphocyte mediated immunity	11/161	128/18888	1.26316e-08	1.07206e-06	8.50973e-07	3134/3106/3135/3553/117157/6891/3105/3133/567/3107/54209	11		GO:0001569	branching involved in blood vessel morphogenesis	4/83	36/18888	1.8344e-05	0.000960259	0.000776455	3791/7048/4855/54567	4
GO:0002696	positive regulation of leukocyte activation	17/161	362/18888	1.36998e-08	1.12638e-06	8.94092e-07	101/57817/23149/3135/3553/5777/2048/10385/3105/115650/970/3133/7293/567/283234/338339/54209	17		GO:0042060	wound healing	10/83	430/18888	1.86007e-05	0.000960259	0.000776455	375033/358/2004/7450/947/3791/4855/857/2828/22915	10
GO:0002443	leukocyte mediated immunity	19/161	469/18888	1.99964e-08	1.5803e-06	1.2544e-06	3134/3106/3811/3135/3553/5777/117157/6891/57379/1379/3105/970/3133/567/3383/3107/202309/5336/54209	19		GO:0035633	maintenance of blood-brain barrier	4/83	38/18888	2.28341e-05	0.00114309	0.00092429	58494/1003/5175/90952	4
GO:0002702	positive regulation of production of molecular mediator of immune response	11/161	134/18888	2.0422e-08	1.5803e-06	1.2544e-06	3134/51237/3135/3553/2048/3105/3133/7293/567/3663/5336	11		GO:0001709	cell fate determination	4/83	42/18888	3.41651e-05	0.00166002	0.00134228	64641/4855/64321/7148	4
GO:0050727	regulation of inflammatory response	18/161	425/18888	2.46467e-08	1.85272e-06	1.47065e-06	101/340061/57817/9111/199713/7114/3553/5777/6401/3133/348/7941/10062/730249/5008/5336/54209/2358	18		GO:0043542	endothelial cell migration	8/83	286/18888	3.69891e-05	0.00174589	0.00141171	79812/161198/1003/2324/57381/3791/54567/7010	8
GO:0002460	adaptive immune response based on somatic recombination of immune receptors built from immunoglobulin superfamily domains	17/161	385/18888	3.3781e-08	2.45437e-06	1.94821e-06	3134/3106/3135/3553/5777/2048/6891/57379/1379/3105/970/3133/567/3383/3107/202309/54209	17		GO:0010631	epithelial cell migration	9/83	375/18888	3.92225e-05	0.00179988	0.00145536	79812/161198/1003/2324/57381/3791/7048/54567/7010	9
GO:0031341	regulation of cell killing	10/161	110/18888	3.4516e-08	2.45437e-06	1.94821e-06	3134/3106/3135/6891/1379/3105/3133/567/3383/3107	10		GO:0090132	epithelium migration	9/83	378/18888	4.17252e-05	0.00183566	0.00148429	79812/161198/1003/2324/57381/3791/7048/54567/7010	9
GO:0001913	T cell mediated cytotoxicity	8/161	60/18888	4.11114e-08	2.84642e-06	2.25942e-06	3134/3106/3135/6891/3105/3133/567/3107	8		GO:0045216	cell-cell junction organization	7/83	213/18888	4.22246e-05	0.00183566	0.00148429	1004/1003/5175/90952/2701/187/857	7
GO:0001909	leukocyte mediated cytotoxicity	11/161	144/18888	4.31766e-08	2.91276e-06	2.31208e-06	3134/3106/3811/3135/5777/6891/3105/3133/567/3383/3107	11		GO:0002064	epithelial cell development	7/83	216/18888	4.61432e-05	0.00190794	0.00154274	1003/1910/3791/5175/54538/2828/5138	7
GO:0032102	negative regulation of response to external stimulus	18/161	456/18888	7.1605e-08	4.70982e-06	3.73853e-06	3134/57817/3106/9111/7114/3135/5777/6737/84166/3105/3133/79890/348/10062/11027/730249/54209/2358	18		GO:0090130	tissue migration	9/83	383/18888	4.61971e-05	0.00190794	0.00154274	79812/161198/1003/2324/57381/3791/7048/54567/7010	9
GO:0097028	dendritic cell differentiation	7/161	45/18888	9.91624e-08	6.36333e-06	5.05105e-06	3106/3135/116071/28959/55365/54209/55509	7		GO:0050673	epithelial cell proliferation	10/83	482/18888	4.90048e-05	0.00197453	0.00159659	79812/1910/2324/947/3791/187/857/54567/7010/7075	10
GO:0002824	positive regulation of adaptive immune response based on somatic recombination of immune receptors built from immunoglobulin superfamily domains	10/161	125/18888	1.17026e-07	7.33087e-06	5.81906e-06	3134/3106/3135/3553/6891/3105/3133/567/3107/54209	10		GO:0046068	cGMP metabolic process	3/83	17/18888	5.32195e-05	0.0020933	0.00169262	5136/4881/5138	3
GO:0001912	positive regulation of leukocyte mediated cytotoxicity	8/161	69/18888	1.25908e-07	7.70384e-06	6.11511e-06	3134/3106/3135/6891/3105/3133/567/3107	8		GO:0001946	lymphangiogenesis	3/83	18/18888	6.36609e-05	0.00244576	0.00197762	161198/2324/7075	3
GO:0001910	regulation of leukocyte mediated cytotoxicity	9/161	96/18888	1.30636e-07	7.81145e-06	6.20053e-06	3134/3106/3135/6891/3105/3133/567/3383/3107	9		GO:0048754	branching morphogenesis of an epithelial tube	6/83	157/18888	6.67404e-05	0.0025058	0.00202616	3791/10252/7048/4855/54567/7075	6
GO:0002709	regulation of T cell mediated immunity	9/161	99/18888	1.7066e-07	9.9779e-06	7.92021e-06	3134/3106/3135/3553/6891/3105/3133/567/3107	9		GO:0072006	nephron development	6/83	158/18888	6.91335e-05	0.00253797	0.00205217	358/1910/947/5175/2828/7010	6
GO:0002821	positive regulation of adaptive immune response	10/161	131/18888	1.8216e-07	1.04188e-05	8.27017e-06	3134/3106/3135/3553/6891/3105/3133/567/3107/54209	10		GO:0002042	cell migration involved in sprouting angiogenesis	5/83	98/18888	7.15192e-05	0.00256847	0.00207684	79812/161198/57381/3791/54567	5
GO:0031343	positive regulation of cell killing	8/161	76/18888	2.69966e-07	1.51123e-05	1.19958e-05	3134/3106/3135/6891/3105/3133/567/3107	8		GO:0050678	regulation of epithelial cell proliferation	9/83	407/18888	7.3736e-05	0.00259174	0.00209566	79812/1910/2324/3791/187/857/54567/7010/7075	9
GO:0070661	leukocyte proliferation	15/161	352/18888	3.56113e-07	1.95195e-05	1.5494e-05	51237/5699/3135/3553/5777/2048/10385/3105/115650/970/3133/7293/202309/283234/54209	15		GO:0001822	kidney development	8/83	319/18888	7.96663e-05	0.00274185	0.00221703	358/1910/947/5175/10252/64321/2828/7010	8
GO:0002228	natural killer cell mediated immunity	8/161	79/18888	3.65533e-07	1.96269e-05	1.55793e-05	3134/3106/3811/3135/5777/117157/3105/3133	8		GO:0072001	renal system development	8/83	329/18888	9.87055e-05	0.00332779	0.00269081	358/1910/947/5175/10252/64321/2828/7010	8
GO:0046651	lymphocyte proliferation	14/161	308/18888	4.11214e-07	2.16381e-05	1.71757e-05	51237/5699/3135/3553/5777/2048/10385/3105/115650/970/3133/7293/202309/283234	14		GO:0036303	lymph vessel morphogenesis	3/83	23/18888	0.000135991	0.00449316	0.00363312	161198/2324/7075	3
GO:0002720	positive regulation of cytokine production involved in immune response	8/161	81/18888	4.4421e-07	2.24922e-05	1.78537e-05	3134/3135/3553/3105/3133/567/3663/5336	8		GO:0060840	artery development	5/83	113/18888	0.000140413	0.00454829	0.0036777	7048/187/54567/5138/221395	5
GO:0002440	production of molecular mediator of immune response	14/161	310/18888	4.44544e-07	2.24922e-05	1.78537e-05	3134/51237/29802/3135/3553/2048/57379/3105/3133/7293/567/202309/3663/5336	14		GO:0048010	vascular endothelial growth factor receptor signaling pathway	4/83	61/18888	0.000149504	0.00474252	0.00383475	79812/161198/2324/3791	4
GO:0002707	negative regulation of lymphocyte mediated immunity	7/161	57/18888	5.30289e-07	2.62489e-05	2.08357e-05	3134/3106/3135/5777/1379/3105/3133	7		GO:0035162	embryonic hemopoiesis	3/83	24/18888	0.000154927	0.00474252	0.00383475	3791/7048/6886	3
GO:0032943	mononuclear cell proliferation	14/161	315/18888	5.38746e-07	2.62489e-05	2.08357e-05	51237/5699/3135/3553/5777/2048/10385/3105/115650/970/3133/7293/202309/283234	14		GO:0043534	blood vessel endothelial cell migration	6/83	183/18888	0.000155022	0.00474252	0.00383475	79812/161198/1003/57381/3791/54567	6
GO:0045953	negative regulation of natural killer cell mediated cytotoxicity	5/161	20/18888	5.91138e-07	2.82779e-05	2.24463e-05	3134/3106/3135/3105/3133	5		GO:2000351	regulation of endothelial cell apoptotic process	4/83	62/18888	0.000159283	0.00478427	0.00386851	641700/1003/3791/7010	4
GO:0002700	regulation of production of molecular mediator of immune response	11/161	187/18888	6.12373e-07	2.87706e-05	2.28374e-05	3134/51237/3135/3553/2048/3105/3133/7293/567/3663/5336	11		GO:0048771	tissue remodeling	6/83	188/18888	0.00017949	0.00525862	0.00425206	1901/2324/5166/857/54567/7075	6
GO:1903039	positive regulation of leukocyte cell-cell adhesion	13/161	277/18888	7.56955e-07	3.49395e-05	2.77341e-05	101/23149/3135/3553/5777/10385/6401/3105/115650/970/3133/567/283234	13		GO:0003007	heart morphogenesis	7/83	269/18888	0.000181441	0.00525862	0.00425206	1901/10252/7048/64321/187/54567/7010	7
GO:0002716	negative regulation of natural killer cell mediated immunity	5/161	21/18888	7.70539e-07	3.49533e-05	2.7745e-05	3134/3106/3135/3105/3133	5		GO:0061138	morphogenesis of a branching epithelium	6/83	189/18888	0.000184731	0.00526164	0.00425451	3791/10252/7048/4855/54567/7075	6
GO:0051251	positive regulation of lymphocyte activation	14/161	328/18888	8.7307e-07	3.8933e-05	3.0904e-05	101/23149/3135/3553/5777/2048/10385/3105/115650/970/3133/7293/567/283234	14		GO:0035904	aorta development	4/83	65/18888	0.000191394	0.00535902	0.00433325	7048/187/54567/5138	4
GO:0050670	regulation of lymphocyte proliferation	12/161	237/18888	9.2409e-07	4.05213e-05	3.21648e-05	51237/3135/3553/5777/2048/10385/3105/115650/970/3133/7293/283234	12		GO:0072010	glomerular epithelium development	3/83	26/18888	0.000197759	0.00544495	0.00440273	1910/947/5175	3
GO:0032944	regulation of mononuclear cell proliferation	12/161	241/18888	1.10232e-06	4.75445e-05	3.77396e-05	51237/3135/3553/5777/2048/10385/3105/115650/970/3133/7293/283234	12		GO:0050878	regulation of body fluid levels	8/83	370/18888	0.000220605	0.00597442	0.00483085	375033/358/1910/7450/4881/187/857/22915	8
GO:0001819	positive regulation of cytokine production	17/161	500/18888	1.34804e-06	5.72047e-05	4.54076e-05	23601/101/3134/340061/3135/3553/2048/3105/3133/3162/567/283234/11027/5008/3663/5336/54209	17		GO:0072577	endothelial cell apoptotic process	4/83	68/18888	0.00022793	0.00607324	0.00491076	641700/1003/3791/7010	4
GO:0002704	negative regulation of leukocyte mediated immunity	7/161	68/18888	1.7977e-06	7.50752e-05	5.95928e-05	3134/3106/3135/5777/1379/3105/3133	7		GO:0072089	stem cell proliferation	5/83	126/18888	0.000233668	0.00612728	0.00495446	947/3791/7048/2122/64321	5
GO:0050870	positive regulation of T cell activation	12/161	253/18888	1.83344e-06	7.53716e-05	5.98281e-05	101/23149/3135/3553/5777/10385/3105/115650/970/3133/567/283234	12		GO:0003014	renal system process	5/83	127/18888	0.000242413	0.00625728	0.00505957	358/1910/947/4881/221395	5
GO:0042098	T cell proliferation	11/161	213/18888	2.2013e-06	8.91018e-05	7.07268e-05	5699/3135/3553/5777/10385/3105/115650/970/3133/7293/283234	11		GO:0003094	glomerular filtration	3/83	29/18888	0.000275297	0.00699678	0.00565752	358/947/221395	3
GO:0001911	negative regulation of leukocyte mediated cytotoxicity	5/161	26/18888	2.4065e-06	9.5932e-05	7.61484e-05	3134/3106/3135/3105/3133	5		GO:0045165	cell fate commitment	7/83	289/18888	0.000280945	0.00703214	0.00568611	3791/64641/4855/64321/54567/7148/6886	7
GO:0045089	positive regulation of innate immune response	14/161	365/18888	3.06048e-06	0.000120181	9.53967e-05	101/3134/340061/9111/3135/117157/84166/3133/10062/11027/730249/5336/54209/2358	14		GO:0001763	morphogenesis of a branching structure	6/83	206/18888	0.000293888	0.0072463	0.00585928	3791/10252/7048/4855/54567/7075	6
GO:0070663	regulation of leukocyte proliferation	12/161	267/18888	3.2035e-06	0.000123947	9.8386e-05	51237/3135/3553/5777/2048/10385/3105/115650/970/3133/7293/283234	12		GO:0010632	regulation of epithelial cell migration	7/83	298/18888	0.000338135	0.00821468	0.00664231	79812/2324/57381/3791/7048/54567/7010	7
GO:2001198	regulation of dendritic cell differentiation	4/161	13/18888	3.42485e-06	0.000130591	0.00010366	3106/3135/28959/55365	4		GO:0035924	cellular response to vascular endothelial growth factor stimulus	4/83	76/18888	0.000349641	0.00837111	0.00676879	2324/3791/54567/7148	4
GO:0042267	natural killer cell mediated cytotoxicity	7/161	76/18888	3.82925e-06	0.000143925	0.000114244	3134/3106/3811/3135/5777/3105/3133	7		GO:1901888	regulation of cell junction assembly	6/83	215/18888	0.000369286	0.00849309	0.00686742	395/22899/3791/187/857/7010	6
GO:1903131	mononuclear cell differentiation	16/161	484/18888	4.01859e-06	0.000148914	0.000118204	7471/101/3106/3135/3553/5777/57379/10385/116071/28959/567/338339/55365/5336/54209/55509	16		GO:0061384	heart trabecula morphogenesis	3/83	32/18888	0.000370159	0.00849309	0.00686742	1901/54567/7010	3
GO:0031342	negative regulation of cell killing	5/161	29/18888	4.25574e-06	0.000155512	0.000123441	3134/3106/3135/3105/3133	5		GO:0097205	renal filtration	3/83	32/18888	0.000370159	0.00849309	0.00686742	358/947/221395	3
GO:0022409	positive regulation of cell-cell adhesion	13/161	325/18888	4.43931e-06	0.000159997	0.000127002	101/23149/3135/3553/5777/10385/6401/3105/115650/970/3133/567/283234	13		GO:0051056	regulation of small GTPase mediated signal transduction	7/83	304/18888	0.0003812	0.00862662	0.00697539	395/22899/80243/10252/2828/7010/9754	7
GO:0002715	regulation of natural killer cell mediated immunity	6/161	53/18888	5.75966e-06	0.000202049	0.000160381	3134/3106/3135/117157/3105/3133	6		GO:0060055	angiogenesis involved in wound healing	3/83	33/18888	0.000405888	0.00906117	0.00732676	947/3791/2828	3
GO:0071825	protein-lipid complex organization	6/161	53/18888	5.75966e-06	0.000202049	0.000160381	274/341/348/5360/7941/1071	6		GO:0007266	Rho protein signal transduction	5/83	145/18888	0.000446654	0.00983831	0.00795515	395/57381/2828/7010/9754	5
GO:0046348	amino sugar catabolic process	4/161	15/18888	6.45185e-06	0.000223353	0.000177292	216/5973/4245/1118	4		GO:0090049	regulation of cell migration involved in sprouting angiogenesis	4/83	82/18888	0.000467239	0.0101563	0.00821227	79812/57381/3791/54567	4
GO:0002833	positive regulation of response to biotic stimulus	14/161	390/18888	6.54926e-06	0.000223781	0.000177631	101/3134/340061/9111/3135/117157/84166/3133/10062/11027/730249/5336/54209/2358	14		GO:1904019	epithelial cell apoptotic process	5/83	147/18888	0.000475515	0.010202	0.0082492	641700/1003/3791/7048/7010	5
GO:0034368	protein-lipid complex remodeling	5/161	33/18888	8.27435e-06	0.000275567	0.000218738	341/348/5360/7941/1071	5		GO:2000352	negative regulation of endothelial cell apoptotic process	3/83	36/18888	0.000526146	0.0111435	0.00901051	1003/3791/7010	3
GO:0034369	plasma lipoprotein particle remodeling	5/161	33/18888	8.27435e-06	0.000275567	0.000218738	341/348/5360/7941/1071	5		GO:0048041	focal adhesion assembly	4/83	85/18888	0.000535525	0.0111986	0.00905505	395/55901/3791/7010	4
GO:0002718	regulation of cytokine production involved in immune response	8/161	120/18888	8.76467e-06	0.000288248	0.000228804	3134/3135/3553/3105/3133/567/3663/5336	8		GO:0072073	kidney epithelium development	5/83	152/18888	0.000553815	0.0114363	0.00924725	358/1910/947/5175/10252	5
GO:0002367	cytokine production involved in immune response	8/161	122/18888	9.90043e-06	0.000321581	0.000255262	3134/3135/3553/3105/3133/567/3663/5336	8		GO:0016525	negative regulation of angiogenesis	5/83	153/18888	0.000570571	0.0116368	0.00940942	641700/4881/2828/7010/7075	5
GO:0034375	high-density lipoprotein particle remodeling	4/161	17/18888	1.11006e-05	0.000356168	0.000282717	341/348/5360/1071	4		GO:0010594	regulation of endothelial cell migration	6/83	234/18888	0.000577895	0.0116425	0.00941398	79812/2324/57381/3791/54567/7010	6
GO:0097006	regulation of plasma lipoprotein particle levels	7/161	91/18888	1.27406e-05	0.000403259	0.000320097	341/348/5360/3162/7941/1071/54209	7		GO:2000181	negative regulation of blood vessel morphogenesis	5/83	155/18888	0.000605224	0.0120462	0.00974039	641700/4881/2828/7010/7075	5
GO:0034367	protein-containing complex remodeling	5/161	36/18888	1.28749e-05	0.000403259	0.000320097	341/348/5360/7941/1071	5		GO:0003180	aortic valve morphogenesis	3/83	38/18888	0.000617727	0.0121486	0.00982325	7048/54567/7075	3
GO:0002768	immune response-regulating cell surface receptor signaling pathway	13/161	360/18888	1.33016e-05	0.000411725	0.000326817	9111/23149/3135/5777/10385/3105/10062/338339/11027/730249/5336/54209/2358	13		GO:1901343	negative regulation of vasculature development	5/83	157/18888	0.000641434	0.0124665	0.0100803	641700/4881/2828/7010/7075	5
GO:0070372	regulation of ERK1 and ERK2 cascade	12/161	308/18888	1.36342e-05	0.000417113	0.000331093	3553/5777/2048/6368/10385/348/3383/8837/6362/151306/54209/2358	12		GO:0007189	adenylate cyclase-activating G protein-coupled receptor signaling pathway	5/83	158/18888	0.000660137	0.0126808	0.0102535	64123/1901/10203/2828/221395	5
GO:0007159	leukocyte cell-cell adhesion	14/161	419/18888	1.46966e-05	0.000444447	0.000352791	101/23149/3135/3553/5777/10385/6401/3105/115650/970/3133/567/3383/283234	14		GO:0007160	cell-matrix adhesion	6/83	241/18888	0.0006744	0.0128058	0.0103547	395/55901/947/3791/7010/7148	6
GO:0002237	response to molecule of bacterial origin	13/161	369/18888	1.72608e-05	0.000516058	0.000409634	199713/3553/2048/6891/57379/6401/567/10062/11027/730249/3663/5336/54209	13		GO:0060485	mesenchyme development	7/83	336/18888	0.000691083	0.0129735	0.0104902	1910/10252/7048/4855/187/56920/7148	7
GO:0032373	positive regulation of sterol transport	5/161	39/18888	1.92617e-05	0.000563084	0.000446962	348/5360/10062/1071/54209	5		GO:0052652	cyclic purine nucleotide metabolic process	3/83	40/18888	0.000718902	0.0133441	0.0107899	5136/4881/5138	3
GO:0032376	positive regulation of cholesterol transport	5/161	39/18888	1.92617e-05	0.000563084	0.000446962	348/5360/10062/1071/54209	5		GO:0001656	metanephros development	4/83	93/18888	0.000751964	0.0138027	0.0111607	358/947/10252/64321	4
GO:0002478	antigen processing and presentation of exogenous peptide antigen	5/161	41/18888	2.47286e-05	0.000701554	0.000556876	3134/6891/3105/3133/567	5		GO:0009187	cyclic nucleotide metabolic process	3/83	41/18888	0.000773209	0.0140367	0.0113499	5136/4881/5138	3
GO:1900016	negative regulation of cytokine production involved in inflammatory response	5/161	41/18888	2.47286e-05	0.000701554	0.000556876	199713/2048/113/7850/54209	5		GO:0007188	adenylate cyclase-modulating G protein-coupled receptor signaling pathway	6/83	249/18888	0.000799517	0.0143565	0.0116085	64123/1901/10203/2828/5138/221395	6
GO:1903037	regulation of leukocyte cell-cell adhesion	13/161	382/18888	2.47984e-05	0.000701554	0.000556876	101/23149/3135/3553/5777/10385/6401/3105/115650/970/3133/567/283234	13		GO:0043010	camera-type eye development	7/83	346/18888	0.000820818	0.0145767	0.0117866	358/57381/22899/3791/10252/7048/54567	7
GO:0042129	regulation of T cell proliferation	9/161	181/18888	2.55573e-05	0.000715333	0.000567813	3135/3553/5777/10385/3105/115650/970/3133/283234	9		GO:0061299	retina vasculature morphogenesis in camera-type eye	2/83	10/18888	0.000839109	0.0145767	0.0117866	57381/22899	2
GO:0070371	ERK1 and ERK2 cascade	12/161	332/18888	2.86032e-05	0.000792157	0.000628794	3553/5777/2048/6368/10385/348/3383/8837/6362/151306/54209/2358	12		GO:1903596	regulation of gap junction assembly	2/83	10/18888	0.000839109	0.0145767	0.0117866	187/857	2
GO:0050671	positive regulation of lymphocyte proliferation	8/161	143/18888	3.14172e-05	0.000861028	0.000683462	3553/2048/3105/115650/970/3133/7293/283234	8		GO:0007044	cell-substrate junction assembly	4/83	96/18888	0.000847072	0.0145767	0.0117866	395/55901/3791/7010	4
GO:0050900	leukocyte migration	13/161	396/18888	3.60042e-05	0.000976567	0.000775174	64805/101/3553/6368/6401/79890/3162/3383/7941/7852/6362/54209/2358	13		GO:0003205	cardiac chamber development	5/83	168/18888	0.000870421	0.0148241	0.0119866	7048/187/54567/5138/7010	5
GO:0032946	positive regulation of mononuclear cell proliferation	8/161	146/18888	3.64553e-05	0.000978712	0.000776877	3553/2048/3105/115650/970/3133/7293/283234	8		GO:0003176	aortic valve development	3/83	43/18888	0.000889497	0.0149944	0.0121243	7048/54567/7075	3
GO:0006869	lipid transport	14/161	456/18888	3.73128e-05	0.000991615	0.000787119	5660/341/3553/79895/8542/348/5360/2760/10062/80833/5305/1071/54209/23780	14		GO:0031589	cell-substrate adhesion	7/83	359/18888	0.00101752	0.016727	0.0135252	395/55901/7450/947/3791/7010/7148	7
GO:0033344	cholesterol efflux	6/161	74/18888	4.01081e-05	0.00105524	0.000837627	341/348/5360/10062/1071/54209	6		GO:0043951	negative regulation of cAMP-mediated signaling	2/83	11/18888	0.00102265	0.016727	0.0135252	187/5138	2
GO:0002274	myeloid leukocyte activation	10/161	241/18888	4.27786e-05	0.00111436	0.000884552	57817/9111/5777/116071/10062/338339/11027/5336/54209/55509	10		GO:1904238	pericyte cell differentiation	2/83	11/18888	0.00102265	0.016727	0.0135252	947/2828	2
GO:0002920	regulation of humoral immune response	5/161	46/18888	4.37056e-05	0.00112735	0.000894859	3553/5777/1379/730249/54209	5		GO:0061383	trabecula morphogenesis	3/83	46/18888	0.0010838	0.0174968	0.0141477	1901/54567/7010	3
GO:0050729	positive regulation of inflammatory response	8/161	153/18888	5.08858e-05	0.00129981	0.00103176	101/9111/3553/3133/7941/5008/5336/54209	8		GO:0010634	positive regulation of epithelial cell migration	5/83	177/18888	0.00109912	0.0174968	0.0141477	2324/57381/3791/7048/7010	5
GO:0002366	leukocyte activation involved in immune response	11/161	301/18888	5.62084e-05	0.00142196	0.00112872	3134/9111/5777/117157/57379/3383/202309/338339/11027/5336/54209	11		GO:0150115	cell-substrate junction organization	4/83	103/18888	0.00110149	0.0174968	0.0141477	395/55901/3791/7010	4
GO:0042269	regulation of natural killer cell mediated cytotoxicity	5/161	49/18888	5.95609e-05	0.00149243	0.00118465	3134/3106/3135/3105/3133	5		GO:0016339	calcium-dependent cell-cell adhesion via plasma membrane cell adhesion molecules	3/83	47/18888	0.00115405	0.0176276	0.0142535	1004/51294/1003	3
GO:0002534	cytokine production involved in inflammatory response	6/161	80/18888	6.23821e-05	0.0015339	0.00121757	122618/199713/2048/113/7850/54209	6		GO:1905314	semi-lunar valve development	3/83	47/18888	0.00115405	0.0176276	0.0142535	7048/54567/7075	3
GO:1900015	regulation of cytokine production involved in inflammatory response	6/161	80/18888	6.23821e-05	0.0015339	0.00121757	122618/199713/2048/113/7850/54209	6		GO:0048762	mesenchymal cell differentiation	6/83	269/18888	0.00119117	0.0176276	0.0142535	1910/10252/7048/4855/56920/7148	6
GO:0002263	cell activation involved in immune response	11/161	305/18888	6.32818e-05	0.00154161	0.00122369	3134/9111/5777/117157/57379/3383/202309/338339/11027/5336/54209	11		GO:0003157	endocardium development	2/83	12/18888	0.00122368	0.0176276	0.0142535	3791/64321	2
GO:0019884	antigen processing and presentation of exogenous antigen	5/161	50/18888	6.57264e-05	0.00157206	0.00124786	3134/6891/3105/3133/567	5		GO:0010752	regulation of cGMP-mediated signaling	2/83	12/18888	0.00122368	0.0176276	0.0142535	4881/5138	2
GO:0071827	plasma lipoprotein particle organization	5/161	50/18888	6.57264e-05	0.00157206	0.00124786	341/348/5360/7941/1071	5		GO:0035812	renal sodium excretion	2/83	12/18888	0.00122368	0.0176276	0.0142535	1910/4881	2
GO:0045785	positive regulation of cell adhesion	14/161	485/18888	7.24071e-05	0.00171624	0.00136231	64805/101/23149/3135/3553/5777/10385/6401/3105/115650/970/3133/567/283234	14		GO:0042045	epithelial fluid transport	2/83	12/18888	0.00122368	0.0176276	0.0142535	358/1910	2
GO:0007249	canonical NF-kappaB signal transduction	11/161	311/18888	7.53202e-05	0.00175538	0.00139338	101/6275/7114/3553/6737/3162/338339/80833/8837/5336/54209	11		GO:2001214	positive regulation of vasculogenesis	2/83	12/18888	0.00122368	0.0176276	0.0142535	947/3791	2
GO:0010875	positive regulation of cholesterol efflux	4/161	27/18888	7.65928e-05	0.00175538	0.00139338	348/5360/10062/54209	4		GO:0035850	epithelial cell differentiation involved in kidney development	3/83	48/18888	0.0012271	0.0176276	0.0142535	1910/947/2828	3
GO:0032371	regulation of sterol transport	6/161	83/18888	7.6727e-05	0.00175538	0.00139338	341/348/5360/10062/1071/54209	6		GO:0044331	cell-cell adhesion mediated by cadherin	3/83	48/18888	0.0012271	0.0176276	0.0142535	1004/1003/4855	3
GO:0032374	regulation of cholesterol transport	6/161	83/18888	7.6727e-05	0.00175538	0.00139338	341/348/5360/10062/1071/54209	6		GO:1903587	regulation of blood vessel endothelial cell proliferation involved in sprouting angiogenesis	3/83	48/18888	0.0012271	0.0176276	0.0142535	79812/187/54567	3
GO:0002698	negative regulation of immune effector process	7/161	121/18888	8.02998e-05	0.00182128	0.00144569	3134/3106/3135/5777/1379/3105/3133	7		GO:0035810	positive regulation of urine volume	2/83	13/18888	0.00144205	0.0205158	0.0165888	1910/4881	2
GO:0070665	positive regulation of leukocyte proliferation	8/161	164/18888	8.29966e-05	0.00186636	0.00148147	3553/2048/3105/115650/970/3133/7293/283234	8		GO:0001938	positive regulation of endothelial cell proliferation	4/83	111/18888	0.00145299	0.0205158	0.0165888	2324/3791/187/7010	4
GO:0002675	positive regulation of acute inflammatory response	4/161	28/18888	8.87672e-05	0.00197921	0.00157104	101/3553/3133/5008	4		GO:0007264	small GTPase-mediated signal transduction	8/83	500/18888	0.00158154	0.0221416	0.0179035	395/57381/22899/80243/10252/2828/7010/9754	8
GO:0022407	regulation of cell-cell adhesion	14/161	496/18888	9.18326e-05	0.00203035	0.00161164	7471/101/23149/3135/3553/5777/10385/6401/3105/115650/970/3133/567/283234	14		GO:0038084	vascular endothelial growth factor signaling pathway	3/83	53/18888	0.00163599	0.0227113	0.0183641	2324/3791/7148	3
GO:0010874	regulation of cholesterol efflux	5/161	54/18888	9.54506e-05	0.00209275	0.00166118	348/5360/10062/1071/54209	5		GO:1904035	regulation of epithelial cell apoptotic process	4/83	115/18888	0.00165515	0.0227859	0.0184245	641700/1003/3791/7010	4
GO:0032370	positive regulation of lipid transport	6/161	87/18888	9.98177e-05	0.00217042	0.00172282	3553/348/5360/10062/1071/54209	6		GO:0009214	cyclic nucleotide catabolic process	2/83	14/18888	0.0016776	0.0229041	0.01852	5136/5138	2
GO:0050863	regulation of T cell activation	12/161	382/18888	0.000109771	0.00236726	0.00187907	101/23149/3135/3553/5777/10385/3105/115650/970/3133/567/283234	12		GO:0001654	eye development	7/83	393/18888	0.00171041	0.0231607	0.0187275	358/57381/22899/3791/10252/7048/54567	7
GO:0002507	tolerance induction	4/161	30/18888	0.000117246	0.00250791	0.00199072	3106/3135/3133/730249	4		GO:0150063	visual system development	7/83	397/18888	0.0018115	0.0240615	0.0194559	358/57381/22899/3791/10252/7048/54567	7
GO:0002429	immune response-activating cell surface receptor signaling pathway	11/161	332/18888	0.000134161	0.0028466	0.00225956	9111/23149/5777/10385/3105/10062/11027/730249/5336/54209/2358	11		GO:0002043	blood vessel endothelial cell proliferation involved in sprouting angiogenesis	3/83	55/18888	0.00182064	0.0240615	0.0194559	79812/187/54567	3
GO:0030301	cholesterol transport	7/161	132/18888	0.000138624	0.00291777	0.00231605	341/348/5360/10062/5305/1071/54209	7		GO:0030857	negative regulation of epithelial cell differentiation	3/83	55/18888	0.00182064	0.0240615	0.0194559	10252/4855/857	3
GO:0002685	regulation of leukocyte migration	9/161	230/18888	0.000161891	0.00338043	0.0026833	64805/101/6401/79890/3162/3383/7941/54209/2358	9		GO:0007369	gastrulation	5/83	200/18888	0.00188428	0.024705	0.0199762	7048/64321/187/83595/6886	5
GO:0043122	regulation of canonical NF-kappaB signal transduction	10/161	286/18888	0.000176198	0.00365021	0.00289744	6275/7114/3553/6737/3162/338339/80833/8837/5336/54209	10		GO:0043252	sodium-independent organic anion transport	2/83	15/18888	0.00193018	0.0251075	0.0203017	6578/53919	2
GO:0070555	response to interleukin-1	7/161	138/18888	0.000182643	0.00375417	0.00297997	199713/3553/6368/6401/7850/730249/6362	7		GO:0048880	sensory system development	7/83	403/18888	0.00197178	0.0254483	0.0205773	358/57381/22899/3791/10252/7048/54567	7
GO:0006935	chemotaxis	13/161	466/18888	0.000184534	0.00376364	0.00298748	64805/101/6036/6275/7114/3553/6368/79890/7941/7852/6362/54209/2358	13		GO:0072009	nephron epithelium development	4/83	121/18888	0.00199389	0.0255342	0.0206467	358/1910/947/5175	4
GO:0042330	taxis	13/161	468/18888	0.000192407	0.00388055	0.00308028	64805/101/6036/6275/7114/3553/6368/79890/7941/7852/6362/54209/2358	13		GO:0061005	cell differentiation involved in kidney development	3/83	58/18888	0.00212116	0.0269551	0.0217956	1910/947/2828	3
GO:0002717	positive regulation of natural killer cell mediated immunity	4/161	34/18888	0.000193216	0.00388055	0.00308028	3134/3135/117157/3133	4		GO:2001212	regulation of vasculogenesis	2/83	16/18888	0.00219964	0.0277389	0.0224294	947/3791	2
GO:0030100	regulation of endocytosis	10/161	291/18888	0.000202642	0.00403903	0.00320608	274/341/6401/79890/348/567/10062/5336/54209/2358	10		GO:0003206	cardiac chamber morphogenesis	4/83	127/18888	0.00237785	0.0295354	0.023882	7048/187/54567/7010	4
GO:0009615	response to virus	12/161	409/18888	0.000206956	0.00409399	0.0032497	340061/6036/9111/3553/6737/57379/84166/64108/730249/7852/3663/55509	12		GO:0003231	cardiac ventricle development	4/83	127/18888	0.00237785	0.0295354	0.023882	7048/187/54567/5138	4
GO:0071219	cellular response to molecule of bacterial origin	9/161	238/18888	0.000209003	0.00410363	0.00325736	199713/3553/2048/57379/10062/11027/730249/5336/54209	9		GO:0003179	heart valve morphogenesis	3/83	61/18888	0.00245082	0.0297579	0.0240619	7048/54567/7075	3
GO:0034142	toll-like receptor 4 signaling pathway	5/161	64/18888	0.00021489	0.00414087	0.00328692	9111/10062/11027/730249/54209	5		GO:0038083	peptidyl-tyrosine autophosphorylation	2/83	17/18888	0.00248583	0.0297579	0.0240619	3791/857	2
GO:0002220	innate immune response activating cell surface receptor signaling pathway	6/161	100/18888	0.000215154	0.00414087	0.00328692	9111/10062/11027/730249/5336/54209	6		GO:0043129	surfactant homeostasis	2/83	17/18888	0.00248583	0.0297579	0.0240619	3791/221395	2
GO:0097529	myeloid leukocyte migration	9/161	239/18888	0.000215621	0.00414087	0.00328692	64805/101/3553/6368/79890/7941/6362/54209/2358	9		GO:0072109	glomerular mesangium development	2/83	17/18888	0.00248583	0.0297579	0.0240619	947/2828	2
GO:0034143	regulation of toll-like receptor 4 signaling pathway	4/161	36/18888	0.000242186	0.00461733	0.00366512	10062/11027/730249/54209	4		GO:0072224	metanephric glomerulus development	2/83	17/18888	0.00248583	0.0297579	0.0240619	358/947	2
GO:0015918	sterol transport	7/161	145/18888	0.000247613	0.00468684	0.00372029	341/348/5360/10062/5305/1071/54209	7		GO:0010595	positive regulation of endothelial cell migration	4/83	131/18888	0.00266039	0.0314844	0.025458	2324/57381/3791/7010	4
GO:0042100	B cell proliferation	6/161	104/18888	0.000266327	0.00496955	0.0039447	51237/2048/115650/970/7293/202309	6		GO:0051893	regulation of focal adhesion assembly	3/83	63/18888	0.00268723	0.0314844	0.025458	395/3791/7010	3
GO:0042102	positive regulation of T cell proliferation	6/161	104/18888	0.000266327	0.00496955	0.0039447	3553/3105/115650/970/3133/283234	6		GO:0090109	regulation of cell-substrate junction assembly	3/83	63/18888	0.00268723	0.0314844	0.025458	395/3791/7010	3
GO:0002687	positive regulation of leukocyte migration	7/161	149/18888	0.000292373	0.00541714	0.00429999	64805/101/6401/3383/7941/54209/2358	7		GO:0016264	gap junction assembly	2/83	18/18888	0.0027886	0.0322151	0.0260488	187/857	2
GO:0002532	production of molecular mediator involved in inflammatory response	6/161	106/18888	0.000295264	0.00543245	0.00431214	122618/199713/2048/113/7850/54209	6		GO:2000811	negative regulation of anoikis	2/83	18/18888	0.0027886	0.0322151	0.0260488	5166/857	2
GO:0002369	T cell cytokine production	4/161	38/18888	0.000299496	0.00543431	0.00431361	3134/3553/3105/567	4		GO:1904036	negative regulation of epithelial cell apoptotic process	3/83	65/18888	0.00293726	0.0336969	0.0272469	1003/3791/7010	3
GO:0002724	regulation of T cell cytokine production	4/161	38/18888	0.000299496	0.00543431	0.00431361	3134/3553/3105/567	4		GO:0001947	heart looping	3/83	66/18888	0.00306746	0.0349478	0.0282585	7048/64321/187	3
GO:0034374	low-density lipoprotein particle remodeling	3/161	16/18888	0.000313751	0.00561551	0.00445745	348/7941/1071	3		GO:0061298	retina vasculature development in camera-type eye	2/83	19/18888	0.0031078	0.035165	0.028434	57381/22899	2
GO:0051044	positive regulation of membrane protein ectodomain proteolysis	3/161	16/18888	0.000313751	0.00561551	0.00445745	101/3553/348	3		GO:0007163	establishment or maintenance of cell polarity	5/83	226/18888	0.00319627	0.03592	0.0290446	1003/358/57381/10252/7010	5
GO:0050728	negative regulation of inflammatory response	8/161	201/18888	0.000334857	0.00595277	0.00472516	57817/7114/5777/348/10062/730249/54209/2358	8		GO:0150116	regulation of cell-substrate junction organization	3/83	68/18888	0.00333838	0.0372635	0.0301309	395/3791/7010	3
GO:0071347	cellular response to interleukin-1	6/161	110/18888	0.000360513	0.00636583	0.00505304	199713/3553/6368/7850/730249/6362	6		GO:0060216	definitive hemopoiesis	2/83	20/18888	0.00344329	0.037671	0.0304604	7010/6886	2
GO:0045807	positive regulation of endocytosis	7/161	155/18888	0.00037149	0.00650514	0.00516362	274/6401/348/567/5336/54209/2358	7		GO:0060353	regulation of cell adhesion molecule production	2/83	20/18888	0.00344329	0.037671	0.0304604	4855/857	2
GO:0140895	cell surface toll-like receptor signaling pathway	5/161	72/18888	0.000373347	0.00650514	0.00516362	9111/10062/11027/730249/54209	5		GO:0097254	renal tubular secretion	2/83	20/18888	0.00344329	0.037671	0.0304604	1910/4881	2
GO:0032368	regulation of lipid transport	7/161	156/18888	0.0003862	0.00668482	0.00530624	341/3553/348/5360/10062/1071/54209	7		GO:0048645	animal organ formation	3/83	69/18888	0.00347916	0.037813	0.0305752	10252/7048/64321	3
GO:1905954	positive regulation of lipid localization	6/161	112/18888	0.000397106	0.00682867	0.00542042	3553/348/5360/10062/1071/54209	6		GO:0019933	cAMP-mediated signaling	3/83	71/18888	0.00377152	0.0401873	0.032495	5136/187/5138	3
GO:0034612	response to tumor necrosis factor	9/161	263/18888	0.000435236	0.00743576	0.00590232	7114/355/6368/6401/115650/970/7293/730249/6362	9		GO:0061371	determination of heart left/right asymmetry	3/83	71/18888	0.00377152	0.0401873	0.032495	7048/64321/187	3
GO:0006040	amino sugar metabolic process	4/161	42/18888	0.000442283	0.0075074	0.00595919	216/5973/4245/1118	4		GO:0070830	bicellular tight junction assembly	3/83	71/18888	0.00377152	0.0401873	0.032495	1003/5175/90952	3
GO:0002923	regulation of humoral immune response mediated by circulating immunoglobulin	3/161	18/18888	0.00045149	0.00756606	0.00600575	5777/1379/54209	3		GO:0035809	regulation of urine volume	2/83	21/18888	0.00379493	0.0401873	0.032495	1910/4881	2
GO:0150078	positive regulation of neuroinflammatory response	3/161	18/18888	0.00045149	0.00756606	0.00600575	3553/5336/54209	3		GO:0021700	developmental maturation	6/83	341/18888	0.00389832	0.0410192	0.0331677	1003/1910/1901/22899/3791/6886	6
GO:0071216	cellular response to biotic stimulus	9/161	265/18888	0.000459771	0.00765606	0.00607718	199713/3553/2048/57379/10062/11027/730249/5336/54209	9		GO:0003143	embryonic heart tube morphogenesis	3/83	72/18888	0.00392314	0.0410192	0.0331677	7048/64321/187	3
GO:0019724	B cell mediated immunity	8/161	212/18888	0.000477581	0.00790261	0.00627289	3135/5777/57379/1379/970/3133/202309/54209	8		GO:0140962	multicellular organismal-level chemical homeostasis	3/83	73/18888	0.00407844	0.0423747	0.0342637	358/3791/221395	3
GO:1904646	cellular response to amyloid-beta	4/161	43/18888	0.000484432	0.00796589	0.00632312	2048/3383/54209/2358	4		GO:0150105	protein localization to cell-cell junction	2/83	22/18888	0.00416255	0.0429784	0.0347519	1003/5175	2
GO:0070374	positive regulation of ERK1 and ERK2 cascade	8/161	215/18888	0.000524057	0.00856394	0.00679784	6368/348/3383/8837/6362/151306/54209/2358	8		GO:0003281	ventricular septum development	3/83	74/18888	0.00423743	0.0434797	0.0351572	7048/187/5138	3
GO:0002281	macrophage activation involved in immune response	3/161	19/18888	0.0005328	0.00865307	0.00686858	9111/5336/54209	3		GO:0045123	cellular extravasation	3/83	75/18888	0.00440014	0.0448705	0.0362818	58494/5175/83483	3
GO:0002752	cell surface pattern recognition receptor signaling pathway	5/161	79/18888	0.000573315	0.00925394	0.00734554	9111/10062/11027/730249/54209	5		GO:0060352	cell adhesion molecule production	2/83	23/18888	0.00454604	0.0460739	0.0372549	4855/857	2
GO:0007193	adenylate cyclase-inhibiting G protein-coupled receptor signaling pathway	5/161	80/18888	0.000607377	0.00974396	0.00773451	64805/5660/113/3640/2358	5		GO:0001937	negative regulation of endothelial cell proliferation	3/83	77/18888	0.00473683	0.0471555	0.0381295	79812/857/54567	3
GO:0034144	negative regulation of toll-like receptor 4 signaling pathway	3/161	20/18888	0.000622914	0.00993265	0.00788429	11027/730249/54209	3		GO:0120192	tight junction assembly	3/83	77/18888	0.00473683	0.0471555	0.0381295	1003/5175/90952	3
GO:0051235	maintenance of location	10/161	337/18888	0.000643861	0.0101562	0.00806172	2512/7114/3553/5777/126306/348/2760/10062/5336/54209	10		GO:0048863	stem cell differentiation	5/83	248/18888	0.00473839	0.0471555	0.0381295	1910/7048/64321/56920/6886	5
GO:0043409	negative regulation of MAPK cascade	7/161	170/18888	0.0006457	0.0101562	0.00806172	1844/3553/5777/2048/10385/348/54209	7		GO:0008037	cell recognition	4/83	155/18888	0.0048516	0.0476667	0.0385428	51294/375033/5175/54538	4
GO:0042113	B cell activation	9/161	278/18888	0.000648514	0.0101562	0.00806172	51237/5777/2048/57379/115650/970/7293/202309/5336	9		GO:0051145	smooth muscle cell differentiation	3/83	78/18888	0.00491085	0.0476667	0.0385428	1910/4855/187	3
GO:0032479	regulation of type I interferon production	6/161	124/18888	0.000681729	0.0105508	0.00837492	340061/9111/6737/730249/3663/5336	6		GO:0061042	vascular wound healing	2/83	24/18888	0.00494523	0.0476667	0.0385428	947/3791	2
GO:0032606	type I interferon production	6/161	124/18888	0.000681729	0.0105508	0.00837492	340061/9111/6737/730249/3663/5336	6		GO:0061484	hematopoietic stem cell homeostasis	2/83	24/18888	0.00494523	0.0476667	0.0385428	51705/80177	2
GO:0071222	cellular response to lipopolysaccharide	8/161	225/18888	0.000706139	0.0108646	0.00862407	199713/3553/2048/57379/10062/11027/730249/5336	8		GO:2000209	regulation of anoikis	2/83	24/18888	0.00494523	0.0476667	0.0385428	5166/857	2
GO:0043269	regulation of monoatomic ion transport	12/161	470/18888	0.000718549	0.0109202	0.00866819	64805/57817/246329/274/7114/5777/2048/126306/567/11027/7852/54209	12		GO:0043535	regulation of blood vessel endothelial cell migration	4/83	156/18888	0.00496288	0.0476667	0.0385428	79812/57381/3791/54567	4
GO:0002396	MHC protein complex assembly	3/161	21/18888	0.000722203	0.0109202	0.00866819	3105/567/6892	3		GO:0043297	apical junction assembly	3/83	79/18888	0.0050887	0.0485927	0.0392915	1003/5175/90952	3
GO:0002501	peptide antigen assembly with MHC protein complex	3/161	21/18888	0.000722203	0.0109202	0.00866819	3105/567/6892	3
GO:0002673	regulation of acute inflammatory response	4/161	48/18888	0.000738985	0.0111101	0.00881893	101/3553/3133/5008	4
GO:0043410	positive regulation of MAPK cascade	12/161	475/18888	0.000787837	0.0117773	0.00934849	101/3553/6368/348/3383/8837/6362/5008/151306/5336/54209/2358	12
GO:0001959	regulation of cytokine-mediated signaling pathway	7/161	177/18888	0.000819219	0.0121703	0.0096605	340061/5777/84166/10062/7850/7852/54209	7
GO:0032496	response to lipopolysaccharide	10/161	348/18888	0.000823382	0.0121703	0.0096605	199713/3553/2048/57379/6401/10062/11027/730249/5336/54209	10
GO:0030449	regulation of complement activation	3/161	22/18888	0.000831024	0.0122147	0.00969569	3553/1379/54209	3
GO:0030595	leukocyte chemotaxis	8/161	237/18888	0.000988619	0.0144503	0.0114703	101/3553/6368/79890/7941/7852/6362/2358	8
GO:0002639	positive regulation of immunoglobulin production	4/161	53/18888	0.00107602	0.0155929	0.0123772	51237/2048/3133/7293	4
GO:0002922	positive regulation of humoral immune response	3/161	24/18888	0.00107864	0.0155929	0.0123772	3553/730249/54209	3
GO:1905952	regulation of lipid localization	7/161	186/18888	0.00109431	0.015733	0.0124884	341/3553/348/5360/10062/1071/54209	7
GO:0071356	cellular response to tumor necrosis factor	8/161	241/18888	0.00110068	0.0157385	0.0124928	7114/355/6368/115650/970/7293/730249/6362	8
GO:0032411	positive regulation of transporter activity	5/161	92/18888	0.0011449	0.0162427	0.0128931	246329/7114/2048/10062/54209	5
GO:0032092	positive regulation of protein binding	4/161	54/18888	0.00115446	0.0162427	0.0128931	340061/6737/348/567	4
GO:1904645	response to amyloid-beta	4/161	54/18888	0.00115446	0.0162427	0.0128931	2048/3383/54209/2358	4
GO:0060759	regulation of response to cytokine stimulus	7/161	189/18888	0.00120057	0.0168016	0.0133367	340061/5777/84166/10062/7850/7852/54209	7
GO:0009110	vitamin biosynthetic process	3/161	25/18888	0.0012181	0.0168588	0.0133821	27010/231/5360	3
GO:0060586	multicellular organismal-level iron ion homeostasis	3/161	25/18888	0.0012181	0.0168588	0.0133821	57817/3162/567	3
GO:0002757	immune response-activating signaling pathway	12/161	500/18888	0.00122388	0.0168588	0.0133821	340061/9111/23149/5777/10385/3105/10062/11027/730249/5336/54209/2358	12
GO:0034381	plasma lipoprotein particle clearance	4/161	55/18888	0.00123683	0.0168606	0.0133835	341/348/3162/54209	4
GO:2000772	regulation of cellular senescence	4/161	55/18888	0.00123683	0.0168606	0.0133835	7471/3135/22846/567	4
GO:0019915	lipid storage	5/161	94/18888	0.00126064	0.0170967	0.0135709	3553/348/2760/10062/54209	5
GO:0051607	defense response to virus	9/161	307/18888	0.00130213	0.0175687	0.0139456	340061/6036/3553/6737/57379/84166/64108/730249/3663	9
GO:0002823	negative regulation of adaptive immune response based on somatic recombination of immune receptors built from immunoglobulin superfamily domains	4/161	56/18888	0.00132322	0.0177622	0.0140992	3134/3135/5777/1379	4
GO:0002726	positive regulation of T cell cytokine production	3/161	26/18888	0.00136842	0.0179978	0.0142862	3553/3105/567	3
GO:0098581	detection of external biotic stimulus	3/161	26/18888	0.00136842	0.0179978	0.0142862	3106/3105/54209	3
GO:0034341	response to type II interferon	6/161	142/18888	0.00137809	0.0179978	0.0142862	6737/6368/84166/10062/730249/6362	6
GO:0050921	positive regulation of chemotaxis	6/161	142/18888	0.00137809	0.0179978	0.0142862	64805/7114/7941/7852/54209/2358	6
GO:0006066	alcohol metabolic process	10/161	373/18888	0.00138761	0.0179978	0.0142862	216/341/27010/8542/10170/348/231/5336/1071/23780	10
GO:0002377	immunoglobulin production	7/161	194/18888	0.00139549	0.0179978	0.0142862	51237/29802/2048/57379/3133/7293/202309	7
GO:0071706	tumor necrosis factor superfamily cytokine production	7/161	194/18888	0.00139549	0.0179978	0.0142862	101/5777/2048/3133/11027/5336/54209	7
GO:1903555	regulation of tumor necrosis factor superfamily cytokine production	7/161	194/18888	0.00139549	0.0179978	0.0142862	101/5777/2048/3133/11027/5336/54209	7
GO:0002275	myeloid cell activation involved in immune response	5/161	97/18888	0.00145018	0.0186118	0.0147736	9111/5777/11027/5336/54209	5
GO:1901653	cellular response to peptide	10/161	376/18888	0.00147256	0.0188073	0.0149288	7471/51237/7253/3553/2048/3383/5305/8837/54209/2358	10
GO:0051043	regulation of membrane protein ectodomain proteolysis	3/161	27/18888	0.00152989	0.0194452	0.0154351	101/3553/348	3
GO:0001818	negative regulation of cytokine production	10/161	381/18888	0.00162352	0.0204378	0.016223	3134/9111/199713/5777/2048/10385/113/7850/730249/54209	10
GO:0051090	regulation of DNA-binding transcription factor activity	10/161	381/18888	0.00162352	0.0204378	0.016223	7471/340061/3553/6737/84166/57413/7293/730249/8837/5336	10
GO:0006959	humoral immune response	8/161	258/18888	0.0016954	0.0212329	0.0168541	5699/3553/5777/1379/3105/3133/730249/54209	8
GO:0001773	myeloid dendritic cell activation	3/161	28/18888	0.00170283	0.0212329	0.0168541	116071/338339/55509	3
GO:0001961	positive regulation of cytokine-mediated signaling pathway	4/161	60/18888	0.00171112	0.0212356	0.0168563	340061/84166/7852/54209	4
GO:0060326	cell chemotaxis	9/161	322/18888	0.0018062	0.0223104	0.0177094	101/7114/3553/6368/79890/7941/7852/6362/2358	9
GO:0002820	negative regulation of adaptive immune response	4/161	61/18888	0.00181918	0.0223658	0.0177534	3134/3135/5777/1379	4
GO:0015914	phospholipid transport	5/161	103/18888	0.00189114	0.0231423	0.0183698	341/79895/348/5360/1071	5
GO:0002712	regulation of B cell mediated immunity	4/161	62/18888	0.00193189	0.0234231	0.0185927	5777/1379/3133/54209	4
GO:0002889	regulation of immunoglobulin mediated immune response	4/161	62/18888	0.00193189	0.0234231	0.0185927	5777/1379/3133/54209	4
GO:0071674	mononuclear cell migration	7/161	206/18888	0.00196457	0.02371	0.0188204	101/6368/3383/7941/7852/6362/2358	7
GO:0032615	interleukin-12 production	4/161	63/18888	0.00204935	0.0245083	0.0194541	3106/3135/3663/5336	4
GO:0032655	regulation of interleukin-12 production	4/161	63/18888	0.00204935	0.0245083	0.0194541	3106/3135/3663/5336	4
GO:0043123	positive regulation of canonical NF-kappaB signal transduction	7/161	208/18888	0.00207472	0.0245899	0.0195188	6275/3553/6737/3162/338339/80833/8837	7
GO:0015748	organophosphate ester transport	6/161	154/18888	0.00208046	0.0245899	0.0195188	341/219855/79895/348/5360/1071	6
GO:0065005	protein-lipid complex assembly	3/161	30/18888	0.0020842	0.0245899	0.0195188	274/341/348	3
GO:0030888	regulation of B cell proliferation	4/161	64/18888	0.00217164	0.0255071	0.0202469	51237/2048/115650/7293	4
GO:0072677	eosinophil migration	3/161	31/18888	0.00229318	0.0266963	0.0211908	101/6368/6362	3
GO:1902042	negative regulation of extrinsic apoptotic signaling pathway via death domain receptors	3/161	31/18888	0.00229318	0.0266963	0.0211908	3162/3383/8837	3
GO:0002526	acute inflammatory response	5/161	109/18888	0.00242307	0.0280841	0.0222925	101/3553/3133/5008/23780	5
GO:0050866	negative regulation of cell activation	7/161	215/18888	0.00249834	0.0288295	0.0228842	3135/5777/10385/3133/348/10062/54209	7
GO:0042116	macrophage activation	5/161	110/18888	0.00252129	0.0289673	0.0229935	57817/9111/10062/5336/54209	5
GO:0060760	positive regulation of response to cytokine stimulus	4/161	67/18888	0.0025686	0.0293825	0.0233231	340061/84166/7852/54209	4
GO:1903557	positive regulation of tumor necrosis factor superfamily cytokine production	5/161	113/18888	0.00283328	0.03227	0.0256151	101/2048/3133/11027/5336	5
GO:0060191	regulation of lipase activity	4/161	69/18888	0.00285928	0.0324257	0.0257387	341/6401/115727/10062	4
GO:0002548	monocyte chemotaxis	4/161	70/18888	0.00301273	0.0340193	0.0270036	6368/7941/6362/2358	4
GO:0048259	regulation of receptor-mediated endocytosis	5/161	115/18888	0.00305622	0.0343629	0.0272764	341/6401/79890/567/5336	5
GO:2000822	regulation of behavioral fear response	2/161	10/18888	0.00310671	0.0347819	0.027609	2048/348	2
GO:0033209	tumor necrosis factor-mediated signaling pathway	5/161	117/18888	0.00329155	0.0366952	0.0291277	7114/355/115650/970/7293	5
GO:0010721	negative regulation of cell development	8/161	288/18888	0.00334049	0.0370837	0.0294361	3135/3553/2048/28959/567/393/55365/54209	8
GO:0051651	maintenance of location in cell	7/161	228/18888	0.00345866	0.0381755	0.0303028	2512/7114/5777/126306/348/2760/5336	7
GO:0006879	intracellular iron ion homeostasis	4/161	73/18888	0.00350665	0.0381755	0.0303028	57817/2512/3162/567	4
GO:0042130	negative regulation of T cell proliferation	4/161	73/18888	0.00350665	0.0381755	0.0303028	3135/5777/10385/3133	4
GO:0140962	multicellular organismal-level chemical homeostasis	4/161	73/18888	0.00350665	0.0381755	0.0303028	57817/231/3162/567	4
GO:1903706	regulation of hemopoiesis	10/161	424/18888	0.00351139	0.0381755	0.0303028	101/3106/3135/5777/10385/440712/28959/567/55365/54209	10
GO:0050920	regulation of chemotaxis	7/161	229/18888	0.00354275	0.0383579	0.0304476	64805/7114/79890/7941/7852/54209/2358	7
GO:0007265	Ras protein signal transduction	5/161	120/18888	0.00366863	0.0393966	0.031272	10750/2048/115727/2889/22821	5
GO:0071346	cellular response to type II interferon	5/161	120/18888	0.00366863	0.0393966	0.031272	6368/84166/10062/730249/6362	5
GO:0002924	negative regulation of humoral immune response mediated by circulating immunoglobulin	2/161	11/18888	0.00377589	0.0397374	0.0315426	5777/1379	2
GO:0010887	negative regulation of cholesterol storage	2/161	11/18888	0.00377589	0.0397374	0.0315426	10062/54209	2
GO:0032836	glomerular basement membrane development	2/161	11/18888	0.00377589	0.0397374	0.0315426	1286/1285	2
GO:1903365	regulation of fear response	2/161	11/18888	0.00377589	0.0397374	0.0315426	2048/348	2
GO:2001171	positive regulation of ATP biosynthetic process	2/161	11/18888	0.00377589	0.0397374	0.0315426	7114/54209	2
GO:0019722	calcium-mediated signaling	7/161	232/18888	0.00380438	0.0398778	0.031654	64805/6401/22821/7852/5336/54209/2358	7
GO:0002637	regulation of immunoglobulin production	4/161	75/18888	0.00386486	0.040351	0.0320296	51237/2048/3133/7293	4
GO:0030098	lymphocyte differentiation	10/161	432/18888	0.00400409	0.0415842	0.0330085	7471/101/3135/3553/5777/57379/10385/567/338339/5336	10
GO:0032635	interleukin-6 production	6/161	176/18888	0.0040304	0.0415842	0.0330085	3106/3553/5777/11027/5336/54209	6
GO:0032675	regulation of interleukin-6 production	6/161	176/18888	0.0040304	0.0415842	0.0330085	3106/3553/5777/11027/5336/54209	6
GO:0046470	phosphatidylcholine metabolic process	4/161	76/18888	0.00405293	0.0416534	0.0330634	341/7941/10062/1071	4
GO:0030099	myeloid cell differentiation	10/161	439/18888	0.00447877	0.0454204	0.0360536	23601/5777/116071/440712/567/115727/5305/8837/54209/55509	10
GO:0034135	regulation of toll-like receptor 2 signaling pathway	2/161	12/18888	0.00450579	0.0454204	0.0360536	730249/54209	2
GO:0034370	triglyceride-rich lipoprotein particle remodeling	2/161	12/18888	0.00450579	0.0454204	0.0360536	348/1071	2
GO:0034372	very-low-density lipoprotein particle remodeling	2/161	12/18888	0.00450579	0.0454204	0.0360536	348/1071	2
GO:0042364	water-soluble vitamin biosynthetic process	2/161	12/18888	0.00450579	0.0454204	0.0360536	27010/231	2
GO:0051056	regulation of small GTPase mediated signal transduction	8/161	304/18888	0.00461962	0.0463902	0.0368233	23526/2048/56990/348/393/115727/50619/22821	8
GO:0016239	positive regulation of macroautophagy	4/161	79/18888	0.00465405	0.0465582	0.0369568	340061/285180/3162/5305	4
GO:0009595	detection of biotic stimulus	3/161	40/18888	0.00476617	0.04732	0.0375614	3106/3105/54209	3
GO:0150077	regulation of neuroinflammatory response	3/161	40/18888	0.00476617	0.04732	0.0375614	3553/5336/54209	3
[truncated: 12 more columns]

## Sheet: LumA
BP																				KEGG																								Reactome
LumA-ceRM1										LumA-ceRM2										LumA-ceRM1												LumA-ceRM2												LumA-ceRM1
ID	Description	GeneRatio	BgRatio	pvalue	p.adjust	qvalue	geneID	Count		ID	Description	GeneRatio	BgRatio	pvalue	p.adjust	qvalue	geneID	Count		category	subcategory	ID	Description	GeneRatio	BgRatio	pvalue	p.adjust	qvalue	geneID	Count		category	subcategory	ID	Description	GeneRatio	BgRatio	pvalue	p.adjust	qvalue	geneID	Count		ID	Description	GeneRatio	BgRatio	pvalue	p.adjust
GO:0030198	extracellular matrix organization	35/263	332/18888	7.95788e-21	9.62725e-18	8.02072e-18	284217/4921/7837/3915/1307/80781/4629/4323/1291/4016/285590/3491/11117/169611/140766/50509/4314/649/2192/9719/4322/1803/11173/144165/79148/1805/92949/8516/23187/79625/11096/30008/3037/84627/4325	35		GO:0030198	extracellular matrix organization	8/45	332/18888	1.02467e-06	0.000426252	0.000341122	2295/4017/7092/1311/3908/4327/151887/23768	8				hsa04820	Cytoskeleton in muscle cells	19/116	232/8848	1.30971e-10	2.2396e-08	1.97145e-08	284217/1292/4620/10398/4629/2199/1291/50509/633/2192/7057/4619/3339/3693/8516/9260/7169/8082/25802	19				hsa04820	Cytoskeleton in muscle cells	7/22	232/8848	9.48981e-07	5.1245e-05	4.29539e-05	2318/4626/1311/3908/4622/3678/4634	7		R-HSA-1474244	Extracellular matrix organization	32/171	300/11091	2.25088e-18	1.09167e-15
GO:0043062	extracellular structure organization	35/263	333/18888	8.78667e-21	9.62725e-18	8.02072e-18	284217/4921/7837/3915/1307/80781/4629/4323/1291/4016/285590/3491/11117/169611/140766/50509/4314/649/2192/9719/4322/1803/11173/144165/79148/1805/92949/8516/23187/79625/11096/30008/3037/84627/4325	35		GO:0043062	extracellular structure organization	8/45	333/18888	1.04805e-06	0.000426252	0.000341122	2295/4017/7092/1311/3908/4327/151887/23768	8		Environmental Information Processing	Signaling molecules and interaction	hsa04512	ECM-receptor interaction	8/116	89/8848	1.99819e-05	0.00170845	0.0015039	284217/1292/3915/1291/7057/3339/3693/8516	8		Environmental Information Processing	Signaling molecules and interaction	hsa04512	ECM-receptor interaction	3/22	89/8848	0.00131933	0.0286531	0.0240172	1311/3908/3678	3		R-HSA-1474290	Collagen formation	12/171	90/11091	1.18362e-08	2.45458e-06
GO:0045229	external encapsulating structure organization	35/263	334/18888	9.69837e-21	9.62725e-18	8.02072e-18	284217/4921/7837/3915/1307/80781/4629/4323/1291/4016/285590/3491/11117/169611/140766/50509/4314/649/2192/9719/4322/1803/11173/144165/79148/1805/92949/8516/23187/79625/11096/30008/3037/84627/4325	35		GO:0045229	external encapsulating structure organization	8/45	334/18888	1.07188e-06	0.000426252	0.000341122	2295/4017/7092/1311/3908/4327/151887/23768	8		Cellular Processes	Cell motility	hsa04810	Regulation of actin cytoskeleton	12/116	230/8848	4.51643e-05	0.00257436	0.00226614	1902/2246/10398/4629/2252/2846/8823/56034/3693/8516/8817/6387	12		Human Diseases	Cardiovascular disease	hsa05410	Hypertrophic cardiomyopathy	3/22	99/8848	0.0017931	0.0286531	0.0240172	3908/3678/4634	3		R-HSA-1566948	Elastic fibre formation	9/171	44/11091	1.77886e-08	2.45458e-06
GO:0031589	cell-substrate adhesion	28/263	359/18888	1.68277e-13	1.25282e-10	1.04376e-10	3915/1307/4323/2199/55679/79834/54453/3491/11117/8499/50509/2192/10395/5054/7057/7070/10085/683/3693/55742/25992/8516/10979/1490/79625/5328/30008/3037	28		GO:0007409	axonogenesis	8/45	455/18888	1.05098e-05	0.00313455	0.00250852	4692/10154/2736/9638/3908/9353/23768/6586	8		Human Diseases	Cardiovascular disease	hsa05414	Dilated cardiomyopathy	8/116	105/8848	6.62918e-05	0.00283397	0.00249466	284217/781/3693/7043/8516/5350/7169/8082	8		Human Diseases	Cardiovascular disease	hsa05414	Dilated cardiomyopathy	3/22	105/8848	0.00212245	0.0286531	0.0240172	3908/3678/4634	3		R-HSA-3000178	ECM proteoglycans	11/171	76/11091	2.04057e-08	2.45458e-06
GO:0060348	bone development	21/263	215/18888	2.89797e-12	1.72603e-09	1.438e-09	4921/2121/8642/4882/4323/1291/285590/5308/633/338773/4322/11173/6474/56034/359845/7043/8817/1833/7291/3037/4325	21		GO:0007411	axon guidance	6/45	234/18888	1.84391e-05	0.00366631	0.00293408	2736/9638/3908/9353/23768/6586	6		Environmental Information Processing	Signal transduction	hsa04390	Hippo signaling pathway	9/116	157/8848	0.000209379	0.00635128	0.00559085	353500/2246/122786/6591/5054/85409/7043/1490/26524	9														R-HSA-2022090	Assembly of collagen fibrils and other multimeric structures	10/171	61/11091	2.66924e-08	2.45458e-06
GO:0001503	ossification	28/263	446/18888	3.12658e-11	1.55183e-08	1.29287e-08	353500/4921/9902/8642/4882/6591/4323/5745/1291/3491/649/338773/4322/11173/144165/6474/359845/6320/2922/8817/10979/1490/9464/9260/7291/4325/4920/117581	28		GO:0097485	neuron projection guidance	6/45	234/18888	1.84391e-05	0.00366631	0.00293408	2736/9638/3908/9353/23768/6586	6		Environmental Information Processing	Signal transduction	hsa04151	PI3K-Akt signaling pathway	14/116	362/8848	0.000260613	0.00635128	0.00559085	284217/1902/1292/3915/2246/1291/2252/2846/7057/8823/56034/3693/8516/8817	14		LumA-ceRM3												R-HSA-1474228	Degradation of the extracellular matrix	14/171	140/11091	3.0366e-08	2.45458e-06
GO:0010810	regulation of cell-substrate adhesion	20/263	221/18888	3.93836e-11	1.67549e-08	1.3959e-08	1307/4323/2199/55679/79834/54453/3491/11117/2192/10395/5054/7057/7070/10085/683/10979/79625/5328/30008/3037	20		GO:0048566	embryonic digestive tract development	3/45	33/18888	6.55829e-05	0.0111772	0.00894492	2736/2295/5125	3		Human Diseases	Cardiovascular disease	hsa05410	Hypertrophic cardiomyopathy	7/116	99/8848	0.000305716	0.00635128	0.00559085	284217/781/3693/7043/8516/7169/8082	7		category	subcategory	ID	Description	GeneRatio	BgRatio	pvalue	p.adjust	qvalue	geneID	Count		R-HSA-2129379	Molecules associated with elastic fibres	8/171	37/11091	7.14946e-08	4.33436e-06
GO:0030199	collagen fibril organization	12/263	66/18888	1.04456e-10	3.88837e-08	3.23951e-08	4921/7837/80781/1291/4016/11117/140766/50509/649/11173/1805/30008	12		GO:0006936	muscle contraction	6/45	355/18888	0.000185409	0.025241	0.0202	5587/4626/2149/1311/4622/4634	6		Cellular Processes	Cellular community - eukaryotes	hsa04510	Focal adhesion	10/116	203/8848	0.000318847	0.00635128	0.00559085	284217/1292/3915/10398/1291/7057/56034/3693/55742/8516	10		Human Diseases	Immune disease	hsa05332	Graft-versus-host disease	10/101	44/8848	4.29395e-11	7.96822e-09	6.91977e-09	3134/3106/3811/3135/3553/355/3804/3105/3133/3107	10		R-HSA-5083635	Defective B3GALTL causes PpS	8/171	37/11091	7.14946e-08	4.33436e-06
GO:0051216	cartilage development	18/263	209/18888	8.59301e-10	2.84333e-07	2.36886e-07	353500/579/2121/4882/6591/5745/1291/3491/633/649/4322/11173/6474/359845/8817/1833/1490/9464	18		GO:0050919	negative chemotaxis	3/45	47/18888	0.000190419	0.025241	0.0202	9353/23768/6586	3		Organismal Systems	Circulatory system	hsa04270	Vascular smooth muscle contraction	8/116	134/8848	0.000361631	0.00635128	0.00559085	10398/4882/59/4629/27345/5322/800/5739	8		Organismal Systems	Immune system	hsa04612	Antigen processing and presentation	12/101	80/8848	7.96822e-11	7.96822e-09	6.91977e-09	3134/3106/3811/3135/6891/3804/3105/3133/567/3107/6890/6892	12		R-HSA-5173214	O-glycosylation of TSR domain-containing proteins	8/171	38/11091	8.9379e-08	4.81653e-06
GO:0007160	cell-matrix adhesion	19/263	241/18888	1.28618e-09	3.83024e-07	3.19108e-07	1307/4323/79834/54453/11117/8499/50509/10395/5054/7057/7070/683/3693/25992/8516/10979/1490/5328/30008	19		GO:0070099	regulation of chemokine-mediated signaling pathway	2/45	12/18888	0.000360801	0.0405858	0.0324801	9353/6586	2		Human Diseases	Cancer: specific types	hsa05218	Melanoma	6/116	73/8848	0.00037142	0.00635128	0.00559085	2246/4286/2252/8823/56034/8817	6		Organismal Systems	Immune system	hsa04650	Natural killer cell mediated cytotoxicity	13/101	135/8848	3.531e-09	2.354e-07	2.04426e-07	3384/3106/3811/3135/5777/117157/355/3804/3105/3133/3383/3107/5336	13		R-HSA-445355	Smooth Muscle Contraction	8/171	45/11091	3.5939e-07	1.74304e-05
GO:0032963	collagen metabolic process	13/263	107/18888	3.11276e-09	8.4271e-07	7.02085e-07	4921/5118/9902/4323/1291/11117/140766/4314/4322/79148/9697/7043/4325	13		GO:0050881	musculoskeletal movement	3/45	59/18888	0.00037422	0.0405858	0.0324801	5587/4626/1311	3		Organismal Systems	Digestive system	hsa04974	Protein digestion and absorption	7/116	105/8848	0.000438209	0.00681217	0.00599655	1292/1307/80781/1291/50509/1803/4311	7		Human Diseases	Endocrine and metabolic disease	hsa04940	Type I diabetes mellitus	8/101	43/8848	2.27152e-08	1.13576e-06	9.86318e-07	3134/3106/3135/3553/355/3105/3133/3107	8		R-HSA-1442490	Collagen degradation	8/171	64/11091	5.75345e-06	0.000243055
GO:0061448	connective tissue development	20/263	288/18888	4.2301e-09	1.04977e-06	8.74591e-07	353500/579/2121/4882/59/6591/5745/1291/285590/3491/633/649/4322/11173/6474/359845/8817/1833/1490/9464	20		GO:0050879	multicellular organismal movement	3/45	61/18888	0.000412915	0.0410506	0.0328521	5587/4626/1311	3		Environmental Information Processing	Signal transduction	hsa04350	TGF-beta signaling pathway	6/116	108/8848	0.00288258	0.0410768	0.0361587	353500/5308/64388/7057/10468/7043	6		Human Diseases	Infectious disease: viral	hsa05163	Human cytomegalovirus infection	15/101	226/8848	3.42871e-08	1.37148e-06	1.19103e-06	3134/340061/3106/3135/3553/355/6891/113/3105/3133/567/3107/6890/7852/6892	15		R-HSA-216083	Integrin cell surface interactions	9/171	85/11091	6.01374e-06	0.000243055
GO:0003007	heart morphogenesis	19/263	269/18888	7.92825e-09	1.81618e-06	1.51311e-06	8642/6591/5308/3084/3491/10395/8828/2702/26508/144165/6474/115701/5311/55742/9645/9464/11096/7291/3037	19		GO:0003018	vascular process in circulatory system	5/45	275/18888	0.000478745	0.0414099	0.0331396	2149/1311/9590/9353/79987	5														Human Diseases	Infectious disease: viral	hsa05170	Human immunodeficiency virus 1 infection	14/101	213/8848	1.15749e-07	3.61141e-06	3.13622e-06	3134/340061/3106/3135/355/6891/3105/3133/567/3107/6890/7852/5336/6892	14		R-HSA-1650814	Collagen biosynthesis and modifying enzymes	8/171	67/11091	8.15183e-06	0.000304126
GO:0060485	mesenchyme development	21/263	336/18888	1.10771e-08	2.35627e-06	1.96307e-06	10371/147906/7041/8642/59/6591/5308/3084/8828/26508/144165/359845/5311/7043/10979/23187/9037/9464/11096/7291/3037	21		GO:0030049	muscle filament sliding	2/45	14/18888	0.000495961	0.0414099	0.0331396	4626/4622	2		LumA-ceRM4												Human Diseases	Immune disease	hsa05320	Autoimmune thyroid disease	8/101	53/8848	1.26399e-07	3.61141e-06	3.13622e-06	3134/3106/7253/3135/355/3105/3133/3107	8		R-HSA-3906995	Diseases associated with O-glycosylation of proteins	8/171	69/11091	1.01805e-05	0.000352681
GO:1903053	regulation of extracellular matrix organization	10/263	72/18888	5.79922e-08	1.15134e-05	9.59211e-06	284217/4921/3915/1291/11117/1803/23187/30008/3037/84627	10		GO:0030199	collagen fibril organization	3/45	66/18888	0.000520661	0.0414099	0.0331396	4017/7092/1311	3		category	subcategory	ID	Description	GeneRatio	BgRatio	pvalue	p.adjust	qvalue	geneID	Count		Human Diseases	Immune disease	hsa05330	Allograft rejection	7/101	38/8848	1.93372e-07	4.8343e-06	4.19821e-06	3134/3106/3135/355/3105/3133/3107	7		R-HSA-397014	Muscle contraction	13/171	205/11091	1.66611e-05	0.000538709
GO:0001667	ameboidal-type cell migration	24/263	498/18888	1.40386e-07	2.61293e-05	2.1769e-05	4921/57124/10371/2246/79899/59/6591/54453/5308/2252/25959/25960/7057/1803/8823/8828/8817/9037/7145/9464/7291/3037/5793/85360	24		GO:0050905	neuromuscular process	4/45	165/18888	0.000632907	0.0457575	0.0366189	50944/5587/4626/1311	4		Organismal Systems	Endocrine system	hsa03320	PPAR signaling pathway	8/25	76/8848	1.95423e-11	1.27025e-09	1.00797e-09	729359/5346/5105/2167/4023/948/9370/364	8		Human Diseases	Infectious disease: viral	hsa05169	Epstein-Barr virus infection	13/101	203/8848	4.60243e-07	1.02276e-05	8.88188e-06	3134/3106/3135/355/6891/3105/3133/567/3383/3107/6890/5336/6892	13		R-HSA-3000171	Non-integrin membrane-ECM interactions	7/171	59/11091	3.18181e-05	0.000964487
GO:0042692	muscle cell differentiation	22/263	428/18888	1.58641e-07	2.7361e-05	2.27952e-05	284217/3915/84814/10398/4629/4323/5738/1291/3084/79365/338773/5999/144165/6474/115701/79652/8516/30846/11096/30008/25802/80206	22		GO:0033275	actin-myosin filament sliding	2/45	16/18888	0.000652035	0.0457575	0.0366189	4626/4622	2		Organismal Systems	Endocrine system	hsa04923	Regulation of lipolysis in adipocytes	5/25	59/8848	5.32131e-07	1.72943e-05	1.37234e-05	5346/3991/2167/364/63924	5		Human Diseases	Cardiovascular disease	hsa05416	Viral myocarditis	8/101	69/8848	1.02618e-06	2.05237e-05	1.78232e-05	3134/3106/3135/4624/3105/3133/3383/3107	8		R-HSA-3781865	Diseases of glycosylation	10/171	144/11091	7.56692e-05	0.0021588
GO:0010811	positive regulation of cell-substrate adhesion	12/263	124/18888	1.65379e-07	2.7361e-05	2.27952e-05	1307/2199/55679/54453/3491/11117/7070/10085/10979/79625/30008/3037	12		GO:0003012	muscle system process	6/45	459/18888	0.00072714	0.0481932	0.0385682	5587/4626/2149/1311/4622/4634	6		Environmental Information Processing	Signal transduction	hsa04152	AMPK signaling pathway	6/25	122/8848	8.68221e-07	1.88114e-05	1.49273e-05	3991/5105/948/3952/9370/1149	6		Human Diseases	Infectious disease: viral	hsa05166	Human T-cell leukemia virus 1 infection	11/101	223/8848	4.41323e-05	0.000802405	0.000696825	3134/3106/3135/113/3105/115650/3133/567/3383/3107/7850	11		R-HSA-2033519	Activated point mutants of FGFR2	4/171	17/11091	0.000110995	0.00299071
GO:0001952	regulation of cell-matrix adhesion	12/263	125/18888	1.80704e-07	2.83229e-05	2.35966e-05	1307/4323/79834/54453/10395/5054/7057/7070/683/10979/5328/30008	12		GO:0001991	regulation of systemic arterial blood pressure by circulatory renin-angiotensin	2/45	18/18888	0.000828828	0.0494396	0.0395656	2149/5125	2		Organismal Systems	Endocrine system	hsa04920	Adipocytokine signaling pathway	4/25	70/8848	4.00876e-05	0.000651424	0.000516919	5105/948/3952/9370	4		Human Diseases	Infectious disease: parasitic	hsa05143	African trypanosomiasis	5/101	37/8848	5.72321e-05	0.000953869	0.00082836	3553/355/6401/8542/3383	5		R-HSA-1592389	Activation of Matrix Metalloproteinases	5/171	33/11091	0.000137459	0.0032564
GO:0061035	regulation of cartilage development	9/263	72/18888	6.79475e-07	0.000101174	8.42907e-05	579/6591/3491/649/11173/6474/359845/8817/1490	9		GO:0043116	negative regulation of vascular permeability	2/45	18/18888	0.000828828	0.0494396	0.0395656	9590/9353	2		Metabolism	Carbohydrate metabolism	hsa00620	Pyruvate metabolism	3/25	47/8848	0.000297684	0.00386989	0.00307084	5105/124/125	3		Cellular Processes	Transport and catabolism	hsa04145	Phagosome	9/101	157/8848	7.19038e-05	0.0010272	0.000892039	3134/526/3106/3135/6891/3105/3133/3107/6890	9		R-HSA-2243919	Crosslinking of collagen fibrils	4/171	18/11091	0.000140999	0.0032564
GO:0003170	heart valve development	9/263	73/18888	7.65691e-07	0.000108582	9.04629e-05	8642/6591/3491/11117/2702/26508/6474/11096/7291	9												Metabolism	Carbohydrate metabolism	hsa00010	Glycolysis / Gluconeogenesis	3/25	67/8848	0.00084729	0.0082155	0.00651919	5105/124/125	3		Environmental Information Processing	Signaling molecules and interaction	hsa04514	Cell adhesion molecules	9/101	157/8848	7.19038e-05	0.0010272	0.000892039	3134/3384/3106/3135/6401/3105/3133/3383/3107	9		R-HSA-5654221	Phospholipase C-mediated cascade; FGFR2	4/171	18/11091	0.000140999	0.0032564
GO:0048705	skeletal system morphogenesis	15/263	229/18888	8.09846e-07	0.000109624	9.13305e-05	579/4882/4323/649/338773/4322/6474/359845/7043/3224/8817/1490/7291/3037/4325	15		LumA-ceRM3										Metabolism	Metabolism of cofactors and vitamins	hsa00830	Retinol metabolism	3/25	68/8848	0.000884747	0.0082155	0.00651919	124/125/5959	3		Human Diseases	Infectious disease: parasitic	hsa05144	Malaria	5/101	50/8848	0.000247385	0.00329846	0.00286445	2995/3553/1379/6401/3383	5		R-HSA-190241	FGFR2 ligand binding and activation	4/171	20/11091	0.000217934	0.00480446
GO:0085029	extracellular matrix assembly	8/263	55/18888	8.78407e-07	0.000113735	9.47554e-05	7837/4629/1291/11117/144165/23187/30008/3037	8		ID	Description	GeneRatio	BgRatio	pvalue	p.adjust	qvalue	geneID	Count		Metabolism	Amino acid metabolism	hsa00350	Tyrosine metabolism	2/25	36/8848	0.00455292	0.0369925	0.0293544	124/125	2		Human Diseases	Infectious disease: viral	hsa05167	Kaposi sarcoma-associated herpesvirus infection	9/101	196/8848	0.000384824	0.00456797	0.00396692	3134/3106/3135/355/3105/3133/3383/3107/5336	9		R-HSA-5173105	O-linked glycosylation	8/171	112/11091	0.000330346	0.006966
GO:0060349	bone morphogenesis	10/263	99/18888	1.21203e-06	0.000148827	0.000123992	4882/4323/338773/4322/6474/7043/8817/7291/3037/4325	10		GO:0019885	antigen processing and presentation of endogenous peptide antigen via MHC class I	10/161	23/18888	1.58795e-15	4.1779e-12	3.31631e-12	3134/3106/3135/6891/3105/3133/567/3107/6890/6892	10		Metabolism	Lipid metabolism	hsa00071	Fatty acid degradation	2/25	43/8848	0.00644748	0.0465651	0.0369504	124/125	2		Human Diseases	Infectious disease: viral	hsa05165	Human papillomavirus infection	12/101	333/8848	0.000388278	0.00456797	0.00396692	7471/3134/526/3106/3135/355/1286/1285/3105/3133/3107/256076	12		R-HSA-5654695	PI-3K cascade:FGFR2	4/171	23/11091	0.000384189	0.00745327
GO:0048762	mesenchymal cell differentiation	16/263	269/18888	1.24939e-06	0.000148827	0.000123992	10371/147906/7041/6591/5308/3084/8828/26508/359845/7043/10979/23187/9037/9464/7291/3037	16		GO:0002483	antigen processing and presentation of endogenous peptide antigen	10/161	25/18888	4.47127e-15	5.88196e-12	4.66895e-12	3134/3106/3135/6891/3105/3133/567/3107/6890/6892	10		Human Diseases	Endocrine and metabolic disease	hsa04936	Alcoholic liver disease	3/25	144/8848	0.00746958	0.0485523	0.0385273	124/125/9370	3		Human Diseases	Immune disease	hsa05340	Primary immunodeficiency	4/101	38/8848	0.000876437	0.00973819	0.00845685	6891/57379/115650/6890	4		R-HSA-5654699	SHC-mediated cascade:FGFR2	4/171	23/11091	0.000384189	0.00745327
GO:0150115	cell-substrate junction organization	10/263	103/18888	1.74802e-06	0.000200216	0.000166805	3915/1307/4323/79834/10395/7057/7070/144165/10979/7145	10		GO:0019883	antigen processing and presentation of endogenous antigen	10/161	32/18888	8.38511e-14	7.35374e-11	5.83721e-11	3134/3106/3135/6891/3105/3133/567/3107/6890/6892	10														Human Diseases	Endocrine and metabolic disease	hsa04933	AGE-RAGE signaling pathway in diabetic complications	6/101	101/8848	0.00100698	0.0105998	0.00920508	3553/1286/1285/6401/3383/5336	6		R-HSA-419037	NCAM1 interactions	5/171	42/11091	0.000440521	0.0082174
GO:0003179	heart valve morphogenesis	8/263	61/18888	1.97682e-06	0.000214668	0.000178846	8642/6591/3491/11117/2702/26508/11096/7291	8		GO:0002474	antigen processing and presentation of peptide antigen via MHC class I	10/161	37/18888	4.36531e-13	2.87128e-10	2.27915e-10	3134/3106/3135/6891/3105/3133/567/3107/6890/6892	10		LumA-ceRM5												Environmental Information Processing	Signaling molecules and interaction	hsa04060	Cytokine-cytokine receptor interaction	10/101	298/8848	0.00206604	0.0206604	0.017942	3553/355/6368/115650/970/7293/7850/7852/6362/5008	10		R-HSA-5654700	FRS-mediated FGFR2 signaling	4/171	25/11091	0.000535808	0.00950257
GO:0051146	striated muscle cell differentiation	17/263	313/18888	2.01837e-06	0.000214668	0.000178846	84814/10398/4629/4323/5738/1291/3084/79365/338773/5999/144165/6474/115701/30846/11096/25802/80206	17		GO:0002428	antigen processing and presentation of peptide antigen via MHC class Ib	8/161	18/18888	9.52137e-13	5.01014e-10	3.97692e-10	3134/3106/3135/6891/3105/3133/567/3107	8		category	subcategory	ID	Description	GeneRatio	BgRatio	pvalue	p.adjust	qvalue	geneID	Count		Organismal Systems	Digestive system	hsa04979	Cholesterol metabolism	4/101	51/8848	0.00264953	0.0252336	0.0219134	341/348/5360/1071	4		R-HSA-8948216	Collagen chain trimerization	5/171	44/11091	0.000548602	0.00950257
GO:0006935	chemotaxis	21/263	466/18888	2.54402e-06	0.000261244	0.00021765	123920/10371/1902/2246/3084/2252/3491/5919/25960/5054/7057/1803/8823/8828/79148/683/55742/8817/9037/6387/5328	21		GO:0019882	antigen processing and presentation	14/161	117/18888	1.30139e-12	5.70657e-10	4.52973e-10	3134/3106/3135/6891/51762/5696/3105/3133/567/3383/3107/6890/54209/6892	14		Cellular Processes	Cell growth and death	hsa04110	Cell cycle	50/176	158/8848	4.31539e-48	5.61001e-46	4.72422e-46	9088/7272/994/1111/990/8318/11200/10403/1017/10926/5347/991/4175/4176/995/4085/9700/8317/898/57082/890/9319/1870/113130/81620/9232/9133/9134/6502/983/157570/699/5933/27085/993/4171/90381/1032/23594/26271/5111/4173/151648/4172/4174/4998/1869/9212/891/701	50		Organismal Systems	Immune system	hsa04662	B cell receptor signaling pathway	5/101	91/8848	0.00375764	0.0341604	0.0296656	27071/11024/5777/11027/5336	5		R-HSA-1839130	Signaling by activated point mutants of FGFR3	3/171	12/11091	0.000715179	0.0115621
GO:0030574	collagen catabolic process	7/263	45/18888	2.70614e-06	0.00026135	0.000217738	9902/4323/140766/4314/4322/79148/4325	7		GO:0002475	antigen processing and presentation via MHC class Ib	8/161	25/18888	2.23735e-11	7.76822e-09	6.16622e-09	3134/3106/3135/6891/3105/3133/567/3107	8		Genetic Information Processing	Replication and repair	hsa03030	DNA replication	20/176	36/8848	1.74298e-25	1.13293e-23	9.5405e-24	5985/23649/2237/1763/5426/5427/5983/10535/5557/4175/4176/5984/5422/4171/5982/5111/4173/5558/4172/4174	20														R-HSA-2033514	FGFR3 mutant receptor activation	3/171	12/11091	0.000715179	0.0115621
GO:0042330	taxis	21/263	468/18888	2.72057e-06	0.00026135	0.000217738	123920/10371/1902/2246/3084/2252/3491/5919/25960/5054/7057/1803/8823/8828/79148/683/55742/8817/9037/6387/5328	21		GO:0048002	antigen processing and presentation of peptide antigen	11/161	72/18888	2.36206e-11	7.76822e-09	6.16622e-09	3134/3106/3135/6891/3105/3133/567/3107/6890/54209/6892	11		Genetic Information Processing	Replication and repair	hsa03460	Fanconi anemia pathway	14/176	55/8848	1.93452e-12	8.38293e-11	7.05931e-11	116028/675/83990/2189/2175/146956/641/55215/2187/2177/5888/2176/29089/7398	14		LumA-ceRM6												R-HSA-190239	FGFR3 ligand binding and activation	3/171	13/11091	0.000919234	0.0131126
GO:0022617	extracellular matrix disassembly	8/263	64/18888	2.86612e-06	0.000266728	0.000222218	4921/3915/4323/285590/4314/4322/1803/11096	8		GO:0002476	antigen processing and presentation of endogenous peptide antigen via MHC class Ib	7/161	17/18888	5.19177e-11	1.36596e-08	1.08426e-08	3134/3106/3135/6891/3105/3133/3107	7		Cellular Processes	Cell growth and death	hsa04114	Oocyte meiosis	18/176	139/8848	2.28972e-10	7.44159e-09	6.26661e-09	9088/1017/5347/991/995/4085/9700/898/6790/9232/9133/9134/983/699/286151/26271/151648/891	18		category	subcategory	ID	Description	GeneRatio	BgRatio	pvalue	p.adjust	qvalue	geneID	Count		R-HSA-190372	FGFR3c ligand binding and activation	3/171	13/11091	0.000919234	0.0131126
GO:0007229	integrin-mediated signaling pathway	10/263	111/18888	3.46438e-06	0.000312634	0.000260464	284217/3915/1307/55679/7070/683/3693/8516/10979/1490	10		GO:0002484	antigen processing and presentation of endogenous peptide antigen via MHC class I via ER pathway	7/161	17/18888	5.19177e-11	1.36596e-08	1.08426e-08	3134/3106/3135/6891/3105/3133/3107	7		Genetic Information Processing	Replication and repair	hsa03440	Homologous recombination	10/176	41/8848	4.93998e-09	1.28439e-07	1.08159e-07	8438/675/83990/146956/7516/641/25788/11073/5888/580	10		Environmental Information Processing	Signaling molecules and interaction	hsa04060	Cytokine-cytokine receptor interaction	33/266	298/8848	6.13895e-11	1.67593e-08	1.33118e-08	9560/6356/10803/11009/3566/3579/50616/6366/414062/3563/3553/355/133396/2688/6368/64109/8995/3588/90865/246778/115650/6370/970/7124/3568/3455/7293/1232/1437/3605/7852/5008/6369	33		R-HSA-190375	FGFR2c ligand binding and activation	3/171	13/11091	0.000919234	0.0131126
GO:0050920	regulation of chemotaxis	14/263	229/18888	4.24538e-06	0.000371846	0.000309795	10371/1902/2246/5919/25960/5054/7057/1803/8823/79148/683/8817/9037/6387	14		GO:0002699	positive regulation of immune effector process	17/161	257/18888	7.42261e-11	1.77535e-08	1.40923e-08	3134/51237/3106/3135/3553/5777/117157/2048/6891/3105/3133/7293/567/3107/3663/5336/54209	17		Genetic Information Processing	Replication and repair	hsa03430	Mismatch repair	8/176	23/8848	7.9469e-09	1.72183e-07	1.44996e-07	5985/5983/5984/9156/2956/4436/5982/5111	8		Human Diseases	Infectious disease: viral	hsa05163	Human cytomegalovirus infection	27/266	226/8848	7.0523e-10	9.62639e-08	7.64618e-08	3134/9560/340061/3106/3579/5732/414062/3135/3553/355/5533/6891/113/3588/54331/3105/3133/7124/4792/567/3107/1232/2771/94235/6890/7852/6892	27		R-HSA-5654227	Phospholipase C-mediated cascade; FGFR3	3/171	13/11091	0.000919234	0.0131126
GO:0001958	endochondral ossification	6/263	32/18888	4.60333e-06	0.000380798	0.000317253	4882/4323/338773/4322/8817/4325	6		GO:0002697	regulation of immune effector process	19/161	385/18888	7.9753e-10	1.74858e-07	1.38798e-07	3134/51237/3106/3135/3553/5777/117157/2048/6891/1379/3105/3133/7293/567/3383/3107/3663/5336/54209	19		Genetic Information Processing	Replication and repair	hsa03410	Base excision repair	10/176	44/8848	1.03836e-08	1.92838e-07	1.6239e-07	5985/2237/5426/5427/5983/55247/5984/5982/5111/7374	10		Organismal Systems	Immune system	hsa04612	Antigen processing and presentation	16/266	80/8848	1.36355e-09	1.24083e-07	9.85587e-08	3134/3106/3823/3135/6891/1514/3105/3822/3133/3809/7124/567/3107/6890/5641/6892	16		R-HSA-3000157	Laminin interactions	4/171	30/11091	0.00109319	0.0147278
GO:0036075	replacement ossification	6/263	32/18888	4.60333e-06	0.000380798	0.000317253	4882/4323/338773/4322/8817/4325	6		GO:0002456	T cell mediated immunity	12/161	129/18888	1.07825e-09	2.18222e-07	1.73219e-07	3134/3106/3135/3553/6891/1379/3105/970/3133/567/3383/3107	12		Organismal Systems	Endocrine system	hsa04914	Progesterone-mediated oocyte maturation	14/176	111/8848	3.54755e-08	5.76476e-07	4.85454e-07	9088/994/1017/5347/995/4085/890/6790/9133/983/699/993/3835/891	14		Organismal Systems	Immune system	hsa04650	Natural killer cell mediated cytotoxicity	19/266	135/8848	1.81891e-08	1.2414e-06	9.86039e-07	2534/3384/3106/3823/3135/5777/355/5533/3105/3822/2215/3133/3809/7124/3455/3383/3107/1437/4277	19		R-HSA-5654696	Downstream signaling of activated FGFR2	4/171	30/11091	0.00109319	0.0147278
GO:0007044	cell-substrate junction assembly	9/263	96/18888	7.74105e-06	0.00062305	0.00051908	3915/1307/4323/79834/10395/7057/7070/10979/7145	9		GO:0001916	positive regulation of T cell mediated cytotoxicity	8/161	40/18888	1.42753e-09	2.68273e-07	2.12948e-07	3134/3106/3135/6891/3105/3133/567/3107	8		Cellular Processes	Cell growth and death	hsa04218	Cellular senescence	16/176	157/8848	7.82709e-08	1.13058e-06	9.52067e-07	1111/11200/1017/898/4605/890/1870/2305/9133/9134/983/5933/993/286826/1869/891	16		Human Diseases	Infectious disease: viral	hsa05169	Epstein-Barr virus infection	23/266	203/8848	3.78999e-08	2.06933e-06	1.64366e-06	3134/7097/3106/29760/3135/4067/355/6891/9020/3105/3133/7124/4792/3455/567/3383/4615/3107/1380/6890/953/864/6892	23		R-HSA-190322	FGFR4 ligand binding and activation	3/171	14/11091	0.00115673	0.0151626
GO:0032970	regulation of actin filament-based process	18/263	385/18888	8.19546e-06	0.000636033	0.000529897	1902/122786/59/25959/10395/163782/2702/5999/683/7043/10979/1490/9037/6387/5350/55243/25802/80206	18		GO:0002486	antigen processing and presentation of endogenous peptide antigen via MHC class I via ER pathway, TAP-independent	6/161	16/18888	2.60691e-09	4.57252e-07	3.62955e-07	3134/3106/3135/3105/3133/3107	6		Cellular Processes	Cell motility	hsa04814	Motor proteins	16/176	197/8848	1.74532e-06	2.26892e-05	1.91067e-05	1062/84790/24137/11004/3832/9493/3833/9585/10376/10112/146909/9928/81930/203068/3835/56992	16		Human Diseases	Infectious disease: viral	hsa05170	Human immunodeficiency virus 1 infection	22/266	213/8848	3.91703e-07	1.78225e-05	1.41563e-05	3134/340061/7097/3106/200316/3135/355/5533/6891/54331/3105/3133/7124/4792/567/4615/3107/2771/94235/6890/7852/6892	22		R-HSA-5654228	Phospholipase C-mediated cascade; FGFR4	3/171	15/11091	0.00142961	0.0182464
GO:0032330	regulation of chondrocyte differentiation	7/263	53/18888	8.36012e-06	0.000636033	0.000529897	579/6591/11173/6474/359845/8817/1490	7		GO:0002819	regulation of adaptive immune response	14/161	207/18888	2.84431e-09	4.58438e-07	3.63897e-07	3134/3106/3135/3553/5777/2048/6891/1379/113/3105/3133/567/3107/54209	14		Cellular Processes	Cell growth and death	hsa04115	p53 signaling pathway	10/176	75/8848	2.03668e-06	2.40698e-05	2.02693e-05	1111/11200/1017/51512/6241/898/9133/9134/983/891	10		Environmental Information Processing	Signaling molecules and interaction	hsa04061	Viral protein interaction with cytokine and cytokine receptor	14/266	100/8848	1.52932e-06	5.57178e-05	4.42562e-05	9560/6356/10803/11009/3579/6366/414062/6368/3588/6370/7124/1232/7852/6369	14		R-HSA-1839126	FGFR2 mutant receptor activation	4/171	33/11091	0.00157472	0.019583
GO:0060973	cell migration involved in heart development	5/263	21/18888	8.5431e-06	0.000636033	0.000529897	8642/6591/5308/9464/7291	5		GO:0002449	lymphocyte mediated immunity	18/161	372/18888	3.12707e-09	4.58438e-07	3.63897e-07	3134/3106/3811/3135/3553/5777/117157/6891/57379/1379/3105/970/3133/567/3383/3107/202309/54209	18		Human Diseases	Infectious disease: viral	hsa05166	Human T-cell leukemia virus 1 infection	16/176	223/8848	8.7162e-06	9.44255e-05	7.95162e-05	5901/1111/11200/1017/991/4085/9700/898/890/1870/7514/9232/9133/9134/1869/701	16		Human Diseases	Infectious disease: viral	hsa05167	Kaposi sarcoma-associated herpesvirus infection	20/266	196/8848	1.63275e-06	5.57178e-05	4.42562e-05	3134/3717/3106/3135/4067/355/5533/54331/3105/3133/4792/3455/440738/3383/3107/1232/1437/94235/4277/6932	20		R-HSA-5654727	Negative regulation of FGFR2 signaling	4/171	34/11091	0.00176346	0.0213819
GO:0007015	actin filament organization	20/263	467/18888	9.42494e-06	0.000684572	0.000570336	1902/57471/25959/1264/10395/163782/5999/359845/3693/7043/800/9645/10979/1490/9037/6387/55243/7169/25802/80206	20		GO:0002703	regulation of leukocyte mediated immunity	15/161	246/18888	3.13641e-09	4.58438e-07	3.63897e-07	3134/3106/3135/3553/5777/117157/6891/1379/3105/3133/567/3383/3107/5336/54209	15		Genetic Information Processing	Replication and repair	hsa03420	Nucleotide excision repair	8/176	63/8848	3.1849e-05	0.00031849	0.000268202	5985/5426/5427/5983/5984/5982/5111/5433	8		Human Diseases	Endocrine and metabolic disease	hsa04940	Type I diabetes mellitus	9/266	43/8848	4.03229e-06	0.000116045	9.21738e-05	3134/3106/3135/3553/355/3105/3133/7124/3107	9		R-HSA-186797	Signaling by PDGF	5/171	58/11091	0.00194635	0.0230239
GO:0030282	bone mineralization	10/263	127/18888	1.15693e-05	0.000820322	0.000683432	4921/5745/1291/3491/338773/4322/144165/359845/7291/4920	10		GO:0045824	negative regulation of innate immune response	10/161	88/18888	3.89969e-09	5.33693e-07	4.23632e-07	3134/3106/9111/3135/6737/84166/3105/3133/10062/730249	10		Human Diseases	Cancer: specific types	hsa05222	Small cell lung cancer	8/176	93/8848	0.000504864	0.00468802	0.00394781	1017/898/1164/1870/9134/6502/1869/1163	8		Cellular Processes	Transport and catabolism	hsa04145	Phagosome	17/266	157/8848	4.50288e-06	0.000116045	9.21738e-05	4353/10333/3134/7097/526/3106/3135/6891/1514/715/2204/3105/2215/3133/3107/8685/6890	17		R-HSA-446353	Cell-extracellular matrix interactions	3/171	18/11091	0.00247825	0.02671
GO:0071711	basement membrane organization	6/263	38/18888	1.30759e-05	0.000905583	0.000754466	284217/7837/3915/1291/144165/23187	6		GO:0031348	negative regulation of defense response	16/161	291/18888	4.05696e-09	5.33693e-07	4.23632e-07	3134/57817/3106/9111/7114/3135/5777/6737/84166/3105/3133/348/10062/730249/54209/2358	16		Metabolism	Nucleotide metabolism	hsa00240	Pyrimidine metabolism	6/176	58/8848	0.000976974	0.00846711	0.0071302	7084/1503/6241/7083/7298/6240	6		Human Diseases	Immune disease	hsa05332	Graft-versus-host disease	9/266	44/8848	4.93737e-06	0.000116045	9.21738e-05	3134/3106/3135/3553/355/3105/3133/7124/3107	9		R-HSA-5635838	Activation of SMO	3/171	18/11091	0.00247825	0.02671
GO:0014032	neural crest cell development	8/263	80/18888	1.54941e-05	0.00104867	0.000873675	10371/6591/5308/3084/8828/9037/9464/7291	8		GO:0050867	positive regulation of cell activation	18/161	380/18888	4.36589e-09	5.46983e-07	4.34181e-07	101/57817/23149/3135/3553/5777/2048/10385/3105/115650/970/3133/7293/567/283234/338339/11027/54209	18		Metabolism	Global and overview maps	hsa01232	Nucleotide metabolism	7/176	85/8848	0.00146394	0.0118945	0.0100164	7084/1503/6241/7083/7298/8833/6240	7		Organismal Systems	Immune system	hsa04062	Chemokine signaling pathway	19/266	193/8848	5.10088e-06	0.000116045	9.21738e-05	9560/6356/10803/3717/3579/6366/414062/4067/6368/113/54331/6370/4792/1232/2771/94235/7852/2869/6369	19		R-HSA-5654704	SHC-mediated cascade:FGFR3	3/171	18/11091	0.00247825	0.02671
GO:0003151	outflow tract morphogenesis	8/263	81/18888	1.69874e-05	0.00111641	0.000930111	5308/8828/2702/26508/144165/55742/9464/7291	8		GO:0002832	negative regulation of response to biotic stimulus	11/161	119/18888	5.84458e-09	6.97199e-07	5.53419e-07	3134/3106/9111/3135/6737/84166/3105/3133/10062/11027/730249	11														Environmental Information Processing	Signal transduction	hsa04668	TNF signaling pathway	14/266	119/8848	1.22796e-05	0.00025423	0.000201933	64127/1326/3553/355/9020/6401/197259/1540/7124/4792/3383/1437/8837/4318	14		R-HSA-5654710	PI-3K cascade:FGFR3	3/171	18/11091	0.00247825	0.02671
GO:2001026	regulation of endothelial cell chemotaxis	5/263	24/18888	1.72447e-05	0.00111641	0.000930111	2246/7057/8823/8817/9037	5		GO:0002705	positive regulation of leukocyte mediated immunity	12/161	150/18888	6.09486e-09	6.97199e-07	5.53419e-07	3134/3106/3135/3553/117157/6891/3105/3133/567/3107/5336/54209	12		LumA-ceRM7												Human Diseases	Immune disease	hsa05330	Allograft rejection	8/266	38/8848	1.34163e-05	0.00025423	0.000201933	3134/3106/3135/355/3105/3133/7124/3107	8		R-HSA-375165	NCAM signaling for neurite out-growth	5/171	63/11091	0.00280702	0.0295958
GO:0060350	endochondral bone morphogenesis	7/263	60/18888	1.92798e-05	0.0012216	0.00101775	4882/4323/338773/4322/6474/8817/4325	7		GO:0002711	positive regulation of T cell mediated immunity	9/161	69/18888	6.94609e-09	7.29015e-07	5.78674e-07	3134/3106/3135/3553/6891/3105/3133/567/3107	9		category	subcategory	ID	Description	GeneRatio	BgRatio	pvalue	p.adjust	qvalue	geneID	Count		Environmental Information Processing	Signal transduction	hsa04064	NF-kappa B signaling pathway	13/266	105/8848	1.44408e-05	0.00025423	0.000201933	9560/29760/6366/3553/4067/9020/1540/115650/7124/4792/3383/4615/8837	13		R-HSA-5654706	FRS-mediated FGFR3 signaling	3/171	20/11091	0.00338488	0.0335034
GO:0090287	regulation of cellular response to growth factor stimulus	17/263	373/18888	2.03349e-05	0.00126161	0.00105108	9315/7041/2246/5654/3491/11117/64388/25960/9719/7057/8823/10468/7043/79652/8516/8817/26524	17		GO:0045088	regulation of innate immune response	19/161	440/18888	7.16249e-09	7.29015e-07	5.78674e-07	101/3134/340061/3106/9111/3135/5777/117157/6737/84166/3105/3133/348/10062/11027/730249/5336/54209/2358	19				hsa04820	Cytoskeleton in muscle cells	20/141	232/8848	6.03453e-10	1.14656e-07	9.90933e-08	284217/1292/4620/2199/2318/1291/3685/50509/633/2192/2273/7057/3908/4619/56776/3339/3693/8516/4634/9260	20		Human Diseases	Infectious disease: parasitic	hsa05144	Malaria	9/266	50/8848	1.48999e-05	0.00025423	0.000201933	2995/7097/3553/6401/7124/2532/3383/4615/6403	9		R-HSA-5654719	SHC-mediated cascade:FGFR4	3/171	20/11091	0.00338488	0.0335034
GO:0035988	chondrocyte proliferation	5/263	26/18888	2.60874e-05	0.00152659	0.00127185	4921/4882/4323/1490/4325	5		GO:0002706	regulation of lymphocyte mediated immunity	13/161	186/18888	7.20426e-09	7.29015e-07	5.78674e-07	3134/3106/3135/3553/5777/117157/6891/1379/3105/3133/567/3107/54209	13		Environmental Information Processing	Signaling molecules and interaction	hsa04512	ECM-receptor interaction	11/141	89/8848	1.43747e-07	1.36559e-05	1.18024e-05	284217/1292/1291/3685/7057/3908/3339/3912/3693/8516/63923	11		Organismal Systems	Development and regeneration	hsa04380	Osteoclast differentiation	15/266	142/8848	2.23171e-05	0.000358387	0.000284664	2534/7006/29760/3553/5533/799/9020/1540/2215/7124/4792/3455/11027/54/54209	15		R-HSA-5654720	PI-3K cascade:FGFR4	3/171	20/11091	0.00338488	0.0335034
GO:0048864	stem cell development	8/263	86/18888	2.63954e-05	0.00152659	0.00127185	10371/6591/5308/3084/8828/9037/9464/7291	8		GO:0001906	cell killing	14/161	226/18888	8.7962e-09	8.57141e-07	6.80377e-07	3134/57817/3106/3811/3135/5777/6891/1379/3105/3133/8542/567/3383/3107	14		Human Diseases	Cardiovascular disease	hsa05414	Dilated cardiomyopathy	11/141	105/8848	7.89203e-07	4.99828e-05	4.31985e-05	284217/781/7040/3685/3908/3693/7043/8516/4634/775/5350	11		Human Diseases	Infectious disease: parasitic	hsa05143	African trypanosomiasis	7/266	37/8848	9.74345e-05	0.00142967	0.00113558	3553/355/6401/7124/8542/3383/4615	7		R-HSA-5655253	Signaling by FGFR2 in disease	4/171	43/11091	0.00421482	0.0408838
GO:0051893	regulation of focal adhesion assembly	7/263	63/18888	2.66564e-05	0.00152659	0.00127185	1307/4323/79834/10395/7057/7070/10979	7		GO:0001914	regulation of T cell mediated cytotoxicity	8/161	50/18888	9.27176e-09	8.71215e-07	6.91548e-07	3134/3106/3135/6891/3105/3133/567/3107	8		Environmental Information Processing	Signal transduction	hsa04151	PI3K-Akt signaling pathway	20/141	362/8848	1.05233e-06	4.99858e-05	4.3201e-05	284217/1902/1292/3481/1291/2252/5156/2846/3685/2149/3082/7057/3908/8823/56034/3912/3693/8516/8817/63923	20		Organismal Systems	Immune system	hsa04620	Toll-like receptor signaling pathway	12/266	109/8848	9.95008e-05	0.00142967	0.00113558	10333/9560/7097/1326/414062/3553/7096/7124/4792/3455/4615/3663	12		R-HSA-5654712	FRS-mediated FGFR4 signaling	3/171	22/11091	0.0044705	0.041696
GO:0090109	regulation of cell-substrate junction assembly	7/263	63/18888	2.66564e-05	0.00152659	0.00127185	1307/4323/79834/10395/7057/7070/10979	7		GO:0002822	regulation of adaptive immune response based on somatic recombination of immune receptors built from immunoglobulin superfamily domains	13/161	192/18888	1.05614e-08	9.58177e-07	7.60576e-07	3134/3106/3135/3553/5777/2048/6891/1379/3105/3133/567/3107/54209	13		Human Diseases	Cardiovascular disease	hsa05410	Hypertrophic cardiomyopathy	10/141	99/8848	3.57042e-06	0.000126245	0.000109109	284217/781/7040/3685/3908/3693/7043/8516/4634/775	10		Human Diseases	Immune disease	hsa05340	Primary immunodeficiency	7/266	38/8848	0.000116406	0.00158895	0.00126209	326/3543/29760/6891/100/115650/6890	7		R-HSA-5655332	Signaling by FGFR3 in disease	3/171	22/11091	0.0044705	0.041696
GO:0033627	cell adhesion mediated by integrin	8/263	88/18888	3.12191e-05	0.00175416	0.00146144	1307/6591/11117/5054/1803/3693/8516/5328	8		GO:0050777	negative regulation of immune response	13/161	194/18888	1.19612e-08	1.049e-06	8.32666e-07	3134/3106/9111/3135/5777/6737/1379/84166/3105/3133/10062/730249/54209	13		Cellular Processes	Cellular community - eukaryotes	hsa04510	Focal adhesion	14/141	203/8848	3.98669e-06	0.000126245	0.000109109	284217/1292/1291/5156/3685/3082/7057/3908/56034/3912/3693/55742/8516/63923	14		Environmental Information Processing	Signal transduction	hsa04630	JAK-STAT signaling pathway	15/266	168/8848	0.000156116	0.00202951	0.00161203	3717/11009/3566/50616/3563/5777/133396/2688/64109/3588/246778/3568/3455/1437/5008	15		R-HSA-109704	PI3K Cascade	4/171	44/11091	0.00458145	0.0419246
GO:0002062	chondrocyte differentiation	9/263	116/18888	3.57494e-05	0.00197151	0.00164252	579/4882/6591/5745/11173/6474/359845/8817/1490	9		GO:0002708	positive regulation of lymphocyte mediated immunity	11/161	128/18888	1.26316e-08	1.07206e-06	8.50973e-07	3134/3106/3135/3553/117157/6891/3105/3133/567/3107/54209	11		Environmental Information Processing	Signal transduction	hsa04350	TGF-beta signaling pathway	9/141	108/8848	5.2702e-05	0.00143048	0.00123632	353500/2331/4681/7040/64388/7057/10468/7043/392255	9		Organismal Systems	Immune system	hsa04640	Hematopoietic cell lineage	11/266	99/8848	0.000178274	0.00221222	0.00175715	909/2323/2322/3566/3563/3553/933/7124/3568/1380/1437	11		R-HSA-5668914	Diseases of metabolism	10/171	250/11091	0.00535465	0.0480927
GO:0016485	protein processing	13/263	245/18888	4.17484e-05	0.00226048	0.00188327	4323/9935/2619/649/5054/715/7057/1803/85409/8532/5328/4325/4311	13		GO:0002696	positive regulation of leukocyte activation	17/161	362/18888	1.36998e-08	1.12638e-06	8.94092e-07	101/57817/23149/3135/3553/5777/2048/10385/3105/115650/970/3133/7293/567/283234/338339/54209	17		Human Diseases	Cardiovascular disease	hsa05412	Arrhythmogenic right ventricular cardiomyopathy	8/141	86/8848	6.3481e-05	0.00150767	0.00130303	284217/781/3685/3908/3693/8516/1000/775	8		Human Diseases	Cardiovascular disease	hsa05416	Viral myocarditis	9/266	69/8848	0.000204692	0.0024296	0.00192982	4625/3134/2534/3106/3135/3105/3133/3383/3107	9
GO:0150116	regulation of cell-substrate junction organization	7/263	68/18888	4.40259e-05	0.00231162	0.00192587	1307/4323/79834/10395/7057/7070/10979	7		GO:0002443	leukocyte mediated immunity	19/161	469/18888	1.99964e-08	1.5803e-06	1.2544e-06	3134/3106/3811/3135/3553/5777/117157/6891/57379/1379/3105/970/3133/567/3383/3107/202309/5336/54209	19		Human Diseases	Cancer: specific types	hsa05218	Melanoma	7/141	73/8848	0.000152357	0.00321643	0.00277985	4286/2252/5156/3082/8823/56034/8817	7		Organismal Systems	Immune system	hsa04662	B cell receptor signaling pathway	10/266	91/8848	0.000382974	0.00435633	0.0034602	29760/27071/5777/4067/5533/25780/933/4792/1380/11027	10		LumA-ceRM5
GO:0060537	muscle tissue development	18/263	438/18888	4.54904e-05	0.00231162	0.00192587	4882/4629/1291/3084/8913/2702/26508/5999/144165/6474/115701/5311/8516/5350/30008/7291/9242/80206	18		GO:0002702	positive regulation of production of molecular mediator of immune response	11/161	134/18888	2.0422e-08	1.5803e-06	1.2544e-06	3134/51237/3135/3553/2048/3105/3133/7293/567/3663/5336	11		Environmental Information Processing	Signal transduction	hsa04390	Hippo signaling pathway	10/141	157/8848	0.000195761	0.0034333	0.00296728	353500/122786/2736/6591/7040/5054/85409/7043/392255/1490	10		Human Diseases	Immune disease	hsa05323	Rheumatoid arthritis	10/266	94/8848	0.000497861	0.00543664	0.00431829	7097/526/414062/3553/1514/7124/3383/1437/3605/54	10		ID	Description	GeneRatio	BgRatio	pvalue	p.adjust
GO:0003171	atrioventricular valve development	5/263	29/18888	4.55162e-05	0.00231162	0.00192587	8642/3491/2702/26508/7291	5		GO:0050727	regulation of inflammatory response	18/161	425/18888	2.46467e-08	1.85272e-06	1.47065e-06	101/340061/57817/9111/199713/7114/3553/5777/6401/3133/348/7941/10062/730249/5008/5336/54209/2358	18		Environmental Information Processing	Signal transduction	hsa04020	Calcium signaling pathway	13/141	254/8848	0.00019877	0.0034333	0.00296728	3269/2252/5156/815/2149/3082/8823/8913/56034/8817/775/5350/3357	13		Human Diseases	Immune disease	hsa05321	Inflammatory bowel disease	8/266	65/8848	0.00068666	0.00720993	0.0057268	64127/7097/3566/50616/3553/4094/7124/3605	8		R-HSA-69620	Cell Cycle Checkpoints	85/262	292/11091	8.57909e-72	5.6622e-69
GO:1905314	semi-lunar valve development	6/263	47/18888	4.57977e-05	0.00231162	0.00192587	6591/11117/2702/26508/11096/7291	6		GO:0002460	adaptive immune response based on somatic recombination of immune receptors built from immunoglobulin superfamily domains	17/161	385/18888	3.3781e-08	2.45437e-06	1.94821e-06	3134/3106/3135/3553/5777/2048/6891/57379/1379/3105/970/3133/567/3383/3107/202309/54209	17		Organismal Systems	Digestive system	hsa04974	Protein digestion and absorption	8/141	105/8848	0.000258796	0.00409761	0.00354142	1292/1307/80781/1291/50509/1803/1305/4311	8		Human Diseases	Immune disease	hsa05320	Autoimmune thyroid disease	7/266	53/8848	0.000968292	0.00979051	0.00777654	3134/3106/3135/355/3105/3133/3107	7		R-HSA-68877	Mitotic Prometaphase	57/262	205/11091	5.13174e-46	1.69347e-43
GO:0014033	neural crest cell differentiation	8/263	93/18888	4.65927e-05	0.00231255	0.00192665	10371/6591/5308/3084/8828/9037/9464/7291	8		GO:0031341	regulation of cell killing	10/161	110/18888	3.4516e-08	2.45437e-06	1.94821e-06	3134/3106/3135/6891/1379/3105/3133/567/3383/3107	10		Cellular Processes	Cell motility	hsa04810	Regulation of actin cytoskeleton	12/141	230/8848	0.000295359	0.00431678	0.00373085	1902/2252/5156/2846/3685/2149/8823/56034/3693/8516/8817/6387	12		Human Diseases	Infectious disease: parasitic	hsa05142	Chagas disease	10/266	103/8848	0.00102543	0.00999796	0.00794131	10333/7097/414062/3553/355/7124/4792/4615/2771/8837	10		R-HSA-2500257	Resolution of Sister Chromatid Cohesion	47/262	127/11091	1.6643e-44	3.66146e-42
GO:1901888	regulation of cell junction assembly	12/263	215/18888	5.06155e-05	0.00247103	0.00205868	1307/84628/6591/4323/11178/8128/79834/10395/7057/7070/257194/10979	12		GO:0001913	T cell mediated cytotoxicity	8/161	60/18888	4.11114e-08	2.84642e-06	2.25942e-06	3134/3106/3135/6891/3105/3133/567/3107	8		Human Diseases	Cancer: overview	hsa05205	Proteoglycans in cancer	11/141	204/8848	0.000401199	0.00544484	0.00470579	3481/7040/3685/815/3082/7057/7078/3339/3693/7291/117581	11		Human Diseases	Infectious disease: viral	hsa05166	Human T-cell leukemia virus 1 infection	16/266	223/8848	0.00110538	0.0104058	0.00826525	3134/3106/3135/5533/9020/113/3105/115650/3133/7124/4792/2113/567/3383/3107/1437	16		R-HSA-68886	M Phase	73/262	417/11091	4.48116e-44	7.39392e-42
GO:0035767	endothelial cell chemotaxis	5/263	31/18888	6.36592e-05	0.0030577	0.00254745	2246/7057/8823/8817/9037	5		GO:0001909	leukocyte mediated cytotoxicity	11/161	144/18888	4.31766e-08	2.91276e-06	2.31208e-06	3134/3106/3811/3135/5777/6891/3105/3133/567/3383/3107	11		Environmental Information Processing	Signal transduction	hsa04015	Rap1 signaling pathway	11/141	212/8848	0.00055548	0.00703608	0.00608104	1902/5587/2252/5156/2846/2149/3082/7057/8823/56034/8817	11		Human Diseases	Cancer: overview	hsa05202	Transcriptional misregulation in cancer	14/266	193/8848	0.002016	0.0183456	0.0145718	51384/4353/5371/2322/51513/1053/4094/8013/4914/4066/1437/3087/4005/4318	14		R-HSA-2555396	Mitotic Metaphase and Anaphase	58/262	236/11091	1.80639e-43	2.38444e-41
GO:0003012	muscle system process	18/263	459/18888	8.28149e-05	0.00391001	0.00325753	781/4620/10398/59/4629/1291/1264/4619/8913/2702/3736/5999/800/5350/9464/7169/8082/25802	18		GO:0032102	negative regulation of response to external stimulus	18/161	456/18888	7.1605e-08	4.70982e-06	3.73853e-06	3134/57817/3106/9111/7114/3135/5777/6737/84166/3105/3133/79890/348/10062/11027/730249/54209/2358	18		Environmental Information Processing	Signaling molecules and interaction	hsa04080	Neuroactive ligand-receptor interaction	14/141	368/8848	0.00215303	0.0255672	0.0220969	2151/1902/3269/5745/100506013/2846/2149/1134/2561/2892/2922/5739/51289/3357	14		Human Diseases	Infectious disease: parasitic	hsa05140	Leishmaniasis	8/266	77/8848	0.00210016	0.0184718	0.014672	3717/7097/3553/5777/2215/7124/4792/4615	8		R-HSA-68882	Mitotic Anaphase	57/262	235/11091	2.35415e-42	2.58956e-40
GO:0034446	substrate adhesion-dependent cell spreading	8/263	101/18888	8.40297e-05	0.00391001	0.00325753	3915/55679/79834/2192/55742/8516/10979/3037	8		GO:0097028	dendritic cell differentiation	7/161	45/18888	9.91624e-08	6.36333e-06	5.05105e-06	3106/3135/116071/28959/55365/54209/55509	7		Environmental Information Processing	Signal transduction	hsa04010	MAPK signaling pathway	12/141	300/8848	0.00297055	0.0332003	0.0286939	781/3481/7040/2252/5156/3082/8823/8913/56034/7043/8817/775	12		Human Diseases	Cardiovascular disease	hsa05417	Lipid and atherosclerosis	15/266	216/8848	0.0021652	0.0184718	0.014672	10333/3717/7097/414062/3553/4067/355/5533/6401/7124/4792/3383/4615/4318/6403	15		R-HSA-141424	Amplification of signal from the kinetochores	40/262	96/11091	2.24363e-40	1.851e-38
GO:0097094	craniofacial suture morphogenesis	4/263	18/18888	9.6403e-05	0.00435888	0.0036315	4323/7043/7291/4325	4		GO:0002824	positive regulation of adaptive immune response based on somatic recombination of immune receptors built from immunoglobulin superfamily domains	10/161	125/18888	1.17026e-07	7.33087e-06	5.81906e-06	3134/3106/3135/3553/6891/3105/3133/567/3107/54209	10		Environmental Information Processing	Signaling molecules and interaction	hsa04514	Cell adhesion molecules	8/141	157/8848	0.00355	0.0374722	0.032386	84628/25945/3685/1272/8516/1000/83700/4267	8		Environmental Information Processing	Signaling molecules and interaction	hsa04514	Cell adhesion molecules	12/266	157/8848	0.00270062	0.0223415	0.0177457	3134/3384/3106/3135/933/6401/3105/3133/57863/3383/3107/6403	12		R-HSA-141444	Amplification of signal from unattached kinetochores via a MAD2 inhibitory signal	40/262	96/11091	2.24363e-40	1.851e-38
GO:0002685	regulation of leukocyte migration	12/263	230/18888	9.66039e-05	0.00435888	0.0036315	7499/4323/11117/5919/5054/7057/7070/1803/3554/79148/683/6387	12		GO:0001912	positive regulation of leukocyte mediated cytotoxicity	8/161	69/18888	1.25908e-07	7.70384e-06	6.11511e-06	3134/3106/3135/6891/3105/3133/567/3107	8		Human Diseases	Immune disease	hsa05323	Rheumatoid arthritis	6/141	94/8848	0.00380105	0.0380105	0.0328512	7040/4314/245972/8600/7043/6387	6		Cellular Processes	Transport and catabolism	hsa04144	Endocytosis	16/266	252/8848	0.00383388	0.0307838	0.0244514	5371/3134/64744/274/3106/3579/3135/9267/10109/3105/3133/116984/3107/7852/2869/30011	16		R-HSA-69618	Mitotic Spindle Checkpoint	42/262	112/11091	4.73343e-40	3.47118e-38
GO:0014902	myotube differentiation	9/263	133/18888	0.000103963	0.00462091	0.0038498	84814/4323/5738/1291/79365/338773/6474/30846/11096	9		GO:0001910	regulation of leukocyte mediated cytotoxicity	9/161	96/18888	1.30636e-07	7.81145e-06	6.20053e-06	3134/3106/3135/6891/3105/3133/567/3383/3107	9														Organismal Systems	Digestive system	hsa04979	Cholesterol metabolism	6/266	51/8848	0.004039	0.0315042	0.0250236	344/10577/3988/348/3990/1071	6		R-HSA-9648025	EML4 and NUDC in mitotic spindle formation	42/262	117/11091	4.16299e-39	2.74758e-37
GO:0035051	cardiocyte differentiation	10/263	165/18888	0.000108844	0.00469764	0.00391373	4629/5308/3084/5999/144165/6474/115701/9464/7291/80206	10		GO:0002709	regulation of T cell mediated immunity	9/161	99/18888	1.7066e-07	9.9779e-06	7.92021e-06	3134/3106/3135/3553/6891/3105/3133/567/3107	9		LumA-ceRM8												Organismal Systems	Digestive system	hsa04974	Protein digestion and absorption	9/266	105/8848	0.00424876	0.0322198	0.025592	4224/1310/10008/7512/6547/1286/486/131873/1285	9		R-HSA-453279	Mitotic G1 phase and G1/S transition	45/262	149/11091	5.08234e-38	3.0494e-36
GO:0051147	regulation of muscle cell differentiation	10/263	165/18888	0.000108844	0.00469764	0.00391373	284217/3915/84814/4323/3084/79365/338773/5999/6474/30008	10		GO:0002821	positive regulation of adaptive immune response	10/161	131/18888	1.8216e-07	1.04188e-05	8.27017e-06	3134/3106/3135/3553/6891/3105/3133/567/3107/54209	10		category	subcategory	ID	Description	GeneRatio	BgRatio	pvalue	p.adjust	qvalue	geneID	Count		Human Diseases	Cancer: overview	hsa05235	PD-L1 expression and PD-1 checkpoint pathway in cancer	8/266	90/8848	0.00553998	0.0408761	0.0324676	3717/7097/5777/5533/116071/4792/4615/55509	8		R-HSA-5663220	RHO GTPases Activate Formins	43/262	140/11091	1.09948e-36	6.04712e-35
GO:0010761	fibroblast migration	6/263	56/18888	0.000124731	0.0052425	0.00436767	4921/57124/79899/59/7057/7145	6		GO:0031343	positive regulation of cell killing	8/161	76/18888	2.69966e-07	1.51123e-05	1.19958e-05	3134/3106/3135/6891/3105/3133/567/3107	8		/	/	/	/	/	/	/	/	/	/	/		Cellular Processes	Transport and catabolism	hsa04142	Lysosome	10/266	132/8848	0.00635273	0.0456394	0.0362511	5660/1512/1514/10577/1522/4125/3988/5641/53/54	10		R-HSA-2467813	Separation of Sister Chromatids	48/262	190/11091	1.74748e-36	8.87185e-35
GO:0110053	regulation of actin filament organization	13/263	273/18888	0.000124989	0.0052425	0.00436767	1902/25959/10395/163782/5999/7043/10979/1490/9037/6387/55243/25802/80206	13		GO:0070661	leukocyte proliferation	15/161	352/18888	3.56113e-07	1.95195e-05	1.5494e-05	51237/5699/3135/3553/5777/2048/10385/3105/115650/970/3133/7293/202309/283234/54209	15																										R-HSA-69242	S Phase	45/262	162/11091	3.30024e-36	1.55583e-34
GO:1902903	regulation of supramolecular fiber organization	16/263	392/18888	0.000130338	0.00539094	0.00449134	1902/1291/25959/11117/10395/163782/5999/7043/10979/1490/9037/6387/55243/30008/25802/80206	16		GO:0002228	natural killer cell mediated immunity	8/161	79/18888	3.65533e-07	1.96269e-05	1.55793e-05	3134/3106/3811/3135/5777/117157/3105/3133	8		LumA-ceRM9																								R-HSA-69206	G1/S Transition	41/262	131/11091	2.29994e-35	1.01197e-33
GO:0001755	neural crest cell migration	6/263	57/18888	0.000137796	0.00558155	0.00465014	10371/5308/8828/9037/9464/7291	6		GO:0046651	lymphocyte proliferation	14/161	308/18888	4.11214e-07	2.16381e-05	1.71757e-05	51237/5699/3135/3553/5777/2048/10385/3105/115650/970/3133/7293/202309/283234	14		category	subcategory	ID	Description	GeneRatio	BgRatio	pvalue	p.adjust	qvalue	geneID	Count														R-HSA-69239	Synthesis of DNA	38/262	120/11091	5.08505e-33	2.09758e-31
GO:0097529	myeloid leukocyte migration	12/263	239/18888	0.000138695	0.00558155	0.00465014	7499/4323/11117/5919/5054/7057/1803/3554/79148/683/6387/4920	12		GO:0002720	positive regulation of cytokine production involved in immune response	8/161	81/18888	4.4421e-07	2.24922e-05	1.78537e-05	3134/3135/3553/3105/3133/567/3663/5336	8		Genetic Information Processing	Translation	hsa03010	Ribosome	76/87	172/8848	8.09698e-126	3.31976e-124	3.31976e-124	6147/6171/6169/6229/6133/6191/9045/6161/6167/6155/6137/6202/6210/6208/6122/6146/6218/6227/6168/6181/6176/6206/6160/6228/6224/6136/11224/6134/6207/25873/6157/6125/6141/6203/6135/200916/6144/6230/23521/6142/6234/6173/6201/6222/6164/6158/6204/6129/6205/6154/6223/6139/3921/6165/6124/6188/6156/6128/6189/4736/6159/6217/6187/6232/6194/6231/6152/6175/6193/6235/2197/6170/6138/6130/7311/6233	76														R-HSA-69190	DNA strand elongation	23/262	32/11091	3.39435e-31	1.3178e-29
GO:0006936	muscle contraction	15/263	355/18888	0.000145004	0.00575763	0.00479684	781/4620/10398/59/4629/1264/4619/8913/2702/3736/800/5350/7169/8082/25802	15		GO:0002440	production of molecular mediator of immune response	14/161	310/18888	4.44544e-07	2.24922e-05	1.78537e-05	3134/51237/29802/3135/3553/2048/57379/3105/3133/7293/567/202309/3663/5336	14		Human Diseases	Infectious disease: viral	hsa05171	Coronavirus disease - COVID-19	76/87	238/8848	1.99678e-112	4.0934e-111	4.0934e-111	6147/6171/6169/6229/6133/6191/9045/6161/6167/6155/6137/6202/6210/6208/6122/6146/6218/6227/6168/6181/6176/6206/6160/6228/6224/6136/11224/6134/6207/25873/6157/6125/6141/6203/6135/200916/6144/6230/23521/6142/6234/6173/6201/6222/6164/6158/6204/6129/6205/6154/6223/6139/3921/6165/6124/6188/6156/6128/6189/4736/6159/6217/6187/6232/6194/6231/6152/6175/6193/6235/2197/6170/6138/6130/7311/6233	76														R-HSA-68962	Activation of the pre-replicative complex	23/262	33/11091	1.09694e-30	4.02213e-29
GO:0072132	mesenchyme morphogenesis	6/263	58/18888	0.000151922	0.00595294	0.00495956	8642/59/6591/26508/11096/7291	6		GO:0002707	negative regulation of lymphocyte mediated immunity	7/161	57/18888	5.30289e-07	2.62489e-05	2.08357e-05	3134/3106/3135/5777/1379/3105/3133	7																										R-HSA-69481	G2/M Checkpoints	40/262	167/11091	1.94999e-29	6.77364e-28
GO:0090497	mesenchymal cell migration	6/263	59/18888	0.00016717	0.00646535	0.00538646	10371/5308/8828/9037/9464/7291	6		GO:0032943	mononuclear cell proliferation	14/161	315/18888	5.38746e-07	2.62489e-05	2.08357e-05	51237/5699/3135/3553/5777/2048/10385/3105/115650/970/3133/7293/202309/283234	14																										R-HSA-176187	Activation of ATR in response to replication stress	23/262	37/11091	6.65645e-29	2.19663e-27
GO:0003180	aortic valve morphogenesis	5/263	38/18888	0.000173692	0.00663149	0.00552487	6591/11117/26508/11096/7291	5		GO:0045953	negative regulation of natural killer cell mediated cytotoxicity	5/161	20/18888	5.91138e-07	2.82779e-05	2.24463e-05	3134/3106/3135/3105/3133	5																										R-HSA-69306	DNA Replication	41/262	186/11091	1.28656e-28	4.04349e-27
GO:2001044	regulation of integrin-mediated signaling pathway	4/263	21/18888	0.000182453	0.00669623	0.00557881	284217/3915/55679/683	4		GO:0002700	regulation of production of molecular mediator of immune response	11/161	187/18888	6.12373e-07	2.87706e-05	2.28374e-05	3134/51237/3135/3553/2048/3105/3133/7293/567/3663/5336	11																										R-HSA-73894	DNA Repair	51/262	335/11091	2.03323e-27	6.09968e-26
GO:0048041	focal adhesion assembly	7/263	85/18888	0.000183403	0.00669623	0.00557881	1307/4323/79834/10395/7057/7070/10979	7		GO:1903039	positive regulation of leukocyte cell-cell adhesion	13/161	277/18888	7.56955e-07	3.49395e-05	2.77341e-05	101/23149/3135/3553/5777/10385/6401/3105/115650/970/3133/567/283234	13																										R-HSA-195258	RHO GTPase Effectors	48/262	326/11091	3.87805e-25	1.11283e-23
GO:1905517	macrophage migration	6/263	60/18888	0.000183602	0.00669623	0.00557881	4323/11117/5919/7057/79148/4920	6		GO:0002716	negative regulation of natural killer cell mediated immunity	5/161	21/18888	7.70539e-07	3.49533e-05	2.7745e-05	3134/3106/3135/3105/3133	5																										R-HSA-5693538	Homology Directed Repair	33/262	140/11091	3.8147e-24	1.00708e-22
GO:0070252	actin-mediated cell contraction	8/263	113/18888	0.000184383	0.00669623	0.00557881	781/4620/122786/59/8913/2702/55742/5350	8		GO:0051251	positive regulation of lymphocyte activation	14/161	328/18888	8.7307e-07	3.8933e-05	3.0904e-05	101/23149/3135/3553/5777/2048/10385/3105/115650/970/3133/7293/567/283234	14																										R-HSA-73886	Chromosome Maintenance	33/262	140/11091	3.8147e-24	1.00708e-22
GO:0010634	positive regulation of epithelial cell migration	10/263	177/18888	0.000193597	0.00694617	0.00578704	2246/54453/2252/25960/7057/8823/8828/8817/9037/3037	10		GO:0050670	regulation of lymphocyte proliferation	12/161	237/18888	9.2409e-07	4.05213e-05	3.21648e-05	51237/3135/3553/5777/2048/10385/3105/115650/970/3133/7293/283234	12																										R-HSA-5693532	DNA Double-Strand Break Repair	35/262	170/11091	1.93209e-23	4.90454e-22
GO:0034329	cell junction assembly	17/263	453/18888	0.00021953	0.00771811	0.00643017	3915/1307/84628/6591/2706/4323/11178/8128/79834/10395/7057/7070/2702/257194/2561/10979/7145	17		GO:0032944	regulation of mononuclear cell proliferation	12/161	241/18888	1.10232e-06	4.75445e-05	3.77396e-05	51237/3135/3553/5777/2048/10385/3105/115650/970/3133/7293/283234	12																										R-HSA-5693567	HDR through Homologous Recombination (HRR) or Single Strand Annealing (SSA)	31/262	134/11091	1.82011e-22	4.44917e-21
GO:0031214	biomineral tissue development	10/263	180/18888	0.000221833	0.00771811	0.00643017	4921/5745/1291/3491/338773/4322/144165/359845/7291/4920	10		GO:0001819	positive regulation of cytokine production	17/161	500/18888	1.34804e-06	5.72047e-05	4.54076e-05	23601/101/3134/340061/3135/3553/2048/3105/3133/3162/567/283234/11027/5008/3663/5336/54209	17																										R-HSA-5685942	HDR through Homologous Recombination (HRR)	24/262	70/11091	4.23447e-22	9.98126e-21
GO:0031032	actomyosin structure organization	11/263	215/18888	0.000222887	0.00771811	0.00643017	1902/10398/4629/1264/10395/3693/7043/10979/1490/25802/80206	11		GO:0002704	negative regulation of leukocyte mediated immunity	7/161	68/18888	1.7977e-06	7.50752e-05	5.95928e-05	3134/3106/3135/5777/1379/3105/3133	7																										R-HSA-176974	Unwinding of DNA	12/262	12/11091	2.35241e-20	5.35376e-19
GO:0048568	embryonic organ development	17/263	455/18888	0.000231133	0.00791166	0.00659142	579/80781/4323/9935/5308/3491/5919/144165/6474/5311/4237/7043/8516/9645/9464/7291/4325	17		GO:0050870	positive regulation of T cell activation	12/161	253/18888	1.83344e-06	7.53716e-05	5.98281e-05	101/23149/3135/3553/5777/10385/3105/115650/970/3133/567/283234	12																										R-HSA-69205	G1/S-Specific Transcription	16/262	28/11091	1.40639e-19	3.09407e-18
GO:0003203	endocardial cushion morphogenesis	5/263	41/18888	0.000250653	0.00848231	0.00706685	8642/6591/26508/11096/7291	5		GO:0042098	T cell proliferation	11/161	213/18888	2.2013e-06	8.91018e-05	7.07268e-05	5699/3135/3553/5777/10385/3105/115650/970/3133/7293/283234	11																										R-HSA-9675135	Diseases of DNA repair	19/262	51/11091	1.59229e-18	3.39004e-17
GO:0021545	cranial nerve development	6/263	64/18888	0.000262498	0.00868607	0.0072366	10371/1902/4882/9935/8828/3736	6		GO:0001911	negative regulation of leukocyte mediated cytotoxicity	5/161	26/18888	2.4065e-06	9.5932e-05	7.61484e-05	3134/3106/3135/3105/3133	5																										R-HSA-5693579	Homologous DNA Pairing and Strand Exchange	17/262	43/11091	3.21805e-17	6.63724e-16
GO:0010975	regulation of neuron projection development	17/263	460/18888	0.000262507	0.00868607	0.0072366	7025/4921/10371/1902/84628/11178/8499/7070/163404/6474/22891/257194/9037/6387/79625/5793/4920	17		GO:0045089	positive regulation of innate immune response	14/161	365/18888	3.06048e-06	0.000120181	9.53967e-05	101/3134/340061/9111/3135/117157/84166/3133/10062/11027/730249/5336/54209/2358	14																										R-HSA-453274	Mitotic G2-G2/M phases	31/262	199/11091	3.69454e-17	7.38908e-16
GO:0001649	osteoblast differentiation	12/263	257/18888	0.000271384	0.00879499	0.00732735	4921/9902/6591/5745/1291/3491/338773/6474/10979/9464/7291/117581	12		GO:0070663	regulation of leukocyte proliferation	12/161	267/18888	3.2035e-06	0.000123947	9.8386e-05	51237/3135/3553/5777/2048/10385/3105/115650/970/3133/7293/283234	12																										R-HSA-5693616	Presynaptic phase of homologous DNA pairing and strand exchange	16/262	40/11091	2.25486e-16	4.37707e-15
GO:0060541	respiratory system development	11/263	220/18888	0.000271706	0.00879499	0.00732735	284217/2246/4323/1291/2252/9719/7043/8817/1490/9242/4311	11		GO:2001198	regulation of dendritic cell differentiation	4/161	13/18888	3.42485e-06	0.000130591	0.00010366	3106/3135/28959/55365	4																										R-HSA-69275	G2/M Transition	30/262	197/11091	2.35177e-16	4.43478e-15
GO:0002691	regulation of cellular extravasation	5/263	42/18888	0.00028132	0.00900829	0.00750505	7499/7070/3554/683/6387	5		GO:0042267	natural killer cell mediated cytotoxicity	7/161	76/18888	3.82925e-06	0.000143925	0.000114244	3134/3106/3811/3135/5777/3105/3133	7																										R-HSA-9675136	Diseases of DNA Double-Strand Break Repair	16/262	41/11091	3.62064e-16	6.45844e-15
GO:0090303	positive regulation of wound healing	6/263	65/18888	0.000285862	0.0090531	0.00754238	4921/11117/5054/7057/10979/5328	6		GO:1903131	mononuclear cell differentiation	16/161	484/18888	4.01859e-06	0.000148914	0.000118204	7471/101/3106/3135/3553/5777/57379/10385/116071/28959/567/338339/55365/5336/54209/55509	16																										R-HSA-9701190	Defective homologous recombination repair (HRR) due to BRCA2 loss of function	16/262	41/11091	3.62064e-16	6.45844e-15
GO:0003253	cardiac neural crest cell migration involved in outflow tract morphogenesis	3/263	10/18888	0.000297919	0.0090531	0.00754238	5308/9464/7291	3		GO:0031342	negative regulation of cell killing	5/161	29/18888	4.25574e-06	0.000155512	0.000123441	3134/3106/3135/3105/3133	5																										R-HSA-180786	Extension of Telomeres	17/262	51/11091	9.53111e-16	1.6554e-14
GO:0035768	endothelial cell chemotaxis to fibroblast growth factor	3/263	10/18888	0.000297919	0.0090531	0.00754238	2246/8823/8817	3		GO:0022409	positive regulation of cell-cell adhesion	13/161	325/18888	4.43931e-06	0.000159997	0.000127002	101/23149/3135/3553/5777/10385/6401/3105/115650/970/3133/567/283234	13																										R-HSA-69002	DNA Replication Pre-Initiation	26/262	158/11091	3.81854e-15	6.46214e-14
GO:0048251	elastic fiber assembly	3/263	10/18888	0.000297919	0.0090531	0.00754238	4629/11117/30008	3		GO:0002715	regulation of natural killer cell mediated immunity	6/161	53/18888	5.75966e-06	0.000202049	0.000160381	3134/3106/3135/117157/3105/3133	6																										R-HSA-3700989	Transcriptional Regulation by TP53	38/262	362/11091	6.12131e-15	1.01002e-13
GO:2000544	regulation of endothelial cell chemotaxis to fibroblast growth factor	3/263	10/18888	0.000297919	0.0090531	0.00754238	2246/8823/8817	3		GO:0071825	protein-lipid complex organization	6/161	53/18888	5.75966e-06	0.000202049	0.000160381	274/341/348/5360/7941/1071	6																										R-HSA-1538133	G0 and Early G1	13/262	27/11091	7.92547e-15	1.27581e-13
GO:0001837	epithelial to mesenchymal transition	10/263	187/18888	0.000301397	0.00906627	0.00755336	147906/7041/6591/26508/359845/7043/10979/23187/7291/3037	10		GO:0046348	amino sugar catabolic process	4/161	15/18888	6.45185e-06	0.000223353	0.000177292	216/5973/4245/1118	4																										R-HSA-9709570	Impaired BRCA2 binding to RAD51	14/262	35/11091	1.77664e-14	2.79186e-13
GO:0016055	Wnt signaling pathway	17/263	466/18888	0.000304992	0.00908266	0.00756701	147906/7041/6591/3090/1291/4286/388336/25960/85409/144165/115701/5311/10979/9037/26524/8532/4920	17		GO:0002833	positive regulation of response to biotic stimulus	14/161	390/18888	6.54926e-06	0.000223781	0.000177631	101/3134/340061/9111/3135/117157/84166/3133/10062/11027/730249/5336/54209/2358	14																										R-HSA-69052	Switching of origins to a post-replicative state	20/262	91/11091	2.07333e-14	3.18232e-13
GO:0070613	regulation of protein processing	6/263	66/18888	0.000310827	0.00916477	0.00763542	4323/2619/5054/7057/85409/5328	6		GO:0034368	protein-lipid complex remodeling	5/161	33/18888	8.27435e-06	0.000275567	0.000218738	341/348/5360/7941/1071	5																										R-HSA-5693568	Resolution of D-loop Structures through Holliday Junction Intermediates	14/262	36/11091	2.84649e-14	4.26974e-13
GO:0003176	aortic valve development	5/263	43/18888	0.000314751	0.0091895	0.00765602	6591/11117/26508/11096/7291	5		GO:0034369	plasma lipoprotein particle remodeling	5/161	33/18888	8.27435e-06	0.000275567	0.000218738	341/348/5360/7941/1071	5																										R-HSA-5693537	Resolution of D-Loop Structures	14/262	37/11091	4.48348e-14	6.57578e-13
GO:0198738	cell-cell signaling by wnt	17/263	468/18888	0.000320421	0.00926423	0.00771828	147906/7041/6591/3090/1291/4286/388336/25960/85409/144165/115701/5311/10979/9037/26524/8532/4920	17		GO:0002718	regulation of cytokine production involved in immune response	8/161	120/18888	8.76467e-06	0.000288248	0.000228804	3134/3135/3553/3105/3133/567/3663/5336	8																										R-HSA-5693607	Processing of DNA double-strand break ends	20/262	97/11091	7.61417e-14	1.09247e-12
GO:0090130	tissue migration	15/263	383/18888	0.000327849	0.00938782	0.00782125	2246/59/6591/54453/2252/25959/25960/7057/1803/8823/8828/8817/9037/3037/5793	15		GO:0002367	cytokine production involved in immune response	8/161	122/18888	9.90043e-06	0.000321581	0.000255262	3134/3135/3553/3105/3133/567/3663/5336	8																										R-HSA-69273	Cyclin A/B1/B2 associated events during G2/M transition	12/262	25/11091	9.30534e-14	1.30671e-12
GO:0071774	response to fibroblast growth factor	8/263	124/18888	0.000347957	0.00979331	0.00815907	2246/4882/2252/7057/8823/8817/1490/79625	8		GO:0034375	high-density lipoprotein particle remodeling	4/161	17/18888	1.11006e-05	0.000356168	0.000282717	341/348/5360/1071	4																										R-HSA-69186	Lagging Strand Synthesis	11/262	20/11091	1.44407e-13	1.95881e-12
GO:1905521	regulation of macrophage migration	5/263	44/18888	0.000351107	0.00979331	0.00815907	4323/11117/5919/7057/79148	5		GO:0097006	regulation of plasma lipoprotein particle levels	7/161	91/18888	1.27406e-05	0.000403259	0.000320097	341/348/5360/3162/7941/1071/54209	7																										R-HSA-6791312	TP53 Regulates Transcription of Cell Cycle Genes	15/262	48/11091	1.45427e-13	1.95881e-12
GO:0032956	regulation of actin cytoskeleton organization	14/263	344/18888	0.000351875	0.00979331	0.00815907	1902/25959/10395/163782/5999/683/7043/10979/1490/9037/6387/55243/25802/80206	14		GO:0034367	protein-containing complex remodeling	5/161	36/18888	1.28749e-05	0.000403259	0.000320097	341/348/5360/7941/1071	5																										R-HSA-174417	Telomere C-strand (Lagging Strand) Synthesis	13/262	34/11091	3.16359e-13	4.09448e-12
GO:0014706	striated muscle tissue development	12/263	265/18888	0.0003584	0.00988254	0.00823341	4629/3084/8913/2702/5999/144165/6474/115701/5350/7291/9242/80206	12		GO:0002768	immune response-regulating cell surface receptor signaling pathway	13/161	360/18888	1.33016e-05	0.000411725	0.000326817	9111/23149/3135/5777/10385/3105/10062/338339/11027/730249/5336/54209/2358	13																										R-HSA-6804756	Regulation of TP53 Activity through Phosphorylation	19/262	92/11091	3.164e-13	4.09448e-12
GO:0032331	negative regulation of chondrocyte differentiation	4/263	25/18888	0.000369117	0.0100847	0.00840183	579/6591/11173/359845	4		GO:0070372	regulation of ERK1 and ERK2 cascade	12/161	308/18888	1.36342e-05	0.000417113	0.000331093	3553/5777/2048/6368/10385/348/3383/8837/6362/151306/54209/2358	12																										R-HSA-156711	Polo-like kinase mediated events	10/262	16/11091	3.22595e-13	4.09448e-12
GO:0030324	lung development	10/263	193/18888	0.000387388	0.0104876	0.00873754	284217/2246/4323/1291/2252/9719/7043/8817/1490/4311	10		GO:0007159	leukocyte cell-cell adhesion	14/161	419/18888	1.46966e-05	0.000444447	0.000352791	101/23149/3135/3553/5777/10385/6401/3105/115650/970/3133/567/3383/283234	14																										R-HSA-69473	G2/M DNA damage checkpoint	19/262	94/11091	4.77764e-13	5.94952e-12
GO:0035766	cell chemotaxis to fibroblast growth factor	3/263	11/18888	0.000405429	0.0106847	0.00890168	2246/8823/8817	3		GO:0002237	response to molecule of bacterial origin	13/161	369/18888	1.72608e-05	0.000516058	0.000409634	199713/3553/2048/6891/57379/6401/567/10062/11027/730249/3663/5336/54209	13																										R-HSA-5685938	HDR through Single Strand Annealing (SSA)	13/262	37/11091	1.14006e-12	1.3934e-11
GO:0110011	regulation of basement membrane organization	3/263	11/18888	0.000405429	0.0106847	0.00890168	284217/3915/23187	3		GO:0032373	positive regulation of sterol transport	5/161	39/18888	1.92617e-05	0.000563084	0.000446962	348/5360/10062/1071/54209	5																										R-HSA-69091	Polymerase switching	9/262	14/11091	3.60952e-12	4.25408e-11
GO:1904847	regulation of cell chemotaxis to fibroblast growth factor	3/263	11/18888	0.000405429	0.0106847	0.00890168	2246/8823/8817	3		GO:0032376	positive regulation of cholesterol transport	5/161	39/18888	1.92617e-05	0.000563084	0.000446962	348/5360/10062/1071/54209	5																										R-HSA-69109	Leading Strand Synthesis	9/262	14/11091	3.60952e-12	4.25408e-11
GO:0021675	nerve development	7/263	97/18888	0.000414451	0.0107325	0.00894153	10371/1902/4882/9935/8828/3736/2561	7		GO:0002478	antigen processing and presentation of exogenous peptide antigen	5/161	41/18888	2.47286e-05	0.000701554	0.000556876	3134/6891/3105/3133/567	5																										R-HSA-983189	Kinesins	15/262	59/11091	4.20651e-12	4.87069e-11
GO:0051153	regulation of striated muscle cell differentiation	7/263	97/18888	0.000414451	0.0107325	0.00894153	84814/4323/3084/79365/338773/5999/6474	7		GO:1900016	negative regulation of cytokine production involved in inflammatory response	5/161	41/18888	2.47286e-05	0.000701554	0.000556876	199713/2048/113/7850/54209	5																										R-HSA-174143	APC/C-mediated degradation of cell cycle proteins	17/262	87/11091	1.49168e-11	1.66866e-10
GO:1903317	regulation of protein maturation	6/263	70/18888	0.000428249	0.0109826	0.00914992	4323/2619/5054/7057/85409/5328	6		GO:1903037	regulation of leukocyte cell-cell adhesion	13/161	382/18888	2.47984e-05	0.000701554	0.000556876	101/23149/3135/3553/5777/10385/6401/3105/115650/970/3133/567/283234	13																										R-HSA-453276	Regulation of mitotic cell cycle	17/262	87/11091	1.49168e-11	1.66866e-10
GO:0003181	atrioventricular valve morphogenesis	4/263	26/18888	0.000431486	0.0109826	0.00914992	8642/3491/26508/7291	4		GO:0042129	regulation of T cell proliferation	9/161	181/18888	2.55573e-05	0.000715333	0.000567813	3135/3553/5777/10385/3105/115650/970/3133/283234	9																										R-HSA-113510	E2F mediated regulation of DNA replication	10/262	22/11091	2.29831e-11	2.52814e-10
GO:0030323	respiratory tube development	10/263	197/18888	0.000455369	0.0114923	0.00957453	284217/2246/4323/1291/2252/9719/7043/8817/1490/4311	10		GO:0070371	ERK1 and ERK2 cascade	12/161	332/18888	2.86032e-05	0.000792157	0.000628794	3553/5777/2048/6368/10385/348/3383/8837/6362/151306/54209/2358	12																										R-HSA-9709603	Impaired BRCA2 binding to PALB2	10/262	24/11091	6.68579e-11	7.2338e-10
GO:0010830	regulation of myotube differentiation	5/263	47/18888	0.000479375	0.0118454	0.00986874	84814/4323/79365/338773/6474	5		GO:0050671	positive regulation of lymphocyte proliferation	8/161	143/18888	3.14172e-05	0.000861028	0.000683462	3553/2048/3105/115650/970/3133/7293/283234	8																										R-HSA-68949	Orc1 removal from chromatin	15/262	71/11091	7.48522e-11	7.96814e-10
GO:0050919	negative chemotaxis	5/263	47/18888	0.000479375	0.0118454	0.00986874	10371/3084/1803/8828/9037	5		GO:0050900	leukocyte migration	13/161	396/18888	3.60042e-05	0.000976567	0.000775174	64805/101/3553/6368/6401/79890/3162/3383/7941/7852/6362/54209/2358	13																										R-HSA-9701192	Defective homologous recombination repair (HRR) due to BRCA1 loss of function	10/262	25/11091	1.09129e-10	1.0912e-09
GO:0045785	positive regulation of cell adhesion	17/263	485/18888	0.000481295	0.0118454	0.00986874	284217/3915/1307/2199/55679/54453/3491/11117/7070/1803/10085/9265/10979/6387/79625/30008/3037	17		GO:0032946	positive regulation of mononuclear cell proliferation	8/161	146/18888	3.64553e-05	0.000978712	0.000776877	3553/2048/3105/115650/970/3133/7293/283234	8																										R-HSA-9701193	Defective homologous recombination repair (HRR) due to PALB2 loss of function	10/262	25/11091	1.09129e-10	1.0912e-09
GO:0042730	fibrinolysis	4/263	27/18888	0.000501022	0.0120813	0.0100653	710/5054/7057/5328	4		GO:0006869	lipid transport	14/161	456/18888	3.73128e-05	0.000991615	0.000787119	5660/341/3553/79895/8542/348/5360/2760/10062/80833/5305/1071/54209/23780	14																										R-HSA-9704331	Defective HDR through Homologous Recombination Repair (HRR) due to PALB2 loss of BRCA1 binding function	10/262	25/11091	1.09129e-10	1.0912e-09
GO:0048745	smooth muscle tissue development	4/263	27/18888	0.000501022	0.0120813	0.0100653	4882/5311/8516/30008	4		GO:0033344	cholesterol efflux	6/161	74/18888	4.01081e-05	0.00105524	0.000837627	341/348/5360/10062/1071/54209	6																										R-HSA-9704646	Defective HDR through Homologous Recombination Repair (HRR) due to PALB2 loss of BRCA2/RAD51/RAD51C binding function	10/262	25/11091	1.09129e-10	1.0912e-09
GO:0010595	positive regulation of endothelial cell migration	8/263	131/18888	0.00050305	0.0120813	0.0100653	2246/54453/25960/7057/8823/8828/8817/9037	8		GO:0002274	myeloid leukocyte activation	10/161	241/18888	4.27786e-05	0.00111436	0.000884552	57817/9111/5777/116071/10062/338339/11027/5336/54209/55509	10																										R-HSA-157579	Telomere Maintenance	18/262	112/11091	1.14046e-10	1.0912e-09
GO:0032964	collagen biosynthetic process	5/263	48/18888	0.0005291	0.0125456	0.0104521	4921/5118/11117/9697/7043	5		GO:0002920	regulation of humoral immune response	5/161	46/18888	4.37056e-05	0.00112735	0.000894859	3553/5777/1379/730249/54209	5																										R-HSA-606279	Deposition of new CENPA-containing nucleosomes at the centromere	15/262	73/11091	1.1408e-10	1.0912e-09
GO:0061309	cardiac neural crest cell development involved in outflow tract morphogenesis	3/263	12/18888	0.000535019	0.0125456	0.0104521	5308/9464/7291	3		GO:0050729	positive regulation of inflammatory response	8/161	153/18888	5.08858e-05	0.00129981	0.00103176	101/9111/3553/3133/7941/5008/5336/54209	8																										R-HSA-774815	Nucleosome assembly	15/262	73/11091	1.1408e-10	1.0912e-09
GO:2001046	positive regulation of integrin-mediated signaling pathway	3/263	12/18888	0.000535019	0.0125456	0.0104521	284217/3915/55679	3		GO:0002366	leukocyte activation involved in immune response	11/161	301/18888	5.62084e-05	0.00142196	0.00112872	3134/9111/5777/117157/57379/3383/202309/338339/11027/5336/54209	11																										R-HSA-174411	Polymerase switching on the C-strand of the telomere	10/262	26/11091	1.73674e-10	1.6375e-09
GO:0048565	digestive tract development	8/263	133/18888	0.000556389	0.0129447	0.0107846	579/79827/8642/4882/5919/6474/56034/7043	8		GO:0042269	regulation of natural killer cell mediated cytotoxicity	5/161	49/18888	5.95609e-05	0.00149243	0.00118465	3134/3106/3135/3105/3133	5																										R-HSA-5693554	Resolution of D-loop Structures through Synthesis-Dependent Strand Annealing (SDSA)	10/262	27/11091	2.70141e-10	2.51117e-09
GO:0003416	endochondral bone growth	4/263	28/18888	0.000578176	0.0131436	0.0109503	4921/2121/4882/4322	4		GO:0002534	cytokine production involved in inflammatory response	6/161	80/18888	6.23821e-05	0.0015339	0.00121757	122618/199713/2048/113/7850/54209	6																										R-HSA-5633007	Regulation of TP53 Activity	20/262	160/11091	1.06446e-09	9.75753e-09
GO:0030194	positive regulation of blood coagulation	4/263	28/18888	0.000578176	0.0131436	0.0109503	11117/5054/7057/5328	4		GO:1900015	regulation of cytokine production involved in inflammatory response	6/161	80/18888	6.23821e-05	0.0015339	0.00121757	122618/199713/2048/113/7850/54209	6																										R-HSA-2514853	Condensation of Prometaphase Chromosomes	7/262	11/11091	1.15408e-09	1.04341e-08
GO:1900048	positive regulation of hemostasis	4/263	28/18888	0.000578176	0.0131436	0.0109503	11117/5054/7057/5328	4		GO:0002263	cell activation involved in immune response	11/161	305/18888	6.32818e-05	0.00154161	0.00122369	3134/9111/5777/117157/57379/3383/202309/338339/11027/5336/54209	11																										R-HSA-6811434	COPI-dependent Golgi-to-ER retrograde traffic	15/262	99/11091	9.75501e-09	8.70041e-08
GO:0003205	cardiac chamber development	9/263	168/18888	0.000592646	0.0133705	0.0111393	3084/3491/57167/8828/2702/26508/6474/55742/9464	9		GO:0019884	antigen processing and presentation of exogenous antigen	5/161	50/18888	6.57264e-05	0.00157206	0.00124786	3134/6891/3105/3133/567	5																										R-HSA-6804116	TP53 Regulates Transcription of Genes Involved in G1 Cell Cycle Arrest	7/262	14/11091	1.12929e-08	9.80703e-08
GO:0055001	muscle cell development	10/263	204/18888	0.000598127	0.0133927	0.0111578	10398/4629/1291/5999/144165/6474/115701/30008/25802/80206	10		GO:0071827	plasma lipoprotein particle organization	5/161	50/18888	6.57264e-05	0.00157206	0.00124786	341/348/5360/7941/1071	5																										R-HSA-69166	Removal of the Flap Intermediate	7/262	14/11091	1.12929e-08	9.80703e-08
GO:0060326	cell chemotaxis	13/263	322/18888	0.000612959	0.0136223	0.0113491	1902/2246/5919/5054/7057/1803/8823/79148/683/55742/8817/9037/6387	13		GO:0045785	positive regulation of cell adhesion	14/161	485/18888	7.24071e-05	0.00171624	0.00136231	64805/101/23149/3135/3553/5777/10385/6401/3105/115650/970/3133/567/283234	14																										R-HSA-5651801	PCNA-Dependent Long Patch Base Excision Repair	8/262	21/11091	1.3594e-08	1.1652e-07
GO:0001763	morphogenesis of a branching structure	10/263	206/18888	0.000645114	0.0142307	0.011856	284217/9955/2246/8642/6591/4323/57471/2252/6474/5311	10		GO:0007249	canonical NF-kappaB signal transduction	11/161	311/18888	7.53202e-05	0.00175538	0.00139338	101/6275/7114/3553/6737/3162/338339/80833/8837/5336/54209	11																										R-HSA-110314	Recognition of DNA damage by PCNA-containing replication complex	9/262	30/11091	1.8515e-08	1.56665e-07
GO:0003174	mitral valve development	3/263	13/18888	0.000688386	0.0149636	0.0124666	8642/2702/7291	3		GO:0010875	positive regulation of cholesterol efflux	4/161	27/18888	7.65928e-05	0.00175538	0.00139338	348/5360/10062/54209	4																										R-HSA-6783310	Fanconi Anemia Pathway	10/262	40/11091	2.07009e-08	1.71177e-07
GO:0051918	negative regulation of fibrinolysis	3/263	13/18888	0.000688386	0.0149636	0.0124666	5054/7057/5328	3		GO:0032371	regulation of sterol transport	6/161	83/18888	7.6727e-05	0.00175538	0.00139338	341/348/5360/10062/1071/54209	6																										R-HSA-69183	Processive synthesis on the lagging strand	7/262	15/11091	2.07488e-08	1.71177e-07
GO:0030048	actin filament-based movement	8/263	138/18888	0.000709965	0.0153208	0.0127642	781/4620/122786/59/8913/2702/55742/5350	8		GO:0032374	regulation of cholesterol transport	6/161	83/18888	7.6727e-05	0.00175538	0.00139338	341/348/5360/10062/1071/54209	6																										R-HSA-110373	Resolution of AP sites via the multiple-nucleotide patch replacement pathway	8/262	26/11091	9.41881e-08	7.67458e-07
GO:0048738	cardiac muscle tissue development	11/263	248/18888	0.000743526	0.0158789	0.0132292	4629/3084/8913/2702/5999/144165/6474/115701/5350/9242/80206	11		GO:0002698	negative regulation of immune effector process	7/161	121/18888	8.02998e-05	0.00182128	0.00144569	3134/3106/3135/5777/1379/3105/3133	7																										R-HSA-8854518	AURKA Activation by TPX2	12/262	73/11091	1.20007e-07	9.65912e-07
GO:0010955	negative regulation of protein processing	4/263	30/18888	0.000757156	0.0158789	0.0132292	2619/5054/7057/5328	4		GO:0070665	positive regulation of leukocyte proliferation	8/161	164/18888	8.29966e-05	0.00186636	0.00148147	3553/2048/3105/115650/970/3133/7293/283234	8																										R-HSA-2565942	Regulation of PLK1 Activity at G2/M Transition	13/262	88/11091	1.31278e-07	1.0439e-06
GO:0050820	positive regulation of coagulation	4/263	30/18888	0.000757156	0.0158789	0.0132292	11117/5054/7057/5328	4		GO:0002675	positive regulation of acute inflammatory response	4/161	28/18888	8.87672e-05	0.00197921	0.00157104	101/3553/3133/5008	4																										R-HSA-73893	DNA Damage Bypass	10/262	48/11091	1.35227e-07	1.0625e-06
GO:1903318	negative regulation of protein maturation	4/263	30/18888	0.000757156	0.0158789	0.0132292	2619/5054/7057/5328	4		GO:0022407	regulation of cell-cell adhesion	14/161	496/18888	9.18326e-05	0.00203035	0.00161164	7471/101/23149/3135/3553/5777/10385/6401/3105/115650/970/3133/567/283234	14																										R-HSA-1362277	Transcription of E2F targets under negative control by DREAM complex	7/262	19/11091	1.49806e-07	1.1632e-06
GO:0003197	endocardial cushion development	5/263	52/18888	0.000767597	0.0159853	0.0133178	8642/6591/26508/11096/7291	5		GO:0010874	regulation of cholesterol efflux	5/161	54/18888	9.54506e-05	0.00209275	0.00166118	348/5360/10062/1071/54209	5																										R-HSA-176814	Activation of APC/C and APC/C:Cdc20 mediated degradation of mitotic proteins	12/262	76/11091	1.90139e-07	1.45921e-06
GO:0010631	epithelial cell migration	14/263	375/18888	0.000823006	0.0170202	0.01418	2246/6591/54453/2252/25959/25960/7057/1803/8823/8828/8817/9037/3037/5793	14		GO:0032370	positive regulation of lipid transport	6/161	87/18888	9.98177e-05	0.00217042	0.00172282	3553/348/5360/10062/1071/54209	6																										R-HSA-73933	Resolution of Abasic Sites (AP sites)	9/262	39/11091	2.27652e-07	1.72701e-06
GO:0050921	positive regulation of chemotaxis	8/263	142/18888	0.00085597	0.0174202	0.0145132	1902/5919/5054/7057/8823/8817/9037/6387	8		GO:0050863	regulation of T cell activation	12/161	382/18888	0.000109771	0.00236726	0.00187907	101/23149/3135/3553/5777/10385/3105/115650/970/3133/567/283234	12																										R-HSA-176408	Regulation of APC/C activators between G1/S and early anaphase	12/262	80/11091	3.39549e-07	2.54662e-06
GO:0098868	bone growth	4/263	31/18888	0.000859896	0.0174202	0.0145132	4921/2121/4882/4322	4		GO:0002507	tolerance induction	4/161	30/18888	0.000117246	0.00250791	0.00199072	3106/3135/3133/730249	4																										R-HSA-983231	Factors involved in megakaryocyte development and platelet production	17/262	168/11091	4.47943e-07	3.32182e-06
GO:1903055	positive regulation of extracellular matrix organization	4/263	31/18888	0.000859896	0.0174202	0.0145132	4921/11117/23187/30008	4		GO:0002429	immune response-activating cell surface receptor signaling pathway	11/161	332/18888	0.000134161	0.0028466	0.00225956	9111/23149/5777/10385/3105/10062/11027/730249/5336/54209/2358	11																										R-HSA-8856688	Golgi-to-ER retrograde transport	15/262	133/11091	5.36654e-07	3.93546e-06
GO:1903036	positive regulation of response to wounding	6/263	80/18888	0.000874372	0.0175938	0.0146579	4921/11117/5054/7057/10979/5328	6		GO:0030301	cholesterol transport	7/161	132/18888	0.000138624	0.00291777	0.00231605	341/348/5360/10062/5305/1071/54209	7																										R-HSA-5656169	Termination of translesion DNA synthesis	8/262	32/11091	5.6074e-07	4.06691e-06
GO:0090132	epithelium migration	14/263	378/18888	0.000888628	0.0177606	0.0147969	2246/6591/54453/2252/25959/25960/7057/1803/8823/8828/8817/9037/3037/5793	14		GO:0002685	regulation of leukocyte migration	9/161	230/18888	0.000161891	0.00338043	0.0026833	64805/101/6401/79890/3162/3383/7941/54209/2358	9																										R-HSA-1362300	Transcription of E2F targets under negative control by p107 (RBL1) and p130 (RBL2) in complex with HDAC1	6/262	16/11091	1.07736e-06	7.72888e-06
GO:0061037	negative regulation of cartilage development	4/263	32/18888	0.000972082	0.0192111	0.0160053	579/6591/11173/359845	4		GO:0043122	regulation of canonical NF-kappaB signal transduction	10/161	286/18888	0.000176198	0.00365021	0.00289744	6275/7114/3553/6737/3162/338339/80833/8837/5336/54209	10																										R-HSA-68867	Assembly of the pre-replicative complex	15/262	141/11091	1.14253e-06	8.10828e-06
GO:0048562	embryonic organ morphogenesis	12/263	297/18888	0.000979405	0.0192111	0.0160053	579/4323/9935/6474/5311/4237/7043/8516/9645/9464/7291/4325	12		GO:0070555	response to interleukin-1	7/161	138/18888	0.000182643	0.00375417	0.00297997	199713/3553/6368/6401/7850/730249/6362	7																										R-HSA-9687139	Aberrant regulation of mitotic cell cycle due to RB1 defects	8/262	35/11091	1.17994e-06	8.28467e-06
GO:0055123	digestive system development	8/263	145/18888	0.000980552	0.0192111	0.0160053	579/79827/8642/4882/5919/6474/56034/7043	8		GO:0006935	chemotaxis	13/161	466/18888	0.000184534	0.00376364	0.00298748	64805/101/6036/6275/7114/3553/6368/79890/7941/7852/6362/54209/2358	13																										R-HSA-69231	Cyclin D associated events in G1	9/262	47/11091	1.24083e-06	8.53068e-06
GO:0007389	pattern specification process	16/263	474/18888	0.00104474	0.0200716	0.0167222	579/2246/8642/9935/5308/64388/79365/649/8828/26508/144165/5311/10468/3224/9645/9464	16		GO:0042330	taxis	13/161	468/18888	0.000192407	0.00388055	0.00308028	64805/101/6036/6275/7114/3553/6368/79890/7941/7852/6362/54209/2358	13																										R-HSA-69236	G1 Phase	9/262	47/11091	1.24083e-06	8.53068e-06
GO:0043410	positive regulation of MAPK cascade	16/263	475/18888	0.00106792	0.0200716	0.0167222	203447/10371/1902/2246/59/3084/5322/220164/7057/56034/7043/8817/10979/1490/9464/344558	16		GO:0002717	positive regulation of natural killer cell mediated immunity	4/161	34/18888	0.000193216	0.00388055	0.00308028	3134/3135/117157/3133	4																										R-HSA-5696397	Gap-filling DNA repair synthesis and ligation in GG-NER	7/262	25/11091	1.26556e-06	8.61105e-06
GO:0010763	positive regulation of fibroblast migration	3/263	15/18888	0.00107282	0.0200716	0.0167222	4921/59/7057	3		GO:0030100	regulation of endocytosis	10/161	291/18888	0.000202642	0.00403903	0.00320608	274/341/6401/79890/348/567/10062/5336/54209/2358	10																										R-HSA-176409	APC/C:Cdc20 mediated degradation of mitotic proteins	11/262	75/11091	1.33218e-06	8.88117e-06
GO:0061307	cardiac neural crest cell differentiation involved in heart development	3/263	15/18888	0.00107282	0.0200716	0.0167222	5308/9464/7291	3		GO:0009615	response to virus	12/161	409/18888	0.000206956	0.00409399	0.0032497	340061/6036/9111/3553/6737/57379/84166/64108/730249/7852/3663/55509	12																										R-HSA-2995410	Nuclear Envelope (NE) Reassembly	11/262	75/11091	1.33218e-06	8.88117e-06
GO:0061308	cardiac neural crest cell development involved in heart development	3/263	15/18888	0.00107282	0.0200716	0.0167222	5308/9464/7291	3		GO:0071219	cellular response to molecule of bacterial origin	9/161	238/18888	0.000209003	0.00410363	0.00325736	199713/3553/2048/57379/10062/11027/730249/5336/54209	9																										R-HSA-9675126	Diseases of mitotic cell cycle	8/262	37/11091	1.85791e-06	1.22622e-05
GO:2001028	positive regulation of endothelial cell chemotaxis	3/263	15/18888	0.00107282	0.0200716	0.0167222	8823/8817/9037	3		GO:0034142	toll-like receptor 4 signaling pathway	5/161	64/18888	0.00021489	0.00414087	0.00328692	9111/10062/11027/730249/54209	5																										R-HSA-6804114	TP53 Regulates Transcription of Genes Involved in G2 Cell Cycle Arrest	6/262	18/11091	2.39997e-06	1.5683e-05
GO:0042060	wound healing	15/263	430/18888	0.00107596	0.0200716	0.0167222	4921/710/2246/10398/4882/3084/3491/11117/2192/5054/7057/3693/10979/79625/5328	15		GO:0002220	innate immune response activating cell surface receptor signaling pathway	6/161	100/18888	0.000215154	0.00414087	0.00328692	9111/10062/11027/730249/5336/54209	6																										R-HSA-110313	Translesion synthesis by Y family DNA polymerases bypasses lesions on DNA template	8/262	39/11091	2.84195e-06	1.83891e-05
GO:0001954	positive regulation of cell-matrix adhesion	5/263	56/18888	0.0010784	0.0200716	0.0167222	1307/54453/7070/10979/30008	5		GO:0097529	myeloid leukocyte migration	9/161	239/18888	0.000215621	0.00414087	0.00328692	64805/101/3553/6368/79890/7941/6362/54209/2358	9																										R-HSA-2995383	Initiation of Nuclear Envelope (NE) Reformation	6/262	19/11091	3.43851e-06	2.20332e-05
GO:0007565	female pregnancy	9/263	183/18888	0.00108871	0.0201378	0.0167773	1307/2706/3490/2192/3339/7043/5069/1833/85360	9		GO:0034143	regulation of toll-like receptor 4 signaling pathway	4/161	36/18888	0.000242186	0.00461733	0.00366512	10062/11027/730249/54209	4																										R-HSA-69656	Cyclin A:Cdk2-associated events at S phase entry	11/262	85/11091	4.70982e-06	2.98892e-05
GO:0071560	cellular response to transforming growth factor beta stimulus	12/263	302/18888	0.00113021	0.0207763	0.0173093	9315/4921/7041/59/5654/9719/7057/3693/7043/8516/10979/26524	12		GO:0015918	sterol transport	7/161	145/18888	0.000247613	0.00468684	0.00372029	341/348/5360/10062/5305/1071/54209	7																										R-HSA-2132295	MHC class II antigen presentation	13/262	123/11091	6.43636e-06	4.04571e-05
GO:0002687	positive regulation of leukocyte migration	8/263	149/18888	0.00116881	0.0213541	0.0177907	7499/4323/5919/5054/7057/7070/3554/6387	8		GO:0042100	B cell proliferation	6/161	104/18888	0.000266327	0.00496955	0.0039447	51237/2048/115650/970/7293/202309	6																										R-HSA-113501	Inhibition of replication initiation of damaged DNA by RB1/E2F1	5/262	13/11091	7.80355e-06	4.8134e-05
GO:0051149	positive regulation of muscle cell differentiation	6/263	85/18888	0.00120126	0.0217238	0.0180987	284217/3915/4323/3084/6474/30008	6		GO:0042102	positive regulation of T cell proliferation	6/161	104/18888	0.000266327	0.00496955	0.0039447	3553/3105/115650/970/3133/283234	6																										R-HSA-75035	Chk1/Chk2(Cds1) mediated inactivation of Cyclin B:Cdk1 complex	5/262	13/11091	7.80355e-06	4.8134e-05
GO:0044344	cellular response to fibroblast growth factor stimulus	7/263	116/18888	0.00120363	0.0217238	0.0180987	2246/2252/7057/8823/8817/1490/79625	7		GO:0002687	positive regulation of leukocyte migration	7/161	149/18888	0.000292373	0.00541714	0.00429999	64805/101/6401/3383/7941/54209/2358	7																										R-HSA-4615885	SUMOylation of DNA replication proteins	8/262	45/11091	8.80747e-06	5.38234e-05
GO:0048736	appendage development	9/263	186/18888	0.00121983	0.0217434	0.018115	4882/1291/5308/57167/144165/6474/10979/9464/7291	9		GO:0002532	production of molecular mediator involved in inflammatory response	6/161	106/18888	0.000295264	0.00543245	0.00431214	122618/199713/2048/113/7850/54209	6																										R-HSA-380320	Recruitment of NuMA to mitotic centrosomes	11/262	94/11091	1.26343e-05	7.65012e-05
GO:0060173	limb development	9/263	186/18888	0.00121983	0.0217434	0.018115	4882/1291/5308/57167/144165/6474/10979/9464/7291	9		GO:0002369	T cell cytokine production	4/161	38/18888	0.000299496	0.00543431	0.00431361	3134/3553/3105/567	4																										R-HSA-179409	APC-Cdc20 mediated degradation of Nek2A	6/262	25/11091	1.99204e-05	0.000119522
GO:0007435	salivary gland morphogenesis	4/263	34/18888	0.00122663	0.0217434	0.018115	284217/6591/2252/7043	4		GO:0002724	regulation of T cell cytokine production	4/161	38/18888	0.000299496	0.00543431	0.00431361	3134/3553/3105/567	4																										R-HSA-69202	Cyclin E associated events during G1/S transition	10/262	83/11091	2.43148e-05	0.000144574
GO:0031638	zymogen activation	5/263	58/18888	0.00126477	0.0221654	0.0184666	4323/5054/715/7057/5328	5		GO:0034374	low-density lipoprotein particle remodeling	3/161	16/18888	0.000313751	0.00561551	0.00445745	348/7941/1071	3																										R-HSA-110312	Translesion synthesis by REV1	5/262	16/11091	2.49859e-05	0.000147238
GO:0051928	positive regulation of calcium ion transport	7/263	117/18888	0.00126532	0.0221654	0.0184666	781/815/7070/5311/57214/7220/6387	7		GO:0051044	positive regulation of membrane protein ectodomain proteolysis	3/161	16/18888	0.000313751	0.00561551	0.00445745	101/3553/348	3																										R-HSA-2980766	Nuclear Envelope Breakdown	8/262	52/11091	2.66537e-05	0.000155676
GO:0003188	heart valve formation	3/263	16/18888	0.00130686	0.0223669	0.0186345	8642/2702/7291	3		GO:0050728	negative regulation of inflammatory response	8/161	201/18888	0.000334857	0.00595277	0.00472516	57817/7114/5777/348/10062/730249/54209/2358	8																										R-HSA-9645723	Diseases of programmed cell death	11/262	104/11091	3.31436e-05	0.000191884
GO:0010832	negative regulation of myotube differentiation	3/263	16/18888	0.00130686	0.0223669	0.0186345	84814/79365/338773	3		GO:0071347	cellular response to interleukin-1	6/161	110/18888	0.000360513	0.00636583	0.00505304	199713/3553/6368/7850/730249/6362	6																										R-HSA-5655862	Translesion synthesis by POLK	5/262	17/11091	3.47166e-05	0.000194177
GO:0051895	negative regulation of focal adhesion assembly	3/263	16/18888	0.00130686	0.0223669	0.0186345	4323/10395/7057	3		GO:0045807	positive regulation of endocytosis	7/161	155/18888	0.00037149	0.00650514	0.00516362	274/6401/348/567/5336/54209/2358	7																										R-HSA-5656121	Translesion synthesis by POLI	5/262	17/11091	3.47166e-05	0.000194177
GO:0150118	negative regulation of cell-substrate junction organization	3/263	16/18888	0.00130686	0.0223669	0.0186345	4323/10395/7057	3		GO:0140895	cell surface toll-like receptor signaling pathway	5/161	72/18888	0.000373347	0.00650514	0.00516362	9111/10062/11027/730249/54209	5																										R-HSA-9659787	Aberrant regulation of mitotic G1/S transition in cancer due to RB1 defects	5/262	17/11091	3.47166e-05	0.000194177
GO:0070372	regulation of ERK1 and ERK2 cascade	12/263	308/18888	0.00133614	0.0227373	0.0189431	2246/59/3084/3491/11117/5322/2192/56034/8817/10979/1490/9464	12		GO:0032368	regulation of lipid transport	7/161	156/18888	0.0003862	0.00668482	0.00530624	341/3553/348/5360/10062/1071/54209	7																										R-HSA-9661069	Defective binding of RB1 mutants to E2F1,(E2F2, E2F3)	5/262	17/11091	3.47166e-05	0.000194177
GO:0008543	fibroblast growth factor receptor signaling pathway	6/263	87/18888	0.00135541	0.0228045	0.0189991	2246/2252/7057/8823/8817/1490	6		GO:1905954	positive regulation of lipid localization	6/161	112/18888	0.000397106	0.00682867	0.00542042	3553/348/5360/10062/1071/54209	6																										R-HSA-380259	Loss of Nlp from mitotic centrosomes	9/262	70/11091	3.68657e-05	0.000202761
GO:0055013	cardiac muscle cell development	6/263	87/18888	0.00135541	0.0228045	0.0189991	4629/5999/144165/6474/115701/80206	6		GO:0034612	response to tumor necrosis factor	9/161	263/18888	0.000435236	0.00743576	0.00590232	7114/355/6368/6401/115650/970/7293/730249/6362	9																										R-HSA-380284	Loss of proteins required for interphase microtubule organization from the centrosome	9/262	70/11091	3.68657e-05	0.000202761
GO:0071559	response to transforming growth factor beta	12/263	309/18888	0.00137331	0.0229759	0.0191419	9315/4921/7041/59/5654/9719/7057/3693/7043/8516/10979/26524	12		GO:0006040	amino sugar metabolic process	4/161	42/18888	0.000442283	0.0075074	0.00595919	216/5973/4245/1118	4																										R-HSA-5696400	Dual Incision in GG-NER	7/262	41/11091	4.28443e-05	0.000233696
GO:0060317	cardiac epithelial to mesenchymal transition	4/263	36/18888	0.00152446	0.0253623	0.02113	6591/26508/7291/3037	4		GO:0002923	regulation of humoral immune response mediated by circulating immunoglobulin	3/161	18/18888	0.00045149	0.00756606	0.00600575	5777/1379/54209	3																										R-HSA-174178	APC/C:Cdh1 mediated degradation of Cdc20 and other APC/C:Cdh1 targeted proteins in late mitosis/early G1	9/262	73/11091	5.17412e-05	0.000277636
GO:0045667	regulation of osteoblast differentiation	8/263	156/18888	0.0015668	0.0258421	0.0215298	4921/6591/3491/338773/10979/9464/7291/117581	8		GO:0150078	positive regulation of neuroinflammatory response	3/161	18/18888	0.00045149	0.00756606	0.00600575	3553/5336/54209	3																										R-HSA-179419	APC:Cdc20 mediated degradation of cell cycle proteins prior to satisfation of the cell cycle checkpoint	9/262	73/11091	5.17412e-05	0.000277636
GO:0061548	ganglion development	3/263	17/18888	0.00157066	0.0258421	0.0215298	10371/8828/5999	3		GO:0071216	cellular response to biotic stimulus	9/161	265/18888	0.000459771	0.00765606	0.00607718	199713/3553/2048/57379/10062/11027/730249/5336/54209	9																										R-HSA-73884	Base Excision Repair	10/262	91/11091	5.4441e-05	0.000289766
GO:0002688	regulation of leukocyte chemotaxis	7/263	123/18888	0.0016892	0.0273383	0.0227763	5919/5054/7057/1803/79148/683/6387	7		GO:0019724	B cell mediated immunity	8/161	212/18888	0.000477581	0.00790261	0.00627289	3135/5777/57379/1379/970/3133/202309/54209	8																										R-HSA-110320	Translesion Synthesis by POLH	5/262	19/11091	6.27559e-05	0.000328721
GO:0003161	cardiac conduction system development	4/263	37/18888	0.00169075	0.0273383	0.0227763	8913/2702/6474/9242	4		GO:1904646	cellular response to amyloid-beta	4/161	43/18888	0.000484432	0.00796589	0.00632312	2048/3383/54209/2358	4																										R-HSA-176412	Phosphorylation of the APC/C	5/262	19/11091	6.27559e-05	0.000328721
GO:0007431	salivary gland development	4/263	37/18888	0.00169075	0.0273383	0.0227763	284217/6591/2252/7043	4		GO:0070374	positive regulation of ERK1 and ERK2 cascade	8/161	215/18888	0.000524057	0.00856394	0.00679784	6368/348/3383/8837/6362/151306/54209/2358	8																										R-HSA-141405	Inhibition of the proteolytic activity of APC/C required for the onset of anaphase by mitotic spindle checkpoint components	5/262	20/11091	8.20694e-05	0.00042317
GO:0090092	regulation of transmembrane receptor protein serine/threonine kinase signaling pathway	12/263	317/18888	0.00170256	0.0273383	0.0227763	9315/7041/5654/3491/11117/64388/9719/7057/10468/7043/8516/26524	12		GO:0002281	macrophage activation involved in immune response	3/161	19/18888	0.0005328	0.00865307	0.00686858	9111/5336/54209	3																										R-HSA-141430	Inactivation of APC/C via direct inhibition of the APC/C complex	5/262	20/11091	8.20694e-05	0.00042317
GO:2000351	regulation of endothelial cell apoptotic process	5/263	62/18888	0.0017075	0.0273383	0.0227763	57124/5054/7057/9037/79625	5		GO:0002752	cell surface pattern recognition receptor signaling pathway	5/161	79/18888	0.000573315	0.00925394	0.00734554	9111/10062/11027/730249/54209	5																										R-HSA-6811442	Intra-Golgi and retrograde Golgi-to-ER traffic	15/262	202/11091	8.82155e-05	0.000451335
GO:0010755	regulation of plasminogen activation	3/263	18/18888	0.00186551	0.0292977	0.0244087	5054/7057/5328	3		GO:0007193	adenylate cyclase-inhibiting G protein-coupled receptor signaling pathway	5/161	80/18888	0.000607377	0.00974396	0.00773451	64805/5660/113/3640/2358	5																										R-HSA-5620912	Anchoring of the basal body to the plasma membrane	10/262	98/11091	0.000102651	0.000521154
GO:0051917	regulation of fibrinolysis	3/263	18/18888	0.00186551	0.0292977	0.0244087	5054/7057/5328	3		GO:0034144	negative regulation of toll-like receptor 4 signaling pathway	3/161	20/18888	0.000622914	0.00993265	0.00788429	11027/730249/54209	3																										R-HSA-6782210	Gap-filling DNA repair synthesis and ligation in TC-NER	8/262	63/11091	0.00010963	0.000552336
GO:0048846	axon extension involved in axon guidance	4/263	38/18888	0.00186923	0.0292977	0.0244087	10371/8828/9037/6387	4		GO:0051235	maintenance of location	10/161	337/18888	0.000643861	0.0101562	0.00806172	2512/7114/3553/5777/126306/348/2760/10062/5336/54209	10																										R-HSA-6782135	Dual incision in TC-NER	8/262	64/11091	0.000122768	0.000613842
GO:1902284	neuron projection extension involved in neuron projection guidance	4/263	38/18888	0.00186923	0.0292977	0.0244087	10371/8828/9037/6387	4		GO:0043409	negative regulation of MAPK cascade	7/161	170/18888	0.0006457	0.0101562	0.00806172	1844/3553/5777/2048/10385/348/54209	7																										R-HSA-380270	Recruitment of mitotic centrosome proteins and complexes	9/262	82/11091	0.000129829	0.000639457
GO:0072593	reactive oxygen species metabolic process	10/263	238/18888	0.00191589	0.0298718	0.024887	7837/1291/285590/3491/4314/7057/683/9644/1490/55022	10		GO:0042113	B cell activation	9/161	278/18888	0.000648514	0.0101562	0.00806172	51237/5777/2048/57379/115650/970/7293/202309/5336	9																										R-HSA-380287	Centrosome maturation	9/262	82/11091	0.000129829	0.000639457
GO:0055006	cardiac cell development	6/263	94/18888	0.00201623	0.0312725	0.026054	4629/5999/144165/6474/115701/80206	6		GO:0032479	regulation of type I interferon production	6/161	124/18888	0.000681729	0.0105508	0.00837492	340061/9111/6737/730249/3663/5336	6																										R-HSA-8953750	Transcriptional Regulation by E2F6	6/262	35/11091	0.000149746	0.000732094
GO:0003206	cardiac chamber morphogenesis	7/263	127/18888	0.00202805	0.0312929	0.0260709	3084/3491/8828/26508/6474/55742/9464	7		GO:0032606	type I interferon production	6/161	124/18888	0.000681729	0.0105508	0.00837492	340061/9111/6737/730249/3663/5336	6																										R-HSA-2990846	SUMOylation	14/262	189/11091	0.000155399	0.00075414
GO:0010812	negative regulation of cell-substrate adhesion	5/263	65/18888	0.00210723	0.032347	0.0269492	4323/2192/10395/5054/7057	5		GO:0071222	cellular response to lipopolysaccharide	8/161	225/18888	0.000706139	0.0108646	0.00862407	199713/3553/2048/57379/10062/11027/730249/5336	8																										R-HSA-174048	APC/C:Cdc20 mediated degradation of Cyclin B	5/262	23/11091	0.000168074	0.000809699
GO:0048706	embryonic skeletal system development	7/263	128/18888	0.00212044	0.032383	0.0269791	579/4323/6474/7043/9464/7291/4325	7		GO:0043269	regulation of monoatomic ion transport	12/161	470/18888	0.000718549	0.0109202	0.00866819	64805/57817/246329/274/7114/5777/2048/126306/567/11027/7852/54209	12																										R-HSA-174430	Telomere C-strand synthesis initiation	4/262	13/11091	0.000183923	0.000879634
GO:0002693	positive regulation of cellular extravasation	3/263	19/18888	0.00219265	0.0329783	0.0274751	7499/7070/3554	3		GO:0002396	MHC protein complex assembly	3/161	21/18888	0.000722203	0.0109202	0.00866819	3105/567/6892	3																										R-HSA-69615	G1/S DNA Damage Checkpoints	8/262	68/11091	0.000189017	0.000897489
GO:0003184	pulmonary valve morphogenesis	3/263	19/18888	0.00219265	0.0329783	0.0274751	2702/26508/11096	3		GO:0002501	peptide antigen assembly with MHC protein complex	3/161	21/18888	0.000722203	0.0109202	0.00866819	3105/567/6892	3																										R-HSA-162658	Golgi Cisternae Pericentriolar Stack Reorganization	4/262	14/11091	0.000252731	0.00118299
GO:0036342	post-anal tail morphogenesis	3/263	19/18888	0.00219265	0.0329783	0.0274751	8642/4882/144165	3		GO:0002673	regulation of acute inflammatory response	4/161	48/18888	0.000738985	0.0111101	0.00881893	101/3553/3133/5008	4																										R-HSA-5358565	Mismatch repair (MMR) directed by MSH2:MSH6 (MutSalpha)	4/262	14/11091	0.000252731	0.00118299
GO:0007178	transmembrane receptor protein serine/threonine kinase signaling pathway	14/263	417/18888	0.00222922	0.0333599	0.027793	9315/7041/5654/3491/11117/64388/9719/7057/10468/3693/7043/8516/10979/26524	14		GO:0043410	positive regulation of MAPK cascade	12/161	475/18888	0.000787837	0.0117773	0.00934849	101/3553/6368/348/3383/8837/6362/5008/151306/5336/54209/2358	12																										R-HSA-174184	Cdc20:Phospho-APC/C mediated degradation of Cyclin A	8/262	72/11091	0.000282169	0.00130232
GO:0001953	negative regulation of cell-matrix adhesion	4/263	40/18888	0.00226454	0.033719	0.0280922	4323/10395/5054/7057	4		GO:0001959	regulation of cytokine-mediated signaling pathway	7/161	177/18888	0.000819219	0.0121703	0.0096605	340061/5777/84166/10062/7850/7852/54209	7																										R-HSA-69017	CDK-mediated phosphorylation and removal of Cdc6	8/262	72/11091	0.000282169	0.00130232
GO:0044703	multi-organism reproductive process	9/263	204/18888	0.00229925	0.0339771	0.0283073	1307/2706/3490/2192/3339/7043/5069/1833/85360	9		GO:0032496	response to lipopolysaccharide	10/161	348/18888	0.000823382	0.0121703	0.0096605	199713/3553/2048/57379/6401/10062/11027/730249/5336/54209	10																										R-HSA-4419969	Depolymerization of the Nuclear Lamina	4/262	15/11091	0.000338264	0.00153968
GO:0055007	cardiac muscle cell differentiation	7/263	130/18888	0.00231498	0.0339771	0.0283073	4629/3084/5999/144165/6474/115701/80206	7		GO:0030449	regulation of complement activation	3/161	22/18888	0.000831024	0.0122147	0.00969569	3553/1379/54209	3																										R-HSA-5358508	Mismatch Repair	4/262	15/11091	0.000338264	0.00153968
GO:0072001	renal system development	12/263	329/18888	0.0023161	0.0339771	0.0283073	9955/84662/2246/8642/59/25959/26508/144165/5311/8516/3037/4311	12		GO:0030595	leukocyte chemotaxis	8/161	237/18888	0.000988619	0.0144503	0.0114703	101/3553/6368/79890/7941/7852/6362/2358	8																										R-HSA-3108232	SUMO E3 ligases SUMOylate target proteins	13/262	183/11091	0.000399793	0.00180728
GO:0007179	transforming growth factor beta receptor signaling pathway	10/263	245/18888	0.00236653	0.0345467	0.0287818	9315/7041/5654/9719/7057/3693/7043/8516/10979/26524	10		GO:0002639	positive regulation of immunoglobulin production	4/161	53/18888	0.00107602	0.0155929	0.0123772	51237/2048/3133/7293	4																										R-HSA-6781827	Transcription-Coupled Nucleotide Excision Repair (TC-NER)	8/262	77/11091	0.000448209	0.00199877
GO:0061572	actin filament bundle organization	8/263	167/18888	0.00240173	0.0348895	0.0290674	1902/10395/359845/3693/7043/800/10979/1490	8		GO:0002922	positive regulation of humoral immune response	3/161	24/18888	0.00107864	0.0155929	0.0123772	3553/730249/54209	3																										R-HSA-8852276	The role of GTSE1 in G2/M progression after G2 checkpoint	8/262	77/11091	0.000448209	0.00199877
GO:0010762	regulation of fibroblast migration	4/263	41/18888	0.00248226	0.0355483	0.0296162	4921/79899/59/7057	4		GO:1905952	regulation of lipid localization	7/161	186/18888	0.00109431	0.015733	0.0124884	341/3553/348/5360/10062/1071/54209	7																										R-HSA-187577	SCF(Skp2)-mediated degradation of p27/p21	7/262	60/11091	0.000502436	0.00222556
GO:0051281	positive regulation of release of sequestered calcium ion into cytosol	4/263	41/18888	0.00248226	0.0355483	0.0296162	7070/5311/57214/7220	4		GO:0071356	cellular response to tumor necrosis factor	8/161	241/18888	0.00110068	0.0157385	0.0124928	7114/355/6368/115650/970/7293/730249/6362	8																										R-HSA-68875	Mitotic Prophase	11/262	141/11091	0.000506853	0.00223015
GO:0014909	smooth muscle cell migration	6/263	98/18888	0.00248945	0.0355483	0.0296162	4921/1902/5054/55742/5328/3037	6		GO:0032411	positive regulation of transporter activity	5/161	92/18888	0.0011449	0.0162427	0.0128931	246329/7114/2048/10062/54209	5																										R-HSA-6796648	TP53 Regulates Transcription of DNA Repair Genes	7/262	62/11091	0.000614684	0.0026867
GO:0070371	ERK1 and ERK2 cascade	12/263	332/18888	0.00249482	0.0355483	0.0296162	2246/59/3084/3491/11117/5322/2192/56034/8817/10979/1490/9464	12		GO:0032092	positive regulation of protein binding	4/161	54/18888	0.00115446	0.0162427	0.0128931	340061/6737/348/567	4																										R-HSA-174414	Processive synthesis on the C-strand of the telomere	4/262	19/11091	0.000891589	0.00387138
GO:0072577	endothelial cell apoptotic process	5/263	68/18888	0.00257123	0.0364625	0.0303779	57124/5054/7057/9037/79625	5		GO:1904645	response to amyloid-beta	4/161	54/18888	0.00115446	0.0162427	0.0128931	2048/3383/54209/2358	4																										R-HSA-5617833	Cilium Assembly	13/262	201/11091	0.000967681	0.00417431
GO:0060562	epithelial tube morphogenesis	12/263	335/18888	0.00268464	0.0378903	0.0315674	284217/9955/2246/8642/4323/10395/57167/144165/5311/9645/9464/7291	12		GO:0060759	regulation of response to cytokine stimulus	7/161	189/18888	0.00120057	0.0168016	0.0133367	340061/5777/84166/10062/7850/7852/54209	7																										R-HSA-9013026	RHOB GTPase cycle	7/262	70/11091	0.00127686	0.00547226
GO:0051154	negative regulation of striated muscle cell differentiation	4/263	42/18888	0.00271393	0.0381231	0.0317614	84814/79365/338773/5999	4		GO:0009110	vitamin biosynthetic process	3/161	25/18888	0.0012181	0.0168588	0.0133821	27010/231/5360	3																										R-HSA-2465910	MASTL Facilitates Mitotic Progression	3/262	10/11091	0.00138278	0.00588798
GO:0030193	regulation of blood coagulation	5/263	69/18888	0.00274116	0.0383248	0.0319294	710/11117/5054/7057/5328	5		GO:0060586	multicellular organismal-level iron ion homeostasis	3/161	25/18888	0.0012181	0.0168588	0.0133821	57817/3162/567	3																										R-HSA-9710421	Defective pyroptosis	7/262	72/11091	0.00150767	0.00637859
GO:0003002	regionalization	14/263	429/18888	0.00288125	0.0400951	0.0334043	579/2246/9935/5308/64388/79365/649/8828/26508/144165/5311/3224/9645/9464	14		GO:0002757	immune response-activating signaling pathway	12/161	500/18888	0.00122388	0.0168588	0.0133821	340061/9111/23149/5777/10385/3105/10062/11027/730249/5336/54209/2358	12																										R-HSA-8862803	Deregulated CDK5 triggers multiple neurodegenerative pathways in Alzheimer's disease models	4/262	22/11091	0.0015915	0.00664802
GO:0050922	negative regulation of chemotaxis	5/263	70/18888	0.00291908	0.0404326	0.0336855	10371/7057/1803/79148/9037	5		GO:0034381	plasma lipoprotein particle clearance	4/161	55/18888	0.00123683	0.0168606	0.0133835	341/348/3162/54209	4																										R-HSA-8863678	Neurodegenerative Diseases	4/262	22/11091	0.0015915	0.00664802
GO:0044706	multi-multicellular organism process	9/263	212/18888	0.00297489	0.041015	0.0341707	1307/2706/3490/2192/3339/7043/5069/1833/85360	9		GO:2000772	regulation of cellular senescence	4/161	55/18888	0.00123683	0.0168606	0.0133835	7471/3135/22846/567	4																										R-HSA-9013106	RHOC GTPase cycle	7/262	74/11091	0.00176978	0.00734624
GO:1900046	regulation of hemostasis	5/263	71/18888	0.00310519	0.0426141	0.0355029	710/11117/5054/7057/5328	5		GO:0019915	lipid storage	5/161	94/18888	0.00126064	0.0170967	0.0135709	3553/348/2760/10062/54209	5																										R-HSA-171319	Telomere Extension By Telomerase	4/262	23/11091	0.00189116	0.00780105
GO:0010632	regulation of epithelial cell migration	11/263	298/18888	0.00317958	0.0433834	0.0361439	2246/54453/2252/25960/7057/8823/8828/8817/9037/3037/5793	11		GO:0051607	defense response to virus	9/161	307/18888	0.00130213	0.0175687	0.0139456	340061/6036/3553/6737/57379/84166/64108/730249/3663	9																										R-HSA-9833482	PKR-mediated signaling	7/262	75/11091	0.00191343	0.00784389
GO:1902905	positive regulation of supramolecular fiber organization	8/263	175/18888	0.00320246	0.0433834	0.0361439	1902/7043/10979/1490/9037/55243/30008/25802	8		GO:0002823	negative regulation of adaptive immune response based on somatic recombination of immune receptors built from immunoglobulin superfamily domains	4/161	56/18888	0.00132322	0.0177622	0.0140992	3134/3135/5777/1379	4																										R-HSA-2559583	Cellular Senescence	12/262	195/11091	0.00228797	0.00932135
GO:0071526	semaphorin-plexin signaling pathway	4/263	44/18888	0.00322089	0.0433834	0.0361439	10371/8828/9037/9464	4		GO:0002726	positive regulation of T cell cytokine production	3/161	26/18888	0.00136842	0.0179978	0.0142862	3553/3105/567	3																										R-HSA-5685939	HDR through MMEJ (alt-NHEJ)	3/262	12/11091	0.0024478	0.00991133
GO:0141091	transforming growth factor beta receptor superfamily signaling pathway	13/263	388/18888	0.00322334	0.0433834	0.0361439	9315/7041/5654/3491/64388/9719/7057/10468/3693/7043/8516/10979/26524	13		GO:0098581	detection of external biotic stimulus	3/161	26/18888	0.00136842	0.0179978	0.0142862	3106/3105/54209	3																										R-HSA-9734009	Defective Intrinsic Pathway for Apoptosis	4/262	25/11091	0.00260345	0.0104773
GO:0061041	regulation of wound healing	7/263	138/18888	0.00323409	0.0433834	0.0361439	4921/710/11117/5054/7057/10979/5328	7		GO:0034341	response to type II interferon	6/161	142/18888	0.00137809	0.0179978	0.0142862	6737/6368/84166/10062/730249/6362	6																										R-HSA-68884	Mitotic Telophase/Cytokinesis	3/262	13/11091	0.00312696	0.0125078
GO:0070374	positive regulation of ERK1 and ERK2 cascade	9/263	215/18888	0.00326531	0.0436058	0.0363292	2246/59/3084/5322/56034/8817/10979/1490/9464	9		GO:0050921	positive regulation of chemotaxis	6/161	142/18888	0.00137809	0.0179978	0.0142862	64805/7114/7941/7852/54209/2358	6																										R-HSA-5696399	Global Genome Nucleotide Excision Repair (GG-NER)	7/262	84/11091	0.0036505	0.014514
GO:0061326	renal tubule development	6/263	104/18888	0.00334977	0.044526	0.0370958	9955/2246/8642/26508/144165/5311	6		GO:0006066	alcohol metabolic process	10/161	373/18888	0.00138761	0.0179978	0.0142862	216/341/27010/8542/10170/348/231/5336/1071/23780	10																										R-HSA-5358606	Mismatch repair (MMR) directed by MSH2:MSH3 (MutSbeta)	3/262	14/11091	0.00391084	0.015364
GO:0048485	sympathetic nervous system development	3/263	22/18888	0.00337907	0.044526	0.0370958	10371/8828/9464	3		GO:0002377	immunoglobulin production	7/161	194/18888	0.00139549	0.0179978	0.0142862	51237/29802/2048/57379/3133/7293/202309	7																										R-HSA-9825892	Regulation of MITF-M-dependent genes involved in cell cycle and proliferation	3/262	14/11091	0.00391084	0.015364
GO:0060445	branching involved in salivary gland morphogenesis	3/263	22/18888	0.00337907	0.044526	0.0370958	284217/6591/2252	3		GO:0071706	tumor necrosis factor superfamily cytokine production	7/161	194/18888	0.00139549	0.0179978	0.0142862	101/5777/2048/3133/11027/5336/54209	7																										R-HSA-5696398	Nucleotide Excision Repair	8/262	109/11091	0.00424148	0.0165644
GO:0017015	regulation of transforming growth factor beta receptor signaling pathway	8/263	177/18888	0.0034318	0.0448241	0.0373442	9315/7041/5654/9719/7057/7043/8516/26524	8		GO:1903555	regulation of tumor necrosis factor superfamily cytokine production	7/161	194/18888	0.00139549	0.0179978	0.0142862	101/5777/2048/3133/11027/5336/54209	7																										R-HSA-69563	p53-Dependent G1 DNA Damage Response	6/262	66/11091	0.00455795	0.0175921
GO:0030178	negative regulation of Wnt signaling pathway	8/263	177/18888	0.0034318	0.0448241	0.0373442	147906/6591/3090/388336/85409/144165/115701/26524	8		GO:0002275	myeloid cell activation involved in immune response	5/161	97/18888	0.00145018	0.0186118	0.0147736	9111/5777/11027/5336/54209	5																										R-HSA-69580	p53-Dependent G1/S DNA damage checkpoint	6/262	66/11091	0.00455795	0.0175921
GO:0010463	mesenchymal cell proliferation	4/263	45/18888	0.00349703	0.0452789	0.0377231	8642/2252/6474/9464	4		GO:1901653	cellular response to peptide	10/161	376/18888	0.00147256	0.0188073	0.0149288	7471/51237/7253/3553/2048/3383/5305/8837/54209/2358	10																										R-HSA-499943	Interconversion of nucleotide di- and triphosphates	4/262	30/11091	0.00514277	0.0197339
GO:0048701	embryonic cranial skeleton morphogenesis	4/263	45/18888	0.00349703	0.0452789	0.0377231	4323/7043/7291/4325	4		GO:0051043	regulation of membrane protein ectodomain proteolysis	3/161	27/18888	0.00152989	0.0194452	0.0154351	101/3553/348	3																										R-HSA-174437	Removal of the Flap Intermediate from the C-strand	3/262	17/11091	0.00693377	0.0263005
GO:0050679	positive regulation of epithelial cell proliferation	9/263	219/18888	0.00368677	0.047529	0.0395977	3915/2246/2252/8828/3339/9037/6387/7291/3037	9		GO:0001818	negative regulation of cytokine production	10/161	381/18888	0.00162352	0.0204378	0.016223	3134/9111/199713/5777/2048/10385/113/7850/730249/54209	10																										R-HSA-4655427	SUMOylation of DNA methylation proteins	3/262	17/11091	0.00693377	0.0263005
GO:0050818	regulation of coagulation	5/263	74/18888	0.00371481	0.0476841	0.0397269	710/11117/5054/7057/5328	5		GO:0051090	regulation of DNA-binding transcription factor activity	10/161	381/18888	0.00162352	0.0204378	0.016223	7471/340061/3553/6737/84166/57413/7293/730249/8837/5336	10																										R-HSA-165054	Rev-mediated nuclear export of HIV RNA	4/262	34/11091	0.0080855	0.030407
GO:1902622	regulation of neutrophil migration	4/263	46/18888	0.00378881	0.048354	0.040285	7499/1803/3554/683	4		GO:0006959	humoral immune response	8/161	258/18888	0.0016954	0.0212329	0.0168541	5699/3553/5777/1379/3105/3133/730249/54209	8																										R-HSA-8980692	RHOA GTPase cycle	9/262	147/11091	0.00810852	0.030407
GO:1903844	regulation of cellular response to transforming growth factor beta stimulus	8/263	180/18888	0.00379947	0.048354	0.040285	9315/7041/5654/9719/7057/7043/8516/26524	8		GO:0001773	myeloid dendritic cell activation	3/161	28/18888	0.00170283	0.0212329	0.0168541	116071/338339/55509	3																										R-HSA-9013405	RHOD GTPase cycle	5/262	54/11091	0.00872082	0.0325183
GO:0050900	leukocyte migration	13/263	396/18888	0.00382827	0.0485131	0.0404176	7499/4323/11117/5919/5054/7057/7070/1803/3554/79148/683/6387/4920	13		GO:0001961	positive regulation of cytokine-mediated signaling pathway	4/161	60/18888	0.00171112	0.0212356	0.0168563	340061/84166/7852/54209	4																										R-HSA-1169410	Antiviral mechanism by IFN-stimulated genes	9/262	149/11091	0.00882464	0.0327206
GO:0003177	pulmonary valve development	3/263	23/18888	0.00384632	0.0485353	0.0404361	2702/26508/11096	3		GO:0060326	cell chemotaxis	9/161	322/18888	0.0018062	0.0223104	0.0177094	101/7114/3553/6368/79890/7941/7852/6362/2358	9																										R-HSA-15869	Metabolism of nucleotides	7/262	99/11091	0.00891415	0.0328635
GO:0045123	cellular extravasation	5/263	75/18888	0.00393582	0.0494551	0.0412024	7499/7070/3554/683/6387	5		GO:0002820	negative regulation of adaptive immune response	4/161	61/18888	0.00181918	0.0223658	0.0177534	3134/3135/5777/1379	4																										R-HSA-3301854	Nuclear Pore Complex (NPC) Disassembly	4/262	35/11091	0.00896276	0.0328635
										GO:0015914	phospholipid transport	5/161	103/18888	0.00189114	0.0231423	0.0183698	341/79895/348/5360/1071	5																										R-HSA-176407	Conversion from APC/C:Cdc20 to APC/C:Cdh1 in late anaphase	3/262	19/11091	0.00954314	0.034607
LumA-ceRM4										GO:0002712	regulation of B cell mediated immunity	4/161	62/18888	0.00193189	0.0234231	0.0185927	5777/1379/3133/54209	4																										R-HSA-9687136	Aberrant regulation of mitotic exit in cancer due to RB1 defects	3/262	19/11091	0.00954314	0.034607
ID	Description	GeneRatio	BgRatio	pvalue	p.adjust	qvalue	geneID	Count		GO:0002889	regulation of immunoglobulin mediated immune response	4/161	62/18888	0.00193189	0.0234231	0.0185927	5777/1379/3133/54209	4																										R-HSA-177243	Interactions of Rev with host cellular proteins	4/262	36/11091	0.00989987	0.0355104
GO:0019915	lipid storage	6/44	94/18888	7.83496e-08	6.485e-05	4.55276e-05	130399/4023/948/3952/1149/63924	6		GO:0071674	mononuclear cell migration	7/161	206/18888	0.00196457	0.02371	0.0188204	101/6368/3383/7941/7852/6362/2358	7																										R-HSA-6804757	Regulation of TP53 Degradation	4/262	36/11091	0.00989987	0.0355104
GO:0042572	retinol metabolic process	5/44	52/18888	1.30004e-07	6.485e-05	4.55276e-05	3991/124/125/5950/5959	5		GO:0032615	interleukin-12 production	4/161	63/18888	0.00204935	0.0245083	0.0194541	3106/3135/3663/5336	4																										R-HSA-1852241	Organelle biogenesis and maintenance	14/262	296/11091	0.01066	0.0380302
GO:0034308	primary alcohol metabolic process	6/44	106/18888	1.60785e-07	6.485e-05	4.55276e-05	3991/124/125/5950/2819/5959	6		GO:0032655	regulation of interleukin-12 production	4/161	63/18888	0.00204935	0.0245083	0.0194541	3106/3135/3663/5336	4																										R-HSA-6806003	Regulation of TP53 Expression and Degradation	4/262	37/11091	0.0108983	0.0386714
GO:0016042	lipid catabolic process	8/44	340/18888	1.02299e-06	0.000247275	0.000173598	5346/3991/5105/4023/3952/9370/1149/63924	8		GO:0043123	positive regulation of canonical NF-kappaB signal transduction	7/161	208/18888	0.00207472	0.0245899	0.0195188	6275/3553/6737/3162/338339/80833/8837	7																										R-HSA-5625900	RHO GTPases activate CIT	3/262	20/11091	0.0110342	0.038737
GO:0120161	regulation of cold-induced thermogenesis	6/44	151/18888	1.29827e-06	0.000247275	0.000173598	2167/948/3952/9370/1149/50486	6		GO:0015748	organophosphate ester transport	6/161	154/18888	0.00208046	0.0245899	0.0195188	341/219855/79895/348/5360/1071	6																										R-HSA-6804115	TP53 regulates transcription of additional cell cycle genes whose exact role in the p53 pathway remain uncertain	3/262	20/11091	0.0110342	0.038737
GO:0106106	cold-induced thermogenesis	6/44	152/18888	1.34929e-06	0.000247275	0.000173598	2167/948/3952/9370/1149/50486	6		GO:0065005	protein-lipid complex assembly	3/161	30/18888	0.0020842	0.0245899	0.0195188	274/341/348	3
GO:0001523	retinoid metabolic process	5/44	84/18888	1.46146e-06	0.000247275	0.000173598	3991/124/125/5950/5959	5		GO:0030888	regulation of B cell proliferation	4/161	64/18888	0.00217164	0.0255071	0.0202469	51237/2048/115650/7293	4
GO:0006094	gluconeogenesis	5/44	89/18888	1.9481e-06	0.000247275	0.000173598	5105/5950/2819/3952/9370	5		GO:0072677	eosinophil migration	3/161	31/18888	0.00229318	0.0266963	0.0211908	101/6368/6362	3
GO:0016101	diterpenoid metabolic process	5/44	89/18888	1.9481e-06	0.000247275	0.000173598	3991/124/125/5950/5959	5		GO:1902042	negative regulation of extrinsic apoptotic signaling pathway via death domain receptors	3/161	31/18888	0.00229318	0.0266963	0.0211908	3162/3383/8837	3
GO:0006066	alcohol metabolic process	8/44	373/18888	2.04359e-06	0.000247275	0.000173598	3991/5105/124/125/5950/2819/3952/5959	8		GO:0002526	acute inflammatory response	5/161	109/18888	0.00242307	0.0280841	0.0222925	101/3553/3133/5008/23780	5
GO:0019319	hexose biosynthetic process	5/44	92/18888	2.29617e-06	0.000252125	0.000177003	5105/5950/2819/3952/9370	5		GO:0050866	negative regulation of cell activation	7/161	215/18888	0.00249834	0.0288295	0.0228842	3135/5777/10385/3133/348/10062/54209	7
GO:1990845	adaptive thermogenesis	6/44	169/18888	2.50042e-06	0.000252125	0.000177003	2167/948/3952/9370/1149/50486	6		GO:0042116	macrophage activation	5/161	110/18888	0.00252129	0.0289673	0.0229935	57817/9111/10062/5336/54209	5
GO:0046364	monosaccharide biosynthetic process	5/44	96/18888	2.8344e-06	0.000263818	0.000185212	5105/5950/2819/3952/9370	5		GO:0060760	positive regulation of response to cytokine stimulus	4/161	67/18888	0.0025686	0.0293825	0.0233231	340061/84166/7852/54209	4
GO:0006721	terpenoid metabolic process	5/44	100/18888	3.46722e-06	0.00029375	0.000206226	3991/124/125/5950/5959	5		GO:1903557	positive regulation of tumor necrosis factor superfamily cytokine production	5/161	113/18888	0.00283328	0.03227	0.0256151	101/2048/3133/11027/5336	5
GO:0120162	positive regulation of cold-induced thermogenesis	5/44	101/18888	3.64153e-06	0.00029375	0.000206226	2167/948/3952/9370/50486	5		GO:0060191	regulation of lipase activity	4/161	69/18888	0.00285928	0.0324257	0.0257387	341/6401/115727/10062	4
GO:0001659	temperature homeostasis	6/44	183/18888	3.96184e-06	0.000299614	0.000210343	2167/948/3952/9370/1149/50486	6		GO:0002548	monocyte chemotaxis	4/161	70/18888	0.00301273	0.0340193	0.0270036	6368/7941/6362/2358	4
GO:0010883	regulation of lipid storage	4/44	54/18888	7.44007e-06	0.000500138	0.000351119	4023/948/3952/1149	4		GO:0048259	regulation of receptor-mediated endocytosis	5/161	115/18888	0.00305622	0.0343629	0.0272764	341/6401/79890/567/5336	5
GO:0050873	brown fat cell differentiation	4/44	54/18888	7.44007e-06	0.000500138	0.000351119	2167/56301/3952/9370	4		GO:2000822	regulation of behavioral fear response	2/161	10/18888	0.00310671	0.0347819	0.027609	2048/348	2
GO:0006720	isoprenoid metabolic process	5/44	135/18888	1.50329e-05	0.000957361	0.00067211	3991/124/125/5950/5959	5		GO:0033209	tumor necrosis factor-mediated signaling pathway	5/161	117/18888	0.00329155	0.0366952	0.0291277	7114/355/115650/970/7293	5
GO:0042445	hormone metabolic process	6/44	240/18888	1.86316e-05	0.00112721	0.000791353	3991/124/125/5950/3952/5959	6		GO:0010721	negative regulation of cell development	8/161	288/18888	0.00334049	0.0370837	0.0294361	3135/3553/2048/28959/567/393/55365/54209	8
GO:0010884	positive regulation of lipid storage	3/44	27/18888	3.31768e-05	0.00191162	0.00134204	4023/948/1149	3		GO:0051651	maintenance of location in cell	7/161	228/18888	0.00345866	0.0381755	0.0303028	2512/7114/5777/126306/348/2760/5336	7
GO:0120254	olefinic compound metabolic process	5/44	162/18888	3.6161e-05	0.00198886	0.00139627	3991/124/125/5950/5959	5		GO:0006879	intracellular iron ion homeostasis	4/161	73/18888	0.00350665	0.0381755	0.0303028	57817/2512/3162/567	4
GO:0010743	regulation of macrophage derived foam cell differentiation	3/44	33/18888	6.12837e-05	0.00322405	0.00226343	4023/948/9370	3		GO:0042130	negative regulation of T cell proliferation	4/161	73/18888	0.00350665	0.0381755	0.0303028	3135/5777/10385/3133	4
GO:1905952	regulation of lipid localization	5/44	186/18888	6.97934e-05	0.00332416	0.00233371	4023/948/3952/9370/1149	5		GO:0140962	multicellular organismal-level chemical homeostasis	4/161	73/18888	0.00350665	0.0381755	0.0303028	57817/231/3162/567	4
GO:0032640	tumor necrosis factor production	5/44	189/18888	7.52824e-05	0.00332416	0.00233371	4023/948/3952/9370/1149	5		GO:1903706	regulation of hemopoiesis	10/161	424/18888	0.00351139	0.0381755	0.0303028	101/3106/3135/5777/10385/440712/28959/567/55365/54209	10
GO:0032680	regulation of tumor necrosis factor production	5/44	189/18888	7.52824e-05	0.00332416	0.00233371	4023/948/3952/9370/1149	5		GO:0050920	regulation of chemotaxis	7/161	229/18888	0.00354275	0.0383579	0.0304476	64805/7114/79890/7941/7852/54209/2358	7
GO:0015850	organic hydroxy compound transport	6/44	311/18888	7.91546e-05	0.00332416	0.00233371	5950/948/3952/9370/364/80704	6		GO:0007265	Ras protein signal transduction	5/161	120/18888	0.00366863	0.0393966	0.031272	10750/2048/115727/2889/22821	5
GO:0006869	lipid transport	7/44	456/18888	8.07725e-05	0.00332416	0.00233371	2167/5950/948/3952/9370/1149/63924	7		GO:0071346	cellular response to type II interferon	5/161	120/18888	0.00366863	0.0393966	0.031272	6368/84166/10062/730249/6362	5
GO:0006006	glucose metabolic process	5/44	192/18888	8.10986e-05	0.00332416	0.00233371	5105/5950/2819/3952/9370	5		GO:0002924	negative regulation of humoral immune response mediated by circulating immunoglobulin	2/161	11/18888	0.00377589	0.0397374	0.0315426	5777/1379	2
GO:0071706	tumor necrosis factor superfamily cytokine production	5/44	194/18888	8.51645e-05	0.00332416	0.00233371	4023/948/3952/9370/1149	5		GO:0010887	negative regulation of cholesterol storage	2/161	11/18888	0.00377589	0.0397374	0.0315426	10062/54209	2
GO:1903555	regulation of tumor necrosis factor superfamily cytokine production	5/44	194/18888	8.51645e-05	0.00332416	0.00233371	4023/948/3952/9370/1149	5		GO:0032836	glomerular basement membrane development	2/161	11/18888	0.00377589	0.0397374	0.0315426	1286/1285	2
GO:0010742	macrophage derived foam cell differentiation	3/44	40/18888	0.00010972	0.00408598	0.00286854	4023/948/9370	3		GO:1903365	regulation of fear response	2/161	11/18888	0.00377589	0.0397374	0.0315426	2048/348	2
GO:0016051	carbohydrate biosynthetic process	5/44	206/18888	0.000112965	0.00408598	0.00286854	5105/5950/2819/3952/9370	5		GO:2001171	positive regulation of ATP biosynthetic process	2/161	11/18888	0.00377589	0.0397374	0.0315426	7114/54209	2
GO:0006641	triglyceride metabolic process	4/44	108/18888	0.000115066	0.00408598	0.00286854	3991/5105/4023/63924	4		GO:0019722	calcium-mediated signaling	7/161	232/18888	0.00380438	0.0398778	0.031654	64805/6401/22821/7852/5336/54209/2358	7
GO:0090077	foam cell differentiation	3/44	41/18888	0.000118189	0.00408598	0.00286854	4023/948/9370	3		GO:0002637	regulation of immunoglobulin production	4/161	75/18888	0.00386486	0.040351	0.0320296	51237/2048/3133/7293	4
GO:0051235	maintenance of location	6/44	337/18888	0.000122966	0.00413303	0.00290157	130399/4023/948/3952/1149/63924	6		GO:0030098	lymphocyte differentiation	10/161	432/18888	0.00400409	0.0415842	0.0330085	7471/101/3135/3553/5777/57379/10385/567/338339/5336	10
GO:1905954	positive regulation of lipid localization	4/44	112/18888	0.000132455	0.00433163	0.003041	4023/948/9370/1149	4		GO:0032635	interleukin-6 production	6/161	176/18888	0.0040304	0.0415842	0.0330085	3106/3553/5777/11027/5336/54209	6
GO:0034284	response to monosaccharide	5/44	215/18888	0.000138029	0.00439514	0.00308558	130399/5105/4023/3952/9370	5		GO:0032675	regulation of interleukin-6 production	6/161	176/18888	0.0040304	0.0415842	0.0330085	3106/3553/5777/11027/5336/54209	6
GO:0044242	cellular lipid catabolic process	5/44	230/18888	0.000189037	0.005865	0.00411749	3991/5105/4023/3952/9370	5		GO:0046470	phosphatidylcholine metabolic process	4/161	76/18888	0.00405293	0.0416534	0.0330634	341/7941/10062/1071	4
GO:0019318	hexose metabolic process	5/44	232/18888	0.000196797	0.00595312	0.00417935	5105/5950/2819/3952/9370	5		GO:0030099	myeloid cell differentiation	10/161	439/18888	0.00447877	0.0454204	0.0360536	23601/5777/116071/440712/567/115727/5305/8837/54209/55509	10
GO:0071320	cellular response to cAMP	3/44	50/18888	0.000214154	0.00632015	0.00443703	5105/2819/9370	3		GO:0034135	regulation of toll-like receptor 2 signaling pathway	2/161	12/18888	0.00450579	0.0454204	0.0360536	730249/54209	2
GO:0009743	response to carbohydrate	5/44	239/18888	0.000225889	0.00650776	0.00456874	130399/5105/4023/3952/9370	5		GO:0034370	triglyceride-rich lipoprotein particle remodeling	2/161	12/18888	0.00450579	0.0454204	0.0360536	348/1071	2
GO:0045444	fat cell differentiation	5/44	248/18888	0.000267985	0.00742739	0.00521435	2167/4023/56301/3952/9370	5		GO:0034372	very-low-density lipoprotein particle remodeling	2/161	12/18888	0.00450579	0.0454204	0.0360536	348/1071	2
GO:0006639	acylglycerol metabolic process	4/44	136/18888	0.000279203	0.00742739	0.00521435	3991/5105/4023/63924	4		GO:0042364	water-soluble vitamin biosynthetic process	2/161	12/18888	0.00450579	0.0454204	0.0360536	27010/231	2
GO:0006638	neutral lipid metabolic process	4/44	137/18888	0.000287115	0.00742739	0.00521435	3991/5105/4023/63924	4		GO:0051056	regulation of small GTPase mediated signal transduction	8/161	304/18888	0.00461962	0.0463902	0.0368233	23526/2048/56990/348/393/115727/50619/22821	8
GO:0034219	carbohydrate transmembrane transport	4/44	137/18888	0.000287115	0.00742739	0.00521435	286753/3952/9370/364	4		GO:0016239	positive regulation of macroautophagy	4/161	79/18888	0.00465405	0.0465582	0.0369568	340061/285180/3162/5305	4
GO:0005996	monosaccharide metabolic process	5/44	252/18888	0.000288502	0.00742739	0.00521435	5105/5950/2819/3952/9370	5		GO:0009595	detection of biotic stimulus	3/161	40/18888	0.00476617	0.04732	0.0375614	3106/3105/54209	3
GO:0046883	regulation of hormone secretion	5/44	254/18888	0.000299198	0.00754227	0.00529501	130399/5950/3952/9370/4826	5		GO:0150077	regulation of neuroinflammatory response	3/161	40/18888	0.00476617	0.04732	0.0375614	3553/5336/54209	3
GO:0070542	response to fatty acid	3/44	57/18888	0.000316087	0.00780542	0.00547975	4023/948/9370	3
GO:0045598	regulation of fat cell differentiation	4/44	146/18888	0.000365742	0.00885095	0.00621376	4023/56301/3952/9370	4		LumA-ceRM5
GO:0032868	response to insulin	5/44	269/18888	0.000389327	0.00923697	0.00648476	130399/5105/286753/3952/9370	5		ID	Description	GeneRatio	BgRatio	pvalue	p.adjust	qvalue	geneID	Count
GO:0070417	cellular response to cold	2/44	13/18888	0.00040699	0.00947035	0.00664861	5346/1149	2		GO:0007059	chromosome segregation	106/351	423/18888	1.66418e-91	3.7161e-88	2.97625e-88	64151/116028/29899/1062/4751/5901/9787/1104/29127/7272/81610/7153/126731/220134/83990/79980/990/1063/3619/22974/157313/93323/11200/10403/64946/147841/81624/5347/348654/11130/84722/55706/54892/64105/9918/55835/259266/991/24137/10460/4288/4085/9700/898/55355/10051/4605/11004/57082/29128/9319/3832/55839/11065/113130/387103/6790/2177/1894/79172/54908/79682/81620/9232/9133/9735/23397/9493/9134/51203/9…	106
GO:0008643	carbohydrate transport	4/44	159/18888	0.00050501	0.0113313	0.00795504	286753/3952/9370/364	4		GO:0000280	nuclear division	100/351	446/18888	8.77376e-81	9.7959e-78	7.84559e-78	9088/64151/8438/1062/4751/5901/675/9787/1104/29127/7272/994/7153/126731/220134/83990/1111/1063/3619/22974/157313/2175/11200/146956/10403/147841/5347/348654/11130/84722/55706/54892/64105/9918/259266/991/24137/146691/4288/995/4085/9700/63979/898/10051/4605/79866/1164/11004/25788/57082/29128/9319/3832/54443/11065/113130/6790/2177/10635/54908/81620/9232/5888/9133/9735/23397/9493/9134/51203/983/55143/…	100
GO:0046888	negative regulation of hormone secretion	3/44	67/18888	0.000509172	0.0113313	0.00795504	130399/3952/9370	3		GO:0048285	organelle fission	102/351	493/18888	1.01975e-78	7.59034e-76	6.07914e-76	9088/64151/8438/1062/4751/5901/675/9787/1104/29127/7272/994/7153/126731/220134/83990/1111/1063/3619/22974/157313/2175/11200/146956/10403/147841/5347/348654/11130/84722/55706/54892/64105/9918/259266/991/24137/146691/4288/995/4085/9700/63979/898/10051/4605/79866/1164/11004/25788/57082/29128/9319/3832/192111/54443/11065/113130/6790/2177/10635/54908/81620/9232/5888/9133/9735/23397/9493/9134/51203/983…	102
GO:0051223	regulation of protein transport	6/44	440/18888	0.000515057	0.0113313	0.00795504	130399/5950/948/3952/9370/4826	6		GO:0098813	nuclear chromosome segregation	83/351	317/18888	1.74775e-72	9.75684e-70	7.8143e-70	64151/116028/1062/4751/5901/9787/29127/7272/81610/7153/126731/220134/83990/79980/990/1063/3619/22974/11200/10403/147841/5347/348654/11130/84722/55706/54892/64105/9918/259266/991/24137/10460/4085/9700/898/10051/4605/11004/57082/29128/9319/3832/11065/113130/6790/2177/1894/54908/81620/9232/9133/9735/23397/9493/9134/51203/983/55143/55166/3833/221150/83540/699/57405/2491/83903/146909/9928/55055/81930/…	83
GO:0010889	regulation of sequestering of triglyceride	2/44	15/18888	0.000546251	0.0118029	0.00828618	4023/1149	2		GO:0140014	mitotic nuclear division	78/351	277/18888	1.04915e-70	4.68552e-68	3.75266e-68	9088/64151/1062/4751/5901/9787/1104/29127/7272/126731/220134/1111/1063/3619/22974/157313/11200/10403/147841/5347/348654/11130/84722/54892/64105/9918/991/24137/146691/4288/995/4085/9700/10051/4605/79866/11004/57082/29128/9319/3832/54443/11065/113130/6790/54908/81620/9735/23397/9493/51203/983/55143/3833/221150/83540/9585/699/57405/2491/83903/27085/146909/9928/55055/81930/286151/348235/10615/3835/26…	78
GO:0050796	regulation of insulin secretion	4/44	167/18888	0.000607448	0.012895	0.00905283	130399/5950/3952/4826	4		GO:0000070	mitotic sister chromatid segregation	64/351	188/18888	8.75807e-64	3.25946e-61	2.61052e-61	64151/1062/4751/5901/9787/29127/7272/126731/220134/1063/3619/22974/11200/10403/147841/5347/348654/11130/84722/54892/64105/9918/991/24137/4085/9700/10051/4605/11004/57082/29128/9319/3832/11065/113130/54908/81620/9735/23397/9493/51203/983/55143/3833/221150/83540/699/57405/2491/83903/146909/9928/55055/81930/348235/10615/3835/26271/9055/332/9212/891/701/90417	64
GO:0030299	intestinal cholesterol absorption	2/44	16/18888	0.000623363	0.0130046	0.00912984	948/3952	2		GO:0000819	sister chromatid segregation	68/351	229/18888	3.45911e-63	1.10346e-60	8.83763e-61	64151/116028/1062/4751/5901/9787/29127/7272/7153/126731/220134/990/1063/3619/22974/11200/10403/147841/5347/348654/11130/84722/54892/64105/9918/991/24137/10460/4085/9700/10051/4605/11004/57082/29128/9319/3832/11065/113130/54908/81620/9735/23397/9493/51203/983/55143/3833/221150/83540/699/57405/2491/83903/146909/9928/55055/81930/348235/10615/3835/26271/9055/332/9212/891/701/90417	68
GO:0014823	response to activity	3/44	74/18888	0.000681221	0.0139708	0.00980812	5105/3952/9370	3		GO:0006260	DNA replication	71/351	278/18888	7.29354e-61	2.03581e-58	1.63049e-58	116028/54962/675/253714/10721/1111/990/5985/23649/8318/79915/146956/2237/1017/64785/1763/5426/10926/348654/5427/5983/374393/10535/7083/5557/4175/4176/10293/29980/8317/641/898/9768/5984/890/8208/5422/79733/51514/11073/79075/144455/10036/81620/5888/80119/8914/9134/983/51659/157570/84515/55388/6240/11169/580/993/4171/5982/90381/23594/26271/84296/5111/4173/5558/4172/9837/4174/4998/51053	71
GO:0046879	hormone secretion	5/44	311/18888	0.000751977	0.0151332	0.0106242	130399/5950/3952/9370/4826	5		GO:0006261	DNA-templated DNA replication	58/351	160/18888	1.30263e-59	3.23196e-57	2.58849e-57	54962/675/253714/10721/990/5985/23649/8318/79915/146956/2237/1017/64785/1763/5426/10926/348654/5427/5983/7083/5557/4175/4176/10293/29980/8317/641/898/5984/5422/79733/11073/79075/144455/81620/5888/8914/9134/51659/84515/55388/6240/11169/580/4171/5982/90381/23594/26271/84296/5111/4173/5558/4172/9837/4174/4998/51053	58
GO:0042886	amide transport	5/44	312/18888	0.000762912	0.0151332	0.0106242	130399/5950/3952/364/4826	5		GO:1901987	regulation of cell cycle phase transition	83/351	455/18888	1.17771e-58	2.62983e-56	2.10624e-56	9088/54962/1062/675/9787/7272/994/81610/83990/1111/54888/990/1063/3619/8318/79915/11200/146956/10403/1017/1763/147841/10926/5347/348654/51512/11130/6241/55835/991/995/4085/9700/29980/8317/641/898/57082/9319/2146/51514/11073/54443/11065/113130/6790/2177/144455/54908/81620/5888/9735/8914/9134/983/55143/63967/83540/699/57405/5933/83903/6240/79968/27085/580/993/9928/55055/4436/90381/1032/26271/332/96…	83
GO:0030730	sequestering of triglyceride	2/44	18/18888	0.000792438	0.0152555	0.0107101	4023/1149	2		GO:0044772	mitotic cell cycle phase transition	82/351	451/18888	8.4562e-58	1.71661e-55	1.37484e-55	9088/1062/9787/1104/7272/994/1111/990/1063/3619/79915/11200/10403/1017/147841/5426/10926/5347/348654/51512/11130/899/6241/55835/991/10460/995/4085/9700/29980/8317/641/898/1164/57082/890/9319/2146/51514/11073/54443/11065/113130/9833/2305/6790/144455/54908/1033/9133/9735/9134/6502/983/55143/63967/83540/84930/699/57405/5933/83903/6240/27085/580/993/128239/9928/55055/90381/1032/26271/332/4998/27338/1…	82
GO:0046323	glucose import	3/44	78/18888	0.000794297	0.0152555	0.0107101	286753/3952/9370	3		GO:0010948	negative regulation of cell cycle process	67/351	316/18888	1.46133e-51	2.7193e-49	2.1779e-49	9088/54962/4751/675/7272/83990/1111/54888/990/1063/3619/8318/11200/146956/10403/1017/1763/147841/5347/348654/51512/11130/899/991/146691/4085/9700/29980/641/57082/9319/79733/2146/51514/11073/2177/144455/54908/81620/5888/9735/8914/983/55143/63967/83540/699/57405/5933/83903/79968/27085/580/55055/4436/286151/90381/1032/26271/332/9656/4998/1869/9212/891/83695/701	67
GO:0097009	energy homeostasis	3/44	79/18888	0.000824313	0.0155847	0.0109411	130399/948/3952	3		GO:0000075	cell cycle checkpoint signaling	55/351	191/18888	3.74342e-50	6.43004e-48	5.14986e-48	54962/675/7272/83990/1111/54888/990/1063/3619/8318/11200/146956/10403/1017/1763/147841/5347/348654/51512/11130/991/4085/29980/641/57082/9319/51514/11073/2177/144455/54908/81620/5888/9735/8914/983/55143/63967/83540/699/57405/83903/79968/580/55055/4436/90381/332/9656/4998/1869/9212/891/83695/701	55
GO:0009914	hormone transport	5/44	322/18888	0.000878931	0.0157363	0.0110476	130399/5950/3952/9370/4826	5		GO:1901988	negative regulation of cell cycle phase transition	60/351	273/18888	4.38234e-47	6.98983e-45	5.59819e-45	9088/54962/675/7272/83990/1111/54888/990/1063/3619/8318/11200/146956/10403/1017/1763/147841/5347/348654/51512/11130/991/4085/29980/641/57082/9319/2146/51514/11073/2177/144455/54908/81620/5888/9735/8914/983/55143/63967/83540/699/57405/5933/83903/79968/580/55055/4436/90381/1032/26271/332/9656/4998/1869/9212/891/83695/701	60
GO:0010744	positive regulation of macrophage derived foam cell differentiation	2/44	19/18888	0.000884356	0.0157363	0.0110476	4023/948	2		GO:1901990	regulation of mitotic cell cycle phase transition	66/351	356/18888	8.60113e-47	1.28042e-44	1.0255e-44	9088/1062/9787/7272/994/1111/990/1063/3619/79915/11200/10403/1017/147841/5347/348654/51512/11130/6241/55835/991/995/4085/9700/29980/8317/641/898/57082/9319/2146/51514/11073/54443/11065/113130/6790/144455/54908/9735/9134/983/55143/63967/83540/699/57405/5933/83903/6240/27085/580/993/9928/55055/90381/1032/26271/332/4998/163786/1869/9212/891/701/6491	66
GO:0010885	regulation of cholesterol storage	2/44	19/18888	0.000884356	0.0157363	0.0110476	4023/948	2		GO:0045786	negative regulation of cell cycle	68/351	405/18888	2.82941e-45	3.94879e-43	3.16261e-43	9088/54962/4751/675/7272/83990/1111/54888/990/1063/3619/8318/11200/146956/10403/1017/1763/147841/5347/348654/51512/11130/899/991/146691/4085/9700/29980/641/57082/9319/79733/2146/51514/11073/2177/144455/54908/81620/5888/9735/8914/983/55143/63967/83540/699/57405/5933/83903/79968/27085/580/55055/4436/286151/90381/1032/26271/332/9656/4998/51053/1869/9212/891/83695/701	68
GO:0033194	response to hydroperoxide	2/44	19/18888	0.000884356	0.0157363	0.0110476	948/2878	2		GO:0090068	positive regulation of cell cycle process	56/351	263/18888	4.09724e-43	5.38184e-41	4.31034e-41	64151/29899/9787/29127/994/81610/990/3619/79915/10403/2237/10926/348654/6241/54892/9918/55835/991/10733/995/4085/9700/8317/898/10051/57082/79733/2146/51514/11065/113130/6790/1894/10635/144455/23397/9493/9134/51203/983/55143/9585/699/6240/27085/993/9928/10615/26271/332/163786/11113/9212/891/83695/6491	56
GO:0019216	regulation of lipid metabolic process	5/44	326/18888	0.00092885	0.0162885	0.0114353	5105/3952/9370/1149/63924	5		GO:0007088	regulation of mitotic nuclear division	42/351	118/18888	8.44793e-43	1.04801e-40	8.39359e-41	9088/4751/9787/1104/7272/1111/1063/3619/157313/10403/147841/5347/348654/11130/991/146691/4288/995/4085/9700/79866/57082/9319/11065/6790/54908/9735/51203/55143/83540/9585/699/57405/83903/27085/55055/286151/26271/332/9212/891/701	42
GO:0006071	glycerol metabolic process	2/44	20/18888	0.000981165	0.016489	0.011576	5105/3952	2		GO:0007093	mitotic cell cycle checkpoint signaling	44/351	143/18888	1.38185e-41	1.62404e-39	1.3007e-39	54962/7272/1111/990/1063/3619/11200/146956/10403/1017/147841/5347/348654/51512/11130/991/4085/29980/641/57082/9319/51514/11073/2177/144455/54908/9735/983/55143/63967/83540/699/57405/83903/580/55055/4436/90381/332/9656/4998/9212/891/701	44
GO:0044241	lipid digestion	2/44	20/18888	0.000981165	0.016489	0.011576	948/3952	2		GO:1902850	microtubule cytoskeleton organization involved in mitosis	46/351	164/18888	2.23151e-41	2.49148e-39	1.99544e-39	29899/1062/4751/5901/9787/1104/29127/7272/126731/1058/3619/22974/284403/11200/10403/64946/5347/84722/55835/991/24137/10460/4085/9700/4605/79866/29128/3832/3925/6790/54908/9493/51203/983/55143/3833/83540/57405/9055/332/89958/163786/9212/891/9793/6491	46
GO:0098856	intestinal lipid absorption	2/44	20/18888	0.000981165	0.016489	0.011576	948/3952	2		GO:0045787	positive regulation of cell cycle	59/351	332/18888	1.14956e-40	1.22237e-38	9.79e-39	64151/29899/675/9787/29127/994/81610/1111/990/3619/79915/10403/2237/10926/348654/84722/6241/54892/9918/55835/991/10733/995/4085/9700/8317/898/10051/57082/79733/2146/51514/11065/113130/6790/1894/10635/144455/23397/9493/9134/51203/983/55143/9585/699/6240/27085/993/9928/10615/26271/332/163786/11113/9212/891/83695/6491	59
GO:0051591	response to cAMP	3/44	85/18888	0.00101961	0.0169003	0.0118648	5105/2819/9370	3		GO:0007051	spindle organization	48/351	197/18888	5.95743e-40	6.04679e-38	4.8429e-38	29899/1062/4751/5901/9787/1104/29127/7272/126731/3619/22974/93323/284403/11200/10403/64946/5347/84722/55835/259266/991/24137/10460/9700/4605/79866/29128/3832/3925/6790/9133/9493/55143/3833/83540/57405/203068/10615/26271/9055/332/163786/79000/9212/891/9793/90417/6491	48
GO:0006067	ethanol metabolic process	2/44	21/18888	0.00108284	0.0177059	0.0124303	124/125	2		GO:0051783	regulation of nuclear division	43/351	147/18888	1.38737e-39	1.34695e-37	1.07878e-37	9088/4751/9787/1104/7272/1111/1063/3619/157313/10403/147841/5347/348654/11130/991/146691/4288/995/4085/9700/79866/57082/9319/11065/6790/10635/54908/9735/51203/55143/83540/9585/699/57405/83903/27085/55055/286151/26271/332/9212/891/701	43
GO:0090276	regulation of peptide hormone secretion	4/44	197/18888	0.00112444	0.018141	0.0127358	130399/5950/3952/4826	4		GO:0051983	regulation of chromosome segregation	41/351	131/18888	3.93103e-39	3.6575e-37	2.92931e-37	64151/116028/1062/9787/7272/990/1063/3619/157313/10403/147841/5347/348654/11130/54892/9918/991/10460/4288/4085/9700/10051/11004/57082/9319/11065/54908/9735/23397/983/55143/83540/699/57405/83903/55055/26271/332/9212/891/701	41
GO:0002791	regulation of peptide secretion	4/44	200/18888	0.00118904	0.0186849	0.0131176	130399/5950/3952/4826	4		GO:1905818	regulation of chromosome separation	33/351	74/18888	9.57246e-38	8.55012e-36	6.84784e-36	64151/9787/7272/1063/3619/10403/147841/5347/348654/11130/54892/9918/991/4085/9700/10051/57082/9319/11065/54908/9735/23397/55143/83540/699/57405/83903/55055/26271/332/9212/891/701	33
GO:0030073	insulin secretion	4/44	200/18888	0.00118904	0.0186849	0.0131176	130399/5950/3952/4826	4		GO:0045930	negative regulation of mitotic cell cycle	50/351	248/18888	2.90589e-37	2.49571e-35	1.99883e-35	9088/54962/7272/1111/990/1063/3619/11200/146956/10403/1017/147841/5347/348654/51512/11130/991/146691/4085/29980/641/57082/9319/2146/51514/11073/2177/144455/54908/9735/983/55143/63967/83540/699/57405/5933/83903/27085/580/55055/4436/90381/26271/332/9656/4998/9212/891/701	50
GO:0090087	regulation of peptide transport	4/44	202/18888	0.00123352	0.019	0.0133388	130399/5950/3952/4826	4		GO:0051310	metaphase chromosome alignment	36/351	100/18888	5.43941e-37	4.49859e-35	3.60295e-35	1062/4751/29127/81610/220134/79980/1063/3619/10403/147841/11130/84722/11004/57082/113130/1894/54908/81620/9735/55143/55166/3833/221150/83540/57405/9928/55055/81930/348235/10615/3835/151648/332/9212/891/90417	36
GO:0097006	regulation of plasma lipoprotein particle levels	3/44	91/18888	0.00124196	0.019	0.0133388	4023/948/9370	3		GO:0007052	mitotic spindle organization	39/351	131/18888	2.70854e-36	2.16006e-34	1.73e-34	29899/1062/4751/5901/9787/1104/29127/7272/126731/3619/22974/284403/11200/10403/64946/5347/84722/55835/991/24137/10460/4605/79866/29128/3832/3925/6790/9493/55143/3833/83540/57405/9055/332/163786/9212/891/9793/6491	39
GO:0009749	response to glucose	4/44	203/18888	0.0012562	0.019	0.0133388	130399/5105/4023/9370	4		GO:0051304	chromosome separation	33/351	81/18888	4.02669e-36	3.10055e-34	2.48325e-34	64151/9787/7272/1063/3619/10403/147841/5347/348654/11130/54892/9918/991/4085/9700/10051/57082/9319/11065/54908/9735/23397/55143/83540/699/57405/83903/55055/26271/332/9212/891/701	33
GO:0019400	alditol metabolic process	2/44	23/18888	0.00130071	0.0193305	0.0135709	5105/3952	2		GO:0050000	chromosome localization	37/351	120/18888	4.15693e-35	3.09414e-33	2.47811e-33	1062/4751/9787/29127/81610/220134/79980/1063/3619/10403/147841/11130/84722/11004/57082/113130/1894/54908/81620/9735/55143/55166/3833/221150/83540/57405/9928/55055/81930/348235/10615/3835/151648/332/9212/891/90417	37
GO:0009895	negative regulation of catabolic process	5/44	353/18888	0.00132317	0.0193305	0.0135709	3240/3952/7079/1149/63924	5		GO:0051303	establishment of chromosome localization	36/351	112/18888	6.3583e-35	4.58002e-33	3.66816e-33	1062/4751/29127/81610/220134/79980/1063/3619/10403/147841/11130/84722/11004/57082/113130/1894/54908/81620/9735/55143/55166/3833/221150/83540/57405/9928/55055/81930/348235/10615/3835/151648/332/9212/891/90417	36
GO:0032869	cellular response to insulin stimulus	4/44	206/18888	0.00132598	0.0193305	0.0135709	5105/286753/3952/9370	4		GO:0045839	negative regulation of mitotic nuclear division	28/351	56/18888	5.55153e-34	3.87392e-32	3.10265e-32	7272/1111/1063/3619/10403/147841/5347/348654/11130/991/146691/4085/57082/9319/54908/9735/55143/83540/699/57405/83903/27085/55055/26271/332/9212/891/701	28
GO:0097194	execution phase of apoptosis	3/44	94/18888	0.00136371	0.019559	0.0137313	130399/1149/63924	3		GO:1901991	negative regulation of mitotic cell cycle phase transition	43/351	195/18888	7.51656e-34	5.08621e-32	4.07357e-32	9088/7272/1111/990/1063/3619/11200/10403/1017/147841/5347/348654/51512/11130/991/4085/29980/641/57082/9319/2146/51514/11073/144455/54908/9735/983/55143/63967/83540/699/57405/5933/83903/580/55055/90381/26271/332/4998/9212/891/701	43
GO:0009746	response to hexose	4/44	208/18888	0.00137398	0.019559	0.0137313	130399/5105/4023/9370	4		GO:0051784	negative regulation of nuclear division	29/351	63/18888	8.55038e-34	5.61559e-32	4.49755e-32	7272/1111/1063/3619/10403/147841/5347/348654/11130/991/146691/4085/57082/9319/54908/9735/55143/83540/699/57405/83903/27085/55055/286151/26271/332/9212/891/701	29
GO:0010878	cholesterol storage	2/44	25/18888	0.00153779	0.0213877	0.0150151	4023/948	2		GO:0010965	regulation of mitotic sister chromatid separation	28/351	59/18888	3.81894e-33	2.43648e-31	1.95139e-31	9787/7272/1063/3619/10403/147841/5347/348654/11130/991/4085/9700/57082/9319/11065/54908/9735/55143/83540/699/57405/83903/55055/26271/332/9212/891/701	28
GO:0090335	regulation of brown fat cell differentiation	2/44	25/18888	0.00153779	0.0213877	0.0150151	56301/3952	2		GO:1903046	meiotic cell cycle process	44/351	218/18888	7.34919e-33	4.55854e-31	3.65096e-31	9088/8438/675/7272/994/7153/83990/54888/3619/2175/146956/10403/5347/11130/55706/9918/259266/991/995/9700/63979/898/10051/1164/25788/57082/9319/6790/2177/10635/9232/5888/9133/23397/9134/2956/83540/84930/993/81930/286151/84057/26271/151648	44
GO:1903828	negative regulation of protein localization	4/44	216/18888	0.00157818	0.0215197	0.0151078	130399/948/9370/56246	4		GO:0033044	regulation of chromosome organization	46/351	247/18888	1.10558e-32	6.67232e-31	5.3439e-31	64151/116028/1062/4751/9787/7272/1736/7153/990/22948/3181/1063/3619/10403/2237/1017/147841/5347/348654/11130/54892/9918/991/10460/4085/9700/10051/57082/9319/11065/54908/9735/80119/23397/983/55143/83540/699/57405/83903/55055/26271/332/9212/891/701	46
GO:0098869	cellular oxidant detoxification	3/44	99/18888	0.00158286	0.0215197	0.0151078	3240/948/2878	3		GO:0051321	meiotic cell cycle	49/351	291/18888	1.25444e-32	7.37148e-31	5.90385e-31	9088/8438/4751/675/7272/994/7153/83990/54888/3619/2175/146956/10403/1017/5347/11130/7516/55706/9918/259266/991/995/9700/63979/898/10051/1164/25788/57082/9319/9156/6790/2177/10635/9232/5888/9133/23397/9134/2956/83540/84930/151246/993/81930/286151/84057/26271/151648	49
GO:0032755	positive regulation of interleukin-6 production	3/44	101/18888	0.00167633	0.0225373	0.0158222	4023/948/3952	3		GO:0006310	DNA recombination	52/351	339/18888	1.58347e-32	9.06635e-31	7.26129e-31	116028/8438/3148/55345/675/7153/83990/253714/10721/1111/8318/79915/146956/2237/348654/7516/4175/4176/63979/8317/641/25788/29128/9319/10213/9156/2187/11073/7468/3838/2177/10635/5888/80119/8914/51659/78995/2956/84515/580/4171/4436/84057/3149/84296/4173/4172/4174/7374/79000/55010/83695	52
GO:1901653	cellular response to peptide	5/44	376/18888	0.00174697	0.023229	0.0163078	5105/948/286753/3952/9370	5		GO:0051306	mitotic sister chromatid separation	28/351	62/18888	2.29576e-32	1.28161e-30	1.02645e-30	9787/7272/1063/3619/10403/147841/5347/348654/11130/991/4085/9700/57082/9319/11065/54908/9735/55143/83540/699/57405/83903/55055/26271/332/9212/891/701	28
GO:0022600	digestive system process	3/44	104/18888	0.00182291	0.0239752	0.0168317	5950/948/3952	3		GO:0044786	cell cycle DNA replication	25/351	45/18888	5.13144e-32	2.79476e-30	2.23833e-30	54962/675/8318/79915/2237/64785/1763/10926/7083/4175/29980/8317/641/5422/79733/144455/81620/5888/4171/26271/5111/4173/4172/9837/51053	25
GO:0009062	fatty acid catabolic process	3/44	106/18888	0.00192494	0.024314	0.0170695	5105/3952/9370	3		GO:0033045	regulation of sister chromatid segregation	33/351	104/18888	7.13759e-32	3.79482e-30	3.03929e-30	116028/1062/9787/7272/990/1063/3619/10403/147841/5347/348654/11130/991/10460/4085/9700/57082/9319/11065/54908/9735/983/55143/83540/699/57405/83903/55055/26271/332/9212/891/701	33
GO:0032526	response to retinoic acid	3/44	106/18888	0.00192494	0.024314	0.0170695	5105/5950/3952	3		GO:0006270	DNA replication initiation	23/351	37/18888	3.62505e-31	1.87584e-29	1.50237e-29	990/23649/8318/1017/64785/5557/4175/4176/898/5422/11073/81620/9134/55388/4171/90381/23594/4173/5558/4172/4174/4998/51053	23
GO:0019433	triglyceride catabolic process	2/44	28/18888	0.00192904	0.024314	0.0170695	3991/4023	2		GO:0006302	double-strand break repair	49/351	312/18888	3.69623e-31	1.87584e-29	1.50237e-29	116028/8438/3148/55345/675/83990/253714/10721/1111/8318/11200/146956/2237/1763/5347/348654/7516/4175/4176/63979/8317/641/25788/29128/5422/9319/10213/2187/11073/113130/7468/2305/2177/10635/5888/8914/51659/157570/84515/4171/4436/64858/84296/4173/4172/4174/79000/55010/83695	49
GO:0050995	negative regulation of lipid catabolic process	2/44	28/18888	0.00192904	0.024314	0.0170695	1149/63924	2		GO:0033047	regulation of mitotic sister chromatid segregation	26/351	54/18888	4.59639e-31	2.17177e-29	1.73938e-29	7272/1063/3619/10403/147841/5347/348654/11130/991/4085/57082/9319/54908/9735/983/55143/83540/699/57405/83903/55055/26271/332/9212/891/701	26
GO:0032760	positive regulation of tumor necrosis factor production	3/44	109/18888	0.00208456	0.0260033	0.0182555	4023/948/3952	3		GO:0033046	negative regulation of sister chromatid segregation	25/351	48/18888	4.76564e-31	2.17177e-29	1.73938e-29	7272/1063/3619/10403/147841/5347/348654/11130/991/4085/57082/9319/54908/9735/55143/83540/699/57405/83903/55055/26271/332/9212/891/701	25
GO:0072593	reactive oxygen species metabolic process	4/44	238/18888	0.00224741	0.0274871	0.0192972	3240/948/3952/2878	4		GO:0033048	negative regulation of mitotic sister chromatid segregation	25/351	48/18888	4.76564e-31	2.17177e-29	1.73938e-29	7272/1063/3619/10403/147841/5347/348654/11130/991/4085/57082/9319/54908/9735/55143/83540/699/57405/83903/55055/26271/332/9212/891/701	25
GO:0046486	glycerolipid metabolic process	5/44	400/18888	0.00228798	0.0274871	0.0192972	3991/5105/4023/2819/63924	5		GO:0045841	negative regulation of mitotic metaphase/anaphase transition	25/351	48/18888	4.76564e-31	2.17177e-29	1.73938e-29	7272/1063/3619/10403/147841/5347/348654/11130/991/4085/57082/9319/54908/9735/55143/83540/699/57405/83903/55055/26271/332/9212/891/701	25
GO:1903557	positive regulation of tumor necrosis factor superfamily cytokine production	3/44	113/18888	0.00230989	0.0274871	0.0192972	4023/948/3952	3		GO:2000816	negative regulation of mitotic sister chromatid separation	25/351	48/18888	4.76564e-31	2.17177e-29	1.73938e-29	7272/1063/3619/10403/147841/5347/348654/11130/991/4085/57082/9319/54908/9735/55143/83540/699/57405/83903/55055/26271/332/9212/891/701	25
GO:0006631	fatty acid metabolic process	5/44	401/18888	0.00231289	0.0274871	0.0192972	5105/4023/948/3952/9370	5		GO:0007091	metaphase/anaphase transition of mitotic cell cycle	31/351	94/18888	1.35135e-30	6.03514e-29	4.83358e-29	1062/9787/7272/990/1063/3619/10403/147841/5347/348654/11130/991/10460/4085/9700/57082/9319/11065/54908/9735/55143/83540/699/57405/83903/55055/26271/332/9212/891/701	31
GO:0071356	cellular response to tumor necrosis factor	4/44	241/18888	0.00235173	0.0274871	0.0192972	5105/2167/2819/9370	4		GO:0051985	negative regulation of chromosome segregation	25/351	50/18888	1.88179e-30	7.92839e-29	6.34989e-29	7272/1063/3619/10403/147841/5347/348654/11130/991/4085/57082/9319/54908/9735/55143/83540/699/57405/83903/55055/26271/332/9212/891/701	25
GO:0030262	apoptotic nuclear changes	2/44	31/18888	0.00236253	0.0274871	0.0192972	130399/1149	2		GO:1902100	negative regulation of metaphase/anaphase transition of cell cycle	25/351	50/18888	1.88179e-30	7.92839e-29	6.34989e-29	7272/1063/3619/10403/147841/5347/348654/11130/991/4085/57082/9319/54908/9735/55143/83540/699/57405/83903/55055/26271/332/9212/891/701	25
GO:0042744	hydrogen peroxide catabolic process	2/44	31/18888	0.00236253	0.0274871	0.0192972	3240/2878	2		GO:1905819	negative regulation of chromosome separation	25/351	50/18888	1.88179e-30	7.92839e-29	6.34989e-29	7272/1063/3619/10403/147841/5347/348654/11130/991/4085/57082/9319/54908/9735/55143/83540/699/57405/83903/55055/26271/332/9212/891/701	25
GO:0030072	peptide hormone secretion	4/44	242/18888	0.00238723	0.02751	0.0193132	130399/5950/3952/4826	4		GO:0044784	metaphase/anaphase transition of cell cycle	31/351	97/18888	4.14241e-30	1.71296e-28	1.37192e-28	1062/9787/7272/990/1063/3619/10403/147841/5347/348654/11130/991/10460/4085/9700/57082/9319/11065/54908/9735/55143/83540/699/57405/83903/55055/26271/332/9212/891/701	31
GO:0015908	fatty acid transport	3/44	115/18888	0.00242799	0.0277158	0.0194577	2167/948/3952	3		GO:0008608	attachment of spindle microtubules to kinetochore	25/351	52/18888	6.87454e-30	2.74192e-28	2.19602e-28	1062/4751/29127/220134/79980/3619/10403/147841/11004/57082/1894/81620/9735/55143/221150/83540/57405/55055/348235/10615/151648/332/9212/891/90417	25
GO:0090317	negative regulation of intracellular protein transport	2/44	32/18888	0.00251631	0.028004	0.0196601	948/9370	2		GO:0007094	mitotic spindle assembly checkpoint signaling	24/351	46/18888	7.12187e-30	2.74192e-28	2.19602e-28	7272/1063/3619/10403/147841/5347/348654/11130/991/4085/57082/9319/54908/9735/55143/83540/699/57405/83903/55055/332/9212/891/701	24
GO:0002790	peptide secretion	4/44	247/18888	0.00257031	0.028004	0.0196601	130399/5950/3952/4826	4		GO:0071173	spindle assembly checkpoint signaling	24/351	46/18888	7.12187e-30	2.74192e-28	2.19602e-28	7272/1063/3619/10403/147841/5347/348654/11130/991/4085/57082/9319/54908/9735/55143/83540/699/57405/83903/55055/332/9212/891/701	24
GO:0051224	negative regulation of protein transport	3/44	118/18888	0.00261208	0.028004	0.0196601	130399/948/9370	3		GO:0071174	mitotic spindle checkpoint signaling	24/351	46/18888	7.12187e-30	2.74192e-28	2.19602e-28	7272/1063/3619/10403/147841/5347/348654/11130/991/4085/57082/9319/54908/9735/55143/83540/699/57405/83903/55055/332/9212/891/701	24
GO:1904659	glucose transmembrane transport	3/44	118/18888	0.00261208	0.028004	0.0196601	286753/3952/9370	3		GO:0030071	regulation of mitotic metaphase/anaphase transition	30/351	90/18888	8.4046e-30	3.18093e-28	2.54762e-28	1062/9787/7272/990/1063/3619/10403/147841/5347/348654/11130/991/4085/9700/57082/9319/11065/54908/9735/55143/83540/699/57405/83903/55055/26271/332/9212/891/701	30
GO:0006921	cellular component disassembly involved in execution phase of apoptosis	2/44	33/18888	0.0026747	0.028004	0.0196601	130399/1149	2		GO:0031577	spindle checkpoint signaling	24/351	47/18888	1.43111e-29	5.32611e-28	4.2657e-28	7272/1063/3619/10403/147841/5347/348654/11130/991/4085/57082/9319/54908/9735/55143/83540/699/57405/83903/55055/332/9212/891/701	24
GO:0042573	retinoic acid metabolic process	2/44	33/18888	0.0026747	0.028004	0.0196601	124/125	2		GO:1902099	regulation of metaphase/anaphase transition of cell cycle	30/351	93/18888	2.61265e-29	9.56403e-28	7.65988e-28	1062/9787/7272/990/1063/3619/10403/147841/5347/348654/11130/991/4085/9700/57082/9319/11065/54908/9735/55143/83540/699/57405/83903/55055/26271/332/9212/891/701	30
GO:0043171	peptide catabolic process	2/44	33/18888	0.0026747	0.028004	0.0196601	29953/206338	2		GO:0090329	regulation of DNA-templated DNA replication	24/351	48/18888	2.81456e-29	1.0137e-27	8.11874e-28	54962/5985/1017/10926/5983/4175/4176/8317/641/5984/79733/79075/144455/81620/8914/4171/5982/90381/26271/5111/4173/4172/4174/51053	24
GO:1990748	cellular detoxification	3/44	119/18888	0.0026753	0.028004	0.0196601	3240/948/2878	3		GO:0032392	DNA geometric change	29/351	85/18888	3.49628e-29	1.23924e-27	9.9251e-28	3148/55345/7153/83990/10721/5985/3181/8318/64785/1763/5983/4175/4176/641/5984/25788/79075/5888/80119/51659/84515/4171/5982/3149/84296/4173/4172/9837/4174	29
GO:0016054	organic acid catabolic process	4/44	250/18888	0.00268468	0.028004	0.0196601	5105/3952/9370/10840	4		GO:0071103	DNA conformation change	29/351	92/18888	4.92616e-28	1.71877e-26	1.37657e-26	3148/55345/7153/83990/10721/5985/3181/8318/64785/1763/5983/4175/4176/641/5984/25788/79075/5888/80119/51659/84515/4171/5982/3149/84296/4173/4172/9837/4174	29
GO:0046395	carboxylic acid catabolic process	4/44	250/18888	0.00268468	0.028004	0.0196601	5105/3952/9370/10840	4		GO:0033260	nuclear DNA replication	22/351	41/18888	7.65388e-28	2.6294e-26	2.1059e-26	54962/675/8318/79915/2237/64785/1763/10926/7083/4175/29980/8317/641/5422/81620/5888/4171/5111/4173/4172/9837/51053	22
GO:0008645	hexose transmembrane transport	3/44	121/18888	0.00280458	0.0290046	0.0203625	286753/3952/9370	3		GO:0140013	meiotic nuclear division	38/351	197/18888	1.05369e-27	3.56498e-26	2.85521e-26	8438/675/7272/994/7153/83990/3619/2175/146956/10403/5347/11130/55706/259266/991/9700/63979/898/10051/1164/25788/57082/9319/6790/2177/10635/9232/5888/9133/23397/9134/83540/84930/81930/286151/84057/26271/151648	38
GO:0034383	low-density lipoprotein particle clearance	2/44	34/18888	0.00283768	0.0290982	0.0204282	948/9370	2		GO:0044839	cell cycle G2/M phase transition	34/351	152/18888	3.77386e-27	1.25776e-25	1.00735e-25	9088/994/1111/990/1063/79915/11200/10403/1017/5347/995/29980/8317/641/890/51514/11073/9833/2305/6790/9133/6502/983/63967/84930/6240/580/993/9928/90381/26271/4998/9212/891	34
GO:0015749	monosaccharide transmembrane transport	3/44	123/18888	0.00293765	0.0298703	0.0209703	286753/3952/9370	3		GO:2001251	negative regulation of chromosome organization	28/351	93/18888	1.80007e-26	5.91112e-25	4.73425e-25	7272/7153/1063/3619/10403/147841/5347/348654/11130/991/4085/9700/57082/9319/54908/9735/80119/55143/83540/699/57405/83903/55055/26271/332/9212/891/701	28
GO:0034389	lipid droplet organization	2/44	35/18888	0.00300521	0.0300671	0.0211084	1149/63924	2		GO:0006275	regulation of DNA replication	31/351	128/18888	5.61318e-26	1.81655e-24	1.45489e-24	54962/990/5985/79915/1017/1763/10926/5983/4175/4176/8317/641/5984/890/79733/79075/144455/81620/8914/983/157570/993/4171/5982/90381/26271/5111/4173/4172/4174/51053	31
GO:0042593	glucose homeostasis	4/44	258/18888	0.00300671	0.0300671	0.0211084	5105/5950/3952/9370	4		GO:0051225	spindle assembly	31/351	129/18888	7.2669e-26	2.31814e-24	1.85661e-24	29899/4751/1104/29127/126731/3619/22974/93323/11200/10403/5347/55835/259266/991/24137/4605/29128/3832/6790/9133/9493/55143/3833/203068/10615/26271/9055/332/163786/9212/6491	31
GO:0033500	carbohydrate homeostasis	4/44	259/18888	0.00304874	0.0302375	0.0212281	5105/5950/3952/9370	4		GO:0032508	DNA duplex unwinding	26/351	79/18888	8.35782e-26	2.62859e-24	2.10525e-24	55345/7153/83990/10721/5985/8318/64785/1763/5983/4175/4176/641/5984/25788/79075/5888/80119/51659/84515/4171/5982/84296/4173/4172/9837/4174	26
GO:0009636	response to toxic substance	4/44	260/18888	0.00309117	0.0304091	0.0213485	10249/3240/948/2878	4		GO:0000725	recombinational repair	35/351	181/18888	1.26778e-25	3.93188e-24	3.14906e-24	116028/8438/55345/675/253714/10721/1111/8318/2237/348654/7516/4175/4176/63979/8317/641/25788/29128/10213/2187/11073/10635/5888/8914/51659/78995/84515/4171/84296/4173/4172/4174/79000/55010/83695	35
GO:0002021	response to dietary excess	2/44	36/18888	0.0031773	0.0310043	0.0217664	130399/3952	2		GO:0031570	DNA integrity checkpoint signaling	31/351	134/18888	2.55024e-25	7.80095e-24	6.24782e-24	54962/675/83990/1111/990/8318/11200/146956/1017/1763/5347/51512/29980/641/51514/11073/2177/144455/81620/5888/8914/983/63967/79968/580/4436/90381/9656/4998/1869/83695	31
GO:0034612	response to tumor necrosis factor	4/44	263/18888	0.00322089	0.0311783	0.0218885	5105/2167/2819/9370	4		GO:0000086	G2/M transition of mitotic cell cycle	31/351	136/18888	4.14746e-25	1.25152e-23	1.00235e-23	9088/994/1111/990/1063/11200/1017/5347/995/29980/8317/641/890/51514/11073/9833/2305/6790/6502/983/63967/84930/6240/580/993/9928/90381/26271/4998/9212/891	31
GO:0046683	response to organophosphorus	3/44	128/18888	0.0032872	0.0315676	0.0221618	5105/2819/9370	3		GO:0061982	meiosis I cell cycle process	30/351	139/18888	1.38597e-23	4.12648e-22	3.30492e-22	9088/8438/675/994/7153/83990/146956/10403/5347/11130/55706/991/995/9700/898/1164/25788/57082/9319/6790/2177/10635/9232/5888/9133/9134/2956/993/84057/26271	30
GO:0071404	cellular response to low-density lipoprotein particle stimulus	2/44	37/18888	0.0033539	0.0317211	0.0222696	4023/948	2		GO:0140694	non-membrane-bounded organelle assembly	46/351	413/18888	9.11603e-23	2.67843e-21	2.14517e-21	29899/1062/4751/9787/1104/29127/126731/1058/1063/3619/22974/22995/93323/284403/11200/10403/64946/1017/81624/5347/64105/55835/259266/991/24137/10733/4605/29128/3832/54443/387103/6790/55299/9133/9735/9493/55143/3833/203068/10615/26271/9055/332/163786/9212/6491	46
GO:0097237	cellular response to toxic substance	3/44	129/18888	0.00336004	0.0317211	0.0222696	3240/948/2878	3		GO:0000724	double-strand break repair via homologous recombination	32/351	176/18888	1.21681e-22	3.52875e-21	2.8262e-21	116028/8438/675/253714/10721/1111/8318/2237/348654/7516/4175/4176/63979/8317/641/25788/29128/10213/2187/11073/10635/5888/8914/51659/84515/4171/84296/4173/4172/4174/79000/55010	32
GO:0043434	response to peptide hormone	5/44	438/18888	0.00338184	0.0317211	0.0222696	130399/5105/286753/3952/9370	5		GO:0051656	establishment of organelle localization	47/351	472/18888	3.45817e-21	9.90011e-20	7.92905e-20	29899/1062/4751/5901/29127/81610/220134/79980/1058/1063/3619/10403/84823/147841/5347/11130/84722/4085/9700/11004/57082/113130/7514/1894/54908/81620/9735/51203/55143/4001/55166/3833/221150/83540/57405/9928/55055/81930/348235/10615/3835/151648/332/89958/9212/891/90417	47
GO:0050708	regulation of protein secretion	4/44	269/18888	0.00349143	0.0318955	0.022392	130399/5950/3952/4826	4		GO:0010389	regulation of G2/M transition of mitotic cell cycle	25/351	104/18888	4.46473e-21	1.26199e-19	1.01074e-19	9088/994/1111/990/1063/1017/5347/995/29980/8317/641/51514/11073/6790/983/63967/6240/580/993/9928/90381/26271/4998/9212/891	25
GO:0072329	monocarboxylic acid catabolic process	3/44	131/18888	0.00350867	0.0318955	0.022392	5105/3952/9370	3		GO:1902749	regulation of cell cycle G2/M phase transition	26/351	116/18888	4.90533e-21	1.3692e-19	1.0966e-19	9088/994/1111/990/1063/79915/1017/5347/995/29980/8317/641/51514/11073/6790/983/63967/6240/580/993/9928/90381/26271/4998/9212/891	26
GO:0046461	neutral lipid catabolic process	2/44	38/18888	0.00353501	0.0318955	0.022392	3991/4023	2		GO:0007080	mitotic metaphase chromosome alignment	20/351	60/18888	2.9983e-20	8.26569e-19	6.62003e-19	1062/220134/3619/10403/84722/11004/113130/54908/81620/55143/3833/221150/83540/9928/81930/348235/3835/332/9212/891	20
GO:0046464	acylglycerol catabolic process	2/44	38/18888	0.00353501	0.0318955	0.022392	3991/4023	2		GO:1901989	positive regulation of cell cycle phase transition	25/351	117/18888	9.95055e-20	2.7097e-18	2.17022e-18	9787/994/81610/990/79915/6241/55835/991/995/9700/8317/898/2146/51514/11065/113130/9134/983/6240/27085/993/26271/163786/891/6491	25
GO:0055094	response to lipoprotein particle	2/44	38/18888	0.00353501	0.0318955	0.022392	4023/948	2		GO:0034502	protein localization to chromosome	25/351	124/18888	4.4733e-19	1.20348e-17	9.63873e-18	675/7272/1736/253714/1058/22948/5347/57082/2146/11073/7443/54908/9735/983/157570/55166/84515/83903/27085/55055/4436/9656/9212/83695/701	25
GO:0030301	cholesterol transport	3/44	132/18888	0.00358447	0.0318955	0.022392	948/3952/9370	3		GO:0000077	DNA damage checkpoint signaling	25/351	125/18888	5.49848e-19	1.46168e-17	1.17067e-17	54962/675/83990/1111/11200/146956/1017/5347/51512/29980/641/51514/11073/2177/144455/5888/983/63967/79968/580/4436/90381/9656/1869/83695	25
GO:0015833	peptide transport	4/44	271/18888	0.00358494	0.0318955	0.022392	130399/5950/3952/4826	4		GO:0000910	cytokinesis	29/351	188/18888	1.44551e-18	3.79743e-17	3.04138e-17	675/29127/994/1058/990/3619/5347/24137/9700/79733/3925/54443/6790/1894/144455/9493/51203/26586/55143/9585/55165/10112/128239/9928/9055/332/11113/9212/55964	29
GO:1904950	negative regulation of establishment of protein localization	3/44	133/18888	0.00366127	0.0323368	0.0227018	130399/948/9370	3		GO:0045132	meiotic chromosome segregation	22/351	93/18888	1.57745e-18	4.09586e-17	3.28039e-17	7272/83990/10403/5347/11130/55706/259266/9700/898/10051/57082/9319/6790/2177/9232/9133/23397/9134/83540/84057/26271/151648	22
GO:0050892	intestinal absorption	2/44	39/18888	0.00372059	0.0326226	0.0229025	948/3952	2		GO:0007127	meiosis I	25/351	131/18888	1.82125e-18	4.67453e-17	3.74385e-17	8438/675/994/7153/83990/146956/10403/5347/11130/55706/9700/898/1164/25788/57082/9319/6790/2177/10635/9232/5888/9133/9134/84057/26271	25
GO:0007586	digestion	3/44	136/18888	0.0038977	0.0339296	0.0238201	5950/948/3952	3		GO:0071897	DNA biosynthetic process	29/351	192/18888	2.61737e-18	6.64159e-17	5.31928e-17	4751/1736/7084/10721/1111/22948/5985/3181/1063/5426/5427/5983/7083/9768/5984/890/5422/51514/79075/7298/80119/78995/6240/5982/7398/1032/286826/5111/9212	29
GO:0071402	cellular response to lipoprotein particle stimulus	2/44	41/18888	0.00410513	0.03548	0.0249085	4023/948	2		GO:0006268	DNA unwinding involved in DNA replication	13/351	21/18888	4.49765e-18	1.12845e-16	9.03785e-17	8318/64785/4175/4176/641/5888/51659/4171/84296/4173/4172/9837/4174	13
GO:0009409	response to cold	2/44	42/18888	0.00430403	0.0366752	0.0257476	5346/1149	2		GO:1901992	positive regulation of mitotic cell cycle phase transition	22/351	99/18888	6.73861e-18	1.67192e-16	1.33905e-16	9787/994/990/6241/55835/991/995/9700/8317/898/51514/11065/113130/9134/983/6240/27085/993/26271/163786/891/6491	22
GO:0032735	positive regulation of interleukin-12 production	2/44	42/18888	0.00430403	0.0366752	0.0257476	948/3952	2		GO:0034508	centromere complex assembly	14/351	28/18888	1.43511e-17	3.52154e-16	2.82042e-16	1062/9787/1058/1063/64946/64105/55355/55839/387103/79172/9735/2491/54069/11339	14
GO:0014074	response to purine-containing compound	3/44	143/18888	0.00448506	0.0379505	0.0266429	5105/2819/9370	3		GO:0045931	positive regulation of mitotic cell cycle	24/351	130/18888	2.00041e-17	4.85535e-16	3.88868e-16	675/9787/994/990/6241/55835/991/995/9700/8317/898/51514/11065/113130/6790/9134/983/6240/27085/993/26271/163786/891/6491	24
GO:0046887	positive regulation of hormone secretion	3/44	144/18888	0.0045731	0.0384268	0.0269773	5950/3952/4826	3		GO:0010639	negative regulation of organelle organization	37/351	365/18888	4.16974e-17	1.00119e-15	8.01855e-16	7272/7153/1111/1063/3619/22974/10403/147841/81624/5347/348654/11130/899/991/146691/4085/9700/57082/9319/3925/54908/9735/80119/26586/55143/83540/699/57405/83903/27085/55055/286151/26271/332/9212/891/701	37
GO:0015918	sterol transport	3/44	145/18888	0.00466219	0.0389052	0.0273131	948/3952/9370	3		GO:0000281	mitotic cytokinesis	20/351	88/18888	1.37149e-16	3.22373e-15	2.5819e-15	29127/1058/3619/5347/24137/9700/3925/54443/1894/9493/51203/26586/55143/9585/55165/10112/128239/332/11113/9212	20
GO:0090278	negative regulation of peptide hormone secretion	2/44	45/18888	0.00492704	0.0408337	0.028667	130399/3952	2		GO:0044774	mitotic DNA integrity checkpoint signaling	20/351	88/18888	1.37149e-16	3.22373e-15	2.5819e-15	54962/1111/990/11200/146956/1017/5347/51512/29980/641/51514/11073/2177/144455/983/63967/4436/90381/9656/4998	20
GO:0033157	regulation of intracellular protein transport	3/44	149/18888	0.00502906	0.0411159	0.0288652	948/3952/9370	3		GO:0042770	signal transduction in response to DNA damage	27/351	188/18888	1.48424e-16	3.4524e-15	2.76504e-15	54962/675/83990/1111/79915/11200/146956/1017/5347/51512/29980/641/51514/11073/2305/2177/144455/5888/983/63967/79968/580/4436/90381/9656/1869/83695	27
GO:2000377	regulation of reactive oxygen species metabolic process	3/44	149/18888	0.00502906	0.0411159	0.0288652	3240/948/3952	3		GO:0000076	DNA replication checkpoint signaling	12/351	20/18888	1.55096e-16	3.5704e-15	2.85955e-15	54962/990/8318/1763/29980/11073/81620/8914/63967/90381/9656/4998	12
GO:0002792	negative regulation of peptide secretion	2/44	46/18888	0.0051434	0.0417686	0.0293234	130399/3952	2		GO:0000727	double-strand break repair via break-induced replication	10/351	12/18888	2.76198e-16	6.29338e-15	5.0404e-15	8318/4175/4176/8317/51659/4171/84296/4173/4172/4174	10
GO:0023061	signal release	5/44	487/18888	0.00529592	0.0425932	0.0299023	130399/5950/3952/9370/4826	5		GO:0051988	regulation of attachment of spindle microtubules to kinetochore	12/351	21/18888	3.55894e-16	8.02738e-15	6.42917e-15	4751/29127/3619/1894/9735/55143/55055/10615/332/9212/891/90417	12
GO:1903531	negative regulation of secretion by cell	3/44	152/18888	0.00531535	0.0425932	0.0299023	130399/3952/9370	3		GO:1902969	mitotic DNA replication	11/351	17/18888	8.75111e-16	1.95412e-14	1.56507e-14	675/8318/64785/7083/4175/5422/5888/4171/4173/4172/9837	11
GO:0031667	response to nutrient levels	5/44	490/18888	0.00543373	0.0432554	0.0303672	130399/5105/4023/3952/9370	5		GO:0090307	mitotic spindle assembly	18/351	73/18888	9.83406e-16	2.1742e-14	1.74133e-14	4751/29127/126731/3619/22974/11200/5347/991/24137/4605/29128/3832/9493/55143/3833/9055/332/9212	18
GO:0031670	cellular response to nutrient	2/44	48/18888	0.00558907	0.0439141	0.0308296	4023/3952	2		GO:0007098	centrosome cycle	23/351	139/18888	1.16974e-15	2.56082e-14	2.05097e-14	4751/675/1111/22995/93323/284403/10403/1017/5347/348654/899/7516/55835/10733/9768/3832/7514/6790/983/151648/163786/9793/6491	23
GO:0120163	negative regulation of cold-induced thermogenesis	2/44	48/18888	0.00558907	0.0439141	0.0308296	9370/1149	2		GO:1905820	positive regulation of chromosome separation	13/351	29/18888	1.31174e-15	2.84381e-14	2.27762e-14	64151/9787/3619/54892/9918/991/9700/10051/11065/23397/55143/332/9212	13
GO:0071375	cellular response to peptide hormone stimulus	4/44	311/18888	0.00583047	0.0455153	0.0319538	5105/286753/3952/9370	4		GO:0051315	attachment of mitotic spindle microtubules to kinetochore	12/351	24/18888	3.11415e-15	6.68644e-14	5.3552e-14	1062/220134/3619/10403/11004/81620/55143/221150/83540/348235/332/9212	12
GO:0098754	detoxification	3/44	158/18888	0.00591699	0.0458946	0.03222	3240/948/2878	3		GO:0061640	cytoskeleton-dependent cytokinesis	21/351	117/18888	3.828e-15	8.14087e-14	6.52007e-14	29127/1058/3619/5347/24137/9700/3925/54443/1894/9493/51203/26586/55143/9585/55165/10112/128239/332/11113/9212/55964	21
GO:0048284	organelle fusion	3/44	159/18888	0.00602106	0.0464044	0.0325779	286753/1149/63924	3		GO:0045005	DNA-templated DNA replication maintenance of fidelity	16/351	57/18888	4.17586e-15	8.79689e-14	7.04547e-14	54962/675/253714/10721/146956/1763/5426/348654/10293/29980/641/5888/8914/84515/580/5111	16
GO:0032387	negative regulation of intracellular transport	2/44	51/18888	0.00628957	0.0481669	0.0338153	948/9370	2		GO:0000082	G1/S transition of mitotic cell cycle	28/351	234/18888	4.90363e-15	1.02335e-13	8.19603e-14	1104/990/11200/1017/5426/10926/51512/6241/55835/8317/898/890/2146/144455/1033/9134/6502/983/5933/6240/27085/993/128239/9928/1032/163786/1869/6491	28
GO:0006111	regulation of gluconeogenesis	2/44	52/18888	0.00653152	0.0492863	0.0346012	3952/9370	2		GO:0032465	regulation of cytokinesis	19/351	93/18888	6.58548e-15	1.36161e-13	1.09052e-13	675/29127/994/990/3619/5347/79733/6790/1894/144455/9493/55143/9585/10112/9928/9055/332/11113/9212	19
GO:0007584	response to nutrient	3/44	164/18888	0.00655793	0.0492863	0.0346012	4023/3952/9370	3		GO:0031023	microtubule organizing center organization	23/351	152/18888	8.74152e-15	1.79081e-13	1.43427e-13	4751/675/1111/22995/93323/284403/10403/1017/5347/348654/899/7516/55835/10733/9768/3832/7514/6790/983/151648/163786/9793/6491	23
GO:0050731	positive regulation of peptidyl-tyrosine phosphorylation	3/44	164/18888	0.00655793	0.0492863	0.0346012	948/3952/9370	3		GO:0051054	positive regulation of DNA metabolic process	31/351	301/18888	1.08111e-14	2.19466e-13	1.75771e-13	4751/1736/22948/5985/3181/79915/1017/1763/10926/5983/8317/5984/890/79733/2187/79075/7468/2305/10635/144455/81620/5888/8914/983/993/4436/5982/7398/5111/5558/9212	31
										GO:0006271	DNA strand elongation involved in DNA replication	10/351	15/18888	1.19582e-14	2.36307e-13	1.89259e-13	1763/5426/5983/4176/5984/5422/5111/4173/4172/9837	10
LumA-ceRM6										GO:0030174	regulation of DNA-templated DNA replication initiation	10/351	15/18888	1.19582e-14	2.36307e-13	1.89259e-13	1017/4175/4176/81620/4171/90381/4173/4172/4174/51053	10
ID	Description	GeneRatio	BgRatio	pvalue	p.adjust	qvalue	geneID	Count		GO:0044771	meiotic cell cycle phase transition	10/351	15/18888	1.19582e-14	2.36307e-13	1.89259e-13	9088/7272/994/10403/11130/991/995/57082/9133/993	10
GO:0019882	antigen processing and presentation	26/469	117/18888	8.47137e-18	3.40549e-14	2.70727e-14	909/3134/64127/3106/51752/6366/3135/6891/115827/55080/1512/51762/1514/10392/5696/3105/3133/567/3383/3107/6890/5641/5873/4277/54209/6892	26		GO:0044843	cell cycle G1/S phase transition	29/351	262/18888	1.23748e-14	2.42394e-13	1.94134e-13	1104/81610/990/11200/1017/5426/10926/51512/6241/55835/8317/898/890/2146/144455/1033/9134/6502/983/5933/6240/27085/993/128239/9928/1032/163786/1869/6491	29
GO:0019885	antigen processing and presentation of endogenous peptide antigen via MHC class I	12/469	23/18888	5.04445e-14	1.01394e-10	8.06051e-11	3134/3106/51752/3135/6891/3105/3133/567/3107/6890/4277/6892	12		GO:0044773	mitotic DNA damage checkpoint signaling	18/351	84/18888	1.41273e-14	2.74315e-13	2.19701e-13	54962/1111/11200/146956/1017/5347/51512/29980/641/51514/11073/2177/144455/983/63967/4436/90381/9656	18
GO:0002483	antigen processing and presentation of endogenous peptide antigen	12/469	25/18888	1.85451e-13	2.3852e-10	1.89617e-10	3134/3106/51752/3135/6891/3105/3133/567/3107/6890/4277/6892	12		GO:0051984	positive regulation of chromosome segregation	12/351	27/18888	1.9041e-14	3.66539e-13	2.93563e-13	64151/990/3619/54892/9918/10051/23397/983/55143/332/9212/891	12
GO:0019883	antigen processing and presentation of endogenous antigen	13/469	32/18888	2.61483e-13	2.3852e-10	1.89617e-10	909/3134/3106/51752/3135/6891/3105/3133/567/3107/6890/4277/6892	13		GO:0051383	kinetochore organization	11/351	21/18888	2.33347e-14	4.45354e-13	3.56686e-13	1062/9787/1058/1063/10403/64946/64105/10051/387103/9735/83540	11
GO:0050867	positive regulation of cell activation	38/469	380/18888	2.96666e-13	2.3852e-10	1.89617e-10	10333/2534/3717/64127/1326/120892/3566/6708/6366/23149/3135/3553/5777/4067/2048/100/64109/11148/8013/90865/1540/3105/115650/970/9308/3133/7124/683/7293/567/4615/283234/11027/26762/864/30011/54209/6403	38		GO:1901976	regulation of cell cycle checkpoint	14/351	44/18888	3.14331e-14	5.94832e-13	4.76404e-13	675/3619/10403/348654/11130/4085/57082/5888/55143/79968/580/332/9212/891	14
GO:0002697	regulation of immune effector process	38/469	385/18888	4.46355e-13	2.99058e-10	2.37743e-10	909/3134/64127/3106/1776/3566/3823/3135/3553/5777/4067/2048/6891/922/144811/10392/8013/933/90865/246778/3105/3822/3133/7124/339390/8482/7293/567/3383/4615/3107/1380/3605/11213/3663/4277/54/54209	38		GO:0036297	interstrand cross-link repair	13/351	41/18888	2.78551e-13	5.22694e-12	4.18628e-12	2189/2175/55247/55215/2187/2177/10635/5888/78995/2176/84515/64858/55732	13
GO:0001819	positive regulation of cytokine production	43/469	500/18888	1.36987e-12	7.59821e-10	6.04037e-10	326/10333/3134/3428/3717/64127/340061/22900/7097/120892/3566/400709/3135/5795/3553/113277/2048/64109/144811/10392/11148/8013/90865/246778/7096/3105/9308/3133/7124/8482/3162/567/4615/1437/283234/100431172/11027/3605/11213/5008/3663/4321/54209	43		GO:0051231	spindle elongation	9/351	14/18888	4.40341e-13	8.19401e-12	6.56262e-12	29127/3619/24137/3832/9493/55143/9055/332/9212	9
GO:0002696	positive regulation of leukocyte activation	36/469	362/18888	1.51208e-12	7.59821e-10	6.04037e-10	10333/2534/3717/64127/1326/120892/3566/6708/6366/23149/3135/3553/5777/4067/2048/100/64109/11148/8013/90865/1540/3105/115650/970/9308/3133/7124/683/7293/567/4615/283234/26762/864/30011/54209	36		GO:0034501	protein localization to kinetochore	9/351	15/18888	1.08291e-12	1.98209e-11	1.58746e-11	7272/57082/54908/9735/983/55166/27085/55055/9212	9
GO:0002274	myeloid leukocyte activation	29/469	241/18888	2.21039e-12	9.62565e-10	7.65213e-10	6283/10333/3717/81501/7097/1776/120892/9111/3566/3579/23208/5777/113277/4067/133396/64109/2205/5320/8013/90865/116071/7096/7124/4615/1437/11027/26762/54209/55509	29		GO:1903083	protein localization to condensed chromosome	9/351	15/18888	1.08291e-12	1.98209e-11	1.58746e-11	7272/57082/54908/9735/983/55166/27085/55055/9212	9
GO:0002474	antigen processing and presentation of peptide antigen via MHC class I	13/469	37/18888	2.39444e-12	9.62565e-10	7.65213e-10	3134/3106/51752/3135/6891/55080/3105/3133/567/3107/6890/4277/6892	13		GO:0051256	mitotic spindle midzone assembly	8/351	11/18888	2.06535e-12	3.74954e-11	3.00303e-11	29127/3619/24137/9493/55143/9055/332/9212	8
GO:0070661	leukocyte proliferation	35/469	352/18888	3.13972e-12	1.14742e-09	9.12171e-10	2534/2322/3717/6708/5699/10457/3135/3553/5777/4067/2048/6480/100/11148/8995/5320/933/90865/246778/3105/115650/3988/970/3133/3568/339390/683/7293/4615/1380/1437/283234/9047/3087/54209	35		GO:0090231	regulation of spindle checkpoint	10/351	22/18888	2.29339e-12	4.12996e-11	3.3077e-11	3619/10403/348654/11130/4085/57082/55143/332/9212/891	10
GO:0002768	immune response-regulating cell surface receptor signaling pathway	35/469	360/18888	5.97777e-12	2.00255e-09	1.59197e-09	10333/2534/64127/7097/9111/7006/29760/5583/9214/3656/3823/23149/3135/5795/5777/2856/4067/696/100/2205/11148/8013/933/1540/7096/3105/3822/3988/4792/4615/79908/1380/11027/4277/54209	35		GO:0032886	regulation of microtubule-based process	26/351	258/18888	2.70414e-12	4.83068e-11	3.86892e-11	29899/126731/220134/22974/93323/284403/81624/5347/348654/899/84722/55835/10460/10733/79866/3925/7514/6790/26586/221150/81930/348235/10615/163786/9793/6491	26
GO:0002429	immune response-activating cell surface receptor signaling pathway	33/469	332/18888	1.34971e-11	4.17373e-09	3.318e-09	10333/2534/64127/7097/9111/7006/29760/5583/9214/3656/3823/23149/5795/5777/2856/4067/696/100/11148/8013/933/1540/7096/3105/3822/3988/4792/4615/79908/1380/11027/4277/54209	33		GO:0031297	replication fork processing	13/351	49/18888	3.63081e-12	6.4346e-11	5.15351e-11	54962/675/253714/10721/146956/1763/348654/10293/29980/641/5888/580/5111	13
GO:0048002	antigen processing and presentation of peptide antigen	16/469	72/18888	1.85983e-11	5.34037e-09	4.24545e-09	3134/3106/51752/3135/6891/55080/1514/3105/3133/567/3107/6890/5641/4277/54209/6892	16		GO:0071459	protein localization to chromosome, centromeric region	12/351	40/18888	4.92535e-12	8.66008e-11	6.93591e-11	7272/1058/57082/54908/9735/983/55166/83903/27085/55055/9212/701	12
GO:0002699	positive regulation of immune effector process	28/469	257/18888	5.83581e-11	1.564e-08	1.24333e-08	909/3134/64127/3106/3566/3823/3135/3553/5777/2048/6891/144811/10392/8013/90865/3105/3822/3133/7124/8482/7293/567/4615/3107/3605/3663/4277/54209	28		GO:0051302	regulation of cell division	22/351	186/18888	5.64377e-12	9.84574e-11	7.8855e-11	675/29127/994/990/3619/5347/259266/641/79733/6790/1894/144455/9493/55143/9585/10112/146909/9928/9055/332/11113/9212	22
GO:0001909	leukocyte mediated cytotoxicity	21/469	144/18888	6.7476e-11	1.69533e-08	1.34774e-08	909/3134/3106/1776/3823/3135/5777/6891/1512/3105/3822/2215/3133/567/3383/4615/3107/127544/100431172/5873/4277	21		GO:0000022	mitotic spindle elongation	8/351	12/18888	6.09605e-12	1.05523e-10	8.4514e-11	29127/3619/24137/9493/55143/9055/332/9212	8
GO:0002757	immune response-activating signaling pathway	40/469	500/18888	7.97447e-11	1.88573e-08	1.4991e-08	54941/10333/2534/64127/340061/22900/7097/9111/7006/29760/5583/9214/3656/3823/23149/5795/5777/2856/4067/696/100/144811/10392/11148/8013/933/1540/7096/3105/3822/3988/7124/4792/4615/79908/1380/11027/11213/4277/54209	40		GO:0000731	DNA synthesis involved in DNA repair	12/351	41/18888	6.84816e-12	1.1763e-10	9.42108e-11	10721/5426/5427/5983/9768/5422/51514/78995/6240/7398/1032/5111	12
GO:0002428	antigen processing and presentation of peptide antigen via MHC class Ib	9/469	18/18888	1.32551e-10	2.9603e-08	2.35335e-08	3134/3106/3135/6891/3105/3133/567/3107/4277	9		GO:0000079	regulation of cyclin-dependent protein serine/threonine kinase activity	15/351	78/18888	1.22329e-11	2.08519e-10	1.67004e-10	9088/990/5347/899/84722/995/641/898/890/1033/9133/9134/993/1032/891	15
GO:0070663	regulation of leukocyte proliferation	28/469	267/18888	1.43366e-10	3.03331e-08	2.4114e-08	3717/6708/10457/3135/3553/5777/4067/2048/6480/100/11148/8995/5320/933/90865/246778/3105/115650/970/3133/3568/339390/683/7293/4615/1437/283234/3087	28		GO:0090232	positive regulation of spindle checkpoint	8/351	13/18888	1.55939e-11	2.63798e-10	2.11277e-10	3619/10403/348654/4085/57082/55143/332/9212	8
GO:0050727	regulation of inflammatory response	36/469	425/18888	1.52131e-10	3.05784e-08	2.43089e-08	6283/837/2534/3717/64127/340061/7097/1776/120892/9111/50616/23208/7114/3553/5777/4067/100/144811/5320/6401/90865/1540/3133/7124/4792/683/348/8482/2113/4615/3605/5008/4318/6369/54/54209	36		GO:0070507	regulation of microtubule cytoskeleton organization	20/351	160/18888	1.90715e-11	3.20201e-10	2.56451e-10	29899/126731/220134/22974/93323/81624/5347/84722/55835/10460/79866/3925/26586/221150/81930/348235/10615/163786/9793/6491	20
GO:0002460	adaptive immune response based on somatic recombination of immune receptors built from immunoglobulin superfamily domains	34/469	385/18888	1.66017e-10	3.17804e-08	2.52645e-08	326/909/3134/3717/64127/3543/3106/3566/9214/3135/3553/5777/2048/6891/100/1512/2205/715/90865/246778/3105/970/2215/3133/7124/339390/567/3383/4615/3107/1380/5873/4277/54209	34		GO:1904029	regulation of cyclin-dependent protein kinase activity	15/351	81/18888	2.16867e-11	3.61391e-10	2.8944e-10	9088/990/5347/899/84722/995/641/898/890/1033/9133/9134/993/1032/891	15
GO:0002475	antigen processing and presentation via MHC class Ib	10/469	25/18888	1.89615e-10	3.46478e-08	2.7544e-08	909/3134/3106/3135/6891/3105/3133/567/3107/4277	10		GO:0010972	negative regulation of G2/M transition of mitotic cell cycle	14/351	68/18888	2.25238e-11	3.7086e-10	2.97024e-10	9088/1111/990/5347/29980/641/51514/11073/983/63967/580/90381/4998/9212	14
GO:0002449	lymphocyte mediated immunity	33/469	372/18888	2.7677e-10	4.83747e-08	3.84565e-08	326/909/3134/64127/3543/3106/3566/9214/3823/3135/3553/5777/6891/1512/2205/715/3105/3822/970/2215/3133/7124/339390/567/3383/4615/3107/127544/1380/100431172/5873/4277/54209	33		GO:0065004	protein-DNA complex assembly	24/351	240/18888	2.25871e-11	3.7086e-10	2.97024e-10	3148/1062/9787/55723/1058/1063/8318/64946/64105/55355/8208/55839/387103/79172/10036/81620/5888/9735/23234/2491/54069/4171/11339/51053	24
GO:0032943	mononuclear cell proliferation	30/469	315/18888	3.34614e-10	5.42088e-08	4.30945e-08	2534/2322/3717/6708/5699/10457/3135/3553/5777/4067/2048/6480/100/11148/8995/5320/933/246778/3105/115650/3988/970/3133/339390/683/7293/4615/1380/283234/9047	30		GO:1902750	negative regulation of cell cycle G2/M phase transition	14/351	70/18888	3.41558e-11	5.56715e-10	4.45876e-10	9088/1111/990/5347/29980/641/51514/11073/983/63967/580/90381/4998/9212	14
GO:1903039	positive regulation of leukocyte cell-cell adhesion	28/469	277/18888	3.37119e-10	5.42088e-08	4.30945e-08	2534/3717/64127/1326/3566/6708/6366/23149/3135/3553/5777/4067/100/11148/8013/6401/1540/3105/115650/970/9308/3133/7124/2113/567/283234/864/6403	28		GO:0051255	spindle midzone assembly	8/351	14/18888	3.57988e-11	5.79265e-10	4.63937e-10	29127/3619/24137/9493/55143/9055/332/9212	8
GO:0002819	regulation of adaptive immune response	24/469	207/18888	3.91093e-10	6.0469e-08	4.80712e-08	909/3134/3717/64127/3106/3566/3135/3553/5777/2048/6891/100/113/90865/246778/3105/3133/7124/339390/567/3107/1380/4277/54209	24		GO:0032467	positive regulation of cytokinesis	12/351	47/18888	4.09859e-11	6.58429e-10	5.27339e-10	29127/994/990/3619/1894/9493/55143/9585/9928/332/11113/9212	12
GO:0001906	cell killing	25/469	226/18888	4.58645e-10	6.58827e-08	5.23749e-08	6283/909/3134/3106/1776/3823/3135/5777/6891/922/1512/5320/3105/3822/2215/3133/8542/567/3383/4615/3107/127544/100431172/5873/4277	25		GO:0022616	DNA strand elongation	11/351	37/18888	4.33512e-11	6.91451e-10	5.53787e-10	1763/5426/5983/4176/5984/5422/64858/5111/4173/4172/9837	11
GO:0002456	T cell mediated immunity	19/469	129/18888	4.62302e-10	6.58827e-08	5.23749e-08	326/909/3134/64127/3106/3135/3553/6891/1512/3105/970/3133/339390/567/3383/3107/1380/5873/4277	19		GO:0007062	sister chromatid cohesion	13/351	59/18888	4.73356e-11	7.49648e-10	6.00397e-10	2237/5347/991/9700/113130/79075/157570/699/83903/151246/3835/151648/701	13
GO:0002822	regulation of adaptive immune response based on somatic recombination of immune receptors built from immunoglobulin superfamily domains	23/469	192/18888	4.75273e-10	6.58827e-08	5.23749e-08	909/3134/3717/64127/3106/3566/3135/3553/5777/2048/6891/100/90865/246778/3105/3133/7124/339390/567/3107/1380/4277/54209	23		GO:0090266	regulation of mitotic cell cycle spindle assembly checkpoint	9/351	21/18888	5.76294e-11	8.99906e-10	7.20739e-10	3619/10403/348654/4085/57082/55143/332/9212/891	9
GO:0002443	leukocyte mediated immunity	37/469	469/18888	6.22096e-10	8.33608e-08	6.62696e-08	326/909/3134/64127/3543/3106/1776/3566/1621/9214/3823/3135/3553/5777/4067/6891/1512/2205/715/8013/3105/3822/970/2215/3133/7124/339390/567/3383/4615/3107/127544/1380/100431172/5873/4277/54209	37		GO:1903504	regulation of mitotic spindle checkpoint	9/351	21/18888	5.76294e-11	8.99906e-10	7.20739e-10	3619/10403/348654/4085/57082/55143/332/9212/891	9
GO:0046651	lymphocyte proliferation	29/469	308/18888	8.67417e-10	1.12484e-07	8.9422e-08	2534/2322/3717/6708/5699/10457/3135/3553/5777/4067/2048/100/11148/8995/5320/933/246778/3105/115650/3988/970/3133/339390/683/7293/4615/1380/283234/9047	29		GO:0007143	female meiotic nuclear division	11/351	39/18888	8.22043e-11	1.26174e-09	1.01053e-09	7272/994/7153/10403/5347/9319/6790/9133/23397/84930/26271	11
GO:0002700	regulation of production of molecular mediator of immune response	22/469	187/18888	1.60801e-09	2.02006e-07	1.60589e-07	3134/64127/3566/3135/3553/2048/144811/10392/8013/933/90865/3105/3133/7124/8482/7293/567/4615/3605/11213/3663/54	22		GO:0031055	chromatin remodeling at centromere	7/351	10/18888	8.24961e-11	1.26174e-09	1.01053e-09	1058/55355/55839/387103/2491/54069/11339	7
GO:1903037	regulation of leukocyte cell-cell adhesion	32/469	382/18888	2.16684e-09	2.6396e-07	2.09841e-07	2534/3717/64127/1326/3566/6708/6366/10457/23149/3135/3553/5777/4067/100/11148/5320/8013/6401/1540/3105/115650/6370/970/9308/3133/7124/339390/2113/567/283234/864/6403	32		GO:0034080	CENP-A containing chromatin assembly	7/351	10/18888	8.24961e-11	1.26174e-09	1.01053e-09	1058/55355/55839/387103/2491/54069/11339	7
GO:0002476	antigen processing and presentation of endogenous peptide antigen via MHC class Ib	8/469	17/18888	2.72e-09	3.12411e-07	2.48358e-07	3134/3106/3135/6891/3105/3133/3107/4277	8		GO:1902751	positive regulation of cell cycle G2/M phase transition	10/351	31/18888	1.35552e-10	2.0591e-09	1.64915e-09	994/79915/995/8317/51514/983/6240/993/26271/891	10
GO:0002484	antigen processing and presentation of endogenous peptide antigen via MHC class I via ER pathway	8/469	17/18888	2.72e-09	3.12411e-07	2.48358e-07	3134/3106/3135/6891/3105/3133/3107/4277	8		GO:0044818	mitotic G2/M transition checkpoint	12/351	53/18888	1.89333e-10	2.85663e-09	2.28789e-09	1111/990/5347/29980/641/51514/11073/983/63967/580/90381/4998	12
GO:0022409	positive regulation of cell-cell adhesion	29/469	325/18888	3.00208e-09	3.35232e-07	2.665e-07	2534/3717/64127/8728/1326/3566/6708/6366/23149/3135/3553/5777/4067/100/11148/8013/6401/1540/3105/115650/970/9308/3133/7124/2113/567/283234/864/6403	29		GO:0045740	positive regulation of DNA replication	11/351	43/18888	2.63978e-10	3.95612e-09	3.16848e-09	79915/1017/1763/10926/8317/79733/144455/81620/983/993/5111	11
GO:0043410	positive regulation of MAPK cascade	36/469	475/18888	3.13281e-09	3.40375e-07	2.70589e-07	6283/51384/10333/7476/10371/6356/2322/3717/64127/120892/6366/154/10457/414062/5795/3553/113277/2688/799/6368/10392/5320/9290/4914/6370/7124/348/8482/3383/4615/2771/8685/8837/5008/6369/54209	36		GO:0051382	kinetochore assembly	8/351	17/18888	2.76e-10	4.10873e-09	3.2907e-09	1062/9787/1058/1063/64946/64105/387103/9735	8
GO:0045088	regulation of innate immune response	34/469	440/18888	5.35247e-09	5.59625e-07	4.44886e-07	54941/10333/3134/3428/2534/64127/340061/22900/7097/3106/9111/51752/3656/3823/3135/5777/4067/6737/144811/10392/1540/84166/7096/3105/3822/3133/7124/4792/348/4615/11027/11213/4321/54209	34		GO:0035825	homologous recombination	13/351	68/18888	3.15581e-10	4.66683e-09	3.73769e-09	8438/7153/83990/146956/25788/29128/9319/11073/2177/10635/5888/580/84057	13
GO:0045785	positive regulation of cell adhesion	36/469	485/18888	5.4292e-09	5.59625e-07	4.44886e-07	2534/3717/64127/25890/8728/1326/25975/3566/6708/6366/23149/3135/5795/3553/5777/4067/100/10109/11148/8995/8013/6401/1540/3105/115650/6370/970/9308/3133/7124/59339/2113/567/283234/864/6403	36		GO:0051445	regulation of meiotic cell cycle	13/351	69/18888	3.8239e-10	5.61761e-09	4.49917e-09	9088/7272/994/11130/259266/991/995/57082/9319/10635/993/286151/26271	13
GO:0007159	leukocyte cell-cell adhesion	33/469	419/18888	5.65998e-09	5.68828e-07	4.52203e-07	2534/3717/64127/1326/3566/6708/6366/10457/23149/3135/3553/5777/4067/100/11148/5320/8013/6401/1540/3105/115650/6370/970/9308/3133/7124/339390/2113/567/3383/283234/864/6403	33		GO:1901970	positive regulation of mitotic sister chromatid separation	8/351	18/18888	4.88789e-10	7.13377e-09	5.71347e-09	9787/3619/991/9700/11065/55143/332/9212	8
GO:0002702	positive regulation of production of molecular mediator of immune response	18/469	134/18888	6.02453e-09	5.90698e-07	4.69588e-07	3134/64127/3566/3135/3553/2048/144811/10392/8013/90865/3105/3133/8482/7293/567/4615/3605/3663	18		GO:0090267	positive regulation of mitotic cell cycle spindle assembly checkpoint	7/351	12/18888	5.27265e-10	7.59602e-09	6.08369e-09	3619/10403/348654/4085/55143/332/9212	7
GO:1904645	response to amyloid-beta	12/469	54/18888	6.36163e-09	6.08899e-07	4.84058e-07	837/10333/2534/154/2048/799/7124/3383/5641/4321/4318/54209	12		GO:1901993	regulation of meiotic cell cycle phase transition	7/351	12/18888	5.27265e-10	7.59602e-09	6.08369e-09	9088/7272/994/11130/995/57082/993	7
GO:0032944	regulation of mononuclear cell proliferation	24/469	241/18888	8.44702e-09	7.89698e-07	6.27788e-07	3717/6708/10457/3135/3553/5777/4067/2048/6480/100/11148/8995/5320/933/246778/3105/115650/970/3133/339390/683/7293/4615/283234	24		GO:0090224	regulation of spindle organization	11/351	46/18888	5.82494e-10	8.33788e-09	6.67785e-09	29899/126731/22974/5347/84722/55835/10460/79866/10615/163786/6491	11
GO:0051251	positive regulation of lymphocyte activation	28/469	328/18888	1.48917e-08	1.36056e-06	1.08161e-06	2534/3717/64127/1326/3566/6708/6366/23149/3135/3553/5777/4067/2048/100/11148/1540/3105/115650/970/9308/3133/683/7293/567/4615/283234/864/30011	28		GO:0009314	response to radiation	30/351	431/18888	6.03717e-10	8.58663e-09	6.87707e-09	8438/54962/55872/675/2189/11200/2237/7516/63979/641/9768/25788/51514/11073/2177/1894/10635/5888/2956/6240/580/993/4436/7398/90381/1032/5111/1408/9212/83695	30
GO:1903131	mononuclear cell differentiation	35/469	484/18888	1.72953e-08	1.54505e-06	1.22827e-06	326/3428/2322/10803/81501/3106/29760/3566/9935/3135/5795/3553/5777/4067/133396/100/1514/116071/1540/4914/246778/3988/9308/9452/339390/567/4066/1380/1437/222487/3087/864/54209/6932/55509	35		GO:0010212	response to ionizing radiation	17/351	138/18888	7.98814e-10	1.12896e-08	9.04188e-09	8438/675/11200/7516/63979/641/25788/11073/2177/1894/10635/5888/6240/580/4436/90381/83695	17
GO:0050900	leukocyte migration	31/469	396/18888	1.9112e-08	1.66279e-06	1.32187e-06	6283/326/2534/6356/64127/3579/1621/6366/414062/3553/1800/4067/100/80024/6368/9023/8995/6401/90865/6370/7124/683/3162/3383/4615/5641/3605/7852/6369/54209/6403	31		GO:1901978	positive regulation of cell cycle checkpoint	8/351	19/18888	8.30661e-10	1.16658e-08	9.34321e-09	3619/10403/348654/4085/57082/55143/332/9212	8
GO:0031348	negative regulation of defense response	26/469	291/18888	1.94406e-08	1.66279e-06	1.32187e-06	3134/3428/2534/64127/3106/9111/50616/23208/7114/3135/5777/4067/100/6737/90865/1540/84166/3105/3133/348/3605/11213/4321/4277/54/54209	26		GO:0051298	centrosome duplication	13/351	75/18888	1.13292e-09	1.58114e-08	1.26634e-08	675/22995/284403/10403/1017/348654/899/55835/10733/7514/163786/9793/6491	13
GO:0001913	T cell mediated cytotoxicity	12/469	60/18888	2.26754e-08	1.89907e-06	1.50971e-06	909/3134/3106/3135/6891/1512/3105/3133/567/3107/5873/4277	12		GO:0010971	positive regulation of G2/M transition of mitotic cell cycle	9/351	28/18888	1.20727e-09	1.67443e-08	1.34106e-08	994/995/8317/51514/983/6240/993/26271/891	9
GO:0050670	regulation of lymphocyte proliferation	23/469	237/18888	2.8132e-08	2.30797e-06	1.83478e-06	3717/6708/10457/3135/3553/5777/4067/2048/100/11148/8995/5320/933/246778/3105/115650/970/3133/339390/683/7293/4615/283234	23		GO:0045143	homologous chromosome segregation	12/351	67/18888	3.37005e-09	4.64526e-08	3.72041e-08	83990/5347/11130/55706/9700/898/57082/9319/2177/9232/9134/84057	12
GO:0001916	positive regulation of T cell mediated cytotoxicity	10/469	40/18888	3.5203e-08	2.83032e-06	2.25003e-06	909/3134/3106/3135/6891/3105/3133/567/3107/4277	10		GO:2000278	regulation of DNA biosynthetic process	15/351	115/18888	3.60517e-09	4.93886e-08	3.95555e-08	4751/1736/1111/22948/5985/3181/5983/5984/890/79075/80119/5982/7398/5111/9212	15
GO:0009615	response to virus	31/469	409/18888	4.01562e-08	3.16526e-06	2.51629e-06	5371/3428/6356/3717/340061/22900/7097/3660/9111/91607/200316/3553/3669/6737/9020/10577/3588/90865/197259/246778/84166/7124/3455/4615/64108/11213/7852/3663/4321/4277/55509	31		GO:0060236	regulation of mitotic spindle organization	10/351	42/18888	3.75002e-09	5.10597e-08	4.0894e-08	29899/126731/22974/5347/84722/55835/10460/79866/163786/6491	10
GO:0031343	positive regulation of cell killing	13/469	76/18888	4.24959e-08	3.28526e-06	2.61169e-06	909/3134/3106/3823/3135/6891/922/3105/3822/3133/567/3107/4277	13		GO:0031109	microtubule polymerization or depolymerization	16/351	135/18888	4.47674e-09	6.05852e-08	4.8523e-08	126731/220134/22974/93323/81624/84722/55835/11004/3925/26586/221150/146909/81930/348235/26271/9793	16
GO:0032102	negative regulation of response to external stimulus	33/469	456/18888	4.4049e-08	3.34107e-06	2.65606e-06	3134/3428/2534/10371/64127/22900/3106/9111/50616/23208/7114/3135/5777/4067/6480/100/6737/90865/1540/84166/3105/3133/7124/348/8482/10019/11027/3605/11213/4321/4277/54/54209	33		GO:2000573	positive regulation of DNA biosynthetic process	12/351	70/18888	5.68712e-09	7.65021e-08	6.12709e-08	4751/1736/22948/5985/5983/5984/890/79075/5982/7398/5111/9212	12
GO:0034612	response to tumor necrosis factor	24/469	263/18888	4.59771e-08	3.42274e-06	2.72098e-06	837/6356/3717/81501/22900/6366/7114/51667/414062/355/6368/1393/8995/6401/1540/115650/6370/970/7124/4792/9705/7293/6369/2643	24		GO:0030261	chromosome condensation	10/351	45/18888	7.73754e-09	1.03461e-07	8.28621e-08	64151/7153/5347/54892/9918/10051/113130/23397/51203/983	10
GO:0002718	regulation of cytokine production involved in immune response	16/469	120/18888	4.69993e-08	3.43522e-06	2.73091e-06	3134/64127/3135/3553/144811/10392/8013/3105/3133/7124/8482/567/4615/11213/3663/54	16		GO:0051053	negative regulation of DNA metabolic process	16/351	142/18888	9.36917e-09	1.24532e-07	9.97383e-08	116028/54962/10721/1111/990/641/2187/81620/80119/8914/2956/4436/26271/51053/79000/55010	16
GO:0002833	positive regulation of response to biotic stimulus	30/469	390/18888	4.8132e-08	3.45519e-06	2.74678e-06	54941/10333/3134/3428/2534/64127/340061/22900/7097/9111/3656/400709/3823/3135/4067/144811/10392/1540/84166/7096/3822/3133/7124/4792/4615/11027/3605/11213/4321/54209	30		GO:2000045	regulation of G1/S transition of mitotic cell cycle	18/351	185/18888	1.15947e-08	1.53201e-07	1.22699e-07	990/11200/1017/51512/6241/55835/898/2146/144455/9134/5933/6240/27085/9928/1032/163786/1869/6491	18
GO:0002237	response to molecule of bacterial origin	29/469	369/18888	5.08958e-08	3.57408e-06	2.84129e-06	4353/10333/3717/64127/11009/22900/7097/3656/1053/5732/3553/4067/2048/6891/6401/7096/7124/4792/567/4615/1437/11027/11213/3663/4318/54/2643/54209/6403	29		GO:1902806	regulation of cell cycle G1/S phase transition	19/351	211/18888	1.61964e-08	2.12745e-07	1.70388e-07	81610/990/11200/1017/51512/6241/55835/898/2146/144455/9134/5933/6240/27085/9928/1032/163786/1869/6491	19
GO:0002486	antigen processing and presentation of endogenous peptide antigen via MHC class I via ER pathway, TAP-independent	7/469	16/18888	5.24553e-08	3.57408e-06	2.84129e-06	3134/3106/3135/3105/3133/3107/4277	7		GO:2001252	positive regulation of chromosome organization	14/351	110/18888	1.66057e-08	2.16846e-07	1.73673e-07	64151/4751/1736/22948/3181/2237/1017/54892/9918/10051/23397/983/699/9212	14
GO:0016045	detection of bacterium	7/469	16/18888	5.24553e-08	3.57408e-06	2.84129e-06	10333/64127/7097/3106/10392/7096/3105	7		GO:0033314	mitotic DNA replication checkpoint signaling	6/351	11/18888	1.68577e-08	2.18857e-07	1.75283e-07	990/29980/11073/63967/90381/4998	6
GO:0032640	tumor necrosis factor production	20/469	189/18888	5.43387e-08	3.58101e-06	2.84681e-06	3717/64127/7097/120892/23208/10457/5795/5777/113277/2048/10392/90865/7096/3133/4615/11027/3605/11213/54/54209	20		GO:0051653	spindle localization	11/351	62/18888	1.70174e-08	2.19652e-07	1.7592e-07	29899/1058/10403/5347/259266/4085/9700/54908/51203/10615/89958	11
GO:0032680	regulation of tumor necrosis factor production	20/469	189/18888	5.43387e-08	3.58101e-06	2.84681e-06	3717/64127/7097/120892/23208/10457/5795/5777/113277/2048/10392/90865/7096/3133/4615/11027/3605/11213/54/54209	20		GO:0007095	mitotic G2 DNA damage checkpoint signaling	9/351	37/18888	1.87623e-08	2.40783e-07	1.92845e-07	1111/5347/29980/641/51514/11073/983/63967/90381	9
GO:0002703	regulation of leukocyte mediated immunity	23/469	246/18888	5.62351e-08	3.64621e-06	2.89864e-06	909/3134/64127/3106/1776/3566/3823/3135/3553/5777/4067/6891/3105/3822/3133/7124/339390/567/3383/3107/1380/4277/54209	23		GO:0000018	regulation of DNA recombination	15/351	132/18888	2.43562e-08	3.10785e-07	2.48909e-07	116028/10721/1111/79915/63979/641/2187/7468/3838/10635/5888/8914/2956/4436/55010	15
GO:0002367	cytokine production involved in immune response	16/469	122/18888	5.95637e-08	3.80073e-06	3.02148e-06	3134/64127/3135/3553/144811/10392/8013/3105/3133/7124/8482/567/4615/11213/3663/54	16		GO:0070192	chromosome organization involved in meiotic cell cycle	11/351	65/18888	2.85134e-08	3.61764e-07	2.89739e-07	83990/55706/9918/898/10051/9319/2177/5888/23397/9134/84057	11
GO:0070098	chemokine-mediated signaling pathway	14/469	93/18888	6.90434e-08	4.33679e-06	3.44763e-06	6356/10803/3579/6366/414062/4067/6368/6370/2532/10019/1232/7852/6369/54209	14		GO:0007076	mitotic chromosome condensation	7/351	19/18888	2.9982e-08	3.76122e-07	3.01238e-07	64151/5347/9918/10051/113130/23397/51203	7
GO:0050777	negative regulation of immune response	20/469	194/18888	8.40085e-08	4.97812e-06	3.95747e-06	3134/3428/2534/64127/3106/9111/3566/3135/5777/4067/6737/90865/84166/3105/3133/339390/1380/11213/4321/54209	20		GO:0051447	negative regulation of meiotic cell cycle	7/351	19/18888	2.9982e-08	3.76122e-07	3.01238e-07	9088/7272/11130/57082/9319/286151/26271	7
GO:0071706	tumor necrosis factor superfamily cytokine production	20/469	194/18888	8.40085e-08	4.97812e-06	3.95747e-06	3717/64127/7097/120892/23208/10457/5795/5777/113277/2048/10392/90865/7096/3133/4615/11027/3605/11213/54/54209	20		GO:0040001	establishment of mitotic spindle localization	9/351	40/18888	3.92623e-08	4.89792e-07	3.92277e-07	29899/1058/10403/5347/4085/9700/54908/51203/89958	9
GO:1903555	regulation of tumor necrosis factor superfamily cytokine production	20/469	194/18888	8.40085e-08	4.97812e-06	3.95747e-06	3717/64127/7097/120892/23208/10457/5795/5777/113277/2048/10392/90865/7096/3133/4615/11027/3605/11213/54/54209	20		GO:0000723	telomere maintenance	16/351	158/18888	4.33262e-08	5.37486e-07	4.30475e-07	4751/675/1736/22948/3181/2237/1763/641/898/9156/5888/80119/9134/64858/5111/9212	16
GO:0002824	positive regulation of adaptive immune response based on somatic recombination of immune receptors built from immunoglobulin superfamily domains	16/469	125/18888	8.42071e-08	4.97812e-06	3.95747e-06	909/3134/3717/64127/3106/3135/3553/6891/100/3105/3133/7124/567/3107/4277/54209	16		GO:1902808	positive regulation of cell cycle G1/S phase transition	11/351	68/18888	4.64679e-08	5.73275e-07	4.59139e-07	81610/990/6241/55835/898/2146/9134/6240/27085/163786/6491	11
GO:0042098	T cell proliferation	21/469	213/18888	8.63587e-08	5.03133e-06	3.99977e-06	2534/3717/6708/5699/10457/3135/3553/5777/11148/8995/5320/246778/3105/115650/3988/970/3133/339390/7293/283234/9047	21		GO:0007144	female meiosis I	6/351	13/18888	6.06716e-08	7.44394e-07	5.96189e-07	994/10403/9319/6790/9133/26271	6
GO:0031341	regulation of cell killing	15/469	110/18888	9.12768e-08	5.2419e-06	4.16716e-06	909/3134/3106/1776/3823/3135/6891/922/3105/3822/3133/567/3383/3107/4277	15		GO:0051293	establishment of spindle localization	10/351	57/18888	8.5932e-08	1.04856e-06	8.39795e-07	29899/1058/10403/5347/4085/9700/54908/51203/10615/89958	10
GO:0002720	positive regulation of cytokine production involved in immune response	13/469	81/18888	9.33051e-08	5.25595e-06	4.17834e-06	3134/64127/3135/3553/144811/10392/8013/3105/3133/8482/567/4615/3663	13		GO:0032200	telomere organization	17/351	189/18888	9.45551e-08	1.14751e-06	9.19045e-07	4751/675/1736/22948/3181/2237/1763/641/898/9156/2146/5888/80119/9134/64858/5111/9212	17
GO:0050870	positive regulation of T cell activation	23/469	253/18888	9.41364e-08	5.25595e-06	4.17834e-06	2534/3717/64127/1326/3566/6708/6366/23149/3135/3553/5777/4067/100/11148/1540/3105/115650/970/9308/3133/567/283234/864	23		GO:2000105	positive regulation of DNA-templated DNA replication	6/351	14/18888	1.04516e-07	1.26154e-06	1.01037e-06	1017/10926/8317/79733/144455/81620	6
GO:0022407	regulation of cell-cell adhesion	34/469	496/18888	1.01328e-07	5.50697e-06	4.37789e-06	2534/3717/64127/8728/1326/3566/6708/6366/10457/23149/3135/3553/5777/4067/100/11148/5320/8013/6401/1540/3105/115650/6370/970/9308/3133/7124/339390/2113/567/10019/283234/864/6403	34		GO:0007131	reciprocal meiotic recombination	10/351	60/18888	1.42794e-07	1.7032e-06	1.3641e-06	8438/7153/83990/146956/25788/9319/2177/10635/5888/84057	10
GO:0070374	positive regulation of ERK1 and ERK2 cascade	21/469	215/18888	1.01372e-07	5.50697e-06	4.37789e-06	6356/64127/6366/10457/414062/799/6368/10392/5320/9290/4914/6370/7124/348/8482/3383/2771/8685/8837/6369/54209	21		GO:0140527	reciprocal homologous recombination	10/351	60/18888	1.42794e-07	1.7032e-06	1.3641e-06	8438/7153/83990/146956/25788/9319/2177/10635/5888/84057	10
GO:0001910	regulation of leukocyte mediated cytotoxicity	14/469	96/18888	1.04079e-07	5.57863e-06	4.43486e-06	909/3134/3106/1776/3823/3135/6891/3105/3822/3133/567/3383/3107/4277	14		GO:0007019	microtubule depolymerization	9/351	46/18888	1.43395e-07	1.7032e-06	1.3641e-06	126731/22974/81624/11004/3925/26586/146909/81930/9793	9
GO:0050863	regulation of T cell activation	29/469	382/18888	1.07238e-07	5.67231e-06	4.50933e-06	2534/3717/64127/1326/3566/6708/6366/10457/23149/3135/3553/5777/4067/100/11148/8995/5320/1540/246778/3105/115650/970/9308/3133/339390/567/283234/864/6932	29		GO:0051347	positive regulation of transferase activity	24/351	376/18888	1.6909e-07	1.99777e-06	1.60002e-06	1062/4751/1736/5985/3181/22974/5347/5983/84722/991/79866/5984/2146/11065/79075/1894/7804/63967/9928/5982/5111/5558/27338/9212	24
GO:0001912	positive regulation of leukocyte mediated cytotoxicity	12/469	69/18888	1.16672e-07	6.07155e-06	4.82672e-06	909/3134/3106/3823/3135/6891/3105/3822/3133/567/3107/4277	12		GO:0051781	positive regulation of cell division	12/351	94/18888	1.71197e-07	2.01202e-06	1.61144e-06	29127/994/990/3619/1894/9493/55143/9585/9928/332/11113/9212	12
GO:0002708	positive regulation of lymphocyte mediated immunity	16/469	128/18888	1.17806e-07	6.07155e-06	4.82672e-06	909/3134/64127/3106/3823/3135/3553/6891/3105/3822/3133/7124/567/3107/4277/54209	16		GO:0007292	female gamete generation	15/351	163/18888	4.03104e-07	4.71273e-06	3.77445e-06	675/7272/994/7153/10403/5347/259266/9319/6790/9133/23397/78995/84930/84515/26271	15
GO:0098581	detection of external biotic stimulus	8/469	26/18888	1.43562e-07	7.18045e-06	5.70826e-06	10333/64127/7097/3106/10392/7096/3105/54209	8		GO:0031573	mitotic intra-S DNA damage checkpoint signaling	6/351	17/18888	4.10861e-07	4.7784e-06	3.82705e-06	54962/11200/146956/2177/4436/9656	6
GO:0045089	positive regulation of innate immune response	28/469	365/18888	1.43746e-07	7.18045e-06	5.70826e-06	54941/10333/3134/3428/2534/64127/340061/22900/7097/9111/3656/3823/3135/4067/144811/10392/1540/84166/7096/3822/3133/7124/4792/4615/11027/11213/4321/54209	28		GO:0006303	double-strand break repair via nonhomologous end joining	10/351	68/18888	4.82704e-07	5.58486e-06	4.47294e-06	3148/10721/5347/5422/10213/11073/7468/64858/79000/83695	10
GO:0070665	positive regulation of leukocyte proliferation	18/469	164/18888	1.44681e-07	7.18045e-06	5.70826e-06	3717/6708/3553/4067/2048/6480/100/11148/3105/115650/970/3133/3568/683/7293/4615/1437/283234	18		GO:0033313	meiotic cell cycle checkpoint signaling	5/351	10/18888	5.02833e-07	5.75808e-06	4.61168e-06	7272/54888/11130/57082/9319	5
GO:0002821	positive regulation of adaptive immune response	16/469	131/18888	1.6318e-07	7.99978e-06	6.35961e-06	909/3134/3717/64127/3106/3135/3553/6891/100/3105/3133/7124/567/3107/4277/54209	16		GO:0051307	meiotic chromosome separation	5/351	10/18888	5.02833e-07	5.75808e-06	4.61168e-06	7272/11130/9700/57082/23397	5
GO:0002220	innate immune response activating cell surface receptor signaling pathway	14/469	100/18888	1.75553e-07	8.50269e-06	6.75941e-06	10333/2534/64127/7097/9111/3656/3823/4067/7096/3822/4792/4615/11027/54209	14		GO:1904666	regulation of ubiquitin protein ligase activity	6/351	18/18888	6.06671e-07	6.88365e-06	5.51315e-06	5347/991/4085/11065/26271/27338	6
GO:0030099	myeloid cell differentiation	31/469	439/18888	1.96458e-07	9.31348e-06	7.40396e-06	5371/3428/3717/81501/7097/9935/1053/5777/4067/133396/799/4094/9290/90865/116071/3988/7124/440712/4792/2113/567/4615/10019/1437/9398/3605/5305/8837/4318/54209/55509	31		GO:0046605	regulation of centrosome cycle	9/351	54/18888	6.0729e-07	6.88365e-06	5.51315e-06	284403/348654/899/55835/10733/7514/6790/163786/6491	9
GO:1990868	response to chemokine	14/469	101/18888	1.99244e-07	9.31348e-06	7.40396e-06	6356/10803/3579/6366/414062/4067/6368/6370/2532/10019/1232/7852/6369/54209	14		GO:1900087	positive regulation of G1/S transition of mitotic cell cycle	9/351	55/18888	7.14339e-07	8.05615e-06	6.45221e-06	990/6241/55835/898/9134/6240/27085/163786/6491	9
GO:1990869	cellular response to chemokine	14/469	101/18888	1.99244e-07	9.31348e-06	7.40396e-06	6356/10803/3579/6366/414062/4067/6368/6370/2532/10019/1232/7852/6369/54209	14		GO:0000212	meiotic spindle organization	6/351	19/18888	8.72835e-07	9.79417e-06	7.8442e-06	10403/259266/9700/6790/9133/26271	6
GO:0002706	regulation of lymphocyte mediated immunity	19/469	186/18888	2.04528e-07	9.4506e-06	7.51297e-06	909/3134/64127/3106/3823/3135/3553/5777/6891/3105/3822/3133/7124/339390/567/3107/1380/4277/54209	19		GO:0051294	establishment of spindle orientation	8/351	42/18888	8.93241e-07	9.93699e-06	7.95858e-06	29899/1058/10403/5347/4085/54908/10615/89958	8
GO:0098543	detection of other organism	7/469	19/18888	2.16561e-07	9.89289e-06	7.86458e-06	10333/64127/7097/3106/10392/7096/3105	7		GO:0045835	negative regulation of meiotic nuclear division	5/351	11/18888	9.07813e-07	9.93699e-06	7.95858e-06	11130/57082/9319/286151/26271	5
GO:0070372	regulation of ERK1 and ERK2 cascade	25/469	308/18888	2.34199e-07	1.05784e-05	8.40955e-06	6356/64127/6366/10457/414062/3553/5777/4067/2048/799/6368/10392/5320/9290/4914/6370/7124/348/8482/3383/2771/8685/8837/6369/54209	25		GO:0051987	positive regulation of attachment of spindle microtubules to kinetochore	5/351	11/18888	9.07813e-07	9.93699e-06	7.95858e-06	3619/55143/332/9212/891	5
GO:0070371	ERK1 and ERK2 cascade	26/469	332/18888	2.70415e-07	1.20785e-05	9.60209e-06	6356/64127/6366/10457/414062/3553/5777/4067/2048/799/1512/6368/10392/5320/9290/4914/6370/7124/348/8482/3383/2771/8685/8837/6369/54209	26		GO:0060623	regulation of chromosome condensation	5/351	11/18888	9.07813e-07	9.93699e-06	7.95858e-06	64151/54892/9918/10051/23397	5
GO:0032731	positive regulation of interleukin-1 beta production	11/469	62/18888	3.19326e-07	1.41065e-05	1.12143e-05	10333/3428/3717/64127/22900/113277/10392/7124/4615/11027/3605	11		GO:1902412	regulation of mitotic cytokinesis	5/351	11/18888	9.07813e-07	9.93699e-06	7.95858e-06	3619/55143/9585/332/9212	5
GO:0002698	negative regulation of immune effector process	15/469	121/18888	3.26628e-07	1.42722e-05	1.1346e-05	3134/64127/3106/3566/3135/5777/933/90865/3105/3133/7124/339390/1380/11213/54	15		GO:0097421	liver regeneration	7/351	30/18888	1.01574e-06	1.10641e-05	8.86129e-06	87178/6426/2146/6790/7298/5111/8140	7
GO:0001914	regulation of T cell mediated cytotoxicity	10/469	50/18888	3.41558e-07	1.47641e-05	1.17371e-05	909/3134/3106/3135/6891/3105/3133/567/3107/4277	10		GO:0032506	cytokinetic process	8/351	43/18888	1.07979e-06	1.17047e-05	9.37436e-06	29127/54443/1894/9585/55165/10112/128239/9212	8
GO:0032635	interleukin-6 production	18/469	176/18888	4.2002e-07	1.77735e-05	1.41294e-05	10333/64127/7097/3106/23208/400709/3553/5777/113277/10392/90865/7096/7124/4615/11027/3605/11213/54209	18		GO:0009411	response to UV	14/351	154/18888	1.13966e-06	1.2294e-05	9.84636e-06	54962/55872/675/2237/9768/51514/2956/993/4436/7398/1032/5111/9212/83695	14
GO:0032675	regulation of interleukin-6 production	18/469	176/18888	4.2002e-07	1.77735e-05	1.41294e-05	10333/64127/7097/3106/23208/400709/3553/5777/113277/10392/90865/7096/7124/4615/11027/3605/11213/54209	18		GO:0007064	mitotic sister chromatid cohesion	7/351	31/18888	1.29118e-06	1.38616e-05	1.11018e-05	991/113130/79075/157570/699/83903/151648	7
GO:0009595	detection of biotic stimulus	9/469	40/18888	4.58517e-07	1.92004e-05	1.52638e-05	10333/64127/7097/3106/5795/10392/7096/3105/54209	9		GO:0090306	meiotic spindle assembly	5/351	12/18888	1.53254e-06	1.6374e-05	1.3114e-05	10403/259266/6790/9133/26271	5
GO:0032760	positive regulation of tumor necrosis factor production	14/469	109/18888	5.19668e-07	2.15367e-05	1.71211e-05	3717/64127/7097/120892/5795/113277/2048/10392/90865/7096/3133/4615/11027/3605	14		GO:0090169	regulation of spindle assembly	7/351	32/18888	1.6265e-06	1.72952e-05	1.38518e-05	29899/126731/5347/55835/10615/163786/6491	7
GO:0032611	interleukin-1 beta production	14/469	110/18888	5.82141e-07	2.36385e-05	1.87919e-05	10333/5371/3428/3717/64127/22900/113277/10392/7124/4615/11027/3605/54/54209	14		GO:0016446	somatic hypermutation of immunoglobulin genes	5/351	13/18888	2.45246e-06	2.58319e-05	2.06889e-05	10721/9156/2956/4436/7374	5
GO:0032651	regulation of interleukin-1 beta production	14/469	110/18888	5.82141e-07	2.36385e-05	1.87919e-05	10333/5371/3428/3717/64127/22900/113277/10392/7124/4615/11027/3605/54/54209	14		GO:0090235	regulation of metaphase plate congression	5/351	13/18888	2.45246e-06	2.58319e-05	2.06889e-05	3619/55143/10615/332/9212	5
GO:0042531	positive regulation of tyrosine phosphorylation of STAT protein	11/469	66/18888	6.1711e-07	2.48078e-05	1.97215e-05	2534/2322/3717/11009/4067/133396/2688/8995/7124/1437/5008	11		GO:0000132	establishment of mitotic spindle orientation	7/351	35/18888	3.09745e-06	3.23206e-05	2.58857e-05	29899/1058/10403/5347/4085/54908/89958	7
GO:0071356	cellular response to tumor necrosis factor	21/469	241/18888	6.87748e-07	2.73737e-05	2.17614e-05	837/6356/3717/81501/22900/6366/7114/414062/355/6368/1393/8995/1540/115650/6370/970/7124/4792/9705/7293/6369	21		GO:0006301	postreplication repair	7/351	35/18888	3.09745e-06	3.23206e-05	2.58857e-05	10721/5427/9768/51514/4436/7398/5111	7
GO:0051607	defense response to virus	24/469	307/18888	8.05509e-07	3.16922e-05	2.51944e-05	5371/3428/340061/22900/7097/3660/91607/200316/3553/3669/6737/9020/3588/90865/197259/246778/84166/7124/3455/4615/64108/3663/4321/4277	24		GO:0031100	animal organ regeneration	9/351	66/18888	3.47476e-06	3.6089e-05	2.89039e-05	87178/6426/890/2146/6790/7298/983/5111/8140	9
GO:1903557	positive regulation of tumor necrosis factor superfamily cytokine production	14/469	113/18888	8.12015e-07	3.16922e-05	2.51944e-05	3717/64127/7097/120892/5795/113277/2048/10392/90865/7096/3133/4615/11027/3605	14		GO:0001833	inner cell mass cell proliferation	5/351	14/18888	3.75688e-06	3.86595e-05	3.09626e-05	675/1111/54892/84296/9837	5
GO:1904646	cellular response to amyloid-beta	9/469	43/18888	8.85123e-07	3.42134e-05	2.71987e-05	837/10333/2534/154/2048/7124/3383/5641/54209	9		GO:0002566	somatic diversification of immune receptors via somatic mutation	5/351	14/18888	3.75688e-06	3.86595e-05	3.09626e-05	10721/9156/2956/4436/7374	5
GO:0002440	production of molecular mediator of immune response	24/469	310/18888	9.58419e-07	3.66937e-05	2.91705e-05	3134/7441/64127/29802/3566/3135/3553/2048/144811/10392/8013/933/90865/3105/3133/7124/8482/7293/567/4615/3605/11213/3663/54	24		GO:0040020	regulation of meiotic nuclear division	7/351	36/18888	3.78419e-06	3.87619e-05	3.10446e-05	11130/991/57082/9319/10635/286151/26271	7
GO:0002711	positive regulation of T cell mediated immunity	11/469	69/18888	9.79961e-07	3.71646e-05	2.95448e-05	909/3134/3106/3135/3553/6891/3105/3133/567/3107/4277	11		GO:0022412	cellular process involved in reproduction in multicellular organism	25/351	482/18888	4.2095e-06	4.29216e-05	3.43761e-05	3148/5901/675/7272/994/7153/83990/54888/2189/2175/10403/5347/145508/259266/63979/57082/9319/6790/9133/23397/84930/2176/81930/4436/26271	25
GO:0002709	regulation of T cell mediated immunity	13/469	99/18888	1.02475e-06	3.85e-05	3.06065e-05	909/3134/64127/3106/3135/3553/6891/3105/3133/339390/567/3107/4277	13		GO:0008156	negative regulation of DNA replication	6/351	25/18888	5.18472e-06	5.26249e-05	4.21475e-05	54962/990/81620/8914/26271/51053	6
GO:0002705	positive regulation of leukocyte mediated immunity	16/469	150/18888	1.0489e-06	3.90425e-05	3.10377e-05	909/3134/64127/3106/3823/3135/3553/6891/3105/3822/3133/7124/567/3107/4277/54209	16		GO:0071479	cellular response to ionizing radiation	9/351	70/18888	5.71956e-06	5.77908e-05	4.6285e-05	675/11200/63979/641/1894/10635/5888/580/83695	9
GO:0002437	inflammatory response to antigenic stimulus	12/469	84/18888	1.06787e-06	3.93837e-05	3.1309e-05	2534/64127/3579/4067/133396/10800/2205/2215/3133/7124/3568/54209	12		GO:0019985	translesion synthesis	6/351	26/18888	6.63516e-06	6.66475e-05	5.33783e-05	10721/5427/9768/51514/7398/5111	6
GO:0032755	positive regulation of interleukin-6 production	13/469	101/18888	1.29234e-06	4.72292e-05	3.75459e-05	10333/64127/7097/400709/3553/113277/10392/90865/7096/7124/4615/11027/3605	13		GO:2000779	regulation of double-strand break repair	12/351	132/18888	6.6558e-06	6.66475e-05	5.33783e-05	116028/10721/1111/63979/2187/7468/2305/10635/5888/8914/79000/55010	12
GO:0002685	regulation of leukocyte migration	20/469	230/18888	1.3076e-06	4.73563e-05	3.7647e-05	326/64127/3579/6366/4067/100/80024/8995/6401/90865/6370/7124/683/3162/3383/4615/5641/6369/54209/6403	20		GO:0010569	regulation of double-strand break repair via homologous recombination	9/351	72/18888	7.24538e-06	7.22274e-05	5.78473e-05	116028/10721/1111/63979/2187/10635/5888/8914/55010	9
GO:0097028	dendritic cell differentiation	9/469	45/18888	1.33097e-06	4.77723e-05	3.79777e-05	2322/81501/3106/3135/4067/116071/1437/54209/55509	9		GO:0071478	cellular response to radiation	14/351	181/18888	7.64932e-06	7.59153e-05	6.08009e-05	55872/675/11200/63979/641/1894/10635/5888/580/993/5111/1408/9212/83695	14
GO:0050830	defense response to Gram-positive bacterium	14/469	118/18888	1.37985e-06	4.90885e-05	3.9024e-05	837/163351/64127/7097/3553/10392/5320/3105/3133/7124/6035/4615/3605/54	14		GO:0045859	regulation of protein kinase activity	24/351	470/18888	8.53548e-06	8.43351e-05	6.75444e-05	9088/1062/990/22974/5347/899/84722/995/641/898/79866/890/2146/1894/1033/9133/9134/7804/63967/993/9928/1032/55732/891	24
GO:0140895	cell surface toll-like receptor signaling pathway	11/469	72/18888	1.51873e-06	5.34451e-05	4.24873e-05	10333/64127/7097/9111/3656/4067/7096/4792/4615/11027/54209	11		GO:0051782	negative regulation of cell division	5/351	17/18888	1.10904e-05	0.000109096	8.73759e-05	259266/641/79733/144455/9212	5
GO:0002832	negative regulation of response to biotic stimulus	14/469	119/18888	1.5289e-06	5.34451e-05	4.24873e-05	3134/3428/22900/3106/9111/3135/6737/84166/3105/3133/11027/11213/4321/4277	14		GO:0031110	regulation of microtubule polymerization or depolymerization	10/351	96/18888	1.18204e-05	0.000115768	9.27189e-05	220134/22974/93323/81624/84722/3925/26586/221150/348235/9793	10
GO:0002218	activation of innate immune response	23/469	298/18888	1.70091e-06	5.89452e-05	4.68598e-05	54941/10333/3428/2534/64127/340061/22900/7097/9111/3656/3823/4067/144811/10392/1540/7096/3822/7124/4792/4615/11027/11213/54209	23		GO:2000241	regulation of reproductive process	15/351	214/18888	1.19767e-05	0.000116786	9.35346e-05	9088/7272/994/2175/11130/259266/991/995/57082/9319/6790/10635/993/286151/26271	15
GO:0032732	positive regulation of interleukin-1 production	11/469	73/18888	1.74872e-06	6.00843e-05	4.77654e-05	10333/3428/3717/64127/22900/113277/10392/7124/4615/11027/3605	11		GO:0006282	regulation of DNA repair	15/351	215/18888	1.26615e-05	0.000122926	9.84523e-05	116028/10721/1111/63979/2187/7468/2305/10635/5888/8914/580/7398/5111/79000/55010	15
GO:0002758	innate immune response-activating signaling pathway	22/469	278/18888	1.89404e-06	6.45256e-05	5.12961e-05	54941/10333/2534/64127/340061/22900/7097/9111/3656/3823/4067/144811/10392/1540/7096/3822/7124/4792/4615/11027/11213/54209	22		GO:0007099	centriole replication	7/351	43/18888	1.30642e-05	0.000126288	0.000101144	22995/284403/1017/55835/10733/163786/6491	7
GO:0071219	cellular response to molecule of bacterial origin	20/469	238/18888	2.22267e-06	7.45896e-05	5.92967e-05	10333/3717/64127/11009/22900/7097/3656/1053/3553/4067/2048/7096/7124/4792/4615/1437/11027/11213/4318/54209	20		GO:0071168	protein localization to chromatin	8/351	60/18888	1.44757e-05	0.000139329	0.000111589	253714/1058/5347/2146/7443/157570/84515/4436	8
GO:0034134	toll-like receptor 2 signaling pathway	6/469	17/18888	2.22655e-06	7.45896e-05	5.92967e-05	10333/64127/7097/4067/7096/54209	6		GO:0006284	base-excision repair	7/351	44/18888	1.52902e-05	0.000146536	0.000117362	10721/2237/1763/5426/55247/5111/7374	7
GO:0051092	positive regulation of NF-kappaB transcription factor activity	15/469	141/18888	2.35246e-06	7.81561e-05	6.2132e-05	6283/10333/64127/7097/5583/3656/3553/6737/10392/8995/4914/7124/4615/11213/8837	15		GO:0044837	actomyosin contractile ring organization	4/351	10/18888	2.25351e-05	0.000215047	0.000172232	29127/54443/1894/128239	4
GO:0034341	response to type II interferon	15/469	142/18888	2.57142e-06	8.47305e-05	6.73584e-05	6356/3717/163351/7097/8942/6366/51667/414062/6737/6368/84166/6370/7124/6369/2643	15		GO:0006403	RNA localization	14/351	200/18888	2.36968e-05	0.00022517	0.00018034	5901/7884/1736/54888/22948/3181/87178/55706/6426/11260/10212/7514/8570/9793	14
GO:0042267	natural killer cell mediated cytotoxicity	11/469	76/18888	2.63225e-06	8.60297e-05	6.83912e-05	3134/3106/3823/3135/5777/3105/3822/3133/127544/100431172/5873	11		GO:0010824	regulation of centrosome duplication	7/351	47/18888	2.3923e-05	0.000226356	0.00018129	348654/899/55835/10733/7514/163786/6491	7
GO:0002526	acute inflammatory response	13/469	109/18888	3.09246e-06	0.000100256	7.97004e-05	1776/3579/50616/5265/3553/133396/2205/3988/2215/3133/7124/5008/23780	13		GO:0098534	centriole assembly	7/351	48/18888	2.75649e-05	0.000259715	0.000208007	22995/284403/1017/55835/10733/163786/6491	7
GO:0042509	regulation of tyrosine phosphorylation of STAT protein	11/469	78/18888	3.41919e-06	0.000108537	8.62837e-05	2534/2322/3717/11009/4067/133396/2688/8995/7124/1437/5008	11		GO:0045910	negative regulation of DNA recombination	7/351	49/18888	3.16511e-05	0.000296962	0.000237839	116028/10721/641/2187/2956/4436/55010	7
GO:0042116	macrophage activation	13/469	110/18888	3.42889e-06	0.000108537	8.62837e-05	10333/3717/7097/120892/9111/3566/23208/113277/133396/90865/7096/7124/54209	13		GO:0006298	mismatch repair	6/351	35/18888	4.06253e-05	0.000379566	0.000303997	10535/9156/2956/84515/4436/5111	6
GO:0071347	cellular response to interleukin-1	13/469	110/18888	3.42889e-06	0.000108537	8.62837e-05	6356/6366/3656/414062/3553/6368/6370/4792/9705/4615/3605/11213/6369	13		GO:0071900	regulation of protein serine/threonine kinase activity	16/351	267/18888	4.27052e-05	0.000397336	0.000318229	9088/990/5347/899/84722/995/641/898/890/2146/1033/9133/9134/993/1032/891	16
GO:0032946	positive regulation of mononuclear cell proliferation	15/469	146/18888	3.64127e-06	0.000114359	9.0912e-05	3717/6708/3553/2048/6480/100/11148/3105/115650/970/3133/683/7293/4615/283234	15		GO:0001832	blastocyst growth	5/351	22/18888	4.37213e-05	0.000405102	0.000324449	675/1111/54892/84296/9837	5
GO:0002228	natural killer cell mediated immunity	11/469	79/18888	3.88471e-06	0.000120127	9.54979e-05	3134/3106/3823/3135/5777/3105/3822/3133/127544/100431172/5873	11		GO:0050657	nucleic acid transport	12/351	161/18888	4.90849e-05	0.000451056	0.000361253	5901/7884/54888/3181/87178/55706/6426/11260/10212/7514/8570/9793	12
GO:0002752	cell surface pattern recognition receptor signaling pathway	11/469	79/18888	3.88471e-06	0.000120127	9.54979e-05	10333/64127/7097/9111/3656/4067/7096/4792/4615/11027/54209	11		GO:0050658	RNA transport	12/351	161/18888	4.90849e-05	0.000451056	0.000361253	5901/7884/54888/3181/87178/55706/6426/11260/10212/7514/8570/9793	12
GO:0002269	leukocyte activation involved in inflammatory response	9/469	51/18888	4.00422e-06	0.00012164	9.67004e-05	10333/3717/7097/120892/23208/90865/7124/4615/54209	9		GO:0007129	homologous chromosome pairing at meiosis	7/351	53/18888	5.3294e-05	0.000487728	0.000390624	83990/55706/898/9319/2177/9134/84057	7
GO:0032612	interleukin-1 production	14/469	129/18888	4.02441e-06	0.00012164	9.67004e-05	10333/5371/3428/3717/64127/22900/113277/10392/7124/4615/11027/3605/54/54209	14		GO:0051236	establishment of RNA localization	12/351	164/18888	5.87539e-05	0.0005355	0.000428884	5901/7884/54888/3181/87178/55706/6426/11260/10212/7514/8570/9793	12
GO:0032652	regulation of interleukin-1 production	14/469	129/18888	4.02441e-06	0.00012164	9.67004e-05	10333/5371/3428/3717/64127/22900/113277/10392/7124/4615/11027/3605/54/54209	14		GO:0051438	regulation of ubiquitin-protein transferase activity	6/351	38/18888	6.59284e-05	0.000598448	0.0004793	5347/991/4085/11065/26271/27338	6
GO:0050851	antigen receptor-mediated signaling pathway	18/469	208/18888	4.72542e-06	0.000141057	0.000112137	2534/7006/29760/5583/9214/23149/5795/5777/4067/696/100/11148/933/1540/3105/3988/4792/79908	18		GO:0031145	anaphase-promoting complex-dependent catabolic process	5/351	24/18888	6.84444e-05	0.00061877	0.000495576	1017/5347/991/11065/27338	5
GO:0006968	cellular defense response	9/469	52/18888	4.73699e-06	0.000141057	0.000112137	10803/3579/9214/3823/3135/922/90865/3822/1232	9		GO:0006997	nucleus organization	11/351	143/18888	7.58402e-05	0.000682868	0.000546912	3148/23306/1104/1111/84823/5347/55706/7443/983/57673/4001	11
GO:0002275	myeloid cell activation involved in immune response	12/469	97/18888	5.03401e-06	0.0001488	0.000118292	1776/9111/3566/5777/4067/2205/8013/90865/7124/4615/11027/54209	12		GO:0002200	somatic diversification of immune receptors	8/351	76/18888	8.24415e-05	0.000739324	0.000592129	3148/10721/79915/9156/7468/2956/4436/7374	8
GO:0007260	tyrosine phosphorylation of STAT protein	11/469	82/18888	5.62993e-06	0.000165199	0.000131329	2534/2322/3717/11009/4067/133396/2688/8995/7124/1437/5008	11		GO:0006312	mitotic recombination	5/351	25/18888	8.42593e-05	0.000752604	0.000602764	675/348654/25788/5888/4436	5
GO:0097696	receptor signaling pathway via STAT	17/469	191/18888	5.94729e-06	0.000173247	0.000137727	2534/2322/3717/11009/9111/4067/133396/2048/2688/64109/8995/3588/7124/3455/10019/1437/5008	17		GO:0007100	mitotic centrosome separation	4/351	14/18888	0.000101266	0.000893778	0.000715832	4751/1111/3832/6790	4
GO:0006935	chemotaxis	29/469	466/18888	6.07798e-06	0.00017578	0.000139741	6283/1890/10371/6356/10803/64127/3579/6366/10457/7114/414062/5795/3553/1800/4067/5168/6480/80024/6368/10800/9023/6370/683/8482/1232/5641/7852/6369/54209	29		GO:0033262	regulation of nuclear cell cycle DNA replication	4/351	14/18888	0.000101266	0.000893778	0.000715832	54962/10926/8317/81620	4
GO:0034135	regulation of toll-like receptor 2 signaling pathway	5/469	12/18888	6.3359e-06	0.000181931	0.00014463	10333/64127/4067/7096/54209	5		GO:0045842	positive regulation of mitotic metaphase/anaphase transition	4/351	14/18888	0.000101266	0.000893778	0.000715832	9787/991/9700/11065	4
GO:0050729	positive regulation of inflammatory response	15/469	153/18888	6.49875e-06	0.000185283	0.000147295	6283/837/7097/120892/9111/3553/5320/90865/3133/7124/4792/2113/5008/6369/54209	15		GO:0072331	signal transduction by p53 class mediator	12/351	177/18888	0.000122107	0.00107349	0.00085976	675/1111/79915/11200/51512/1870/2305/6790/144455/4436/1869/9212	12
GO:0042330	taxis	29/469	468/18888	6.59862e-06	0.000186806	0.000148506	6283/1890/10371/6356/10803/64127/3579/6366/10457/7114/414062/5795/3553/1800/4067/5168/6480/80024/6368/10800/9023/6370/683/8482/1232/5641/7852/6369/54209	29		GO:0051785	positive regulation of nuclear division	7/351	61/18888	0.000132836	0.00116323	0.000931636	9787/991/9700/11065/6790/10635/51203	7
GO:0042113	B cell activation	21/469	278/18888	6.69699e-06	0.000188265	0.000149666	2322/64127/29760/5795/5777/4067/2048/100/933/1540/4914/115650/970/9452/683/7293/4066/1380/222487/3087/30011	21		GO:0051299	centrosome separation	4/351	15/18888	0.000136071	0.00118229	0.000946898	4751/1111/3832/6790	4
GO:0033209	tumor necrosis factor-mediated signaling pathway	13/469	117/18888	6.83912e-06	0.000190925	0.000151781	837/3717/22900/7114/355/8995/1540/115650/970/7124/4792/9705/7293	13		GO:1902101	positive regulation of metaphase/anaphase transition of cell cycle	4/351	15/18888	0.000136071	0.00118229	0.000946898	9787/991/9700/11065	4
GO:0032496	response to lipopolysaccharide	24/469	348/18888	7.1298e-06	0.000197668	0.00015714	4353/3717/64127/11009/22900/7097/3656/1053/5732/3553/4067/2048/6401/7124/4792/4615/1437/11027/11213/4318/54/2643/54209/6403	24		GO:0045840	positive regulation of mitotic nuclear division	6/351	44/18888	0.000153499	0.00132854	0.00106403	9787/991/9700/11065/6790/51203	6
GO:0007259	receptor signaling pathway via JAK-STAT	16/469	174/18888	7.35844e-06	0.000202609	0.000161069	2534/2322/3717/11009/9111/4067/133396/2048/2688/8995/3588/7124/3455/10019/1437/5008	16		GO:0010833	telomere maintenance via telomere lengthening	8/351	83/18888	0.000154104	0.00132862	0.0010641	4751/1736/22948/3181/5888/80119/64858/9212	8
GO:0070555	response to interleukin-1	14/469	138/18888	8.87193e-06	0.000241284	0.000191814	6356/6366/3656/414062/3553/6368/6401/6370/4792/9705/4615/3605/11213/6369	14		GO:0016445	somatic diversification of immunoglobulins	7/351	66/18888	0.00021905	0.0018813	0.00150674	10721/79915/9156/7468/2956/4436/7374	7
GO:0002573	myeloid leukocyte differentiation	19/469	239/18888	8.8831e-06	0.000241284	0.000191814	3428/81501/7097/9935/1053/4067/133396/799/9290/90865/116071/7124/4615/1437/9398/3605/4318/54209/55509	19		GO:0010458	exit from mitosis	5/351	31/18888	0.000245912	0.00210392	0.00168504	54443/11065/113130/9735/27338	5
GO:0032490	detection of molecule of bacterial origin	5/469	13/18888	1.00858e-05	0.0002703	0.000214881	10333/64127/7097/7096/54209	5		GO:0006305	DNA alkylation	6/351	48/18888	0.000250709	0.00212864	0.00170484	3070/2146/1786/57673/54069/1789	6
GO:0032494	response to peptidoglycan	5/469	13/18888	1.00858e-05	0.0002703	0.000214881	64127/4615/11213/3663/54209	5		GO:0006306	DNA methylation	6/351	48/18888	0.000250709	0.00212864	0.00170484	3070/2146/1786/57673/54069/1789	6
GO:0002707	negative regulation of lymphocyte mediated immunity	9/469	57/18888	1.03781e-05	0.00027421	0.00021799	3134/64127/3106/3135/5777/3105/3133/339390/1380	9		GO:0051642	centrosome localization	5/351	32/18888	0.000287049	0.0024188	0.00193723	29899/9787/259266/4085/6790	5
GO:0061900	glial cell activation	9/469	57/18888	1.03781e-05	0.00027421	0.00021799	10333/3717/7097/120892/23208/3553/90865/7124/54209	9		GO:0061842	microtubule organizing center localization	5/351	32/18888	0.000287049	0.0024188	0.00193723	29899/9787/259266/4085/6790	5
GO:0032642	regulation of chemokine production	12/469	104/18888	1.04364e-05	0.00027421	0.00021799	326/64127/7097/3566/3553/90865/7124/3162/2532/4615/3605/54209	12		GO:0007096	regulation of exit from mitosis	4/351	18/18888	0.000291876	0.00245022	0.00196239	54443/11065/113130/9735	4
GO:0032722	positive regulation of chemokine production	10/469	72/18888	1.09468e-05	0.000285755	0.000227167	326/64127/7097/3566/3553/90865/7124/3162/4615/3605	10		GO:0002562	somatic diversification of immune receptors via germline recombination within a single locus	7/351	70/18888	0.000316477	0.00263692	0.00211192	3148/79915/9156/7468/2956/4436/7374	7
GO:0071216	cellular response to biotic stimulus	20/469	265/18888	1.12168e-05	0.000290128	0.000230643	10333/3717/64127/11009/22900/7097/3656/1053/3553/4067/2048/7096/7124/4792/4615/1437/11027/11213/4318/54209	20		GO:0016444	somatic cell DNA recombination	7/351	70/18888	0.000316477	0.00263692	0.00211192	3148/79915/9156/7468/2956/4436/7374	7
GO:0045824	negative regulation of innate immune response	11/469	88/18888	1.12587e-05	0.000290128	0.000230643	3134/3428/3106/9111/3135/6737/84166/3105/3133/11213/4321	11		GO:0001556	oocyte maturation	5/351	33/18888	0.000333201	0.00276594	0.00221525	675/994/9319/6790/26271	5
GO:0032602	chemokine production	12/469	105/18888	1.15223e-05	0.000295029	0.00023454	326/64127/7097/3566/3553/90865/7124/3162/2532/4615/3605/54209	12		GO:0051261	protein depolymerization	9/351	117/18888	0.000338533	0.00279979	0.00224237	126731/22974/81624/11004/3925/26586/146909/81930/9793	9
GO:0042129	regulation of T cell proliferation	16/469	181/18888	1.2141e-05	0.000308903	0.000245569	3717/6708/10457/3135/3553/5777/11148/8995/5320/246778/3105/115650/970/3133/339390/283234	16		GO:0046785	microtubule polymerization	8/351	95/18888	0.000391752	0.00322798	0.00258531	22974/93323/81624/84722/55835/3925/26271/9793	8
GO:0050671	positive regulation of lymphocyte proliferation	14/469	143/18888	1.33711e-05	0.000338062	0.00026875	3717/6708/3553/2048/100/11148/3105/115650/970/3133/683/7293/4615/283234	14		GO:0015931	nucleobase-containing compound transport	13/351	231/18888	0.000405234	0.0033268	0.00266445	5901/7884/54888/3181/87178/55706/6426/11260/10212/7514/8570/60386/9793	13
GO:0018108	peptidyl-tyrosine phosphorylation	20/469	269/18888	1.39714e-05	0.000349419	0.000277778	4058/2534/2322/3717/64127/11009/5795/5777/4067/133396/2048/5168/2688/8995/4914/7124/683/1437/5008/54209	20		GO:0002204	somatic recombination of immunoglobulin genes involved in immune response	6/351	53/18888	0.000433898	0.00352325	0.00282179	79915/9156/7468/2956/4436/7374	6
GO:0030593	neutrophil chemotaxis	12/469	107/18888	1.39941e-05	0.000349419	0.000277778	6283/6356/64127/3579/6366/414062/3553/1800/6368/6370/683/6369	12		GO:0002208	somatic diversification of immunoglobulins involved in immune response	6/351	53/18888	0.000433898	0.00352325	0.00282179	79915/9156/7468/2956/4436/7374	6
GO:0050731	positive regulation of peptidyl-tyrosine phosphorylation	15/469	164/18888	1.508e-05	0.000374209	0.000297485	2534/2322/3717/64127/11009/5795/4067/133396/5168/2688/8995/7124/1437/5008/54209	15		GO:0045190	isotype switching	6/351	53/18888	0.000433898	0.00352325	0.00282179	79915/9156/7468/2956/4436/7374	6
GO:0002920	regulation of humoral immune response	8/469	46/18888	1.55063e-05	0.000381531	0.000303306	64127/3553/5777/922/7124/1380/3605/54209	8		GO:2000780	negative regulation of double-strand break repair	5/351	36/18888	0.000505676	0.00409121	0.00327667	116028/10721/2187/79000/55010	5
GO:0018212	peptidyl-tyrosine modification	20/469	271/18888	1.55649e-05	0.000381531	0.000303306	4058/2534/2322/3717/64127/11009/5795/5777/4067/133396/2048/5168/2688/8995/4914/7124/683/1437/5008/54209	20		GO:0006998	nuclear envelope organization	6/351	55/18888	0.000531129	0.00428163	0.00342918	23306/1104/84823/5347/7443/4001	6
GO:1990266	neutrophil migration	13/469	129/18888	1.98651e-05	0.000483987	0.000384756	6283/6356/64127/3579/6366/414062/3553/1800/6368/6370/683/4615/6369	13		GO:0051443	positive regulation of ubiquitin-protein transferase activity	4/351	21/18888	0.000546284	0.00436586	0.00349664	5347/991/11065/27338	4
GO:0001774	microglial cell activation	8/469	48/18888	2.14709e-05	0.000519958	0.000413352	10333/3717/7097/120892/23208/90865/7124/54209	8		GO:2000001	regulation of DNA damage checkpoint	4/351	21/18888	0.000546284	0.00436586	0.00349664	675/5888/79968/580	4
GO:0002366	leukocyte activation involved in immune response	21/469	301/18888	2.2338e-05	0.000537718	0.000427471	3134/1776/9111/3566/5777/4067/100/2205/8995/8013/90865/246778/3822/7124/9452/3383/4615/100431172/11027/5873/54209	21		GO:0001701	in utero embryonic development	18/351	401/18888	0.000547444	0.00436586	0.00349664	4751/675/55723/1111/54888/81624/7516/6241/54892/10733/79733/144455/9133/4436/84296/9837/891/6491	18
GO:0006959	humoral immune response	19/469	258/18888	2.60566e-05	0.000623498	0.000495664	6283/326/64127/29760/9214/5699/3553/5777/922/6480/715/3105/9308/3133/7124/683/1380/3605/54209	19		GO:0006304	DNA modification	8/351	100/18888	0.000553615	0.00439936	0.00352347	55247/3070/2146/1786/57673/54069/1789/7374	8
GO:0002263	cell activation involved in immune response	21/469	305/18888	2.71617e-05	0.000646094	0.000513627	3134/1776/9111/3566/5777/4067/100/2205/8995/8013/90865/246778/3822/7124/9452/3383/4615/100431172/11027/5873/54209	21		GO:2000242	negative regulation of reproductive process	7/351	78/18888	0.000614576	0.00486648	0.00389759	9088/7272/11130/57082/9319/286151/26271	7
GO:0002221	pattern recognition receptor signaling pathway	19/469	259/18888	2.74865e-05	0.000649975	0.000516713	54941/10333/64127/340061/22900/7097/9111/3656/4067/144811/10392/1540/7096/7124/4792/4615/11027/11213/54209	19		GO:0030010	establishment of cell polarity	10/351	154/18888	0.000623136	0.00491683	0.00393792	29899/1058/10403/81624/5347/4085/54908/9585/10615/89958	10
GO:0042742	defense response to bacterium	22/469	330/18888	2.8779e-05	0.000676558	0.000537845	6283/837/4353/10333/163351/64127/7097/23208/284110/400709/3553/10392/5320/3105/3133/7124/6035/4615/3605/54/54209/6403	22		GO:0008630	intrinsic apoptotic signaling pathway in response to DNA damage	8/351	102/18888	0.000631864	0.00496814	0.00397901	675/79915/11200/220042/2956/4436/1032/1869	8
GO:0019884	antigen processing and presentation of exogenous antigen	8/469	50/18888	2.92496e-05	0.000679672	0.000540321	909/3134/6891/1514/3105/3133/567/5641	8		GO:0072698	protein localization to microtubule cytoskeleton	6/351	57/18888	0.000644504	0.00504975	0.00404437	7272/81610/6790/9585/10615/6491	6
GO:0061082	myeloid leukocyte cytokine production	8/469	50/18888	2.92496e-05	0.000679672	0.000540321	64127/3135/10392/8013/8482/4615/11213/54	8		GO:0045738	negative regulation of DNA repair	5/351	38/18888	0.000653141	0.00508175	0.00407	116028/10721/2187/79000/55010	5
GO:0010934	macrophage cytokine production	7/469	37/18888	3.00479e-05	0.000690244	0.000548725	64127/3135/10392/8482/4615/11213/54	7		GO:1904358	positive regulation of telomere maintenance via telomere lengthening	5/351	38/18888	0.000653141	0.00508175	0.00407	4751/1736/22948/3181/9212	5
GO:0010935	regulation of macrophage cytokine production	7/469	37/18888	3.00479e-05	0.000690244	0.000548725	64127/3135/10392/8482/4615/11213/54	7		GO:0002381	immunoglobulin production involved in immunoglobulin-mediated immune response	6/351	58/18888	0.000707791	0.00548784	0.00439524	79915/9156/7468/2956/4436/7374	6
GO:0051345	positive regulation of hydrolase activity	28/469	482/18888	3.07102e-05	0.00070145	0.000557633	3428/2534/6356/3717/22900/5660/6366/23526/344/414062/4067/355/1512/1285/6368/51291/1514/10392/9290/25780/6401/4914/6370/7124/9705/2889/5641/6369	28		GO:0031507	heterochromatin formation	8/351	105/18888	0.00076575	0.00591667	0.00473869	1017/84823/3070/29128/2146/1786/57673/4001	8
GO:0097530	granulocyte migration	14/469	154/18888	3.09152e-05	0.000702143	0.000558184	6283/6356/64127/3579/6366/414062/3553/1800/6368/6370/683/4615/3605/6369	14		GO:0046599	regulation of centriole replication	4/351	23/18888	0.000784901	0.00602297	0.00482382	55835/10733/163786/6491	4
GO:0051090	regulation of DNA-binding transcription factor activity	24/469	381/18888	3.16587e-05	0.000714988	0.000568396	6283/10333/64127/340061/22900/7097/5583/3656/3553/2100/6737/10392/8995/1540/4914/84166/7124/4792/57413/7293/4615/222487/11213/8837	24		GO:2000042	negative regulation of double-strand break repair via homologous recombination	4/351	23/18888	0.000784901	0.00602297	0.00482382	116028/10721/2187/55010	4
GO:0034374	low-density lipoprotein particle remodeling	5/469	16/18888	3.21809e-05	0.000718706	0.000571352	4353/5320/348/3990/1071	5		GO:0016447	somatic recombination of immunoglobulin gene segments	6/351	61/18888	0.000926797	0.00704156	0.00563962	79915/9156/7468/2956/4436/7374	6
GO:0051770	positive regulation of nitric-oxide synthase biosynthetic process	5/469	16/18888	3.21809e-05	0.000718706	0.000571352	3717/64127/7097/120892/90865	5		GO:0044380	protein localization to cytoskeleton	6/351	61/18888	0.000926797	0.00704156	0.00563962	7272/81610/6790/9585/10615/6491	6
GO:0030098	lymphocyte differentiation	26/469	432/18888	3.25438e-05	0.000722797	0.000574604	326/2322/10803/29760/3566/9935/3135/5795/3553/5777/100/1514/1540/4914/246778/3988/9308/9452/339390/567/4066/1380/222487/3087/864/6932	26		GO:0070601	centromeric sister chromatid cohesion	3/351	11/18888	0.000939716	0.00704156	0.00563962	699/151648/701	3
GO:0150076	neuroinflammatory response	10/469	83/18888	3.8938e-05	0.000860058	0.000683722	10333/3717/7097/120892/23208/3553/90865/7124/4318/54209	10		GO:0072697	protein localization to cell cortex	3/351	11/18888	0.000939716	0.00704156	0.00563962	29899/5347/89958	3
GO:0002704	negative regulation of leukocyte mediated immunity	9/469	68/18888	4.46615e-05	0.000975758	0.000775701	3134/64127/3106/3135/5777/3105/3133/339390/1380	9		GO:0072711	cellular response to hydroxyurea	3/351	11/18888	0.000939716	0.00704156	0.00563962	641/5888/8914	3
GO:0050854	regulation of antigen receptor-mediated signaling pathway	9/469	68/18888	4.46615e-05	0.000975758	0.000775701	5583/9214/5795/5777/4067/100/933/1540/3988	9		GO:1990166	protein localization to site of double-strand break	3/351	11/18888	0.000939716	0.00704156	0.00563962	11073/9656/83695	3
GO:0050730	regulation of peptidyl-tyrosine phosphorylation	17/469	225/18888	4.98978e-05	0.00107844	0.000857327	2534/2322/3717/64127/11009/5795/5777/4067/133396/5168/2688/8995/7124/683/1437/5008/54209	17		GO:1990918	double-strand break repair involved in meiotic recombination	3/351	11/18888	0.000939716	0.00704156	0.00563962	83990/2177/5888	3
GO:0071222	cellular response to lipopolysaccharide	17/469	225/18888	4.98978e-05	0.00107844	0.000857327	3717/64127/11009/22900/7097/3656/1053/3553/4067/2048/7124/4792/4615/1437/11027/11213/4318	17		GO:0045814	negative regulation of gene expression, epigenetic	9/351	135/18888	0.000957943	0.00713401	0.00571367	1111/1017/84823/3070/29128/2146/1786/57673/4001	9
GO:0150077	regulation of neuroinflammatory response	7/469	40/18888	5.10251e-05	0.0010969	0.000872007	120892/23208/3553/90865/7124/4318/54209	7		GO:0072527	pyrimidine-containing compound metabolic process	7/351	84/18888	0.000958443	0.00713401	0.00571367	7084/1503/7083/7298/6240/60386/7374	7
GO:0002548	monocyte chemotaxis	9/469	70/18888	5.64127e-05	0.00120627	0.000958952	6283/6356/6366/414062/4067/6368/6370/5641/6369	9		GO:0048144	fibroblast proliferation	8/351	110/18888	0.00103885	0.00769772	0.00616514	990/1164/890/79733/983/1869/1163/891	8
GO:0071674	mononuclear cell migration	16/469	206/18888	5.94862e-05	0.00126526	0.00100585	6283/326/6356/3579/6366/414062/4067/80024/6368/9023/6370/7124/3383/5641/7852/6369	16		GO:0072528	pyrimidine-containing compound biosynthetic process	5/351	42/18888	0.00104178	0.00769772	0.00616514	7084/1503/7083/7298/60386	5
GO:0002478	antigen processing and presentation of exogenous peptide antigen	7/469	41/18888	6.02269e-05	0.00126843	0.00100837	3134/6891/1514/3105/3133/567/5641	7		GO:0009416	response to light stimulus	15/351	321/18888	0.00104452	0.00769772	0.00616514	54962/55872/675/2237/9768/51514/2956/993/4436/7398/1032/5111/1408/9212/83695	15
GO:0002923	regulation of humoral immune response mediated by circulating immunoglobulin	5/469	18/18888	6.05818e-05	0.00126843	0.00100837	64127/5777/7124/1380/54209	5		GO:1904356	regulation of telomere maintenance via telomere lengthening	6/351	63/18888	0.00109947	0.00807608	0.00646817	4751/1736/22948/3181/80119/9212	6
GO:0150078	positive regulation of neuroinflammatory response	5/469	18/18888	6.05818e-05	0.00126843	0.00100837	120892/3553/90865/7124/54209	5		GO:0007163	establishment or maintenance of cell polarity	12/351	226/18888	0.00111274	0.00814674	0.00652476	29899/1058/10403/81624/5347/4085/11004/54908/9585/10615/89958/9793	12
GO:0002532	production of molecular mediator involved in inflammatory response	11/469	106/18888	6.55406e-05	0.00136005	0.0010812	10333/64127/3566/4067/2048/113/3988/7124/4615/3605/54209	11		GO:0042276	error-prone translesion synthesis	3/351	12/18888	0.00123576	0.00893029	0.00715231	10721/5427/7398	3
GO:0051091	positive regulation of DNA-binding transcription factor activity	17/469	230/18888	6.56343e-05	0.00136005	0.0010812	6283/10333/64127/340061/7097/5583/3656/3553/2100/6737/10392/8995/4914/7124/4615/11213/8837	17		GO:0060707	trophoblast giant cell differentiation	3/351	12/18888	0.00123576	0.00893029	0.00715231	10733/79733/144455	3
GO:0002823	negative regulation of adaptive immune response based on somatic recombination of immune receptors built from immunoglobulin superfamily domains	8/469	56/18888	6.79449e-05	0.00140071	0.00111353	3134/64127/3566/3135/5777/90865/339390/1380	8		GO:0072710	response to hydroxyurea	3/351	12/18888	0.00123576	0.00893029	0.00715231	641/5888/8914	3
GO:0019722	calcium-mediated signaling	17/469	232/18888	7.30628e-05	0.00149853	0.00119129	10803/120892/3579/5795/5533/100/799/933/6401/79772/7124/683/1232/22821/7852/54209/6403	17		GO:0090435	protein localization to nuclear envelope	3/351	12/18888	0.00123576	0.00893029	0.00715231	84823/5347/4001	3
GO:0052547	regulation of peptidase activity	20/469	304/18888	7.91137e-05	0.0016144	0.00128341	3428/2534/3717/22900/274/1475/5265/1800/4067/355/1512/1285/1514/10392/5696/7124/9705/5641/5698/4318	20		GO:0051972	regulation of telomerase activity	5/351	44/18888	0.00129032	0.00929449	0.00744401	4751/1736/3181/80119/9212	5
GO:0006869	lipid transport	26/469	456/18888	7.98242e-05	0.00162067	0.00128839	64220/10396/5660/57476/134429/344/3553/5243/55911/79895/10577/201305/83758/5320/80832/3988/114786/8542/4792/348/80830/5305/3990/1071/54209/23780	26		GO:0070828	heterochromatin organization	9/351	141/18888	0.00130154	0.00934516	0.00748458	1017/84823/3070/3015/29128/2146/1786/57673/4001	9
GO:0033003	regulation of mast cell activation	5/469	19/18888	8.0547e-05	0.00162713	0.00129352	5777/4067/64109/8013/26762	5		GO:0001889	liver development	9/351	143/18888	0.00143595	0.0102772	0.00823106	87178/6426/79733/2146/6790/7298/144455/5111/8140	9
GO:0002507	tolerance induction	6/469	30/18888	8.12096e-05	0.00163231	0.00129764	326/3106/3135/4067/3133/11213	6		GO:1902410	mitotic cytokinetic process	4/351	27/18888	0.00146722	0.0104674	0.0083834	9585/55165/10112/128239	4
GO:0071621	granulocyte chemotaxis	12/469	128/18888	8.37996e-05	0.00167599	0.00133237	6283/6356/64127/3579/6366/414062/3553/1800/6368/6370/683/6369	12		GO:0001824	blastocyst development	8/351	117/18888	0.00154642	0.0109326	0.00875597	4751/675/55723/1111/6241/54892/84296/9837	8
GO:0014015	positive regulation of gliogenesis	9/469	74/18888	8.78371e-05	0.00174804	0.00138965	7097/274/5583/3553/4067/10800/90865/7124/7852	9		GO:0071214	cellular response to abiotic stimulus	15/351	334/18888	0.00154711	0.0109326	0.00875597	55872/675/1111/11200/63979/641/1894/10635/5888/580/993/5111/1408/9212/83695	15
GO:0030595	leukocyte chemotaxis	17/469	237/18888	9.49656e-05	0.0018806	0.00149502	6283/6356/64127/3579/6366/414062/3553/1800/4067/80024/6368/9023/6370/683/5641/7852/6369	17		GO:0104004	cellular response to environmental stimulus	15/351	334/18888	0.00154711	0.0109326	0.00875597	55872/675/1111/11200/63979/641/1894/10635/5888/580/993/5111/1408/9212/83695	15
GO:0002577	regulation of antigen processing and presentation	5/469	20/18888	0.000105214	0.0020337	0.00161673	64127/6366/55080/10392/54209	5		GO:0048469	cell maturation	11/351	205/18888	0.00162923	0.0114766	0.00919167	675/23306/994/81624/59277/9319/6790/7298/132320/9928/26271	11
GO:0045953	negative regulation of natural killer cell mediated cytotoxicity	5/469	20/18888	0.000105214	0.0020337	0.00161673	3134/3106/3135/3105/3133	5		GO:0061008	hepaticobiliary system development	9/351	146/18888	0.0016583	0.0116446	0.00932621	87178/6426/79733/2146/6790/7298/144455/5111/8140	9
GO:0051767	nitric-oxide synthase biosynthetic process	5/469	20/18888	0.000105214	0.0020337	0.00161673	3717/64127/7097/120892/90865	5		GO:0006760	folic acid-containing compound metabolic process	4/351	28/18888	0.00168694	0.011735	0.00939862	1719/10797/7298/8836	4
GO:0051769	regulation of nitric-oxide synthase biosynthetic process	5/469	20/18888	0.000105214	0.0020337	0.00161673	3717/64127/7097/120892/90865	5		GO:0010165	response to X-ray	4/351	28/18888	0.00168694	0.011735	0.00939862	675/7516/641/4436	4
GO:0097529	myeloid leukocyte migration	17/469	239/18888	0.000105226	0.0020337	0.00161673	6283/6356/64127/3579/6366/414062/3553/1800/4067/6368/6370/683/4615/5641/3605/6369/54209	17		GO:0051446	positive regulation of meiotic cell cycle	4/351	28/18888	0.00168694	0.011735	0.00939862	994/995/10635/993	4
GO:0043320	natural killer cell degranulation	4/469	11/18888	0.000107818	0.00207382	0.00164863	3134/3822/100431172/5873	4		GO:0045911	positive regulation of DNA recombination	6/351	69/18888	0.00176772	0.0122588	0.0098181	79915/2187/7468/10635/8914/4436	6
GO:0070498	interleukin-1-mediated signaling pathway	6/469	32/18888	0.000118836	0.00227487	0.00180846	3656/3553/4792/9705/4615/11213	6		GO:1902807	negative regulation of cell cycle G1/S phase transition	7/351	94/18888	0.00185038	0.0127922	0.0102454	11200/1017/51512/2146/144455/5933/1032	7
GO:0002820	negative regulation of adaptive immune response	8/469	61/18888	0.0001264	0.00240819	0.00191444	3134/64127/3566/3135/5777/90865/339390/1380	8		GO:0006287	base-excision repair, gap-filling	3/351	14/18888	0.00198898	0.0134997	0.010812	2237/5426/5111	3
GO:0002701	negative regulation of production of molecular mediator of immune response	7/469	46/18888	0.000128846	0.00244321	0.00194229	3134/64127/933/90865/7124/11213/54	7		GO:0009263	deoxyribonucleotide biosynthetic process	3/351	14/18888	0.00198898	0.0134997	0.010812	6241/7298/6240	3
GO:0043269	regulation of monoatomic ion transport	26/469	470/18888	0.000130008	0.00245367	0.0019506	10008/5371/2534/1318/274/3792/154/7114/5777/4067/5533/2048/7439/53822/486/126306/5243/80024/219527/3753/567/2771/11027/7852/4318/54209	26		GO:0009265	2'-deoxyribonucleotide biosynthetic process	3/351	14/18888	0.00198898	0.0134997	0.010812	6241/7298/6240	3
GO:0002716	negative regulation of natural killer cell mediated immunity	5/469	21/18888	0.00013529	0.00254144	0.00202037	3134/3106/3135/3105/3133	5		GO:0046385	deoxyribose phosphate biosynthetic process	3/351	14/18888	0.00198898	0.0134997	0.010812	6241/7298/6240	3
GO:0038061	non-canonical NF-kappaB signal transduction	12/469	135/18888	0.000139735	0.00261273	0.00207705	10333/64127/7097/9111/3553/9020/10392/1540/7124/4792/222487/54209	12		GO:0051177	meiotic sister chromatid cohesion	3/351	14/18888	0.00198898	0.0134997	0.010812	699/151246/701	3
GO:0016485	protein processing	17/469	245/18888	0.000142078	0.00262269	0.00208496	4224/837/3428/22900/8728/3792/120892/9935/922/1512/1514/715/1522/50846/9427/1368/5641	17		GO:0085020	protein K6-linked ubiquitination	3/351	14/18888	0.00198898	0.0134997	0.010812	29089/580/27338	3
GO:0034368	protein-lipid complex remodeling	6/469	33/18888	0.000142225	0.00262269	0.00208496	4353/344/5320/348/3990/1071	6		GO:0031571	mitotic G1 DNA damage checkpoint signaling	4/351	30/18888	0.00219297	0.0147943	0.0118488	11200/1017/51512/144455	4
GO:0034369	plasma lipoprotein particle remodeling	6/469	33/18888	0.000142225	0.00262269	0.00208496	4353/344/5320/348/3990/1071	6		GO:0044819	mitotic G1/S transition checkpoint signaling	4/351	30/18888	0.00219297	0.0147943	0.0118488	11200/1017/51512/144455	4
GO:0034370	triglyceride-rich lipoprotein particle remodeling	4/469	12/18888	0.000158559	0.00285699	0.00227123	344/348/3990/1071	4		GO:0001325	formation of extrachromosomal circular DNA	3/351	15/18888	0.00245221	0.0162486	0.0130136	1763/641/9156	3
GO:0034372	very-low-density lipoprotein particle remodeling	4/469	12/18888	0.000158559	0.00285699	0.00227123	344/348/3990/1071	4		GO:0006978	DNA damage response, signal transduction by p53 class mediator resulting in transcription of p21 class mediator	3/351	15/18888	0.00245221	0.0162486	0.0130136	675/11200/2305	3
GO:2001267	regulation of cysteine-type endopeptidase activity involved in apoptotic signaling pathway	4/469	12/18888	0.000158559	0.00285699	0.00227123	3717/355/9705/4318	4		GO:0048308	organelle inheritance	3/351	15/18888	0.00245221	0.0162486	0.0130136	5347/7443/983	3
GO:0032615	interleukin-12 production	8/469	63/18888	0.000159195	0.00285699	0.00227123	64127/7097/3106/3135/3605/11213/3663/54	8		GO:0048313	Golgi inheritance	3/351	15/18888	0.00245221	0.0162486	0.0130136	5347/7443/983	3
GO:0032655	regulation of interleukin-12 production	8/469	63/18888	0.000159195	0.00285699	0.00227123	64127/7097/3106/3135/3605/11213/3663/54	8		GO:0090656	t-circle formation	3/351	15/18888	0.00245221	0.0162486	0.0130136	1763/641/9156	3
GO:0032757	positive regulation of interleukin-8 production	8/469	63/18888	0.000159195	0.00285699	0.00227123	64127/7097/3553/10392/7096/7124/4615/11027	8		GO:0090737	telomere maintenance via telomere trimming	3/351	15/18888	0.00245221	0.0162486	0.0130136	1763/641/9156	3
GO:0006576	biogenic amine metabolic process	10/469	98/18888	0.000161073	0.00287783	0.0022878	26002/6999/217/1621/8942/6581/23498/26/27284/2643	10		GO:0006206	pyrimidine nucleobase metabolic process	3/351	16/18888	0.00297684	0.0196085	0.0157046	1503/7298/6240	3
GO:0031295	T cell costimulation	7/469	48/18888	0.00016983	0.00302086	0.0024015	2534/1326/6366/5777/4067/11148/115650	7		GO:0042772	DNA damage response, signal transduction resulting in transcription	3/351	16/18888	0.00297684	0.0196085	0.0157046	675/11200/2305	3
GO:0060326	cell chemotaxis	20/469	322/18888	0.000172112	0.00304798	0.00242306	6283/6356/10803/64127/3579/6366/7114/414062/3553/1800/4067/80024/6368/9023/6370/683/1232/5641/7852/6369	20		GO:1903322	positive regulation of protein modification by small protein conjugation or removal	8/351	130/18888	0.00299491	0.0196695	0.0157534	54838/5347/991/55215/11065/6502/10055/27338	8
GO:0048247	lymphocyte chemotaxis	8/469	64/18888	0.000178045	0.00313922	0.00249559	6356/6366/414062/80024/6368/9023/6370/6369	8		GO:0051028	mRNA transport	8/351	131/18888	0.00313943	0.0204981	0.016417	7884/54888/3181/55706/6426/10212/7514/8570	8
GO:0003018	vascular process in circulatory system	18/469	275/18888	0.000189696	0.00333004	0.00264729	3363/10396/3792/6515/3579/1621/257313/154/5795/92745/5243/10800/6581/7124/2837/348/3274/2643	18		GO:1901875	positive regulation of post-translational protein modification	8/351	131/18888	0.00313943	0.0204981	0.016417	54838/5347/991/55215/11065/6502/10055/27338	8
GO:0031294	lymphocyte costimulation	7/469	49/18888	0.00019395	0.00336068	0.00267165	2534/1326/6366/5777/4067/11148/115650	7		GO:0006278	RNA-templated DNA biosynthetic process	6/351	78/18888	0.00329612	0.0214584	0.0171861	4751/1736/10721/22948/80119/9212	6
GO:0036230	granulocyte activation	7/469	49/18888	0.00019395	0.00336068	0.00267165	1776/3579/2205/5320/7124/4615/11027	7		GO:0007140	male meiotic nuclear division	5/351	55/18888	0.00350095	0.02253	0.0180444	675/2175/63979/9319/81930	5
GO:0042269	regulation of natural killer cell mediated cytotoxicity	7/469	49/18888	0.00019395	0.00336068	0.00267165	3134/3106/3823/3135/3105/3822/3133	7		GO:0032210	regulation of telomere maintenance via telomerase	5/351	55/18888	0.00350095	0.02253	0.0180444	4751/1736/22948/80119/9212	5
GO:0061081	positive regulation of myeloid leukocyte cytokine production involved in immune response	6/469	35/18888	0.000199865	0.0034467	0.00274003	64127/3135/10392/8013/8482/4615	6		GO:0009112	nucleobase metabolic process	4/351	34/18888	0.00350108	0.02253	0.0180444	1503/7298/8833/6240	4
GO:0071346	cellular response to type II interferon	11/469	120/18888	0.000200629	0.0034467	0.00274003	6356/3717/163351/7097/6366/414062/6368/84166/6370/7124/6369	11		GO:0042558	pteridine-containing compound metabolic process	4/351	34/18888	0.00350108	0.02253	0.0180444	1719/10797/7298/8836	4
GO:0051896	regulation of phosphatidylinositol 3-kinase/protein kinase B signal transduction	17/469	253/18888	0.000208503	0.00356673	0.00283545	4058/51384/2322/3717/113791/6366/3135/5795/5777/2688/799/4914/7124/10019/5008/54209/6403	17		GO:0007063	regulation of sister chromatid cohesion	3/351	17/18888	0.00356537	0.0228778	0.018323	2237/9700/699	3
GO:0034367	protein-containing complex remodeling	6/469	36/18888	0.00023486	0.00400057	0.00318035	4353/344/5320/348/3990/1071	6		GO:0008340	determination of adult lifespan	4/351	35/18888	0.00389579	0.0248551	0.0199066	8438/25788/2956/4436	4
GO:0034762	regulation of transmembrane transport	26/469	489/18888	0.000242507	0.00411341	0.00327005	10008/5371/2534/1318/274/3792/154/7114/3553/5777/4067/5533/10368/2048/53822/486/126306/5243/2688/219527/1393/8013/7124/3753/4318/54209	26		GO:0032212	positive regulation of telomere maintenance via telomerase	4/351	35/18888	0.00389579	0.0248551	0.0199066	4751/1736/22948/9212	4
GO:0002922	positive regulation of humoral immune response	5/469	24/18888	0.000265744	0.00445121	0.00353859	64127/3553/7124/3605/54209	5		GO:0006913	nucleocytoplasmic transport	14/351	333/18888	0.0039669	0.025165	0.0201548	5901/54888/3181/23649/55706/11260/10212/3838/7514/1894/10411/983/580/1408	14
GO:0060252	positive regulation of glial cell proliferation	5/469	24/18888	0.000265744	0.00445121	0.00353859	5583/3553/4067/10800/7124	5		GO:0051169	nuclear transport	14/351	333/18888	0.0039669	0.025165	0.0201548	5901/54888/3181/23649/55706/11260/10212/3838/7514/1894/10411/983/580/1408	14
GO:0060907	positive regulation of macrophage cytokine production	5/469	24/18888	0.000265744	0.00445121	0.00353859	64127/3135/10392/8482/4615	5		GO:0031396	regulation of protein ubiquitination	10/351	198/18888	0.00403205	0.0255058	0.0204278	54838/5347/991/4085/55215/11065/6502/27085/26271/27338	10
GO:0045576	mast cell activation	8/469	68/18888	0.000272725	0.00454919	0.00361648	6283/3566/5777/4067/64109/2205/8013/26762	8		GO:0031398	positive regulation of protein ubiquitination	7/351	108/18888	0.00404638	0.0255242	0.0204425	54838/5347/991/55215/11065/6502/27338	7
GO:0070670	response to interleukin-4	6/469	37/18888	0.000274501	0.00455989	0.00362498	5371/6356/11009/81501/3566/6932	6		GO:0007281	germ cell development	15/351	371/18888	0.00418585	0.0263296	0.0210875	3148/5901/675/994/83990/54888/2189/145508/259266/57082/9319/6790/2176/4436/26271	15
GO:0019724	B cell mediated immunity	15/469	212/18888	0.000280022	0.00463246	0.00368268	64127/3543/3566/9214/3135/5777/2205/715/970/2215/3133/7124/4615/1380/54209	15		GO:0070200	establishment of protein localization to telomere	3/351	18/18888	0.00422007	0.0264703	0.0212002	675/1736/22948	3
GO:0010952	positive regulation of peptidase activity	13/469	167/18888	0.000281558	0.00463878	0.0036877	3428/2534/3717/22900/4067/355/1512/1285/1514/10392/7124/9705/5641	13		GO:0031099	regeneration	10/351	200/18888	0.00432682	0.0270639	0.0216756	87178/1719/6426/890/2146/6790/7298/983/5111/8140	10
GO:0030838	positive regulation of actin filament polymerization	7/469	52/18888	0.000283339	0.00464908	0.00369589	6356/274/6366/146206/9873/10109/6369	7		GO:0072332	intrinsic apoptotic signaling pathway by p53 class mediator	6/351	83/18888	0.00448471	0.0279731	0.0224038	675/79915/11200/1870/4436/1869	6
GO:1903305	regulation of regulated secretory pathway	11/469	125/18888	0.000286946	0.00468912	0.00372772	7476/3134/120892/3566/23208/4067/9899/3822/2771/8447/5873	11		GO:1902117	positive regulation of organelle assembly	6/351	84/18888	0.00475596	0.0295823	0.0236927	29899/55835/10733/10615/163786/6491	6
GO:0050852	T cell receptor signaling pathway	12/469	146/18888	0.000291163	0.00473877	0.00376719	2534/7006/23149/5795/5777/696/100/11148/1540/3105/3988/79908	12		GO:0046822	regulation of nucleocytoplasmic transport	7/351	112/18888	0.00493835	0.0304357	0.0243761	5901/54888/7514/1894/10411/983/580	7
GO:0045862	positive regulation of proteolysis	20/469	336/18888	0.000300845	0.00487661	0.00387677	3428/2534/3717/22900/120892/9709/51667/3553/4067/355/1512/1285/1514/10392/90865/7124/9705/348/5641/54209	20		GO:0006977	DNA damage response, signal transduction by p53 class mediator resulting in cell cycle arrest	3/351	19/18888	0.00494303	0.0304357	0.0243761	11200/51512/144455	3
GO:0007249	canonical NF-kappaB signal transduction	19/469	311/18888	0.000305978	0.00493988	0.00392707	6283/10333/64127/22900/7097/6366/3656/7114/3553/113277/6737/9020/10392/7124/4792/3162/4615/8837/54209	19		GO:0046653	tetrahydrofolate metabolic process	3/351	19/18888	0.00494303	0.0304357	0.0243761	1719/10797/7298	3
GO:0002715	regulation of natural killer cell mediated immunity	7/469	53/18888	0.000319571	0.00511823	0.00406885	3134/3106/3823/3135/3105/3822/3133	7		GO:0071695	anatomical structure maturation	12/351	271/18888	0.00494768	0.0304357	0.0243761	675/23306/994/54888/81624/59277/9319/6790/7298/132320/9928/26271	12
GO:0071825	protein-lipid complex organization	7/469	53/18888	0.000319571	0.00511823	0.00406885	4353/274/344/5320/348/3990/1071	7		GO:2000134	negative regulation of G1/S transition of mitotic cell cycle	6/351	85/18888	0.00503909	0.0309129	0.0247583	11200/1017/51512/2146/144455/5933	6
GO:0051897	positive regulation of phosphatidylinositol 3-kinase/protein kinase B signal transduction	13/469	171/18888	0.000354325	0.00565232	0.00449344	4058/51384/2322/3717/6366/5795/5777/2688/799/7124/5008/54209/6403	13		GO:0048599	oocyte development	5/351	61/18888	0.00547077	0.0334691	0.0268056	675/994/9319/6790/26271	5
GO:0010959	regulation of metal ion transport	22/469	394/18888	0.00037151	0.00590304	0.00469276	10008/5371/2534/1318/274/3792/154/5777/4067/5533/7439/53822/486/126306/80024/219527/3753/567/2771/11027/7852/54209	22		GO:1903320	regulation of protein modification by small protein conjugation or removal	11/351	241/18888	0.00560303	0.0341846	0.0273786	54838/5347/991/4085/55215/11065/6502/27085/26271/10055/27338	11
GO:0001911	negative regulation of leukocyte mediated cytotoxicity	5/469	26/18888	0.000394785	0.00624817	0.00496713	3134/3106/3135/3105/3133	5		GO:0002312	B cell activation involved in immune response	6/351	87/18888	0.00564217	0.0343296	0.0274948	79915/9156/7468/2956/4436/7374	6
GO:2001233	regulation of apoptotic signaling pathway	22/469	396/18888	0.000398011	0.00627452	0.00498807	51384/10333/5371/2534/3717/120892/9709/1621/3553/355/1512/79370/1514/1540/7124/3162/3383/1437/2771/8837/4318/54209	22		GO:0034504	protein localization to nucleus	13/351	311/18888	0.00566755	0.0343903	0.0275434	5901/1736/22948/23649/84823/5347/3838/7514/1894/983/4001/580/1408	13
GO:0050864	regulation of B cell activation	11/469	130/18888	0.000402655	0.00632295	0.00502657	64127/5777/4067/2048/100/933/1540/115650/683/7293/30011	11		GO:0031111	negative regulation of microtubule polymerization or depolymerization	4/351	39/18888	0.00577465	0.0348508	0.0279122	22974/81624/3925/26586	4
GO:0050966	detection of mechanical stimulus involved in sensory perception of pain	4/469	15/18888	0.000412085	0.00644585	0.00512427	2534/4914/7124/7852	4		GO:0071312	cellular response to alkaloid	4/351	39/18888	0.00577465	0.0348508	0.0279122	1111/641/890/5888	4
GO:1903706	regulation of hemopoiesis	23/469	424/18888	0.000413846	0.0064483	0.00512622	81501/3106/3566/9935/3135/5777/4067/100/9290/1540/246778/9308/7124/440712/4792/339390/2113/567/9398/3605/864/54209/6932	23		GO:2000243	positive regulation of reproductive process	6/351	89/18888	0.00629635	0.0378969	0.0303518	994/995/57082/6790/10635/993	6
GO:0097006	regulation of plasma lipoprotein particle levels	9/469	91/18888	0.000429782	0.00667075	0.00530306	4353/344/5320/3988/348/3162/3990/1071/54209	9		GO:1901873	regulation of post-translational protein modification	11/351	246/18888	0.0065069	0.0390589	0.0312824	54838/5347/991/4085/55215/11065/6502/27085/26271/10055/27338	11
GO:0002455	humoral immune response mediated by circulating immunoglobulin	7/469	56/18888	0.000451052	0.00697395	0.0055441	64127/9214/5777/715/7124/1380/54209	7		GO:0000729	DNA double-strand break processing	3/351	21/18888	0.00660111	0.0395182	0.0316503	83990/1763/641	3
GO:0050890	cognition	19/469	322/18888	0.000470574	0.00722851	0.00574647	64220/2534/6356/7097/10396/1621/23208/6547/54207/2048/1393/4914/4125/7124/348/567/5641/151556/54209	19		GO:0009394	2'-deoxyribonucleotide metabolic process	4/351	41/18888	0.00690693	0.0411285	0.03294	6241/7298/6240/7374	4
GO:0006887	exocytosis	20/469	348/18888	0.00047156	0.00722851	0.00574647	7476/3134/120892/94120/3566/91828/23208/4067/115827/51762/1393/2205/8013/9899/3822/2771/100431172/8447/5873/7127	20		GO:0032781	positive regulation of ATP-dependent activity	4/351	41/18888	0.00690693	0.0411285	0.03294	29128/2956/23234/4436	4
GO:0042832	defense response to protozoan	5/469	27/18888	0.000474708	0.00722851	0.00574647	163351/3566/116071/4615/283234	5		GO:0097193	intrinsic apoptotic signaling pathway	13/351	319/18888	0.00696098	0.0413401	0.0331095	675/79915/11200/220042/3070/63979/1870/9833/2956/219790/4436/1032/1869	13
GO:0048245	eosinophil chemotaxis	5/469	27/18888	0.000474708	0.00722851	0.00574647	6356/414062/6368/6370/6369	5		GO:0009994	oocyte differentiation	5/351	65/18888	0.00715354	0.0423709	0.0339351	675/994/9319/6790/26271	5
GO:0014013	regulation of gliogenesis	10/469	112/18888	0.000478458	0.00725811	0.00577	7097/274/5583/3553/4067/10800/90865/7124/7852/54209	10		GO:0009124	nucleoside monophosphate biosynthetic process	4/351	42/18888	0.00752431	0.0440992	0.0353193	7084/7083/7298/8833	4
GO:1904994	regulation of leukocyte adhesion to vascular endothelial cell	6/469	41/18888	0.000488255	0.00736237	0.00585289	6366/6401/6370/7124/2113/6403	6		GO:0009262	deoxyribonucleotide metabolic process	4/351	42/18888	0.00752431	0.0440992	0.0353193	6241/7298/6240/7374	4
GO:0034765	regulation of monoatomic ion transmembrane transport	20/469	349/18888	0.000488994	0.00736237	0.00585289	10008/5371/2534/1318/274/3792/154/7114/5777/4067/5533/2048/53822/486/126306/5243/219527/3753/4318/54209	20		GO:0019692	deoxyribose phosphate metabolic process	4/351	42/18888	0.00752431	0.0440992	0.0353193	6241/7298/6240/7374	4
GO:1901653	cellular response to peptide	21/469	376/18888	0.000499901	0.00749463	0.00595803	837/10333/2534/3717/64127/154/3553/4067/2048/2688/1393/10392/8013/7124/5791/3383/2771/5641/5305/8837/54209	21		GO:0030866	cortical actin cytoskeleton organization	4/351	42/18888	0.00752431	0.0440992	0.0353193	29127/54443/1894/128239	4
GO:0030183	B cell differentiation	12/469	155/18888	0.000502393	0.00749463	0.00595803	2322/29760/5795/5777/100/1540/4914/9452/4066/1380/222487/3087	12		GO:0051495	positive regulation of cytoskeleton organization	9/351	184/18888	0.00762614	0.044579	0.0357035	29899/84722/55835/10733/10411/10615/163786/9793/6491	9
GO:0031663	lipopolysaccharide-mediated signaling pathway	7/469	57/18888	0.000503371	0.00749463	0.00595803	22900/7097/3656/4067/4792/4615/11027	7		GO:0006405	RNA export from nucleus	6/351	93/18888	0.00776754	0.045287	0.0362706	5901/54888/3181/11260/10212/7514	6
GO:0050728	negative regulation of inflammatory response	14/469	201/18888	0.000518364	0.00768939	0.00611285	2534/64127/50616/23208/7114/5777/4067/100/90865/1540/348/3605/54/54209	14		GO:0007548	sex differentiation	12/351	288/18888	0.00789774	0.0459262	0.0367825	3148/675/9125/83990/2189/2175/259266/2491/6240/81930/4436/84733	12
GO:0043405	regulation of MAP kinase activity	11/469	134/18888	0.000521345	0.00770518	0.00612541	6283/10333/2322/120892/5795/3553/4067/2688/7124/348/11213	11		GO:1900182	positive regulation of protein localization to nucleus	6/351	94/18888	0.00817099	0.0473917	0.0379563	5901/1736/22948/5347/1894/983	6
GO:0045055	regulated exocytosis	15/469	225/18888	0.000526015	0.00774571	0.00615763	7476/3134/120892/3566/23208/4067/1393/2205/8013/9899/3822/2771/100431172/8447/5873	15		GO:0009162	deoxyribonucleoside monophosphate metabolic process	3/351	23/18888	0.00855269	0.0494771	0.0396264	7084/7083/7298	3
GO:0019915	lipid storage	9/469	94/18888	0.000546391	0.00801639	0.00637281	8605/134429/3553/10577/3988/7124/4792/348/54209	9
GO:0002691	regulation of cellular extravasation	6/469	42/18888	0.000557841	0.00809574	0.00643589	6366/6401/6370/683/3383/6403	6		LumA-ceRM7
GO:0042119	neutrophil activation	6/469	42/18888	0.000557841	0.00809574	0.00643589	1776/3579/5320/7124/4615/11027	6		ID	Description	GeneRatio	BgRatio	pvalue	p.adjust	qvalue	geneID	Count
GO:0050691	regulation of defense response to virus by host	6/469	42/18888	0.000557841	0.00809574	0.00643589	340061/200316/3553/246778/4321/4277	6		GO:0030198	extracellular matrix organization	40/290	332/18888	2.81521e-24	3.92491e-21	3.0483e-21	284217/4921/7837/1307/2331/55959/80781/4323/2295/4017/7092/1291/7040/4016/5156/11117/140766/50509/170690/4314/649/2192/9719/3908/1803/4327/11173/1805/25903/3912/92949/4239/8516/23187/23768/79625/30008/3037/4325/1305	40
GO:0031638	zymogen activation	7/469	58/18888	0.000560411	0.00810378	0.00644228	3428/922/1512/1514/715/1522/5641	7		GO:0043062	extracellular structure organization	40/290	333/18888	3.15761e-24	3.92491e-21	3.0483e-21	284217/4921/7837/1307/2331/55959/80781/4323/2295/4017/7092/1291/7040/4016/5156/11117/140766/50509/170690/4314/649/2192/9719/3908/1803/4327/11173/1805/25903/3912/92949/4239/8516/23187/23768/79625/30008/3037/4325/1305	40
GO:0090594	inflammatory response to wounding	5/469	28/18888	0.000566223	0.00815848	0.00648577	5777/90865/7124/3162/3605	5		GO:0045229	external encapsulating structure organization	40/290	334/18888	3.54021e-24	3.92491e-21	3.0483e-21	284217/4921/7837/1307/2331/55959/80781/4323/2295/4017/7092/1291/7040/4016/5156/11117/140766/50509/170690/4314/649/2192/9719/3908/1803/4327/11173/1805/25903/3912/92949/4239/8516/23187/23768/79625/30008/3037/4325/1305	40
GO:1902105	regulation of leukocyte differentiation	19/469	328/18888	0.000589228	0.00844885	0.00671661	81501/3106/3566/9935/3135/5777/4067/100/9290/1540/246778/9308/7124/339390/9398/3605/864/54209/6932	19		GO:0060348	bone development	24/290	215/18888	3.34005e-14	2.77725e-11	2.15697e-11	4921/55959/2121/8642/4323/1291/633/338773/11173/8111/6474/56034/8600/359845/7043/8817/1833/7291/3037/10234/4969/4325/1305/63923	24
GO:0046330	positive regulation of JNK cascade	9/469	95/18888	0.000590579	0.00844885	0.00671661	51384/7476/10371/64127/6366/3553/10392/7124/4615	9		GO:0030199	collagen fibril organization	15/290	66/18888	5.75159e-14	3.82596e-11	2.97145e-11	4921/7837/2331/80781/4017/7092/1291/4016/11117/140766/50509/649/11173/1805/30008	15
GO:0007611	learning or memory	17/469	278/18888	0.000618583	0.0088181	0.00701015	64220/2534/6356/7097/10396/1621/23208/6547/54207/2048/1393/4914/4125/348/567/5641/54209	17		GO:0031589	cell-substrate adhesion	29/290	359/18888	3.05955e-13	1.69601e-10	1.31722e-10	8829/1307/4323/2199/54453/11117/8499/3685/50509/2192/10395/5054/1601/7057/7070/79987/3912/3693/55742/25992/8516/10979/83700/1490/79625/30008/3037/1305/63923	29
GO:0097191	extrinsic apoptotic signaling pathway	15/469	230/18888	0.000660728	0.00935716	0.00743868	10333/5371/3717/1621/3553/355/79370/90865/1540/970/7124/3162/3383/1437/8837	15		GO:0001503	ossification	32/290	446/18888	4.38849e-13	2.08516e-10	1.61945e-10	353500/4921/5587/4330/9902/8642/2736/6591/4323/3481/5745/1291/3082/649/338773/11173/6474/8600/359845/6320/2922/8817/10979/1490/9464/9260/7291/4325/4920/1305/117581/63923	32
GO:0046328	regulation of JNK cascade	11/469	138/18888	0.00066795	0.00935716	0.00743868	51384/7476/10371/64127/6366/3553/10392/1540/7124/4615/29969	11		GO:0001667	ameboidal-type cell migration	32/290	498/18888	8.34035e-12	3.4675e-09	2.69305e-09	4921/8829/5587/79899/6591/7857/4017/7040/100506013/54453/2252/25959/411/9590/7057/1803/8823/9353/8828/392255/1000/8817/147372/223117/9037/7145/9464/7291/3037/3357/5793/85360	32
GO:0052548	regulation of endopeptidase activity	17/469	280/18888	0.000670348	0.00935716	0.00743868	3428/2534/3717/22900/274/5265/1800/4067/355/1285/10392/5696/7124/9705/5641/5698/4318	17		GO:0007160	cell-matrix adhesion	22/290	241/18888	2.32888e-11	8.60649e-09	6.68428e-09	8829/1307/4323/54453/11117/8499/3685/50509/10395/5054/7057/7070/79987/3693/25992/8516/10979/83700/1490/30008/1305/63923	22
GO:0031342	negative regulation of cell killing	5/469	29/18888	0.000670364	0.00935716	0.00743868	3134/3106/3135/3105/3133	5		GO:0051216	cartilage development	20/290	209/18888	8.28856e-11	2.75678e-08	2.14107e-08	353500/579/55959/2121/6591/4017/5745/1291/7040/633/649/11173/6474/359845/392255/8817/1833/1490/9464/4969	20
GO:0035872	nucleotide-binding domain, leucine rich repeat containing receptor signaling pathway	5/469	29/18888	0.000670364	0.00935716	0.00743868	64127/144811/10392/1540/4792	5		GO:0006935	chemotaxis	28/290	466/18888	8.35378e-10	2.52588e-07	1.96174e-07	123920/1902/8829/5587/7857/4681/7040/3084/2252/5156/5919/3685/3082/5054/7057/1803/8823/9353/8828/8600/55742/8817/83700/223117/9037/6387/23768/6586	28
GO:0060142	regulation of syncytium formation by plasma membrane fusion	5/469	29/18888	0.000670364	0.00935716	0.00743868	81501/3566/51177/8837/54209	5		GO:0042330	taxis	28/290	468/18888	9.19683e-10	2.54906e-07	1.97974e-07	123920/1902/8829/5587/7857/4681/7040/3084/2252/5156/5919/3685/3082/5054/7057/1803/8823/9353/8828/8600/55742/8817/83700/223117/9037/6387/23768/6586	28
GO:0014009	glial cell proliferation	7/469	60/18888	0.000689862	0.00954216	0.00758575	5583/3553/4067/10800/90865/7124/54209	7		GO:0032963	collagen metabolic process	14/290	107/18888	1.00228e-09	2.56429e-07	1.99157e-07	4921/5118/9902/4323/1291/7040/11117/2149/140766/4314/4327/4239/7043/4325	14
GO:0043030	regulation of macrophage activation	7/469	60/18888	0.000689862	0.00954216	0.00758575	10333/120892/3566/23208/133396/90865/54209	7		GO:0048762	mesenchymal cell differentiation	21/290	269/18888	1.20839e-09	2.87079e-07	2.22961e-07	8829/147906/6591/2295/4017/7040/3084/3082/1601/8828/359845/7043/1000/10979/23187/223117/9037/9464/7291/3037/3357	21
GO:0036005	response to macrophage colony-stimulating factor	4/469	17/18888	0.000690738	0.00954216	0.00758575	81501/7097/7124/54209	4		GO:0003007	heart morphogenesis	20/290	269/18888	7.00125e-09	1.55241e-06	1.20569e-06	8829/8642/6591/7040/3084/10395/9353/8828/2702/6474/115701/55742/4634/9645/23768/9464/7291/3037/6586/3357	20
GO:0050853	B cell receptor signaling pathway	8/469	78/18888	0.000697272	0.00959943	0.00763128	7006/29760/5583/9214/5777/4067/933/4792	8		GO:1903053	regulation of extracellular matrix organization	11/290	72/18888	1.21826e-08	2.45658e-06	1.90792e-06	284217/4921/1291/7040/11117/3908/1803/3912/23187/30008/3037	11
GO:0009308	amine metabolic process	10/469	118/18888	0.000722316	0.00991028	0.0078784	26002/6999/217/1621/8942/6581/23498/26/27284/2643	10		GO:0060485	mesenchyme development	22/290	336/18888	1.25562e-08	2.45658e-06	1.90792e-06	8829/147906/8642/6591/2295/4017/7040/3084/3082/1601/8828/359845/7043/1000/10979/23187/223117/9037/9464/7291/3037/3357	22
GO:0043299	leukocyte degranulation	8/469	79/18888	0.000759316	0.0103825	0.00825379	3134/3566/4067/2205/8013/3822/100431172/5873	8		GO:0050920	regulation of chemotaxis	18/290	229/18888	1.71119e-08	3.1619e-06	2.45571e-06	1902/8829/5587/7857/4681/7040/5156/5919/5054/7057/1803/8823/9353/8817/83700/223117/9037/6387	18
GO:0002753	cytoplasmic pattern recognition receptor signaling pathway	12/469	163/18888	0.00078661	0.0105971	0.00842443	54941/10333/64127/340061/22900/144811/10392/1540/7124/4792/4615/54209	12		GO:0061448	connective tissue development	20/290	288/18888	2.21616e-08	3.87944e-06	3.01299e-06	353500/579/55959/2121/6591/4017/5745/1291/7040/633/649/11173/6474/359845/392255/8817/1833/1490/9464/4969	20
GO:0001562	response to protozoan	5/469	30/18888	0.000788194	0.0105971	0.00842443	163351/3566/116071/4615/283234	5		GO:0050919	negative chemotaxis	9/290	47/18888	3.42365e-08	5.69354e-06	4.42192e-06	3084/3685/1803/9353/8828/223117/9037/23768/6586	9
GO:0002438	acute inflammatory response to antigenic stimulus	5/469	30/18888	0.000788194	0.0105971	0.00842443	3579/133396/2205/2215/3133	5		GO:0050921	positive regulation of chemotaxis	14/290	142/18888	4.08843e-08	6.20085e-06	4.81593e-06	1902/8829/5587/7857/7040/5156/5919/5054/7057/8823/9353/8817/9037/6387	14
GO:0043032	positive regulation of macrophage activation	5/469	30/18888	0.000788194	0.0105971	0.00842443	10333/120892/3566/90865/54209	5		GO:0007409	axonogenesis	25/290	455/18888	4.10159e-08	6.20085e-06	4.81593e-06	4692/8829/84628/91624/2736/9638/2115/2596/3908/7070/9353/8828/6474/5592/1272/23022/55701/1000/223117/9037/6387/23768/4130/6586/63923	25
GO:1900017	positive regulation of cytokine production involved in inflammatory response	5/469	30/18888	0.000788194	0.0105971	0.00842443	10333/64127/7124/4615/3605	5		GO:0010975	regulation of neuron projection development	25/290	460/18888	5.06975e-08	7.3313e-06	5.6939e-06	7025/4921/1902/8829/84628/5587/9638/8499/411/1601/7070/9353/163404/6474/22891/5376/1272/1000/223117/9037/6387/79625/5793/4920/63923	25
GO:0002534	cytokine production involved in inflammatory response	8/469	80/18888	0.000825724	0.0110279	0.00876691	10333/64127/2048/113/7124/4615/3605/54209	8		GO:0043410	positive regulation of MAPK cascade	25/290	475/18888	9.39876e-08	1.30251e-05	1.0116e-05	1902/8829/3481/7040/100506013/3084/5156/2149/5322/3082/57161/9590/220164/7057/56034/8600/7043/392255/1000/8817/10979/1490/9464/3357/344558	25
GO:1900015	regulation of cytokine production involved in inflammatory response	8/469	80/18888	0.000825724	0.0110279	0.00876691	10333/64127/2048/113/7124/4615/3605/54209	8		GO:0090132	epithelium migration	22/290	378/18888	1.01787e-07	1.31405e-05	1.02056e-05	8829/5587/6591/7857/4017/7040/100506013/54453/2252/25959/411/7057/1803/8823/9353/8828/392255/8817/147372/9037/3037/5793	22
GO:0017157	regulation of exocytosis	13/469	188/18888	0.000868313	0.011553	0.00918429	7476/3134/120892/3566/23208/4067/115827/51762/9899/3822/2771/8447/5873	13		GO:0032330	regulation of chondrocyte differentiation	9/290	53/18888	1.02722e-07	1.31405e-05	1.02056e-05	579/6591/4017/11173/6474/359845/392255/8817/1490	9
GO:1903236	regulation of leukocyte tethering or rolling	4/469	18/18888	0.000870783	0.011553	0.00918429	6366/6401/6370/6403	4		GO:0050673	epithelial cell proliferation	25/290	482/18888	1.24228e-07	1.44928e-05	1.12559e-05	8829/5587/55959/6591/4323/5798/7857/3481/4017/7040/100506013/2252/3082/1601/7057/8828/8600/3339/3912/10468/9037/6387/7291/3037/3357	25
GO:0032088	negative regulation of NF-kappaB transcription factor activity	8/469	81/18888	0.000896716	0.0118346	0.00940821	22900/3656/6737/1540/84166/4792/57413/11213	8		GO:0090130	tissue migration	22/290	383/18888	1.27923e-07	1.44928e-05	1.12559e-05	8829/5587/6591/7857/4017/7040/100506013/54453/2252/25959/411/7057/1803/8823/9353/8828/392255/8817/147372/9037/3037/5793	22
GO:0006909	phagocytosis	15/469	237/18888	0.000897901	0.0118346	0.00940821	2534/64127/7097/23208/1053/5795/4067/56990/54734/114786/4615/8685/5873/26762/54209	15		GO:1903522	regulation of blood circulation	18/290	262/18888	1.33907e-07	1.44928e-05	1.12559e-05	6327/781/9096/3269/27129/100506013/27345/2149/3751/8913/2702/3768/6474/84525/79987/4634/775/5350	18
GO:0060759	regulation of response to cytokine stimulus	13/469	189/18888	0.000911917	0.0119801	0.00952384	837/340061/22900/7097/3656/5777/1540/84166/10019/11213/7852/4321/54209	13		GO:0007411	axon guidance	17/290	234/18888	1.35306e-07	1.44928e-05	1.12559e-05	8829/91624/2736/9638/2115/2596/3908/9353/8828/1272/23022/55701/223117/9037/6387/23768/6586	17
GO:0010721	negative regulation of cell development	17/469	288/18888	0.00091624	0.0119977	0.00953782	7476/10371/6356/3566/9935/3135/3553/4067/2048/9290/7124/339390/8482/567/393/864/54209	17		GO:0097485	neuron projection guidance	17/290	234/18888	1.35306e-07	1.44928e-05	1.12559e-05	8829/91624/2736/9638/2115/2596/3908/9353/8828/1272/23022/55701/223117/9037/6387/23768/6586	17
GO:0072677	eosinophil migration	5/469	31/18888	0.000920808	0.0120183	0.00955425	6356/414062/6368/6370/6369	5		GO:0007229	integrin-mediated signaling pathway	12/290	111/18888	1.39438e-07	1.44928e-05	1.12559e-05	284217/8829/1307/5587/3685/3908/7070/3912/3693/8516/10979/1490	12
GO:2000116	regulation of cysteine-type endopeptidase activity	13/469	190/18888	0.000957341	0.0124547	0.00990117	3428/2534/3717/22900/1800/355/1285/10392/7124/9705/5641/5698/4318	13		GO:0061035	regulation of cartilage development	10/290	72/18888	1.44413e-07	1.45551e-05	1.13043e-05	579/6591/4017/649/11173/6474/359845/392255/8817/1490	10
GO:0032677	regulation of interleukin-8 production	9/469	102/18888	0.000988722	0.0128215	0.0101927	10333/64127/7097/3553/10392/7096/7124/4615/11027	9		GO:0042692	muscle cell differentiation	23/290	428/18888	2.16727e-07	2.10203e-05	1.63256e-05	284217/9096/5587/84814/4323/3481/2318/1291/7040/57538/3084/5156/338773/3908/6474/115701/84525/5592/3912/8516/1000/30846/30008	23
GO:0050866	negative regulation of cell activation	14/469	215/18888	0.00100328	0.0129684	0.0103095	3566/23208/10457/3135/5777/4067/133396/5320/3133/339390/348/10019/864/54209	14		GO:0002062	chondrocyte differentiation	12/290	116/18888	2.27168e-07	2.10203e-05	1.63256e-05	579/55959/6591/4017/5745/7040/11173/6474/359845/392255/8817/1490	12
GO:0015918	sterol transport	11/469	145/18888	0.00100665	0.0129704	0.0103111	57476/134429/344/10577/3988/4792/348/5305/3990/1071/54209	11		GO:0070371	ERK1 and ERK2 cascade	20/290	332/18888	2.2752e-07	2.10203e-05	1.63256e-05	8829/91662/7040/100506013/3084/5156/11117/3685/2149/5322/2192/9590/1601/56034/8600/8817/10979/1490/9464/3357	20
GO:0030888	regulation of B cell proliferation	7/469	64/18888	0.00101928	0.0130493	0.0103739	4067/2048/100/933/115650/683/7293	7		GO:0010810	regulation of cell-substrate adhesion	16/290	221/18888	3.33256e-07	2.9957e-05	2.32663e-05	8829/1307/4323/2199/54453/11117/2192/10395/5054/1601/7057/7070/10979/79625/30008/3037	16
GO:0034142	toll-like receptor 4 signaling pathway	7/469	64/18888	0.00101928	0.0130493	0.0103739	9111/3656/4067/4792/4615/11027/54209	7		GO:0008038	neuron recognition	8/290	45/18888	3.69242e-07	3.23102e-05	2.50939e-05	4692/8829/91624/4978/2596/23022/9037/63923	8
GO:0032637	interleukin-8 production	9/469	103/18888	0.00106012	0.0135291	0.0107553	10333/64127/7097/3553/10392/7096/7124/4615/11027	9		GO:0010631	epithelial cell migration	21/290	375/18888	3.78863e-07	3.23102e-05	2.50939e-05	8829/5587/6591/7857/4017/7040/54453/2252/25959/411/7057/1803/8823/9353/8828/392255/8817/147372/9037/3037/5793	21
GO:0002281	macrophage activation involved in immune response	4/469	19/18888	0.00108151	0.0137151	0.0109031	9111/90865/7124/54209	4		GO:0014032	neural crest cell development	10/290	80/18888	3.9801e-07	3.30945e-05	2.57031e-05	8829/6591/3084/8828/1000/223117/9037/9464/7291/3357	10
GO:0043011	myeloid dendritic cell differentiation	4/469	19/18888	0.00108151	0.0137151	0.0109031	81501/116071/1437/55509	4		GO:0060326	cell chemotaxis	19/290	322/18888	6.28915e-07	5.10188e-05	3.9624e-05	1902/8829/5587/7857/4681/5156/5919/3082/5054/7057/1803/8823/9353/8600/55742/8817/83700/9037/6387	19
GO:0030225	macrophage differentiation	7/469	65/18888	0.00111831	0.0141371	0.0112386	7097/1053/133396/90865/4615/1437/4318	7		GO:0007435	salivary gland morphogenesis	7/290	34/18888	7.05618e-07	5.46886e-05	4.24742e-05	284217/8829/6591/7040/2252/3082/7043	7
GO:0072676	lymphocyte migration	10/469	125/18888	0.00112777	0.0142121	0.0112982	326/6356/6366/414062/80024/6368/9023/6370/3383/6369	10		GO:0051149	positive regulation of muscle cell differentiation	10/290	85/18888	7.07038e-07	5.46886e-05	4.24742e-05	284217/5587/4323/7040/3084/3908/6474/84525/3912/30008	10
GO:0042100	B cell proliferation	9/469	104/18888	0.00113563	0.0142219	0.011306	4067/2048/100/933/115650/970/683/7293/1380	9		GO:0035272	exocrine system development	8/290	49/18888	7.32502e-07	5.53705e-05	4.30038e-05	284217/8829/6591/3481/7040/2252/3082/7043	8
GO:0042102	positive regulation of T cell proliferation	9/469	104/18888	0.00113563	0.0142219	0.011306	3717/6708/3553/11148/3105/115650/970/3133/283234	9		GO:0048864	stem cell development	10/290	86/18888	7.89342e-07	5.83412e-05	4.5311e-05	8829/6591/3084/8828/1000/223117/9037/9464/7291/3357	10
GO:0046209	nitric oxide metabolic process	8/469	84/18888	0.00113949	0.014226	0.0113092	10333/3717/7097/3553/113277/7124/54/2643	8		GO:0001938	positive regulation of endothelial cell proliferation	11/290	111/18888	1.12325e-06	8.12158e-05	6.30768e-05	8829/5587/7857/3481/100506013/2252/8828/3339/9037/6387/3357	11
GO:0002861	regulation of inflammatory response to antigenic stimulus	6/469	48/18888	0.0011513	0.0143289	0.0113911	2534/64127/4067/3133/7124/54209	6		GO:0007431	salivary gland development	7/290	37/18888	1.29822e-06	9.18695e-05	7.1351e-05	284217/8829/6591/7040/2252/3082/7043	7
GO:0007254	JNK cascade	12/469	171/18888	0.00119427	0.0148177	0.0117797	51384/7476/10371/64127/120892/6366/3553/10392/1540/7124/4615/29969	12		GO:0070372	regulation of ERK1 and ERK2 cascade	18/290	308/18888	1.43181e-06	9.92125e-05	7.7054e-05	8829/91662/7040/100506013/3084/5156/11117/2149/5322/2192/9590/1601/56034/8817/10979/1490/9464/3357	18
GO:1901222	regulation of non-canonical NF-kappaB signal transduction	9/469	105/18888	0.00121543	0.0150339	0.0119515	64127/7097/9111/3553/10392/1540/7124/222487/54209	9		GO:0050679	positive regulation of epithelial cell proliferation	15/290	219/18888	1.56905e-06	0.000100458	7.80212e-05	8829/5587/5798/7857/3481/100506013/2252/8828/3339/3912/9037/6387/7291/3037/3357	15
GO:0048872	homeostasis of number of cells	18/469	322/18888	0.00121987	0.0150426	0.0119584	2322/3717/64127/6708/3579/9935/4067/355/100/5320/1540/3988/440712/2113/3162/567/10019/8837	18		GO:0048846	axon extension involved in axon guidance	7/290	38/18888	1.5706e-06	0.000100458	7.80212e-05	8829/9353/8828/223117/9037/6387/6586	7
GO:1901224	positive regulation of non-canonical NF-kappaB signal transduction	7/469	66/18888	0.00122474	0.0150564	0.0119695	64127/7097/9111/3553/10392/7124/54209	7		GO:0071711	basement membrane organization	7/290	38/18888	1.5706e-06	0.000100458	7.80212e-05	284217/7837/1291/3908/3912/23187/23768	7
GO:2001057	reactive nitrogen species metabolic process	8/469	85/18888	0.00123115	0.0150887	0.0119951	10333/3717/7097/3553/113277/7124/54/2643	8		GO:1902284	neuron projection extension involved in neuron projection guidance	7/290	38/18888	1.5706e-06	0.000100458	7.80212e-05	8829/9353/8828/223117/9037/6387/6586	7
GO:0010743	regulation of macrophage derived foam cell differentiation	5/469	33/18888	0.00123487	0.0150887	0.0119951	5583/5320/4792/1437/1071	5		GO:0014033	neural crest cell differentiation	10/290	93/18888	1.63874e-06	0.000102818	7.98545e-05	8829/6591/3084/8828/1000/223117/9037/9464/7291/3357	10
GO:2000377	regulation of reactive oxygen species metabolic process	11/469	149/18888	0.00125679	0.01531	0.012171	10333/2534/120892/9263/7124/683/2771/5873/8837/54/2643	11		GO:0051147	regulation of muscle cell differentiation	13/290	165/18888	1.66933e-06	0.000102818	7.98545e-05	284217/5587/84814/4323/3481/7040/3084/338773/3908/6474/84525/3912/30008	13
GO:2001056	positive regulation of cysteine-type endopeptidase activity	10/469	127/18888	0.00127277	0.0154578	0.0122886	3428/2534/3717/22900/355/1285/10392/7124/9705/5641	10		GO:0003170	heart valve development	9/290	73/18888	1.72073e-06	0.000104057	8.08168e-05	8642/6591/7040/11117/9353/2702/6474/7291/6586	9
GO:0032412	regulation of monoatomic ion transmembrane transporter activity	14/469	221/18888	0.0013055	0.0158076	0.0125666	10008/154/7114/10368/2048/53822/486/126306/5243/219527/1393/3753/4318/54209	14		GO:0051146	striated muscle cell differentiation	18/290	313/18888	1.80084e-06	0.000106552	8.27545e-05	9096/5587/84814/4323/3481/2318/1291/7040/57538/3084/5156/338773/6474/115701/84525/5592/1000/30846	18
GO:0002755	MyD88-dependent toll-like receptor signaling pathway	4/469	20/18888	0.00132559	0.0159547	0.0126835	10333/3656/4615/11213	4		GO:0085029	extracellular matrix assembly	8/290	55/18888	1.82606e-06	0.000106552	8.27545e-05	7837/1291/7040/11117/4239/23187/30008/3037	8
GO:0043691	reverse cholesterol transport	4/469	20/18888	0.00132559	0.0159547	0.0126835	344/348/3990/1071	4		GO:0030323	respiratory tube development	14/290	197/18888	2.27568e-06	0.000129736	0.00010076	284217/2736/4323/1291/2252/5156/9719/84525/7043/8817/147372/1490/5125/4311	14
GO:0060760	positive regulation of response to cytokine stimulus	7/469	67/18888	0.00133894	0.0160673	0.012773	837/340061/7097/84166/7852/4321/54209	7		GO:0032970	regulation of actin filament-based process	20/290	385/18888	2.30139e-06	0.000129736	0.00010076	1902/8829/50944/5587/122786/5156/25959/10395/9353/2702/7043/10979/83700/775/1490/79822/9037/6387/5350/55243	20
GO:0043491	phosphatidylinositol 3-kinase/protein kinase B signal transduction	17/469	299/18888	0.00137697	0.0164744	0.0130967	4058/51384/2322/3717/113791/6366/3135/5795/5777/2688/799/4914/7124/10019/5008/54209/6403	17		GO:0001649	osteoblast differentiation	16/290	257/18888	2.4617e-06	0.00013646	0.000105983	4921/5587/9902/2736/6591/3481/5745/1291/3082/338773/6474/10979/9464/7291/117581/63923	16
GO:0045765	regulation of angiogenesis	19/469	353/18888	0.00140346	0.0167415	0.0133091	5371/6356/51752/3579/10457/694/3135/3553/1512/1285/10800/22846/7124/2113/3162/1232/3087/7852/6369	19		GO:0055123	digestive system development	12/290	145/18888	2.51376e-06	0.000137062	0.00010645	579/79827/8642/2736/3481/2295/5156/5919/6474/56034/7043/5125	12
GO:0002717	positive regulation of natural killer cell mediated immunity	5/469	34/18888	0.00141863	0.0167732	0.0133342	3134/3823/3135/3822/3133	5		GO:0048705	skeletal system morphogenesis	15/290	229/18888	2.73193e-06	0.000146555	0.000113823	579/4323/5156/649/338773/6474/359845/7043/3224/8817/1490/7291/3037/4325/1305	15
GO:0050901	leukocyte tethering or rolling	5/469	34/18888	0.00141863	0.0167732	0.0133342	6366/6401/6370/7124/6403	5		GO:0001935	endothelial cell proliferation	14/290	202/18888	3.05488e-06	0.000161278	0.000125258	8829/5587/4323/7857/3481/4017/100506013/2252/7057/8828/3339/9037/6387/3357	14
GO:0071353	cellular response to interleukin-4	5/469	34/18888	0.00141863	0.0167732	0.0133342	5371/11009/81501/3566/6932	5		GO:0090497	mesenchymal cell migration	8/290	59/18888	3.15363e-06	0.00016389	0.000127286	8829/8828/1000/223117/9037/9464/7291/3357	8
GO:0071827	plasma lipoprotein particle organization	6/469	50/18888	0.00143	0.016858	0.0134017	4353/344/5320/348/3990/1071	6		GO:0010811	positive regulation of cell-substrate adhesion	11/290	124/18888	3.36537e-06	0.000172203	0.000133743	8829/1307/2199/54453/11117/1601/7070/10979/79625/30008/3037	11
GO:0007188	adenylate cyclase-modulating G protein-coupled receptor signaling pathway	15/469	249/18888	0.00147182	0.0172506	0.0137138	5660/84658/154/5732/799/113/165140/54331/3640/1232/222487/2771/8685/283383/2869	15		GO:0003179	heart valve morphogenesis	8/290	61/18888	4.07832e-06	0.000205523	0.00015962	8642/6591/7040/11117/9353/2702/7291/6586	8
GO:0035296	regulation of tube diameter	11/469	152/18888	0.00147617	0.0172506	0.0137138	3363/3792/1621/257313/154/10800/7124/2837/348/3274/2643	11		GO:0008016	regulation of heart contraction	14/290	208/18888	4.29754e-06	0.000213337	0.00016569	6327/781/9096/27129/100506013/3751/8913/2702/3768/6474/84525/4634/775/5350	14
GO:0097746	blood vessel diameter maintenance	11/469	152/18888	0.00147617	0.0172506	0.0137138	3363/3792/1621/257313/154/10800/7124/2837/348/3274/2643	11		GO:0060537	muscle tissue development	21/290	438/18888	4.50935e-06	0.00022056	0.000171299	9096/3481/1291/7040/57538/3084/5156/8913/2702/1134/6474/115701/84525/5592/8516/4634/5350/30008/7291/9242/63923	21
GO:0010950	positive regulation of endopeptidase activity	11/469	153/18888	0.00155591	0.0180774	0.014371	3428/2534/3717/22900/4067/355/1285/10392/7124/9705/5641	11		GO:0097529	myeloid leukocyte migration	15/290	239/18888	4.61393e-06	0.000222405	0.000172732	7499/4323/7857/4681/11117/5919/5054/7057/1803/9353/8600/83700/6387/4920/4267	15
GO:0035150	regulation of tube size	11/469	153/18888	0.00155591	0.0180774	0.014371	3363/3792/1621/257313/154/10800/7124/2837/348/3274/2643	11		GO:0050678	regulation of epithelial cell proliferation	20/290	407/18888	5.30966e-06	0.000252285	0.000195938	8829/5587/55959/6591/5798/7857/3481/7040/100506013/2252/1601/7057/8828/3339/3912/9037/6387/7291/3037/3357	20
GO:0070339	response to bacterial lipopeptide	3/469	10/18888	0.00160269	0.0182337	0.0144953	10333/7097/7096	3		GO:0070374	positive regulation of ERK1 and ERK2 cascade	14/290	215/18888	6.30024e-06	0.000295135	0.000229219	8829/7040/100506013/3084/5156/2149/5322/9590/56034/8817/10979/1490/9464/3357	14
GO:0071220	cellular response to bacterial lipoprotein	3/469	10/18888	0.00160269	0.0182337	0.0144953	10333/7097/7096	3		GO:0035767	endothelial cell chemotaxis	6/290	31/18888	6.63076e-06	0.000299823	0.000232859	8829/5587/7057/8823/8817/9037	6
GO:0071221	cellular response to bacterial lipopeptide	3/469	10/18888	0.00160269	0.0182337	0.0144953	10333/7097/7096	3		GO:0048565	digestive tract development	11/290	133/18888	6.64678e-06	0.000299823	0.000232859	579/79827/8642/2736/2295/5156/5919/6474/56034/7043/5125	11
GO:2000271	positive regulation of fibroblast apoptotic process	3/469	10/18888	0.00160269	0.0182337	0.0144953	694/9263/9262	3		GO:0001837	epithelial to mesenchymal transition	13/290	187/18888	6.67074e-06	0.000299823	0.000232859	147906/6591/2295/4017/7040/3082/1601/359845/7043/10979/23187/7291/3037	13
GO:0001959	regulation of cytokine-mediated signaling pathway	12/469	177/18888	0.00160364	0.0182337	0.0144953	837/340061/22900/3656/5777/1540/84166/10019/11213/7852/4321/54209	12		GO:1905314	semi-lunar valve development	7/290	47/18888	6.95509e-06	0.000308435	0.000239548	6591/7040/11117/9353/2702/7291/6586	7
GO:0002396	MHC protein complex assembly	4/469	21/18888	0.00160566	0.0182337	0.0144953	55080/3105/567/6892	4		GO:1904018	positive regulation of vasculature development	13/290	190/18888	7.92965e-06	0.000347026	0.00026952	8829/5587/7040/100506013/11117/5054/7057/8817/147372/9037/6387/7291/63923	13
GO:0002501	peptide antigen assembly with MHC protein complex	4/469	21/18888	0.00160566	0.0182337	0.0144953	55080/3105/567/6892	4		GO:0060541	respiratory system development	14/290	220/18888	8.19982e-06	0.000353249	0.000274353	284217/2736/4323/1291/2252/5156/9719/84525/7043/8817/147372/1490/9242/4311	14
GO:0032495	response to muramyl dipeptide	4/469	21/18888	0.00160566	0.0182337	0.0144953	64127/10392/4792/3663	4		GO:0033627	cell adhesion mediated by integrin	9/290	88/18888	8.28424e-06	0.000353249	0.000274353	1307/6591/11117/3685/5054/1803/3693/8516/83700	9
GO:0002719	negative regulation of cytokine production involved in immune response	5/469	35/18888	0.00162175	0.0183646	0.0145994	3134/64127/7124/11213/54	5		GO:0003012	muscle system process	21/290	459/18888	9.23462e-06	0.000388789	0.000301955	6327/781/29995/5587/55959/4620/1291/2149/3751/4619/8913/2702/1134/3768/5592/4634/800/775/5350/9464/3357	21
GO:0030301	cholesterol transport	10/469	132/18888	0.00170263	0.0192264	0.0152844	134429/344/10577/3988/4792/348/5305/3990/1071/54209	10		GO:0030324	lung development	13/290	193/18888	9.39364e-06	0.000390541	0.000303316	284217/2736/4323/1291/2252/5156/9719/84525/7043/8817/147372/1490/4311	13
GO:0045807	positive regulation of endocytosis	11/469	155/18888	0.00172598	0.0193811	0.0154074	64127/274/120892/6366/5795/5533/6401/348/567/5873/54209	11		GO:0048566	embryonic digestive tract development	6/290	33/18888	9.72047e-06	0.000399139	0.000309994	2736/2295/5156/5919/6474/5125	6
GO:0051961	negative regulation of nervous system development	11/469	155/18888	0.00172598	0.0193811	0.0154074	7476/10371/6356/7097/3553/2048/7124/8482/567/393/54209	11		GO:0006936	muscle contraction	18/290	355/18888	1.03496e-05	0.000419788	0.000326031	6327/781/5587/55959/4620/2149/3751/4619/8913/2702/1134/3768/5592/4634/800/775/5350/3357	18
GO:0010543	regulation of platelet activation	6/469	52/18888	0.00175734	0.0196783	0.0156437	3717/7006/4067/348/10019/6403	6		GO:0061572	actin filament bundle organization	12/290	167/18888	1.0814e-05	0.000433341	0.000336557	1902/8829/50944/10395/56776/359845/3693/7043/800/10979/1490/79822	12
GO:0002244	hematopoietic progenitor cell differentiation	10/469	133/18888	0.00180128	0.0201143	0.0159903	2322/6547/256957/5777/4067/4222/3988/10019/115761/5008	10		GO:0003205	cardiac chamber development	12/290	168/18888	1.14886e-05	0.000454895	0.000353297	8829/7040/3084/57167/9353/8828/2702/6474/55742/4634/9464/6586	12
GO:0022898	regulation of transmembrane transporter activity	14/469	229/18888	0.00182375	0.0203088	0.0161449	10008/154/7114/10368/2048/53822/486/126306/5243/219527/1393/3753/4318/54209	14		GO:0007015	actin filament organization	21/290	467/18888	1.19855e-05	0.000468985	0.00036424	1902/8829/50944/57471/25959/10395/9353/56776/359845/3693/8522/7043/800/9645/10979/1490/79822/9037/6387/55243/201191	21
GO:1901342	regulation of vasculature development	19/469	362/18888	0.0018706	0.020773	0.0165139	5371/6356/51752/3579/10457/694/3135/3553/1512/1285/10800/22846/7124/2113/3162/1232/3087/7852/6369	19		GO:0014706	striated muscle tissue development	15/290	265/18888	1.59066e-05	0.00061518	0.000477783	9096/7040/57538/3084/5156/8913/2702/6474/115701/84525/5592/4634/5350/7291/9242	15
GO:2001236	regulation of extrinsic apoptotic signaling pathway	11/469	157/18888	0.00191092	0.0211363	0.0168028	10333/5371/1621/3553/79370/1540/7124/3162/3383/1437/8837	11		GO:0010977	negative regulation of neuron projection development	11/290	146/18888	1.61644e-05	0.000617961	0.000479943	7025/1902/8829/1601/7070/9353/22891/5376/223117/9037/5793	11
GO:0009713	catechol-containing compound biosynthetic process	4/469	22/18888	0.00192435	0.0211363	0.0168028	26002/217/1621/2643	4		GO:0110011	regulation of basement membrane organization	4/290	11/18888	1.64996e-05	0.000623608	0.000484329	284217/3908/3912/23187	4
GO:0030449	regulation of complement activation	4/469	22/18888	0.00192435	0.0211363	0.0168028	3553/922/1380/54209	4		GO:0060445	branching involved in salivary gland morphogenesis	5/290	22/18888	1.75206e-05	0.000654758	0.000508522	284217/8829/6591/2252/3082	5
GO:0042423	catecholamine biosynthetic process	4/469	22/18888	0.00192435	0.0211363	0.0168028	26002/217/1621/2643	4		GO:0001763	morphogenesis of a branching structure	13/290	206/18888	1.88568e-05	0.000696865	0.000541224	284217/8829/8642/2736/6591/4323/57471/2252/170690/3082/9353/6474/1305	13
GO:1904062	regulation of monoatomic cation transmembrane transport	17/469	309/18888	0.00195286	0.021391	0.0170053	10008/5371/2534/1318/274/3792/7114/5777/4067/5533/53822/486/126306/219527/3753/4318/54209	17		GO:0003161	cardiac conduction system development	6/290	37/18888	1.93781e-05	0.00070203	0.000545235	9096/8913/2702/6474/84525/9242	6
GO:0015850	organic hydroxy compound transport	17/469	311/18888	0.00208947	0.0228252	0.0181454	64220/57476/134429/23208/344/3737/10577/6581/8973/3988/4792/348/5305/3990/133418/1071/54209	17		GO:0010634	positive regulation of epithelial cell migration	12/290	177/18888	1.94187e-05	0.00070203	0.000545235	8829/5587/7040/54453/2252/7057/8823/8828/8817/147372/9037/3037	12
GO:0032092	positive regulation of protein binding	6/469	54/18888	0.00213857	0.0232522	0.0184849	340061/120892/6737/348/567/4318	6		GO:0090287	regulation of cellular response to growth factor stimulus	18/290	373/18888	2.01103e-05	0.000719214	0.000558582	8829/55959/4681/5654/7040/11117/64388/8483/9719/7057/8823/9353/10468/23090/7043/8516/8817/147372	18
GO:0016064	immunoglobulin mediated immune response	13/469	208/18888	0.00215986	0.0232522	0.0184849	64127/3543/3566/9214/5777/2205/715/2215/3133/7124/4615/1380/54209	13		GO:0060349	bone morphogenesis	9/290	99/18888	2.16664e-05	0.000766623	0.000595402	4323/338773/6474/7043/8817/7291/3037/4325/1305	9
GO:0002604	regulation of dendritic cell antigen processing and presentation	3/469	11/18888	0.00216327	0.0232522	0.0184849	64127/6366/10392	3		GO:0003180	aortic valve morphogenesis	6/290	38/18888	2.2717e-05	0.000795333	0.0006177	6591/7040/11117/9353/7291/6586	6
GO:0006568	tryptophan metabolic process	3/469	11/18888	0.00216327	0.0232522	0.0184849	6999/8942/23498	3		GO:0001952	regulation of cell-matrix adhesion	10/290	125/18888	2.33778e-05	0.000809945	0.000629048	8829/1307/4323/54453/10395/5054/7057/7070/10979/30008	10
GO:0008063	Toll signaling pathway	3/469	11/18888	0.00216327	0.0232522	0.0184849	3656/4615/11213	3		GO:0001936	regulation of endothelial cell proliferation	12/290	181/18888	2.42569e-05	0.000831738	0.000645974	8829/5587/7857/3481/100506013/2252/7057/8828/3339/9037/6387/3357	12
GO:0032493	response to bacterial lipoprotein	3/469	11/18888	0.00216327	0.0232522	0.0184849	10333/7097/7096	3		GO:0034446	substrate adhesion-dependent cell spreading	9/290	101/18888	2.54493e-05	0.000861694	0.00066924	8829/3685/2192/1601/3912/55742/8516/10979/3037	9
GO:0046635	positive regulation of alpha-beta T cell activation	7/469	73/18888	0.00220938	0.0236845	0.0188285	3717/3566/100/3105/9308/3133/864	7		GO:0001755	neural crest cell migration	7/290	57/18888	2.56487e-05	0.000861694	0.00066924	8829/8828/223117/9037/9464/7291/3357	7
GO:0043122	regulation of canonical NF-kappaB signal transduction	16/469	286/18888	0.00221641	0.0236967	0.0188382	6283/10333/64127/22900/6366/7114/3553/113277/6737/10392/7124/4792/3162/4615/8837/54209	16		GO:0003206	cardiac chamber morphogenesis	10/290	127/18888	2.6832e-05	0.000890681	0.000691753	8829/7040/3084/9353/8828/6474/55742/4634/9464/6586	10
GO:0002223	stimulatory C-type lectin receptor signaling pathway	4/469	23/18888	0.00228427	0.0241637	0.0192095	2534/3823/4067/3822	4		GO:0001764	neuron migration	12/290	183/18888	2.70471e-05	0.000890681	0.000691753	4692/8829/84628/815/8828/5592/266727/6387/23768/79625/7291/63923	12
GO:0006925	inflammatory cell apoptotic process	4/469	23/18888	0.00228427	0.0241637	0.0192095	64127/3579/6480/1514	4		GO:2001026	regulation of endothelial cell chemotaxis	5/290	24/18888	2.7576e-05	0.000899193	0.000698364	5587/7057/8823/8817/9037	5
GO:1990840	response to lectin	4/469	23/18888	0.00228427	0.0241637	0.0192095	2534/3823/4067/3822	4		GO:0008037	cell recognition	11/290	155/18888	2.82773e-05	0.00091311	0.000709172	4692/8829/91624/4978/5322/2596/81035/10417/23022/9037/63923	11
GO:1990858	cellular response to lectin	4/469	23/18888	0.00228427	0.0241637	0.0192095	2534/3823/4067/3822	4		GO:0048706	embryonic skeletal system development	10/290	128/18888	2.87172e-05	0.000918398	0.00071328	579/55959/4323/5156/6474/7043/9464/7291/4325/5125	10
GO:0046634	regulation of alpha-beta T cell activation	9/469	115/18888	0.00229014	0.0241637	0.0192095	3717/3566/100/246778/3105/9308/3133/339390/864	9		GO:0048738	cardiac muscle tissue development	14/290	248/18888	3.14163e-05	0.000995149	0.000772888	9096/7040/57538/3084/5156/8913/2702/6474/115701/84525/5592/4634/5350/9242	14
GO:0050954	sensory perception of mechanical stimulus	12/469	185/18888	0.0023228	0.0244442	0.0194324	2534/53405/4648/146183/10750/1285/4914/7124/93035/3753/4640/7852	12		GO:0060047	heart contraction	14/290	249/18888	3.28364e-05	0.00103032	0.000800205	6327/781/9096/27129/100506013/3751/8913/2702/3768/6474/84525/4634/775/5350	14
GO:0050848	regulation of calcium-mediated signaling	8/469	94/18888	0.00234785	0.0246128	0.0195665	120892/5533/100/799/933/7124/683/54209	8		GO:0010595	positive regulation of endothelial cell migration	10/290	131/18888	3.50685e-05	0.00109007	0.000846613	8829/5587/7040/54453/7057/8823/8828/8817/147372/9037	10
GO:0034381	plasma lipoprotein particle clearance	6/469	55/18888	0.00235107	0.0246128	0.0195665	344/3988/348/3162/3990/54209	6		GO:0043542	endothelial cell migration	15/290	286/18888	3.86046e-05	0.00117975	0.000916261	8829/5587/6591/7857/4017/7040/54453/7057/1803/8823/9353/8828/8817/147372/9037	15
GO:0033344	cholesterol efflux	7/469	74/18888	0.00238916	0.024882	0.0197805	344/10577/3988/4792/348/1071/54209	7		GO:1902903	regulation of supramolecular fiber organization	18/290	392/18888	3.86629e-05	0.00117975	0.000916261	1902/8829/50944/5587/1291/25959/11117/10395/9353/7043/10979/1490/79822/9037/6387/55243/4130/30008	18
GO:0050795	regulation of behavior	7/469	74/18888	0.00238916	0.024882	0.0197805	64220/3737/2048/8013/85445/348/1437	7		GO:0051017	actin filament bundle assembly	11/290	163/18888	4.49592e-05	0.0013594	0.00105579	1902/8829/50944/10395/56776/3693/7043/800/10979/1490/79822	11
GO:0071887	leukocyte apoptotic process	9/469	116/18888	0.00242964	0.0252381	0.0200636	64127/3579/6366/4067/355/6480/100/1514/3988	9		GO:0003176	aortic valve development	6/290	43/18888	4.70397e-05	0.00139691	0.00108492	6591/7040/11117/9353/7291/6586	6
GO:0006816	calcium ion transport	21/469	428/18888	0.00250047	0.025907	0.0205953	5371/2534/117144/274/6547/6366/140738/5777/4067/5533/10368/7439/126306/80024/10800/93589/9033/2771/11027/777/7852	21		GO:0010712	regulation of collagen metabolic process	6/290	43/18888	4.70397e-05	0.00139691	0.00108492	4921/7040/11117/2149/4239/7043	6
GO:0045766	positive regulation of angiogenesis	12/469	187/18888	0.00253864	0.0262348	0.0208559	6356/51752/3579/694/3553/1512/10800/2113/3162/1232/7852/6369	12		GO:0051893	regulation of focal adhesion assembly	7/290	63/18888	4.96237e-05	0.00144779	0.00112444	8829/1307/4323/10395/7057/7070/10979	7
GO:0002637	regulation of immunoglobulin production	7/469	75/18888	0.00258001	0.026526	0.0210874	3566/2048/933/90865/3133/7124/7293	7		GO:0090109	regulation of cell-substrate junction assembly	7/290	63/18888	4.96237e-05	0.00144779	0.00112444	8829/1307/4323/10395/7057/7070/10979	7
GO:0045123	cellular extravasation	7/469	75/18888	0.00258001	0.026526	0.0210874	6366/6401/6370/7124/683/3383/6403	7		GO:0003015	heart process	14/290	260/18888	5.25942e-05	0.00152112	0.00118138	6327/781/9096/27129/100506013/3751/8913/2702/3768/6474/84525/4634/775/5350	14
GO:0030100	regulation of endocytosis	16/469	291/18888	0.00263412	0.0270131	0.0214747	64127/7097/274/120892/23208/6366/344/5795/5533/933/6401/79772/348/567/5873/54209	16		GO:0002685	regulation of leukocyte migration	13/290	230/18888	5.93706e-05	0.0017023	0.0013221	7499/4323/4681/11117/5919/5054/7057/7070/1803/9353/83700/6387/4267	13
GO:0042060	wound healing	21/469	430/18888	0.00264168	0.0270218	0.0214816	7476/3717/7006/23208/146206/1606/5265/5777/4067/2048/7124/3640/348/3162/10019/5873/8837/7852/4321/953/6403	21		GO:0030574	collagen catabolic process	6/290	45/18888	6.12509e-05	0.0017325	0.00134556	9902/4323/140766/4314/4327/4325	6
GO:0033028	myeloid cell apoptotic process	5/469	39/18888	0.00265198	0.0270583	0.0215106	64127/3579/6480/1514/3988	5		GO:0010632	regulation of epithelial cell migration	15/290	298/18888	6.16228e-05	0.0017325	0.00134556	8829/5587/7040/54453/2252/411/7057/8823/9353/8828/8817/147372/9037/3037/5793	15
GO:0042982	amyloid precursor protein metabolic process	8/469	96/18888	0.0026796	0.0272183	0.0216378	274/8728/4067/6252/7124/9452/348/43	8		GO:0070252	actin-mediated cell contraction	9/290	113/18888	6.19867e-05	0.0017325	0.00134556	6327/781/4620/122786/8913/2702/55742/775/5350	9
GO:0042430	indole-containing compound metabolic process	4/469	24/18888	0.00268798	0.0272183	0.0216378	6999/217/8942/23498	4		GO:0043491	phosphatidylinositol 3-kinase/protein kinase B signal transduction	15/290	299/18888	6.39963e-05	0.00176707	0.0013724	1292/5587/79899/3481/1291/7040/5156/2149/3082/7057/8600/10979/9037/7291/3357	15
GO:0050855	regulation of B cell receptor signaling pathway	4/469	24/18888	0.00268798	0.0272183	0.0216378	5583/9214/4067/933	4		GO:0010763	positive regulation of fibroblast migration	4/290	15/18888	6.5013e-05	0.00176707	0.0013724	4921/7040/9590/7057	4
GO:0008203	cholesterol metabolic process	10/469	141/18888	0.00276823	0.0279605	0.0222278	134429/55911/9023/10577/3988/8542/348/3990/1071/23780	10		GO:2001028	positive regulation of endothelial cell chemotaxis	4/290	15/18888	6.5013e-05	0.00176707	0.0013724	5587/8823/8817/9037	4
GO:0010936	negative regulation of macrophage cytokine production	3/469	12/18888	0.0028315	0.0283856	0.0225658	64127/11213/54	3		GO:0045785	positive regulation of cell adhesion	20/290	485/18888	6.53485e-05	0.00176707	0.0013724	284217/8829/1307/2736/2199/3481/54453/11117/3685/1601/3908/7070/1803/8600/3912/10979/6387/79625/30008/3037	20
GO:0097264	self proteolysis	3/469	12/18888	0.0028315	0.0283856	0.0225658	22900/50846/5641	3		GO:0035023	regulation of Rho protein signal transduction	8/290	89/18888	6.75019e-05	0.00181057	0.00140619	2151/1902/8829/25959/2846/2149/10395/57569	8
GO:0106014	regulation of inflammatory response to wounding	3/469	12/18888	0.0028315	0.0283856	0.0225658	5777/90865/3605	3		GO:0051897	positive regulation of phosphatidylinositol 3-kinase/protein kinase B signal transduction	11/290	171/18888	6.94947e-05	0.00184912	0.00143613	5587/79899/3481/7040/5156/2149/3082/7057/8600/10979/9037	11
GO:1904018	positive regulation of vasculature development	12/469	190/18888	0.00289277	0.0289277	0.0229967	6356/51752/3579/694/3553/1512/10800/2113/3162/1232/7852/6369	12		GO:0034329	cell junction assembly	19/290	453/18888	7.9661e-05	0.0021028	0.00163315	8829/1307/84628/6591/2706/4323/2596/10395/7057/7070/2702/84525/2561/1000/10979/83700/266727/23768/7145	19
GO:0010742	macrophage derived foam cell differentiation	5/469	40/18888	0.00297003	0.0296266	0.0235523	5583/5320/4792/1437/1071	5		GO:0150116	regulation of cell-substrate junction organization	7/290	68/18888	8.14531e-05	0.00213317	0.00165674	8829/1307/4323/10395/7057/7070/10979	7
GO:0009612	response to mechanical stimulus	13/469	216/18888	0.0029972	0.0298236	0.0237089	64220/4353/2534/3553/355/9020/90865/4914/7124/4792/4615/9033/7852	13		GO:0048568	embryonic organ development	19/290	455/18888	8.441e-05	0.00219334	0.00170347	579/9096/80781/2736/4323/3481/2295/7040/100506013/5156/5919/6474/7043/8516/9645/9464/7291/4325/5125	19
GO:0070664	negative regulation of leukocyte proliferation	8/469	98/18888	0.00304688	0.0302431	0.0240424	10457/3135/5777/4067/5320/90865/3133/339390	8		GO:0032964	collagen biosynthetic process	6/290	48/18888	8.8792e-05	0.00228932	0.00177801	4921/5118/7040/11117/2149/7043	6
GO:0061756	leukocyte adhesion to vascular endothelial cell	6/469	58/18888	0.00308437	0.0305399	0.0242783	6366/6401/6370/7124/2113/6403	6		GO:0032956	regulation of actin cytoskeleton organization	16/290	344/18888	8.95798e-05	0.00229187	0.00177999	1902/8829/50944/5587/5156/25959/10395/9353/7043/10979/83700/1490/79822/9037/6387/55243	16
GO:0010623	programmed cell death involved in cell development	4/469	25/18888	0.00313798	0.0309184	0.0245792	1776/3553/4914/56159	4		GO:0051899	membrane depolarization	8/290	93/18888	9.23268e-05	0.00234411	0.00182057	6327/781/1291/2273/8913/2702/1134/775	8
GO:0010878	cholesterol storage	4/469	25/18888	0.00313798	0.0309184	0.0245792	134429/10577/3988/54209	4		GO:0003018	vascular process in circulatory system	14/290	275/18888	9.5868e-05	0.00241558	0.00187608	3269/5139/7040/27345/2149/9590/9353/2702/6533/79987/5592/6529/10979/3357	14
GO:0032720	negative regulation of tumor necrosis factor production	7/469	78/18888	0.00322336	0.0316819	0.0251863	64127/23208/10457/5777/11213/54/54209	7		GO:0050922	negative regulation of chemotaxis	7/290	70/18888	9.81259e-05	0.00245389	0.00190582	8829/4681/7057/1803/9353/223117/9037	7
GO:0001818	negative regulation of cytokine production	19/469	381/18888	0.00329859	0.0323422	0.0257112	54941/10333/5371/3134/64127/22900/9111/23208/10457/5777/2048/113/90865/1540/9308/7124/11213/54/54209	19		GO:1903055	positive regulation of extracellular matrix organization	5/290	31/18888	0.000100954	0.00250577	0.00194612	4921/7040/11117/23187/30008	5
GO:0090077	foam cell differentiation	5/469	41/18888	0.00331472	0.0323427	0.0257115	5583/5320/4792/1437/1071	5		GO:0043114	regulation of vascular permeability	6/290	50/18888	0.000112064	0.00275037	0.00213609	3269/5139/7040/9590/9353/10979	6
GO:1904407	positive regulation of nitric oxide metabolic process	5/469	41/18888	0.00331472	0.0323427	0.0257115	10333/3717/3553/113277/7124	5		GO:0016485	protein processing	13/290	245/18888	0.000112462	0.00275037	0.00213609	4323/7092/2619/649/5054/7057/1803/85409/147372/8532/4325/5125/4311	13
GO:1903409	reactive oxygen species biosynthetic process	6/469	59/18888	0.00336308	0.0327351	0.0260235	4353/10333/2534/3988/5873/8837	6		GO:0016055	Wnt signaling pathway	19/290	466/18888	0.000115289	0.00278477	0.0021628	9096/147906/55959/6591/1291/7040/4286/388336/1601/85409/166336/27303/115701/1000/10979/9037/8532/4920/63923	19
GO:0006586	indolalkylamine metabolic process	3/469	13/18888	0.00361359	0.0349754	0.0278045	6999/8942/23498	3		GO:0007044	cell-substrate junction assembly	8/290	96/18888	0.000115543	0.00278477	0.0021628	8829/1307/4323/10395/7057/7070/10979/7145	8
GO:0036006	cellular response to macrophage colony-stimulating factor stimulus	3/469	13/18888	0.00361359	0.0349754	0.0278045	81501/7097/54209	3		GO:0045216	cell-cell junction organization	12/290	213/18888	0.000117365	0.00278718	0.00216468	6591/2706/7040/2149/2702/84525/79987/7043/1000/10979/83700/55243	12
GO:0046629	gamma-delta T cell activation	4/469	26/18888	0.00363675	0.0349754	0.0278045	10803/64127/4277/6932	4		GO:0001958	endochondral ossification	5/290	32/18888	0.000118158	0.00278718	0.00216468	4323/338773/8817/4325/1305	5
GO:1904996	positive regulation of leukocyte adhesion to vascular endothelial cell	4/469	26/18888	0.00363675	0.0349754	0.0278045	6401/7124/2113/6403	4		GO:0036075	replacement ossification	5/290	32/18888	0.000118158	0.00278718	0.00216468	4323/338773/8817/4325/1305	5
GO:2000272	negative regulation of signaling receptor activity	4/469	26/18888	0.00363675	0.0349754	0.0278045	2048/799/1393/7124	4		GO:0198738	cell-cell signaling by wnt	19/290	468/18888	0.000121866	0.00285442	0.0022169	9096/147906/55959/6591/1291/7040/4286/388336/1601/85409/166336/27303/115701/1000/10979/9037/8532/4920/63923	19
GO:0001961	positive regulation of cytokine-mediated signaling pathway	6/469	60/18888	0.0036601	0.035116	0.0279163	837/340061/84166/7852/4321/54209	6		GO:0051153	regulation of striated muscle cell differentiation	8/290	97/18888	0.000124278	0.00289055	0.00224496	5587/84814/4323/7040/3084/338773/6474/84525	8
GO:0032735	positive regulation of interleukin-12 production	5/469	42/18888	0.00368727	0.0352086	0.0279899	64127/7097/3135/3605/3663	5		GO:1901888	regulation of cell junction assembly	12/290	215/18888	0.000128167	0.00296031	0.00229914	8829/1307/84628/6591/4323/10395/7057/7070/84525/10979/266727/23768	12
GO:0060251	regulation of glial cell proliferation	5/469	42/18888	0.00368727	0.0352086	0.0279899	5583/3553/4067/10800/7124	5		GO:0040013	negative regulation of locomotion	18/290	431/18888	0.000129372	0.00296754	0.00230476	8829/4681/7040/4286/11117/2192/10395/5054/7057/7070/1803/9353/5592/223117/9037/6387/5793/63923	18
GO:1903556	negative regulation of tumor necrosis factor superfamily cytokine production	7/469	80/18888	0.0037158	0.035397	0.0281396	64127/23208/10457/5777/11213/54/54209	7		GO:0014909	smooth muscle cell migration	8/290	98/18888	0.000133551	0.00304239	0.00236289	4921/1902/8829/5054/9353/5592/55742/3037	8
GO:0032479	regulation of type I interferon production	9/469	124/18888	0.00380438	0.0360698	0.0286745	54941/340061/7097/9111/6737/1540/4615/3663/4321	9		GO:0019934	cGMP-mediated signaling	5/290	33/18888	0.000137521	0.00311154	0.00241659	5139/7057/10846/5592/3357	5
GO:0032606	type I interferon production	9/469	124/18888	0.00380438	0.0360698	0.0286745	54941/340061/7097/9111/6737/1540/4615/3663/4321	9		GO:0051155	positive regulation of striated muscle cell differentiation	6/290	52/18888	0.000139933	0.00311622	0.00242023	5587/4323/7040/3084/6474/84525	6
GO:1903038	negative regulation of leukocyte cell-cell adhesion	10/469	148/18888	0.00392002	0.0370788	0.0294766	3566/6366/10457/3135/5777/5320/6370/3133/339390/864	10		GO:0043116	negative regulation of vascular permeability	4/290	18/18888	0.000140539	0.00311622	0.00242023	5139/9590/9353/10979	4
GO:0097061	dendritic spine organization	7/469	81/18888	0.00398247	0.0375811	0.0298759	7476/2534/120892/2048/348/5641/54209	7		GO:0097094	craniofacial suture morphogenesis	4/290	18/18888	0.000140539	0.00311622	0.00242023	4323/7043/7291/4325	4
GO:1903307	positive regulation of regulated secretory pathway	5/469	43/18888	0.0040889	0.038495	0.0306025	3134/3566/3822/8447/5873	5		GO:0050900	leukocyte migration	17/290	396/18888	0.000143303	0.00315645	0.00245148	7499/4323/7857/91662/4681/11117/5919/5054/7057/7070/1803/9353/8600/83700/6387/4920/4267	17
GO:0002687	positive regulation of leukocyte migration	10/469	149/18888	0.00411162	0.0385285	0.0306291	3579/6366/8995/6401/7124/3383/5641/6369/54209/6403	10		GO:0045667	regulation of osteoblast differentiation	10/290	156/18888	0.00015231	0.00333278	0.00258843	4921/5587/6591/3082/338773/10979/9464/7291/117581/63923	10
GO:0050768	negative regulation of neurogenesis	10/469	149/18888	0.00411162	0.0385285	0.0306291	7476/10371/6356/3553/2048/7124/8482/567/393/54209	10		GO:0045766	positive regulation of angiogenesis	11/290	187/18888	0.000154155	0.0033511	0.00260265	8829/5587/100506013/11117/5054/7057/8817/147372/9037/7291/63923	11
GO:0015914	phospholipid transport	8/469	103/18888	0.00413706	0.0386767	0.0307469	10396/344/5243/79895/10577/114786/348/1071	8		GO:0038084	vascular endothelial growth factor signaling pathway	6/290	53/18888	0.000155785	0.00336454	0.00261309	8829/5587/5156/11117/8828/147372	6
GO:0032740	positive regulation of interleukin-17 production	4/469	27/18888	0.00418667	0.0390496	0.0310434	3717/64127/4615/5008	4		GO:0086019	cell-cell signaling involved in cardiac conduction	5/290	34/18888	0.000159223	0.00341661	0.00265353	781/9096/8913/2702/775	5
GO:0043406	positive regulation of MAP kinase activity	7/469	82/18888	0.0042634	0.0396733	0.0315392	6283/10333/2322/120892/3553/2688/7124	7		GO:1901342	regulation of vasculature development	16/290	362/18888	0.000161188	0.00343661	0.00266906	8829/5587/7040/100506013/11117/5054/7057/140862/90139/3339/8817/147372/9037/6387/7291/63923	16
GO:0002712	regulation of B cell mediated immunity	6/469	62/18888	0.00431197	0.0398486	0.0316785	64127/5777/3133/7124/1380/54209	6		GO:0035924	cellular response to vascular endothelial growth factor stimulus	7/290	76/18888	0.00016548	0.00350565	0.00272268	8829/5587/5156/11117/2619/8828/147372	7
GO:0002889	regulation of immunoglobulin mediated immune response	6/469	62/18888	0.00431197	0.0398486	0.0316785	64127/5777/3133/7124/1380/54209	6		GO:0002693	positive regulation of cellular extravasation	4/290	19/18888	0.000175874	0.00370226	0.00287538	7499/7070/83700/4267	4
GO:0033619	membrane protein proteolysis	6/469	62/18888	0.00431197	0.0398486	0.0316785	8728/51752/3553/1512/7124/348	6		GO:0072001	renal system development	15/290	329/18888	0.000184206	0.00385327	0.00299266	9096/8829/84662/55959/8642/2736/5156/25959/170690/9353/392255/8516/3037/5125/4311	15
GO:0010469	regulation of signaling receptor activity	8/469	104/18888	0.00438718	0.0404506	0.0321572	3717/407738/154/10368/2048/799/1393/7124	8		GO:0150115	cell-substrate junction organization	8/290	103/18888	0.000188899	0.00392674	0.00304972	8829/1307/4323/10395/7057/7070/10979/7145	8
GO:0009159	deoxyribonucleoside monophosphate catabolic process	3/469	14/18888	0.00451506	0.0408398	0.0324665	1890/1807/100	3		GO:0001954	positive regulation of cell-matrix adhesion	6/290	56/18888	0.000212009	0.00433582	0.00336744	8829/1307/54453/7070/10979/30008	6
GO:0032621	interleukin-18 production	3/469	14/18888	0.00451506	0.0408398	0.0324665	64127/7097/7124	3		GO:0010761	fibroblast migration	6/290	56/18888	0.000212009	0.00433582	0.00336744	4921/79899/7040/9590/7057/7145	6
GO:0032661	regulation of interleukin-18 production	3/469	14/18888	0.00451506	0.0408398	0.0324665	64127/7097/7124	3		GO:0002040	sprouting angiogenesis	11/290	194/18888	0.000212489	0.00433582	0.00336744	8829/4017/7040/100506013/7057/9353/90139/55742/147372/9037/63923	11
GO:0045348	positive regulation of MHC class II biosynthetic process	3/469	14/18888	0.00451506	0.0408398	0.0324665	3717/113277/90865	3		GO:0110020	regulation of actomyosin structure organization	8/290	105/18888	0.000215753	0.00437558	0.00339832	1902/8829/5587/10395/7043/10979/1490/79822	8
GO:0051608	histamine transport	3/469	14/18888	0.00451506	0.0408398	0.0324665	4067/6581/1437	3		GO:0050804	modulation of chemical synaptic transmission	19/290	493/18888	0.000236778	0.00477287	0.00370687	9162/3269/50944/84628/388336/27345/8499/815/2149/9590/81832/3908/6533/6529/2892/1000/4130/4920/4311	19
GO:0071888	macrophage apoptotic process	3/469	14/18888	0.00451506	0.0408398	0.0324665	64127/6480/1514	3		GO:0035051	cardiocyte differentiation	10/290	165/18888	0.000240471	0.00481812	0.00374202	9096/7040/57538/3084/5156/6474/115701/5592/9464/7291	10
GO:0140052	cellular response to oxidised low-density lipoprotein particle stimulus	3/469	14/18888	0.00451506	0.0408398	0.0324665	10333/4615/54209	3		GO:0099177	regulation of trans-synaptic signaling	19/290	494/18888	0.000242888	0.00483741	0.003757	9162/3269/50944/84628/388336/27345/8499/815/2149/9590/81832/3908/6533/6529/2892/1000/4130/4920/4311	19
GO:2001140	positive regulation of phospholipid transport	3/469	14/18888	0.00451506	0.0408398	0.0324665	10396/348/1071	3		GO:0032231	regulation of actin filament bundle assembly	8/290	107/18888	0.000245662	0.00486352	0.00377728	1902/8829/50944/10395/7043/10979/1490/79822	8
GO:0030890	positive regulation of B cell proliferation	5/469	44/18888	0.00452082	0.0408398	0.0324665	2048/100/115650/683/7293	5		GO:0007178	transmembrane receptor protein serine/threonine kinase signaling pathway	17/290	417/18888	0.000263299	0.00515583	0.00400431	2331/4681/5654/7040/11117/64388/8483/9719/1601/7057/10468/23090/3693/7043/392255/8516/10979	17
GO:0032414	positive regulation of ion transmembrane transporter activity	7/469	83/18888	0.00455907	0.0409095	0.0325219	154/7114/2048/486/5243/219527/54209	7		GO:0060973	cell migration involved in heart development	4/290	21/18888	0.000265077	0.00515583	0.00400431	8642/6591/9464/7291	4
GO:0050871	positive regulation of B cell activation	7/469	83/18888	0.00455907	0.0409095	0.0325219	64127/2048/100/115650/683/7293/30011	7		GO:2001044	regulation of integrin-mediated signaling pathway	4/290	21/18888	0.000265077	0.00515583	0.00400431	284217/5587/3908/3912	4
GO:0140115	export across plasma membrane	7/469	83/18888	0.00455907	0.0409095	0.0325219	10008/3737/92745/486/5243/81615/3753	7		GO:0032965	regulation of collagen biosynthetic process	5/290	38/18888	0.000273182	0.00528257	0.00410274	4921/7040/11117/2149/7043	5
GO:0050688	regulation of defense response to virus	6/469	63/18888	0.00466826	0.041796	0.0332267	340061/200316/3553/246778/4321/4277	6		GO:0010718	positive regulation of epithelial to mesenchymal transition	6/290	59/18888	0.000283117	0.00544305	0.00422738	4017/7040/1601/7043/10979/7291	6
GO:0051235	maintenance of location	17/469	337/18888	0.0047244	0.0421709	0.0335247	5371/8605/134429/2512/6366/7114/3553/5777/4067/126306/80024/10577/3988/7124/4792/348/54209	17		GO:0030048	actin filament-based movement	9/290	138/18888	0.000285237	0.0054523	0.00423456	6327/781/4620/122786/8913/2702/55742/775/5350	9
GO:1902652	secondary alcohol metabolic process	10/469	152/18888	0.00473112	0.0421709	0.0335247	134429/55911/9023/10577/3988/8542/348/3990/1071/23780	10		GO:0031345	negative regulation of cell projection organization	11/290	201/18888	0.000288522	0.00548357	0.00425885	7025/1902/8829/1601/7070/9353/22891/5376/223117/9037/5793	11
GO:0001773	myeloid dendritic cell activation	4/469	28/18888	0.00479007	0.0422283	0.0335703	81501/116071/1437/55509	4		GO:0060350	endochondral bone morphogenesis	6/290	60/18888	0.000310572	0.00586583	0.00455573	4323/338773/6474/8817/4325/1305	6
GO:0002675	positive regulation of acute inflammatory response	4/469	28/18888	0.00479007	0.0422283	0.0335703	3553/3133/7124/5008	4		GO:0014812	muscle cell migration	8/290	111/18888	0.000315689	0.00586583	0.00455573	4921/1902/8829/5054/9353/5592/55742/3037	8
GO:0032770	positive regulation of monooxygenase activity	4/469	28/18888	0.00479007	0.0422283	0.0335703	3553/7124/348/2643	4		GO:0030038	contractile actin filament bundle assembly	8/290	111/18888	0.000315689	0.00586583	0.00455573	1902/8829/10395/3693/7043/10979/1490/79822	8
GO:0050857	positive regulation of antigen receptor-mediated signaling pathway	4/469	28/18888	0.00479007	0.0422283	0.0335703	5583/100/1540/3988	4		GO:0043149	stress fiber assembly	8/290	111/18888	0.000315689	0.00586583	0.00455573	1902/8829/10395/3693/7043/10979/1490/79822	8
[truncated: 243 more rows]
[truncated: 12 more columns]

## Sheet: Her2
BP																				KEGG																								Reactome
[truncated: 267 more rows]
[truncated: 12 more columns]

## Sheet: LumB
BP																				KEGG																								Reactome
[truncated: 239 more rows]
[truncated: 12 more columns]

[truncated: 1 more sheets: Basal]
