# Supplementary material for: Scene: Inferring subtype-specific ceRNA modules in breast cancer
Source: Research Square preprint supplement (doi:10.21203/rs.3.rs-7181552/v1), 2025-07-23
Supplement: Supplementary file 2 [file 87d7122fee430ebcd023d3f2.xlsx]

## Sheet: Normal
DisGeNET																										HDO
Normal-ceRM1													Normal-ceRM2													Normal-ceRM1													Normal-ceRM2
ID	Description	GeneRatio	BgRatio	RichFactor	FoldEnrichment	zScore	pvalue	p.adjust	qvalue	geneID	Count		ID	Description	GeneRatio	BgRatio	RichFactor	FoldEnrichment	zScore	pvalue	p.adjust	qvalue	geneID	Count		ID	Description	GeneRatio	BgRatio	RichFactor	FoldEnrichment	zScore	pvalue	p.adjust	qvalue	geneID	Count		ID	Description	GeneRatio	BgRatio	RichFactor	FoldEnrichment	zScore	pvalue	p.adjust	qvalue	geneID
C3714514	Infection	27/178	491/21671	0.0549898	6.69486	11.6159	5.39299e-15	2.21922e-11	1.5827e-11	2323/57817/3106/341/2512/3811/3135/3553/355/6891/5742/57379/6401/5696/3105/1118/3133/10170/348/7293/3162/3383/3107/7850/6890/7852/5008	27		C1658953	tumor vasculature	13/91	200/21671	0.065	15.4793	13.3586	2.42943e-12	5.03924e-09	4.06441e-09	4858/161198/1003/1910/7450/947/3791/5175/54538/187/54567/7010/22915	13		DOID:934	viral infectious disease	18/85	336/7865	0.0535714	4.95693	7.7482	1.26214e-08	7.37087e-06	5.12826e-06	340061/3106/2512/3811/3135/3553/5777/355/2048/6891/57379/6401/3105/348/567/3383/3107/3663	18		DOID:3963	thyroid gland carcinoma	8/54	49/7865	0.163265	23.7793	13.2988	1.0468e-09	3.15545e-07	2.74229e-07	5787/1003/2324/22918/947/3791/51705/54538
C1290884	Inflammatory disorder	22/178	391/21671	0.056266	6.85023	10.6235	1.37369e-12	2.82637e-09	2.01571e-09	340061/57817/3106/122618/7253/5699/3811/3553/5777/57379/6368/6401/5696/3105/3162/567/3383/7941/3107/7852/5698/54209	22		C0018923	Hemangiosarcoma	12/91	162/21671	0.0740741	17.6402	13.8048	3.82485e-12	5.03924e-09	4.06441e-09	5787/1901/2324/7450/947/3791/51705/5175/2701/2078/7010/7075	12		DOID:417	autoimmune disease	17/85	333/7865	0.0510511	4.72372	7.25748	6.94534e-08	2.02804e-05	1.411e-05	64805/340061/3106/122618/7253/3553/355/6891/348/3162/567/3383/2889/50619/6890/5698/3663	17		DOID:1781	thyroid cancer	8/54	52/7865	0.153846	22.4074	12.8772	1.71959e-09	3.15545e-07	2.74229e-07	5787/1003/2324/22918/947/3791/51705/54538
C0151449	Primary SjC6gren's syndrome	19/178	312/21671	0.0608974	7.41409	10.3852	1.30044e-11	1.78377e-08	1.27215e-08	3106/23526/3553/5777/355/6891/5742/6737/3105/115650/970/348/567/3383/3107/7852/6362/5698/3663	19		C0003857	Congenital arteriovenous malformation	11/91	163/21671	0.0674847	16.071	12.5418	8.74207e-11	7.67845e-08	6.19307e-08	1003/7450/947/3791/5175/79633/90952/4855/64321/54567/7010	11		DOID:0081267	graft-versus-host disease	7/85	39/7865	0.179487	16.6078	10.2128	1.55907e-07	3.03499e-05	2.11158e-05	3134/3106/3135/355/3105/3133/3107	7		DOID:0050580	hereditary lymphedema	5/54	11/7865	0.454545	66.2037	17.9924	5.65383e-09	6.91652e-07	6.01091e-07	55901/2324/10203/2078/7075
C0151517	Complete atrioventricular block	20/178	403/21671	0.0496278	6.04204	9.29794	1.4419e-10	1.23864e-07	8.83375e-08	340061/3106/6275/140691/3811/3135/3553/355/6891/6737/3804/3105/3133/3107/393/6890/5698/3663/151306/6892	20		C3899665	Childhood Epithelioid Hemangioendothelioma	6/91	26/21671	0.230769	54.956	17.8761	9.97959e-10	5.25924e-07	4.24185e-07	2324/947/3791/5175/2078/857	6		DOID:633	myositis	8/85	62/7865	0.129032	11.9393	9.03847	2.80353e-07	4.09315e-05	2.84779e-05	3134/3106/3135/355/4624/3105/3133/3107	8		DOID:4977	lymphedema	5/54	14/7865	0.357143	52.0172	15.8849	2.41202e-08	2.21303e-06	1.92327e-06	55901/2324/10203/2078/7075
C3495559	Juvenile arthritis	21/178	450/21671	0.0466667	5.68154	9.13277	1.50503e-10	1.23864e-07	8.83375e-08	3106/1844/3811/3135/3553/355/6891/3804/113/6401/3105/1118/3162/3383/3107/54757/6890/7852/5008/5698/3663	21		C3900104	Adult Epithelioid Hemangioendothelioma	6/91	26/21671	0.230769	54.956	17.8761	9.97959e-10	5.25924e-07	4.24185e-07	2324/947/3791/5175/2078/857	6		DOID:612	primary immunodeficiency disease	13/85	227/7865	0.0572687	5.29904	6.86967	8.02169e-07	9.36933e-05	6.51868e-05	23149/355/6891/57379/115650/970/7293/567/50619/6890/7852/5336/6892	13		DOID:0060091	cardiovascular organ benign neoplasm	5/54	29/7865	0.172414	25.1117	10.8155	1.32331e-06	8.63668e-05	7.50585e-05	2324/3791/4855/54567/7010
C0019100	Severe Dengue	12/178	117/21671	0.102564	12.4869	11.3376	2.35463e-10	1.61488e-07	1.1517e-07	23601/3106/3811/3553/2048/6891/6401/3105/3383/3107/6890/7852	12		C0334538	Epithelioid hemangioendothelioma, malignant	6/91	29/21671	0.206897	49.2709	16.8912	2.03834e-09	8.95171e-07	7.22001e-07	2324/947/3791/5175/2078/857	6		DOID:2841	asthma	14/85	273/7865	0.0512821	4.7451	6.58276	1.09893e-06	0.000106962	7.44184e-05	64805/101/10911/3106/3135/3553/355/6891/3133/3162/3383/7941/3107/6890	14		DOID:75	lymphatic system disease	6/54	53/7865	0.113208	16.4885	9.40656	1.41199e-06	8.63668e-05	7.50585e-05	55901/2324/10203/79633/2078/7075
C0027121	Myositis	16/178	254/21671	0.0629921	7.66911	9.72964	3.53824e-10	1.90647e-07	1.35966e-07	10866/3106/6275/7253/3135/3553/5777/355/5742/6737/3105/348/3107/7852/5698/3663	16		C0206732	Epithelioid hemangioendothelioma	6/91	36/21671	0.166667	39.6905	15.0869	8.16347e-09	3.03893e-06	2.45105e-06	2324/947/3791/5175/2078/857	6		DOID:1176	bronchial disease	14/85	277/7865	0.0505415	4.67658	6.5112	1.30783e-06	0.000109111	7.59132e-05	64805/101/10911/3106/3135/3553/355/6891/3133/3162/3383/7941/3107/6890	14		DOID:175	vascular cancer	4/54	15/7865	0.266667	38.8395	12.1961	2.56186e-06	0.000117525	0.000102137	5787/3791/4855/54567
C3714757	Juvenile rheumatoid arthritis	14/178	183/21671	0.0765027	9.31399	10.2785	3.70639e-10	1.90647e-07	1.35966e-07	3106/3135/3553/355/6401/5696/3105/3162/3107/6890/7852/5698/3663/6892	14		C0278592	Adult Angiosarcoma	8/91	101/21671	0.0792079	18.8628	11.6845	1.03797e-08	3.03893e-06	2.45105e-06	5787/2324/7450/947/3791/51705/5175/7075	8		DOID:526	human immunodeficiency virus infectious disease	8/85	84/7865	0.0952381	8.81232	7.52391	2.98194e-06	0.000217682	0.000151451	340061/3106/3811/355/2048/57379/3105/3107	8		DOID:176	cardiovascular cancer	4/54	15/7865	0.266667	38.8395	12.1961	2.56186e-06	0.000117525	0.000102137	5787/3791/4855/54567
C0018522	Hallermann's Syndrome	6/178	13/21671	0.461538	56.191	18.1143	4.6167e-10	2.08109e-07	1.48419e-07	3106/2048/3105/3133/348/3383	6		C0279988	Childhood Angiosarcoma	8/91	101/21671	0.0792079	18.8628	11.6845	1.03797e-08	3.03893e-06	2.45105e-06	5787/2324/7450/947/3791/51705/5175/7075	8		DOID:866	vein disease	5/85	23/7865	0.217391	20.1151	9.59551	3.78092e-06	0.000224615	0.000156275	3106/3553/355/3162/3383	5		DOID:6432	pulmonary hypertension	9/54	184/7865	0.048913	7.12409	6.98887	3.7034e-06	0.000151016	0.000131243	1003/1910/7450/5175/7048/64321/2078/857/7010
C1527336	Sjogren's Syndrome	21/178	481/21671	0.043659	5.31537	8.70995	5.05732e-10	2.08109e-07	1.48419e-07	3106/10750/23526/3553/355/2048/6891/6737/57379/6401/5696/3105/115650/3162/3383/6890/7852/6362/5698/3663/2358	21		C0024221	Lymphangioma	5/91	22/21671	0.227273	54.1234	16.1883	2.90768e-08	7.66175e-06	6.17959e-06	2324/947/3791/79633/7010	5		DOID:6713	cerebrovascular disease	15/85	348/7865	0.0431034	3.98834	5.95989	3.84614e-06	0.000224615	0.000156275	64805/57817/10911/3106/3553/2048/6401/3105/348/3162/567/3383/7941/10062/1071	15		DOID:3316	perivascular tumor	3/54	10/7865	0.3	43.6944	11.2322	3.54901e-05	0.00118408	0.00102904	3791/4855/54567
C0036220	Kaposi Sarcoma	21/178	488/21671	0.0430328	5.23912	8.61952	6.56299e-10	2.45516e-07	1.75097e-07	51237/3106/6036/5973/3811/3135/3553/5777/2048/57379/6401/3105/970/7293/3162/3383/3107/8837/7852/5008/3663	21		C0018916	Hemangioma	10/91	256/21671	0.0390625	9.30246	8.67745	1.23267e-07	2.9528e-05	2.38158e-05	55901/358/2324/947/3791/51705/5175/2078/7010/6886	10		DOID:0060704	lymphoproliferative syndrome	4/85	13/7865	0.307692	28.4706	10.3607	8.4355e-06	0.000447848	0.000311589	355/6891/970/567	4		DOID:3850	hemangiopericytic tumor	3/54	10/7865	0.3	43.6944	11.2322	3.54901e-05	0.00118408	0.00102904	3791/4855/54567
C0014060	Encephalitis, St. Louis	16/178	272/21671	0.0588235	7.1616	9.30619	9.62119e-10	3.29927e-07	2.35297e-07	3106/3135/3553/355/2048/6891/6737/57379/144423/115650/970/348/7293/567/7852/3663	16		C1511789	Desmoplastic	7/91	117/21671	0.0598291	14.2479	9.33038	6.20971e-07	0.000134592	0.000108556	79812/947/3791/5175/79633/857/22915	7		DOID:0050161	lower respiratory tract disease	17/85	482/7865	0.0352697	3.26349	5.36076	1.19534e-05	0.000581733	0.000404739	64805/101/10911/3106/3135/3553/355/6891/3133/3162/3383/7941/3107/6890/8837/5698/3663	17		DOID:418	systemic scleroderma	6/54	94/7865	0.0638298	9.29669	6.72815	4.03839e-05	0.00119276	0.00103658	2324/7450/3791/5175/4855/857
C0001175	Acquired Immunodeficiency Syndrome	15/178	243/21671	0.0617284	7.51526	9.29469	1.70054e-09	5.2881e-07	3.77137e-07	10866/3106/3135/3553/355/6891/57379/3105/348/567/3383/3107/7852/6362/5008	15		C4722524	Blood Vessel Tumors	4/91	17/21671	0.235294	56.0336	14.7404	6.64023e-07	0.000134592	0.000108556	79812/22918/3791/5175	4		DOID:104	bacterial infectious disease	10/85	175/7865	0.0571429	5.28739	5.99502	1.70187e-05	0.000764534	0.000531921	3106/3811/3553/6891/6401/3105/3162/3383/6890/54209	10		DOID:1575	rheumatic disease	6/54	96/7865	0.0625	9.10301	6.64148	4.55002e-05	0.00119276	0.00103658	2324/7450/3791/5175/4855/857
C0035235	Respiratory Syncytial Virus Infections	15/178	244/21671	0.0614754	7.48446	9.26998	1.79911e-09	5.2881e-07	3.77137e-07	6036/140691/3811/3553/355/2048/6401/116071/84166/7293/567/3383/3107/6890/8837	15		C0015826	Fenestration (morphologic abnormality)	5/91	43/21671	0.116279	27.691	11.3767	9.91525e-07	0.000186619	0.000150518	2324/3791/83483/90952/857	5		DOID:7693	abdominal aortic aneurysm	6/85	54/7865	0.111111	10.281	7.1529	2.2741e-05	0.000948623	0.000660001	64805/3553/348/3162/7941/10062	6		DOID:419	scleroderma	6/54	96/7865	0.0625	9.10301	6.64148	4.55002e-05	0.00119276	0.00103658	2324/7450/3791/5175/4855/857
C0030809	Pemphigus Vulgaris	11/178	115/21671	0.0956522	11.6454	10.4164	2.85845e-09	7.84168e-07	5.59253e-07	10866/3106/3811/3135/2048/6891/3105/3107/6890/8837/6362	11		C4703473	Atherosclerotic lesion	9/91	253/21671	0.0355731	8.47149	7.76251	1.19042e-06	0.000207051	0.000166997	358/1901/1306/22918/5175/9079/7048/54567/22915	9		DOID:0060180	colitis	8/85	117/7865	0.0683761	6.3268	6.06744	3.49514e-05	0.00136077	0.000946753	3106/3553/355/2048/5742/3162/3383/7852	8		DOID:0060115	nervous system benign neoplasm	4/54	32/7865	0.125	18.206	8.1088	6.18953e-05	0.00151437	0.00131609	3791/5175/4855/857
C0042900	Vitiligo	18/178	395/21671	0.0455696	5.54797	8.30161	4.84432e-09	1.2459e-06	8.88551e-07	3134/3106/5699/3135/3553/355/5696/3105/3133/348/3162/3383/3107/10062/6890/7852/5698/5336	18		C4317089	Infantile hemangioma	6/91	82/21671	0.0731707	17.4251	9.6766	1.25724e-06	0.000207051	0.000166997	641700/2324/947/3791/5175/54567	6		DOID:5041	esophageal cancer	9/85	155/7865	0.0580645	5.37268	5.74682	4.07635e-05	0.00148787	0.00103518	3553/355/6891/5742/3162/7850/6890/7852/5698	9		DOID:10941	intracranial aneurysm	4/54	34/7865	0.117647	17.1351	7.83912	7.90158e-05	0.00181243	0.00157512	55901/7450/64321/8639
C2607914	Allergic rhinitis (disorder)	19/178	446/21671	0.0426009	5.18654	8.12998	5.31614e-09	1.28682e-06	9.17734e-07	64805/101/3106/6036/3135/3553/355/2048/6891/1118/231/7293/3383/7941/6890/338339/7852/5008/5336	19		C0158570	Vascular anomaly	5/91	47/21671	0.106383	25.3343	10.8449	1.55928e-06	0.000241688	0.000194934	2324/7450/3791/7010/7075	5		DOID:0050589	inflammatory bowel disease	10/85	197/7865	0.0507614	4.69692	5.49255	4.72441e-05	0.00162297	0.00112918	3106/3553/355/2048/5742/3162/567/3383/7852/3663	10		DOID:170	endocrine gland cancer	9/54	317/7865	0.0283912	4.13512	4.73733	0.000268345	0.00561245	0.00487759	5787/1003/2324/22918/947/3791/51705/54538/7048
C0275518	Acute infectious disease	13/178	198/21671	0.0656566	7.9935	8.99647	1.02947e-08	2.35347e-06	1.67845e-06	340061/57817/3106/7114/3553/355/6891/6737/3162/567/3383/6890/2358	13		C0339573	Glaucoma, Primary Open Angle	10/91	383/21671	0.0261097	6.21783	6.69031	4.76235e-06	0.000697154	0.000562291	1003/358/1306/3791/10203/1879/9457/857/7010/22915	10		DOID:0060005	autoimmune disease of endocrine system	6/85	62/7865	0.0967742	8.95446	6.5723	5.05226e-05	0.00163918	0.00114045	3106/7253/3553/355/3383/5698	6		DOID:13089	intracranial arterial disease	4/54	48/7865	0.0833333	12.1373	6.43499	0.000308767	0.00561245	0.00487759	55901/7450/64321/8639
C0023351	Tuberculoid leprosy	7/178	35/21671	0.2	24.3494	12.5809	1.24108e-08	2.68792e-06	1.91697e-06	3384/3811/6891/3804/3162/3383/6890	7		C0036220	Kaposi Sarcoma	11/91	488/21671	0.022541	5.36797	6.33754	6.30228e-06	0.000874027	0.000704948	1910/1901/2324/947/3791/5175/83483/7048/2078/54567/7010	11		DOID:3526	cerebral infarction	10/85	207/7865	0.0483092	4.47002	5.28811	7.18199e-05	0.00220752	0.00153587	57817/3106/3553/2048/3105/348/3162/3383/7941/10062	10		DOID:3527	cerebral arterial disease	4/54	48/7865	0.0833333	12.1373	6.43499	0.000308767	0.00561245	0.00487759	55901/7450/64321/8639
C0278764	Adult Burkitt Lymphoma	19/178	475/21671	0.04	4.86989	7.76085	1.46817e-08	3.02077e-06	2.15435e-06	29802/1844/3553/5777/355/2048/6891/57379/5696/3105/115650/83881/10170/567/3383/6890/338339/7852/5336	19		C0340543	Familial primary pulmonary hypertension	4/91	30/21671	0.133333	31.7524	10.9452	7.33339e-06	0.000909776	0.000733781	358/1910/64321/857	4		DOID:9074	systemic lupus erythematosus	8/85	136/7865	0.0588235	5.44291	5.46281	0.000102161	0.00279984	0.00194798	64805/122618/3553/355/6891/50619/6890/3663	8		DOID:2001	neuroma	3/54	20/7865	0.15	21.8472	7.76126	0.000321148	0.00561245	0.00487759	3791/5175/857
C0278879	Childhood Burkitt Lymphoma	19/178	477/21671	0.0398323	4.84947	7.7365	1.57027e-08	3.07699e-06	2.19445e-06	29802/1844/3553/5777/355/2048/6891/57379/5696/3105/115650/83881/10170/567/3383/6890/338339/7852/5336	19		C0206733	Strawberry nevus of skin	6/91	112/21671	0.0535714	12.7577	8.10102	7.76648e-06	0.000909776	0.000733781	641700/2324/947/3791/5175/54567	6		DOID:8857	lupus erythematosus	8/85	137/7865	0.0583942	5.40318	5.43418	0.000107552	0.00279984	0.00194798	64805/122618/3553/355/6891/50619/6890/3663	8		DOID:3192	neurilemmoma	3/54	20/7865	0.15	21.8472	7.76126	0.000321148	0.00561245	0.00487759	3791/5175/857
C0042164	Uveitis	14/178	247/21671	0.0566802	6.90065	8.48768	1.79223e-08	3.22091e-06	2.29709e-06	51237/3106/140691/3811/3553/355/3105/231/3162/3383/3107/7852/5698/3663	14		C2945695	Limb ischemia	7/91	171/21671	0.0409357	9.74854	7.45828	7.80956e-06	0.000909776	0.000733781	375033/7450/947/3791/4881/9457/7010	7		DOID:4362	cervical cancer	7/85	102/7865	0.0686275	6.35006	5.68441	0.000108178	0.00279984	0.00194798	3106/3553/5777/6891/5742/7293/6890	7		DOID:0060085	organ system benign neoplasm	7/54	201/7865	0.0348259	5.07232	4.8627	0.000410136	0.00684181	0.00594599	2324/3791/5175/4855/857/54567/7010
C0524910	Hepatitis C, Chronic	18/178	430/21671	0.0418605	5.09639	7.80799	1.80027e-08	3.22091e-06	2.29709e-06	10866/57817/3106/7114/3811/3553/355/6891/3804/5696/3105/3133/348/3162/3107/6890/7852/6362	18		C0018798	Congenital Heart Defects	10/91	406/21671	0.0246305	5.86559	6.42673	7.94112e-06	0.000909776	0.000733781	1003/2324/7450/79633/7048/187/83595/5138/7010/7148	10		DOID:0080809	chronic asthma	4/85	24/7865	0.166667	15.4216	7.39561	0.00011449	0.00279984	0.00194798	3106/6891/3133/3107	4		DOID:866	vein disease	3/54	23/7865	0.130435	18.9976	7.18671	0.00049169	0.00784566	0.0068184	5175/54567/7010
C0149678	Epstein-Barr Virus Infections	17/178	384/21671	0.0442708	5.38985	7.89858	2.02597e-08	3.4737e-06	2.47738e-06	216/3106/3811/3553/5777/355/57379/6401/3105/970/3133/3383/3107/6890/7852/5698/3663	17		C0027668	Neoplasms, Vascular Tissue	5/91	67/21671	0.0746269	17.7719	8.92845	9.18954e-06	0.00100893	0.000813758	1003/2324/947/54567/7010	5		DOID:1398	parasitic infectious disease	7/85	103/7865	0.0679612	6.28841	5.64674	0.000115062	0.00279984	0.00194798	2995/3811/355/348/3162/3383/6362	7		DOID:255	hemangioma	3/54	26/7865	0.115385	16.8056	6.71168	0.000711414	0.0108787	0.00945432	4855/54567/7010
C4703473	Atherosclerotic lesion	14/178	253/21671	0.055336	6.737	8.35308	2.42518e-08	3.99184e-06	2.8469e-06	101/57817/3553/6368/6401/1118/348/5360/3162/3383/7941/5008/1071/55509	14		C0276535	AIDS with Kaposi's sarcoma	4/91	33/21671	0.121212	28.8658	10.4027	1.0845e-05	0.00114306	0.000921939	2324/947/3791/7075	4		DOID:8577	ulcerative colitis	6/85	73/7865	0.0821918	7.60516	5.926	0.000127261	0.00297281	0.00206832	3553/355/2048/5742/3383/7852	6		DOID:2462	retinal vascular disease	6/54	161/7865	0.0372671	5.42788	4.71972	0.000768386	0.0112799	0.00980298	1003/7450/947/3791/54567/8639
C0948089	Acute Coronary Syndrome	18/178	440/21671	0.0409091	4.98057	7.67674	2.55792e-08	4.04839e-06	2.88723e-06	64805/57817/3106/3811/3553/355/5742/6401/3105/970/348/7293/3162/567/3383/7941/3663/1071	18		C0003962	Ascites	7/91	198/21671	0.0353535	8.41919	6.81032	2.02315e-05	0.00205038	0.00165374	358/7450/83483/79633/7048/2828/54567	7		DOID:12365	malaria	5/85	47/7865	0.106383	9.84355	6.35579	0.000140614	0.0031584	0.00219745	2995/3811/348/3162/3383	5		DOID:0060072	benign neoplasm	7/54	261/7865	0.0268199	3.90627	3.97009	0.00190735	0.0254379	0.0221072	2324/3791/5175/4855/857/54567/7010
C1847835	VITILIGO-ASSOCIATED MULTIPLE AUTOIMMUNE DISEASE SUSCEPTIBILITY 1 (finding)	15/178	302/21671	0.0496689	6.04705	8.03784	3.18136e-08	4.84863e-06	3.45795e-06	3134/3106/5699/3135/3553/355/5696/3105/3133/3162/3383/3107/10062/6890/5698	15		C1150929	2-oxo-hept-3-ene-1,7-dioate hydratase activity	3/91	14/21671	0.214286	51.0306	12.1598	2.52137e-05	0.00240639	0.00194088	358/64321/857	3		DOID:12361	Graves' disease	5/85	48/7865	0.104167	9.63848	6.2745	0.000155641	0.00336646	0.0023422	3106/7253/3553/355/3383	5		DOID:1426	ureteral disease	2/54	10/7865	0.2	29.1296	7.40042	0.00201008	0.0254379	0.0221072	64321/7148
C0742343	Acute Chest Syndrome	17/178	405/21671	0.0419753	5.11038	7.59901	4.39776e-08	6.46314e-06	4.60939e-06	10866/64805/57817/3106/3553/355/5742/6401/3105/348/7293/3162/3383/7941/3107/3663/1071	17		C0026691	Mucocutaneous Lymph Node Syndrome	9/91	370/21671	0.0243243	5.79266	6.03813	2.55708e-05	0.00240639	0.00194088	375033/358/7450/3791/5175/64641/7048/4855/5138	9		DOID:2349	arteriosclerosis	8/85	153/7865	0.0522876	4.83814	5.011	0.000231361	0.00482553	0.00335735	3553/355/348/231/5360/567/7941/10062	8		DOID:5241	hemangioblastoma	2/54	10/7865	0.2	29.1296	7.40042	0.00201008	0.0254379	0.0221072	4855/54567
C0022408	Arthropathy	12/178	187/21671	0.0641711	7.81265	8.51472	4.97676e-08	7.06185e-06	5.03637e-06	57817/3106/3553/2048/5742/3105/3162/567/6362/5008/5698/151306	12		C0280449	secondary acute myeloid leukemia	5/91	91/21671	0.0549451	13.0848	7.50167	4.08819e-05	0.00371461	0.00299602	2324/947/3791/2122/83595	5		DOID:7147	ankylosing spondylitis	4/85	29/7865	0.137931	12.7627	6.63284	0.000245587	0.00486315	0.00338352	3106/6891/6890/5698	4		DOID:9620	vesicoureteral reflux	2/54	10/7865	0.2	29.1296	7.40042	0.00201008	0.0254379	0.0221072	64321/7148
C0006267	Bronchiectasis	12/178	190/21671	0.0631579	7.6893	8.42793	5.93157e-08	7.87368e-06	5.61535e-06	3106/3553/51314/6891/6737/115650/567/3383/3107/6890/7852/6892	12		C0376618	Endotoxemia	9/91	401/21671	0.0224439	5.34485	5.7028	4.78133e-05	0.0041996	0.0033872	1003/7450/5175/54538/5166/64321/7010/22915/7075	9		DOID:2352	hemochromatosis	3/85	12/7865	0.25	23.1324	8.0194	0.000249819	0.00486315	0.00338352	57817/3162/567	3		DOID:5844	myocardial infarction	8/54	350/7865	0.0228571	3.3291	3.70615	0.00245734	0.0300615	0.0261254	1910/7450/3791/5175/4881/2701/7048/7010
C0023343	Leprosy	12/178	190/21671	0.0631579	7.6893	8.42793	5.93157e-08	7.87368e-06	5.61535e-06	79690/340061/57817/3106/3811/3553/3105/348/3107/283234/6890/55509	12		C2973725	Pulmonary arterial hypertension	9/91	413/21671	0.0217918	5.18955	5.58221	5.99992e-05	0.00509993	0.00411336	2324/3791/9457/5166/7048/64321/187/857/54567	9		DOID:3454	brain infarction	10/85	249/7865	0.0401606	3.71604	4.55212	0.000327245	0.0060995	0.0042437	57817/3106/3553/2048/3105/348/3162/3383/7941/10062	10		DOID:0060688	arteriovenous malformations of the brain	2/54	12/7865	0.166667	24.2747	6.70845	0.00292228	0.034596	0.0300662	3791/4855
C0026691	Mucocutaneous Lymph Node Syndrome	16/178	370/21671	0.0432432	5.26474	7.52982	7.44191e-08	9.56983e-06	6.82501e-06	10866/64805/57817/10911/3106/3135/3553/2048/6401/3105/3133/7293/3162/3383/7941/3107	16		C0948089	Acute Coronary Syndrome	9/91	440/21671	0.0204545	4.8711	5.32722	9.72677e-05	0.00800938	0.00645998	1004/375033/7450/947/3791/5175/4881/2701/22915	9		DOID:865	vasculitis	6/85	87/7865	0.0689655	6.38134	5.27542	0.000334692	0.0060995	0.0042437	3106/3553/355/3105/3162/3383	6		DOID:3393	coronary artery disease	9/54	453/7865	0.0198675	2.89367	3.45185	0.00337165	0.0386686	0.0336056	1003/1910/7450/3791/5175/4881/2701/7048/7010
C0024535	Malaria, Falciparum	11/178	158/21671	0.0696203	8.47607	8.58306	7.96338e-08	9.9301e-06	7.08195e-06	1769/57817/3106/3553/355/6401/3105/1118/3162/3383/3107	11		C1402315	Vascular lesions	5/91	111/21671	0.045045	10.7272	6.67187	0.000105484	0.00842277	0.0067934	358/7450/947/7048/7010	5		DOID:2789	parasitic protozoa infectious disease	6/85	88/7865	0.0681818	6.30882	5.2345	0.000356109	0.0060995	0.0042437	2995/3811/348/3162/3383/6362	6		DOID:2349	arteriosclerosis	5/54	153/7865	0.0326797	4.75974	3.90468	0.00383143	0.0426102	0.0370311	3791/5175/7048/4855/857
C0920350	Autoimmune thyroiditis	11/178	161/21671	0.068323	8.31813	8.48172	9.65331e-08	1.16833e-05	8.33233e-06	2323/3106/7253/3553/355/2048/6891/113/3105/3383/3107	11		C0206655	Alveolar rhabdomyosarcoma	5/91	115/21671	0.0434783	10.354	6.53113	0.000124664	0.00951909	0.00767764	947/3791/10252/7048/857	5		DOID:3627	aortic aneurysm	6/85	89/7865	0.0674157	6.23794	5.1942	0.000378585	0.0060995	0.0042437	64805/3553/348/3162/7941/10062	6		DOID:0060090	central nervous system benign neoplasm	2/54	14/7865	0.142857	20.8069	6.16713	0.00399392	0.0431109	0.0374662	3791/4855
C0398650	Immune thrombocytopenic purpura	15/178	338/21671	0.0443787	5.40298	7.42455	1.38594e-07	1.62947e-05	1.16211e-05	3106/3811/3553/355/2048/5742/6737/3804/6401/3105/115650/970/7293/7852/6362	15		C0155765	Disease of capillaries	4/91	61/21671	0.0655738	15.6159	7.42315	0.00012644	0.00951909	0.00767764	7450/54538/90952/7010	4		DOID:8893	psoriasis	6/85	89/7865	0.0674157	6.23794	5.1942	0.000378585	0.0060995	0.0042437	6891/348/3383/3107/6890/5698	6		DOID:0002116	pterygium	2/54	15/7865	0.133333	19.4198	5.9369	0.00458817	0.0481102	0.041811	3791/5175
C0750901	Alzheimer Disease, Early Onset	11/178	174/21671	0.0632184	7.69666	8.07114	2.12439e-07	2.42829e-05	1.73181e-05	274/3106/341/3553/355/3105/79890/348/3162/5336/54209	11		C0005779	Blood Coagulation Disorders	7/91	267/21671	0.0262172	6.24345	5.59821	0.000133553	0.00977536	0.00788433	7450/947/3791/5175/9457/2078/22915	7		DOID:3407	carotid artery disease	5/85	58/7865	0.0862069	7.97667	5.57393	0.000382718	0.0060995	0.0042437	10911/567/7941/10062/1071	5
C0751356	Idiopathic Inflammatory Myopathies	9/178	106/21671	0.0849057	10.337	8.76956	2.30323e-07	2.56156e-05	1.82685e-05	3106/6275/3553/5742/6737/3105/3107/7852/3663	9		C0024232	Lymphatic Metastasis	9/91	463/21671	0.0194384	4.62913	5.12587	0.000142821	0.00979925	0.0079036	8404/2324/7450/8436/947/3791/187/857/80177	9		DOID:4960	bone marrow cancer	8/85	165/7865	0.0484848	4.48627	4.73042	0.000386441	0.0060995	0.0042437	2323/3553/5777/355/348/567/3383/8837	8
C1141957	HIV disease progression	7/178	54/21671	0.12963	15.782	9.89748	2.86632e-07	3.10392e-05	2.21365e-05	10866/3106/3811/348/3383/3107/7852	7		C0280141	Acute Undifferentiated Leukemia	5/91	119/21671	0.0420168	10.006	6.39714	0.000146411	0.00979925	0.0079036	22918/947/3791/2078/6886	5		DOID:0050338	primary bacterial infectious disease	7/85	126/7865	0.0555556	5.14052	4.89711	0.000401539	0.00617102	0.00429346	3106/3811/3553/6891/3105/6890/54209	7
C0011311	Dengue Fever	15/178	360/21671	0.0416667	5.0728	7.09142	3.11246e-07	3.28405e-05	2.34212e-05	23601/340061/3106/140691/3811/3553/6891/57379/3804/6401/3105/3133/8542/3107/6890	15		C4722099	High grade glioma	6/91	190/21671	0.0315789	7.5203	5.86194	0.000150803	0.00979925	0.0079036	22918/947/3791/5175/64321/83595	6		DOID:2531	hematologic cancer	13/85	412/7865	0.0315534	2.91962	4.18349	0.000434263	0.00650281	0.00452431	2323/526/3553/5777/355/57379/348/3162/567/3383/8837/7852/5698	13
C0036202	Sarcoidosis	16/178	413/21671	0.0387409	4.7166	6.93985	3.29643e-07	3.3912e-05	2.41854e-05	3106/3135/3553/355/6891/6401/5696/3105/1118/567/3107/6890/7852/6362/5698/3663	16		C1378511	Undifferentiated leukemia	5/91	120/21671	0.0416667	9.92262	6.36464	0.000152275	0.00979925	0.0079036	22918/947/3791/2122/6886	5		DOID:10952	nephritis	9/85	219/7865	0.0410959	3.80258	4.39647	0.00055993	0.00817497	0.00568771	3553/355/1285/6401/348/3383/7941/2889/6362	9
C0343641	Human papilloma virus infection	16/178	429/21671	0.037296	4.54069	6.74077	5.46515e-07	5.38025e-05	3.83709e-05	340061/3811/3135/3553/5777/355/6891/6401/5696/3105/3133/3107/6890/8837/7852/5698	16		C0085083	Ovarian Hyperstimulation Syndrome	4/91	64/21671	0.0625	14.8839	7.2232	0.000152474	0.00979925	0.0079036	1901/2324/7450/3791	4		DOID:423	myopathy	12/85	372/7865	0.0322581	2.98482	4.09927	0.000604979	0.00837057	0.00582379	3134/246329/274/3106/3135/355/1286/1285/4624/3105/3133/3107	12
C0027430	Nasal Polyps	17/178	484/21671	0.035124	4.27624	6.63369	5.49139e-07	5.38025e-05	3.83709e-05	3106/6036/3135/3553/51314/6891/5742/57379/6401/3105/1118/3383/7850/6890/6362/5008/6892	17		C0002390	Extrinsic allergic alveolitis	4/91	65/21671	0.0615385	14.6549	7.15952	0.000161954	0.0100828	0.00813234	358/947/3791/22915	4		DOID:13241	Behcet's disease	5/85	64/7865	0.078125	7.22886	5.22956	0.000605362	0.00837057	0.00582379	3106/3553/355/3162/3383	5
C0677607	Hashimoto Disease	14/178	335/21671	0.041791	5.08794	6.86217	7.55223e-07	6.99977e-05	4.9921e-05	57817/3106/7253/5973/3811/3135/3553/355/2048/3105/3383/3107/5698/5336	14		C0017181	Gastrointestinal Hemorrhage	5/91	122/21671	0.0409836	9.75995	6.30075	0.00016454	0.0100828	0.00813234	7450/6578/7048/54567/7148	5		DOID:799	varicose veins	3/85	16/7865	0.1875	17.3493	6.84215	0.000616326	0.00837057	0.00582379	3553/355/3162	3
C0013537	Eclampsia	12/178	241/21671	0.0497925	6.0621	7.19149	7.73292e-07	6.99977e-05	4.9921e-05	3106/3811/3135/3553/355/6891/5742/3105/3133/348/3107/6890	12		C4049446	Neointimal hyperplasia	6/91	198/21671	0.030303	7.21645	5.70628	0.000188654	0.0112978	0.00911227	1901/7450/5175/10252/857/22915	6		DOID:520	aortic disease	6/85	98/7865	0.0612245	5.66507	4.8572	0.000634763	0.00842504	0.00586169	64805/3553/348/3162/7941/10062	6
C0266929	Chronic Periodontitis	13/178	287/21671	0.0452962	5.51468	7.00672	7.74311e-07	6.99977e-05	4.9921e-05	101/51237/57817/3106/3553/6401/84166/3105/348/3383/7850/7852/5008	13		C0157946	Osteoarthrosis, localized, not specified whether primary or secondary	3/91	28/21671	0.107143	25.5153	8.42912	0.000217463	0.0126773	0.0102249	5175/2078/857	3		DOID:13141	uveitis	5/85	65/7865	0.0769231	7.11765	5.17649	0.000650296	0.0084394	0.00587168	3106/3553/3105/3383/6362	5
C0026896	Myasthenia Gravis	14/178	336/21671	0.0416667	5.0728	6.84711	7.82478e-07	6.99977e-05	4.9921e-05	51237/3106/3135/3553/355/6891/3105/115650/348/7293/3107/6890/7852/5008	14		C0024796	Marfan Syndrome	5/91	130/21671	0.0384615	9.15934	6.05924	0.000221312	0.0126773	0.0102249	1003/7450/947/7048/22915	5		DOID:399	tuberculosis	6/85	100/7865	0.06	5.55176	4.78796	0.000706612	0.00897091	0.00624147	3106/3811/3553/6891/3105/6890	6
C0949691	Spondylarthropathies	8/178	92/21671	0.0869565	10.5867	8.38569	9.15411e-07	8.01472e-05	5.71594e-05	3106/3811/3553/355/3105/567/3107/5698	8		C0600452	Hepatopulmonary Syndrome	3/91	29/21671	0.103448	24.6355	8.27064	0.00024182	0.0135573	0.0109347	1910/857/7010	3		DOID:66	muscle tissue disease	12/85	382/7865	0.0314136	2.90668	3.99313	0.000765441	0.00934657	0.00650284	3134/246329/274/3106/3135/355/1286/1285/4624/3105/3133/3107	12
C0018995	Hemochromatosis	8/178	93/21671	0.0860215	10.4729	8.33122	9.94611e-07	8.52672e-05	6.08109e-05	3134/57817/3106/2512/3105/348/3162/567	8		C1845050	PIGMENTARY DISORDER, RETICULATE, WITH SYSTEMIC MANIFESTATIONS	6/91	209/21671	0.0287081	6.83664	5.50586	0.000252544	0.0138636	0.0111817	7450/3791/5175/54538/22915/8639	6		DOID:120	female reproductive organ cancer	11/85	329/7865	0.0334347	3.09369	4.05491	0.00077349	0.00934657	0.00650284	3106/199713/3553/5777/355/6891/5742/3105/7293/3383/6890	11
C0948201	Alloimmunisation	7/178	65/21671	0.107692	13.1112	8.89916	1.04436e-06	8.68295e-05	6.19251e-05	3135/3553/6891/6737/7293/3107/6890	7		C0595921	Intraocular pressure disorder	7/91	304/21671	0.0230263	5.48355	5.11225	0.000295184	0.0153086	0.0123472	1910/6578/5175/2078/857/7010/22915	7		DOID:10591	pre-eclampsia	7/85	141/7865	0.0496454	4.59366	4.50056	0.000789079	0.00934657	0.00650284	1769/10911/355/5742/3105/3383/10062	7
C0021053	Immune System Diseases	16/178	451/21671	0.0354767	4.31919	6.48244	1.05504e-06	8.68295e-05	6.19251e-05	5973/3811/3553/355/2048/6891/57379/84166/348/3162/3107/283234/6890/7852/3663/5336	16		C0334533	Arteriovenous hemangioma	4/91	76/21671	0.0526316	12.5338	6.54076	0.000296296	0.0153086	0.0123472	90952/4855/64321/7010	4		DOID:5295	intestinal disease	10/85	279/7865	0.0358423	3.31647	4.11778	0.00080022	0.00934657	0.00650284	3106/3553/355/2048/5742/3162/567/3383/7852/3663	10
C2747816	Complicated malaria	10/178	166/21671	0.060241	7.33417	7.4553	1.19446e-06	9.63766e-05	6.87339e-05	57817/3811/3553/3804/6401/3105/3162/3383/6890/5698	10		C2363973	Chronic thromboembolic pulmonary hypertension	4/91	76/21671	0.0526316	12.5338	6.54076	0.000296296	0.0153086	0.0123472	1003/947/3791/5175	4		DOID:783	end stage renal disease	7/85	144/7865	0.0486111	4.49796	4.42793	0.000893757	0.0102344	0.00712054	57817/3553/1286/1285/348/3383/7941	7
C0017661	IGA Glomerulonephritis	16/178	456/21671	0.0350877	4.27183	6.42603	1.21826e-06	9.64068e-05	6.87554e-05	3106/3553/355/2048/57379/6401/84166/5696/3105/8542/348/3162/3383/7941/7850/3663	16		C0013720	Ehlers-Danlos Syndrome	4/91	77/21671	0.0519481	12.3711	6.49089	0.000311534	0.0154886	0.0124923	7450/7048/7148/22915	4		DOID:3480	uveal disease	5/85	71/7865	0.0704225	6.51616	4.88008	0.000974456	0.0109439	0.00761417	3106/3553/3105/3383/6362	5
C3541994	Drug Hypersensitivity Syndrome	6/178	43/21671	0.139535	16.988	9.55016	1.337e-06	0.000102416	7.3041e-05	3106/7253/3553/3105/231/2358	6		C3693482	Giant Cell Fibroblastoma	4/91	77/21671	0.0519481	12.3711	6.49089	0.000311534	0.0154886	0.0124923	947/7048/2078/2828	4		DOID:0050848	obstructive sleep apnea	4/85	42/7865	0.0952381	8.81232	5.30591	0.00104017	0.0113376	0.00788808	3553/3162/3383/7941	4
C0392514	Hereditary hemochromatosis	12/178	254/21671	0.0472441	5.75184	6.9325	1.34398e-06	0.000102416	7.3041e-05	3134/57817/3106/2512/3553/6401/3105/348/231/567/3383/3107	12		C0392784	Dermatofibrosarcoma Protuberans	4/91	78/21671	0.0512821	12.2125	6.44193	0.000327327	0.0159723	0.0128825	947/7048/2078/2828	4		DOID:1074	kidney failure	10/85	289/7865	0.0346021	3.20171	3.98594	0.00104834	0.0113376	0.00788808	57817/3553/355/1286/1285/348/3162/567/3383/7941	10
C0010823	Cytomegalovirus Infections	16/178	462/21671	0.034632	4.21635	6.35939	1.44401e-06	0.000108038	7.70506e-05	1769/3106/3811/3135/3553/4245/3804/6401/3105/3133/348/7293/567/3383/3107/7852	16		C0206734	Hemangioblastoma	4/91	79/21671	0.0506329	12.0579	6.39386	0.000343685	0.0163708	0.0132039	358/3791/54567/7010	4		DOID:0080208	metabolic dysfunction-associated steatotic liver disease	7/85	151/7865	0.0463576	4.28944	4.26592	0.00118087	0.0124597	0.00866881	57817/3553/348/7941/10062/3663/151306	7
C0007273	Carotid Artery Diseases	7/178	69/21671	0.101449	12.3512	8.59427	1.5744e-06	0.00011569	8.25081e-05	6401/348/7293/5360/3162/3383/6362	7		C0023267	Fibroid Tumor	8/91	413/21671	0.0193705	4.61294	4.81392	0.000347919	0.0163708	0.0132039	1910/7450/947/5175/857/7010/22915/7075	8		DOID:3342	bone inflammation disease	9/85	244/7865	0.0368852	3.41297	4.00205	0.00121069	0.0124597	0.00866881	3106/3553/355/6891/567/7941/6890/5698/3663	9
C0041327	Tuberculosis, Pulmonary	14/178	358/21671	0.0391061	4.76106	6.53011	1.65426e-06	0.00011779	8.40054e-05	340061/57817/3106/3811/3553/6891/6401/5696/3105/3162/3383/3107/6890/7852	14		C0085635	Photopsia	3/91	35/21671	0.0857143	20.4122	7.46355	0.000425326	0.019662	0.0158584	2004/7450/2078	3		DOID:9360	intrinsic asthma	3/85	20/7865	0.15	13.8794	6.02776	0.0012161	0.0124597	0.00866881	3106/6891/3133	3
C0375023	Respiratory syncytial virus (RSV) infection in conditions classified elsewhere and of unspecified site	16/178	467/21671	0.0342612	4.17121	6.30472	1.66022e-06	0.00011779	8.40054e-05	6036/140691/3553/355/2048/6401/116071/84166/5696/3105/3162/567/3383/3107/6890/5698	16		C1519666	Tumor-Associated Vasculature	4/91	84/21671	0.047619	11.3401	6.16587	0.000434369	0.0197338	0.0159163	358/947/3791/5175	4		DOID:74	hematopoietic system disease	11/85	349/7865	0.0315186	2.9164	3.82778	0.00125405	0.012627	0.00878518	64805/101/2323/57817/3553/355/2048/348/3162/22821/7852	11
C0524909	Hepatitis B, Chronic	15/178	415/21671	0.0361446	4.4005	6.36527	1.84802e-06	0.000128891	9.19227e-05	340061/57817/3106/9111/6275/3811/3135/3553/3804/6401/3105/348/3107/6890/151306	15		C0035222	Respiratory Distress Syndrome, Adult	8/91	434/21671	0.0184332	4.38973	4.63221	0.000483312	0.0215852	0.0174096	1003/358/7450/3791/1879/2078/857/7010	8		DOID:2921	glomerulonephritis	8/85	201/7865	0.039801	3.68276	4.02711	0.00141228	0.0139791	0.00972594	3553/355/1285/6401/348/7941/2889/6362	8
C0375359	Chronic left-sided ulcerative colitis	4/178	12/21671	0.333333	40.5824	12.4814	2.06909e-06	0.000141905	0.000101204	3553/355/5742/3383	4		C0020542	Pulmonary Hypertension	5/91	156/21671	0.0320513	7.63278	5.39898	0.000512273	0.0222708	0.0179625	1910/7450/5175/7048/857	5		DOID:1407	anterior uveitis	3/85	22/7865	0.136364	12.6176	5.70335	0.0016174	0.0157101	0.0109302	3106/3383/6362	3
C0024301	Lymphoma, Follicular	16/178	477/21671	0.033543	4.08376	6.19762	2.18226e-06	0.000147213	0.000104989	51237/216/526/3106/3811/5777/355/2048/6891/57379/3105/1118/970/567/338339/7852	16		C0235833	Congenital diaphragmatic hernia	6/91	239/21671	0.0251046	5.97848	5.02561	0.000515566	0.0222708	0.0179625	1910/54538/857/83595/7010/9754	6		DOID:1936	atherosclerosis	5/85	80/7865	0.0625	5.78309	4.49434	0.00166785	0.0157101	0.0109302	355/348/5360/7941/10062	5
C2931418	Bare lymphocyte syndrome 2	5/178	27/21671	0.185185	22.5458	10.1945	2.46405e-06	0.000163541	0.000116634	6891/3105/567/3107/6890	5		C0271084	Exudative age-related macular degeneration	5/91	158/21671	0.0316456	7.53617	5.35458	0.00054284	0.0230707	0.0186077	10186/7450/22918/3791/7010	5		DOID:2348	arteriosclerotic cardiovascular disease	5/85	80/7865	0.0625	5.78309	4.49434	0.00166785	0.0157101	0.0109302	355/348/5360/7941/10062	5
C0040425	Tonsillitis	6/178	48/21671	0.125	15.2184	8.97438	2.60127e-06	0.000167254	0.000119282	3106/6036/3811/3553/57379/3107	6		C0085580	Essential Hypertension	8/91	445/21671	0.0179775	4.28122	4.54157	0.000569707	0.0238282	0.0192187	2004/1910/10203/5175/4881/2701/7048/187	8		DOID:11394	adult respiratory distress syndrome	4/85	48/7865	0.0833333	7.71078	4.87433	0.00172152	0.0159582	0.0111029	3553/3162/3383/5698	4
C0265110	Cerebral Vasospasm	6/178	48/21671	0.125	15.2184	8.97438	2.60127e-06	0.000167254	0.000119282	10911/6275/3553/5742/348/3162	6		C0151529	Prolonged bleeding time	3/91	39/21671	0.0769231	18.3187	7.02948	0.000586735	0.024157	0.0194838	7450/54567/7010	3		DOID:0050847	sleep apnea	4/85	49/7865	0.0816327	7.55342	4.80967	0.00185927	0.0168363	0.0117138	3553/3162/3383/7941	4
C0015773	Felty Syndrome	4/178	13/21671	0.307692	37.4607	11.9668	2.96952e-06	0.000187993	0.000134073	355/6891/3105/3107	4		C0007112	Adenocarcinoma of prostate	7/91	342/21671	0.0204678	4.87427	4.68967	0.000596769	0.0241921	0.0195122	358/947/3791/221981/7048/2078/8611	7		DOID:0080000	muscular disease	12/85	424/7865	0.0283019	2.61876	3.58171	0.00188297	0.0168363	0.0117138	3134/246329/274/3106/3135/355/1286/1285/4624/3105/3133/3107	12
C0035078	Kidney Failure	14/178	378/21671	0.037037	4.50916	6.26356	3.11447e-06	0.000194183	0.000138487	51237/57817/10911/3106/5973/3553/1286/2048/1285/5742/8542/348/231/567	14		C3536893	Ewing Sarcoma/Peripheral Primitive Neuroectodermal Tumor	4/91	95/21671	0.0421053	10.0271	5.72595	0.000691968	0.0276263	0.022282	947/7048/2078/857	4		DOID:6000	congestive heart failure	9/85	261/7865	0.0344828	3.19067	3.76199	0.00193156	0.0168363	0.0117138	57817/10911/355/4624/348/3162/7941/8837/7852	9
C0497156	Lymphadenopathy	12/178	277/21671	0.0433213	5.27425	6.51545	3.30353e-06	0.000202896	0.000144701	3106/355/57379/64859/5696/115650/970/567/3383/338339/7852/5698	12		C1961121	Congenital vascular anomaly	3/91	42/21671	0.0714286	17.0102	6.74416	0.000730357	0.0286285	0.0230903	7450/5175/7010	3		DOID:9455	lipid storage disease	9/85	261/7865	0.0344828	3.19067	3.76199	0.00193156	0.0168363	0.0117138	57817/5660/3553/348/7941/2760/10062/3663/151306	9
C0677932	Progressive Neoplastic Disease	14/178	384/21671	0.0364583	4.4387	6.18719	3.73501e-06	0.000222747	0.000158859	10866/2323/3106/3135/3553/6401/3105/3133/348/567/3107/10062/6362/5008	14		C0242350	Erectile dysfunction	6/91	256/21671	0.0234375	5.58147	4.7884	0.0007388	0.0286285	0.0230903	1003/2004/7450/3791/4881/6886	6		DOID:0080600	COVID-19	5/85	83/7865	0.060241	5.57406	4.37862	0.00196413	0.0168684	0.0117361	3106/2512/3553/6401/3107	5
C3539781	Progressive cGVHD	14/178	384/21671	0.0364583	4.4387	6.18719	3.73501e-06	0.000222747	0.000158859	10866/2323/3106/3135/3553/6401/3105/3133/348/567/3107/10062/6362/5008	14		C0263218	Pyogenic granuloma of skin	2/91	10/21671	0.2	47.6286	9.57717	0.00076779	0.0293207	0.0236486	2324/3791	2		DOID:13025	retinopathy of prematurity	3/85	24/7865	0.125	11.5662	5.4185	0.00209288	0.0177136	0.0123242	3106/3553/3383	3
C0024534	Malaria, Cerebral	9/178	148/21671	0.0608108	7.40355	7.11362	3.82671e-06	0.000224956	0.000160434	1769/3106/3553/3804/6401/3162/3383/5698/55509	9		C0041956	Ureteral obstruction	7/91	359/21671	0.0194986	4.64345	4.52036	0.000793688	0.0298767	0.0240971	2494/1910/2324/3791/51705/5175/22915	7		DOID:2986	IgA glomerulonephritis	4/85	51/7865	0.0784314	7.25721	4.68566	0.00215735	0.0179985	0.0125224	3553/355/6401/7941	4
C0043124	West Nile Fever	7/178	79/21671	0.0886076	10.7877	7.93122	3.94819e-06	0.000228828	0.000163196	3811/3553/3105/115650/3107/6890/3663	7		C1536999	cancer angiogenesis	3/91	44/21671	0.0681818	16.237	6.5698	0.000837492	0.0310816	0.0250689	2324/3791/54567	3		DOID:2377	multiple sclerosis	6/85	128/7865	0.046875	4.33732	3.97885	0.00252921	0.0208037	0.0144741	3553/355/6891/7941/5698/3663	6
C0011633	Dermatomyositis	11/178	235/21671	0.0468085	5.6988	6.59083	4.09679e-06	0.000234143	0.000166986	340061/3106/3553/5742/6737/3105/1118/3383/3107/7852/3663	11		C0852949	Arteriopathic disease	4/91	101/21671	0.039604	9.4314	5.51518	0.000870647	0.0312467	0.0252021	7450/2701/857/22915	4		DOID:0070004	myeloid neoplasm	6/85	131/7865	0.0458015	4.23799	3.90616	0.0028406	0.021843	0.0151972	2323/3553/5777/348/567/3383	6
C1333064	Classical Hodgkin's Lymphoma	12/178	285/21671	0.0421053	5.1262	6.38114	4.42303e-06	0.000249325	0.000177814	3811/3135/355/2048/57379/3105/567/3107/8837/5698/3663/55509	12		C0339543	Epiretinal Membrane	4/91	102/21671	0.0392157	9.33894	5.48176	0.000903301	0.0312467	0.0252021	1910/947/187/22915	4		DOID:12894	Sjogren's syndrome	4/85	55/7865	0.0727273	6.72941	4.45664	0.00284959	0.021843	0.0151972	355/348/3162/3383	4
C0002874	Aplastic Anemia	11/178	238/21671	0.0462185	5.62697	6.53183	4.62543e-06	0.000257212	0.000183438	57817/3106/3811/3553/355/3105/970/567/3383/22821/7852	11		C0024214	Lymphangiectasis	2/91	11/21671	0.181818	43.2987	9.1121	0.000935847	0.0312467	0.0252021	2324/3791	2		DOID:1883	hepatitis C	4/85	55/7865	0.0727273	6.72941	4.45664	0.00284959	0.021843	0.0151972	3811/3135/3553/3663	4
C0020557	Hypertriglyceridemia	13/178	340/21671	0.0382353	4.65504	6.18183	5.02514e-06	0.000275713	0.000196633	341/3553/2048/5696/348/231/5360/3383/7941/10062/5008/5698/1071	13		C0034091	Pulmonary Veno-Occlusive Disease (disorder)	2/91	11/21671	0.181818	43.2987	9.1121	0.000935847	0.0312467	0.0252021	187/2078	2		DOID:5199	ureteral obstruction	4/85	55/7865	0.0727273	6.72941	4.45664	0.00284959	0.021843	0.0151972	3553/567/3383/3663	4
C0282193	Iron Overload	11/178	241/21671	0.0456432	5.55693	6.47382	5.21278e-06	0.000282245	0.000201291	57817/3106/2512/2048/3105/1118/348/3162/567/3383/6362	11		C0280745	secondary myelodysplastic syndromes	2/91	11/21671	0.181818	43.2987	9.1121	0.000935847	0.0312467	0.0252021	947/2122	2		DOID:1205	allergic disease	3/85	27/7865	0.111111	10.281	5.04914	0.00295479	0.021843	0.0151972	231/3383/6890	3
C3469186	HEMOCHROMATOSIS, TYPE 1	7/178	83/21671	0.0843373	10.2678	7.69843	5.50126e-06	0.000293996	0.000209672	3134/57817/3106/2512/3105/348/567	7		C0340630	Aortic Aneurysm, Thoracoabdominal	2/91	11/21671	0.181818	43.2987	9.1121	0.000935847	0.0312467	0.0252021	54538/7048	2		DOID:1532	pleural disease	3/85	27/7865	0.111111	10.281	5.04914	0.00295479	0.021843	0.0151972	3553/3162/3383	3
C0220597	Adult Hodgkin Lymphoma	14/178	399/21671	0.0350877	4.27183	6.00294	5.79349e-06	0.000305644	0.000217979	57817/3811/3135/355/57379/3105/970/7293/3383/8837/7852/5698/3663/55509	14		C3665732	Metastatic Dermatofibrosarcoma Protuberans	2/91	11/21671	0.181818	43.2987	9.1121	0.000935847	0.0312467	0.0252021	947/2078	2		DOID:1927	sphingolipidosis	3/85	27/7865	0.111111	10.281	5.04914	0.00295479	0.021843	0.0151972	5660/348/2760	3
C0013238	Dry Eye Syndromes	9/178	156/21671	0.0576923	7.02388	6.87161	5.8866e-06	0.000306625	0.000218679	51237/57817/7114/3553/6737/5360/3383/3107/5008	9		C0028840	Ocular Hypertension	4/91	103/21671	0.038835	9.24827	5.4488	0.00093681	0.0312467	0.0252021	1910/2324/857/7010	4		DOID:627	severe combined immunodeficiency	3/85	27/7865	0.111111	10.281	5.04914	0.00295479	0.021843	0.0151972	6891/6890/6892	3
C0949690	Spondylarthritis	9/178	158/21671	0.056962	6.93497	6.81377	6.52959e-06	0.000335866	0.000239533	3106/3811/3553/355/3105/567/3107/7850/5698	9		C0086692	Benign Neoplasm	7/91	371/21671	0.0188679	4.49326	4.4071	0.0009613	0.0316628	0.0255377	358/1910/3791/221981/2122/64321/2078	7		DOID:9744	type 1 diabetes mellitus	7/85	180/7865	0.0388889	3.59837	3.68601	0.00321564	0.0234742	0.0163321	3553/355/6891/6401/348/3383/6890	7
C0024314	Lymphoproliferative Disorders	12/178	300/21671	0.04	4.86989	6.14239	7.44789e-06	0.000378371	0.000269847	3106/3811/3135/355/57379/3804/3105/115650/970/3383/338339/7852	12		C0154830	Proliferative diabetic retinopathy	5/91	180/21671	0.0277778	6.61508	4.91234	0.000976865	0.0317783	0.0256308	7450/3791/54538/187/8639	5		DOID:12030	panuveitis	3/85	28/7865	0.107143	9.91387	4.93869	0.00328375	0.0236754	0.0164721	3106/3383/6362	3
C0026948	Mycosis Fungoides	11/178	251/21671	0.0438247	5.33553	6.28725	7.66757e-06	0.000384781	0.000274418	7471/3106/3135/3553/355/2048/3105/7293/567/8837/7852	11		C0007124	Noninfiltrating Intraductal Carcinoma	8/91	486/21671	0.0164609	3.92005	4.22784	0.00100854	0.0318738	0.0257079	2494/7450/947/5175/4855/2078/857/7075	8		DOID:848	arthritis	8/85	231/7865	0.034632	3.20448	3.55449	0.00337096	0.0238199	0.0165726	3106/3553/355/6891/567/7941/6890/3663	8
C1562585	Leprosy, Multibacillary	5/178	34/21671	0.147059	17.904	8.9768	8.10665e-06	0.000401914	0.000286637	3811/6401/3105/348/3383	5		C0016529	Forced expiratory volume function	6/91	272/21671	0.0220588	5.25315	4.58377	0.0010112	0.0318738	0.0257079	2494/221981/134265/1879/79772/2122	6		DOID:9538	multiple myeloma	5/85	94/7865	0.0531915	4.92178	3.99806	0.00338536	0.0238199	0.0165726	2323/3553/348/567/3383	5
C0009447	Common Variable Immunodeficiency	10/178	207/21671	0.0483092	5.88151	6.42206	8.59957e-06	0.000421277	0.000300446	3106/3811/355/57379/113/3105/115650/1118/970/3107	10		C4551858	Vesicoureteral Reflux 1	3/91	47/21671	0.0638298	15.2006	6.32867	0.00101609	0.0318738	0.0257079	947/64321/7148	3		DOID:0111962	combined immunodeficiency	4/85	58/7865	0.0689655	6.38134	4.29936	0.00345909	0.0240489	0.016732	6891/7293/6890/6892	4
C0206138	CREST Syndrome	6/178	59/21671	0.101695	12.3811	7.96623	8.86338e-06	0.000429092	0.00030602	3106/355/6891/6890/6362/3663	6		C0577608	C4 complement assay (procedure)	2/91	12/21671	0.166667	39.6905	8.70562	0.00111995	0.0339203	0.0273585	4855/7148	2		DOID:1575	rheumatic disease	5/85	96/7865	0.0520833	4.81924	3.93524	0.00370701	0.0251732	0.0175141	3553/6891/3105/3383/6890	5
C0040561	Ocular Toxoplasmosis	5/178	35/21671	0.142857	17.3925	8.83244	9.39511e-06	0.000446192	0.000318215	3106/3811/3553/3804/3107	5		C3840252	Pseudomyogenic (epithelioid sarcoma-like) hemangioendothelioma	2/91	12/21671	0.166667	39.6905	8.70562	0.00111995	0.0339203	0.0273585	947/5175	2		DOID:419	scleroderma	5/85	96/7865	0.0520833	4.81924	3.93524	0.00370701	0.0251732	0.0175141	3553/6891/3105/3383/6890	5
C0029118	Opportunistic Infections	7/178	90/21671	0.0777778	9.46923	7.3269	9.43345e-06	0.000446192	0.000318215	57817/3811/3135/355/57379/3105/348	7		C3888044	Nephrogenic Systemic Fibrosis	2/91	12/21671	0.166667	39.6905	8.70562	0.00111995	0.0339203	0.0273585	947/857	2		DOID:1107	esophageal carcinoma	6/85	139/7865	0.0431655	3.99408	3.7225	0.00381172	0.0255867	0.0178019	355/6891/5742/6890/7852/5698	6
C0543698	Hypersensitive syndrome	4/178	17/21671	0.235294	28.6464	10.3773	9.63358e-06	0.000450479	0.000321273	3106/3105/348/3107	4		C0009782	Connective Tissue Diseases	5/91	188/21671	0.0265957	6.33359	4.76953	0.00118556	0.0346401	0.027939	7450/947/7048/7148/22915	5		DOID:5200	urinary tract obstruction	4/85	60/7865	0.0666667	6.16863	4.20055	0.00391136	0.0259094	0.0180264	3553/567/3383/3663	4
C0030805	Bullous pemphigoid	8/178	127/21671	0.0629921	7.66911	6.85958	1.03308e-05	0.000477656	0.000340655	6036/3553/355/2048/6401/3383/3107/6362	8		C0042345	Varicosity	5/91	188/21671	0.0265957	6.33359	4.76953	0.00118556	0.0346401	0.027939	2324/3791/1879/54567/22915	5		DOID:3213	demyelinating disease	6/85	140/7865	0.0428571	3.96555	3.7005	0.00394853	0.0259094	0.0180264	3553/355/6891/7941/5698/3663	6
C0520679	Sleep Apnea, Obstructive	15/178	480/21671	0.03125	3.8046	5.65466	1.0693e-05	0.000488909	0.00034868	57817/3106/6036/3553/355/5742/6401/1118/348/3162/3383/7941/7850/5008/2358	15		C0243038	Carcinoma, Lewis Lung	5/91	188/21671	0.0265957	6.33359	4.76953	0.00118556	0.0346401	0.027939	57381/3791/5175/54538/54567	5		DOID:784	chronic kidney disease	7/85	191/7865	0.0366492	3.39113	3.49664	0.00445969	0.0289384	0.0201338	57817/3553/1286/1285/348/3383/7941	7
C0403396	Steroid-sensitive nephrotic syndrome	5/178	36/21671	0.138889	16.9093	8.69392	1.08382e-05	0.0004901	0.00034953	3106/3105/8542/7941/5336	5		C0206701	Cystadenocarcinoma, Serous	4/91	110/21671	0.0363636	8.65974	5.22998	0.0011963	0.0346401	0.027939	2494/358/83595/7148	4		DOID:3211	lysosomal storage disease	9/85	297/7865	0.030303	2.80392	3.31243	0.00458712	0.0294382	0.0204815	57817/5660/3553/348/7941/2760/10062/3663/151306	9
C0153452	Malignant neoplasm of gallbladder	14/178	425/21671	0.0329412	4.0105	5.70407	1.18228e-05	0.000518711	0.000369934	216/5660/3106/2014/3553/355/2048/3105/348/567/3107/8837/6362/1071	14		C0085653	Pyogenic granuloma	2/91	13/21671	0.153846	36.6374	8.34627	0.00131996	0.0369381	0.0297925	2324/3791	2		DOID:8566	herpes simplex	2/85	10/7865	0.2	18.5059	5.78965	0.00491022	0.0308341	0.0214527	348/3663	2
C0019372	Herpesviridae Infections	6/178	62/21671	0.0967742	11.782	7.73692	1.1849e-05	0.000518711	0.000369934	3106/3811/3135/3553/3105/3107	6		C0280725	Adult Cholangiocarcinoma	2/91	13/21671	0.153846	36.6374	8.34627	0.00131996	0.0369381	0.0297925	7048/64321	2		DOID:988	mitral valve prolapse	2/85	10/7865	0.2	18.5059	5.78965	0.00491022	0.0308341	0.0214527	3106/7253	2
C0263666	Dermatomyositis, Childhood Type	6/178	62/21671	0.0967742	11.782	7.73692	1.1849e-05	0.000518711	0.000369934	3106/3553/6737/3105/6362/5336	6		C1619692	Nephrogenic Fibrosing Dermopathy	2/91	13/21671	0.153846	36.6374	8.34627	0.00131996	0.0369381	0.0297925	947/857	2		DOID:10241	thalassemia	3/85	33/7865	0.0909091	8.41176	4.45947	0.00526078	0.032684	0.0227398	57817/3553/348	3
C0087031	Juvenile-Onset Still Disease	9/178	171/21671	0.0526316	6.40775	6.4608	1.23645e-05	0.000535577	0.000381963	3106/1844/3553/355/113/54757/7852/5008/6892	9		C0027809	Neurilemmoma	5/91	193/21671	0.0259067	6.1695	4.68441	0.00133173	0.0369381	0.0297925	947/3791/221981/7010/7075	5		DOID:9452	steatotic liver disease	7/85	198/7865	0.0353535	3.27124	3.38318	0.0054226	0.0333347	0.0231925	57817/3553/348/7941/10062/3663/151306	7
C0023348	Leprosy, Lepromatous	7/178	94/21671	0.0744681	9.06628	7.13235	1.25728e-05	0.000538929	0.000384353	3384/3811/3553/6401/3162/3383/6362	7		C0751955	Brain Infarction	4/91	114/21671	0.0350877	8.35589	5.1135	0.00136524	0.0374731	0.0302239	358/2324/5175/187	4		DOID:0060058	lymphoma	5/85	106/7865	0.0471698	4.36459	3.64522	0.0056517	0.0340268	0.023674	526/355/3383/7852/5698	5
C0009326	Collagen Diseases	6/178	63/21671	0.0952381	11.595	7.66397	1.30077e-05	0.000551823	0.000393549	3106/3553/6737/6401/3107/5698	6		C0023453	L2 Acute Lymphoblastic Leukemia	3/91	53/21671	0.0566038	13.4798	5.90693	0.00144154	0.0391594	0.0315841	947/2078/6886	3		DOID:3021	acute kidney failure	5/85	106/7865	0.0471698	4.36459	3.64522	0.0056517	0.0340268	0.023674	3553/355/3162/567/3383	5
C0577631	Carotid Atherosclerosis	10/178	219/21671	0.0456621	5.55923	6.17122	1.40558e-05	0.000590199	0.000420919	1844/3553/6401/22846/348/231/3162/3383/7941/1071	10		C0012739	Disseminated Intravascular Coagulation	4/91	117/21671	0.034188	8.14164	5.0298	0.00150241	0.0391971	0.0316145	7450/947/7010/6886	4		DOID:11162	respiratory failure	4/85	67/7865	0.0597015	5.52414	3.88708	0.00580716	0.0346059	0.024077	3553/3162/3383/5698	4
C0343723	Neonatal chlamydial conjunctivitis	5/178	38/21671	0.131579	16.0194	8.43288	1.42399e-05	0.000591892	0.000422126	3106/3553/3804/3105/3107	5		C0085109	Corneal Neovascularization	4/91	117/21671	0.034188	8.14164	5.0298	0.00150241	0.0391971	0.0316145	1910/3791/5175/7010	4		DOID:8947	diabetic retinopathy	6/85	152/7865	0.0394737	3.65248	3.45146	0.00588873	0.0347375	0.0241685	10911/3106/3553/348/231/3383	6
C0031069	Familial Mediterranean Fever	8/178	133/21671	0.0601504	7.32314	6.65651	1.44841e-05	0.00059602	0.00042507	340061/3811/3135/3553/6737/57379/1118/3107	8		C0856825	Acute GVH disease	6/91	294/21671	0.0204082	4.86006	4.32732	0.00150481	0.0391971	0.0316145	1901/2324/7450/947/5175/857	6		DOID:0050830	peripheral artery disease	2/85	11/7865	0.181818	16.8235	5.48903	0.00595941	0.034803	0.024214	64805/567	2
C0268731	Renal glomerular disease	10/178	221/21671	0.0452489	5.50892	6.13121	1.52074e-05	0.000617128	0.000440124	3106/3553/355/1286/2048/1285/5742/8542/348/231	10		C1370889	Liposarcoma, well differentiated	3/91	54/21671	0.0555556	13.2302	5.84327	0.00152173	0.0391971	0.0316145	8436/947/857	3		DOID:170	endocrine gland cancer	9/85	317/7865	0.0283912	2.62702	3.09063	0.00697751	0.0403452	0.02807	101/2323/216/341/3553/348/3383/7852/5698	9
C0020097	HTLV-I Infections	8/178	134/21671	0.0597015	7.26849	6.6239	1.5297e-05	0.000617128	0.000440124	3135/3553/5777/355/970/7293/3383/3107	8		C3489413	Lipomatosis, Multiple	3/91	54/21671	0.0555556	13.2302	5.84327	0.00152173	0.0391971	0.0316145	1003/10186/947	3		DOID:2462	retinal vascular disease	6/85	161/7865	0.0372671	3.4483	3.28066	0.00774567	0.0442733	0.030803	10911/3106/3553/348/231/3383	6
C0948192	Primary infection NOS	6/178	65/21671	0.0923077	11.2382	7.52288	1.55999e-05	0.000623238	0.000444481	3106/7253/140691/3811/3553/7852	6		C4288892	Infant Acute Undifferentiated Leukemia	2/91	14/21671	0.142857	34.0204	8.02549	0.00153576	0.0391971	0.0316145	947/2078	2		DOID:5082	liver cirrhosis	7/85	212/7865	0.0330189	3.05522	3.17067	0.00780848	0.0442733	0.030803	57817/3553/355/22846/3162/3383/3663	7
C0024140	Lupus Erythematosus, Subacute Cutaneous	5/178	39/21671	0.128205	15.6086	8.30967	1.62259e-05	0.000635901	0.000453512	3553/6737/3105/970/3663	5		C0149721	Left Ventricular Hypertrophy	7/91	403/21671	0.0173697	4.13648	4.1272	0.00154706	0.0391971	0.0316145	5136/947/5175/4881/187/857/5138	7		DOID:341	peripheral vascular disease	4/85	74/7865	0.0540541	5.00159	3.61487	0.00823528	0.0462443	0.0321743	3553/355/3105/3383	4
C0040592	Trachoma	5/178	39/21671	0.128205	15.6086	8.30967	1.62259e-05	0.000635901	0.000453512	3106/3553/3804/3105/3107	5		C0035126	Reperfusion Injury	6/91	300/21671	0.02	4.76286	4.26177	0.00166684	0.0418297	0.0337378	1910/3791/5175/7048/857/8639	6		DOID:61	mitral valve disease	2/85	13/7865	0.153846	14.2353	4.99179	0.0083339	0.0463523	0.0322495	3106/7253	2
C0035455	Rhinitis	9/178	178/21671	0.0505618	6.15576	6.28557	1.7038e-05	0.000661428	0.000471717	3106/3135/3553/51314/3105/231/3162/3383/3107	9		C0014867	Esophageal Varices	3/91	56/21671	0.0535714	12.7577	5.72086	0.00169037	0.0420202	0.0338914	7450/3791/54567	3		DOID:535	sleep disorder	4/85	75/7865	0.0533333	4.9349	3.5788	0.00862888	0.0475402	0.0330759	3553/3162/3383/7941	4
C0546126	Acute Confusional Senile Dementia	7/178	99/21671	0.0707071	8.60839	6.90488	1.76673e-05	0.000673156	0.000480081	274/341/3553/348/3162/5336/54209	7		C0278619	Extramedullary Plasmacytoma	2/91	15/21671	0.133333	31.7524	7.73677	0.00176719	0.0426127	0.0343693	5175/7010	2		DOID:9352	type 2 diabetes mellitus	11/85	450/7865	0.0244444	2.26183	2.88133	0.00876197	0.0478224	0.0332722	64805/10911/341/3553/348/231/3162/567/3383/7941/10062	11
C0750900	Alzheimer's Disease, Focal Onset	7/178	99/21671	0.0707071	8.60839	6.90488	1.76673e-05	0.000673156	0.000480081	274/341/3553/348/3162/5336/54209	7		C1257840	Aganglionosis, Rectosigmoid Colon	2/91	15/21671	0.133333	31.7524	7.73677	0.00176719	0.0426127	0.0343693	1910/8436	2
C0038325	Stevens-Johnson Syndrome	6/178	67/21671	0.0895522	10.9027	7.38782	1.85937e-05	0.000701956	0.000500621	10866/3106/355/3105/231/3107	6		C0040420	Tonometry	5/91	206/21671	0.0242718	5.78017	4.47647	0.00177391	0.0426127	0.0343693	221981/51705/7048/2122/7148	5
C0494463	Alzheimer Disease, Late Onset	13/178	385/21671	0.0337662	4.11094	5.60488	1.88851e-05	0.000706476	0.000503845	274/341/3553/355/51314/27181/3105/348/3162/7941/5336/1071/54209	13		C0339467	Proliferative retinopathy	3/91	57/21671	0.0526316	12.5338	5.66198	0.0017789	0.0426127	0.0343693	358/7450/4881	3
C0151450	Secondary SjC6gren's syndrome	4/178	20/21671	0.2	24.3494	9.507	1.92369e-05	0.000713151	0.000508605	6737/6401/3105/3383	4		C1134719	Invasive Ductal Breast Carcinoma	7/91	414/21671	0.0169082	4.02657	4.03761	0.00180256	0.0426243	0.0343787	2494/7450/947/5175/4855/857/22915	7
C0852949	Arteriopathic disease	7/178	101/21671	0.0693069	8.43792	6.81833	2.01327e-05	0.000739699	0.000527538	6275/5973/6401/8542/348/7941/1071	7		C0947751	Vascular inflammations	6/91	305/21671	0.0196721	4.68478	4.20847	0.00181174	0.0426243	0.0343787	1901/7450/5175/857/54567/7010	6
C1609538	Latent Tuberculosis	9/178	183/21671	0.0491803	5.98757	6.16605	2.12312e-05	0.000773153	0.000551398	340061/57817/3811/3553/5696/3105/3133/7852/5698	9		C0162429	Malnutrition	7/91	417/21671	0.0167866	3.9976	4.01371	0.00187764	0.0437839	0.035314	2004/1910/7450/6578/5175/9457/187	7
C0017668	Focal glomerulosclerosis	11/178	281/21671	0.0391459	4.7659	5.7824	2.19987e-05	0.000794075	0.000566319	6275/3553/1286/2048/1285/3105/8542/348/3162/567/7852	11		C0005818	Blood Platelet Disorders	3/91	59/21671	0.0508475	12.109	5.54851	0.00196452	0.044687	0.0360424	7450/947/22915	3
C0037023	Sialadenitis	5/178	42/21671	0.119048	14.4937	7.96579	2.35006e-05	0.00083528	0.000595705	6737/57379/7852/5008/2358	5		C0017667	Nodular glomerulosclerosis	3/91	59/21671	0.0508475	12.109	5.54851	0.00196452	0.044687	0.0360424	3791/7048/8639	3
C1519680	Tumor Immunity	12/178	337/21671	0.0356083	4.33521	5.61556	2.37167e-05	0.00083528	0.000595705	340061/3135/3553/2048/970/7293/567/3383/8837/3663/2358/55509	12		C0007766	Intracranial Aneurysm	6/91	311/21671	0.0192926	4.5944	4.14601	0.00199803	0.044687	0.0360424	1003/55901/3791/7048/64321/8639	6
C0007820	Cerebrovascular Disorders	10/178	233/21671	0.0429185	5.2252	5.90098	2.39719e-05	0.00083528	0.000595705	246329/3553/6401/8542/348/3162/3383/7941/1071/54209	10		C0027686	Pathologic Neovascularization	2/91	16/21671	0.125	29.7679	7.47503	0.00201414	0.044687	0.0360424	3791/7010	2
C2347747	Adult Classical Hodgkin Lymphoma	10/178	233/21671	0.0429185	5.2252	5.90098	2.39719e-05	0.00083528	0.000595705	3135/355/2048/57379/3105/567/3107/5698/3663/55509	10		C1511566	cutaneous B-cell non-Hodgkin lymphoma	2/91	16/21671	0.125	29.7679	7.47503	0.00201414	0.044687	0.0360424	947/7010	2
C0019621	Histiocytosis, Langerhans-Cell	7/178	104/21671	0.0673077	8.19452	6.69291	2.43581e-05	0.00083528	0.000595705	2323/3553/5777/2048/3105/3640/8837	7		C0019214	Hepatosplenomegaly	4/91	127/21671	0.0314961	7.50056	4.77105	0.00202882	0.044687	0.0360424	57381/7450/2122/857	4
C0149745	Oral Ulcer	7/178	104/21671	0.0673077	8.19452	6.69291	2.43581e-05	0.00083528	0.000595705	3106/3811/355/6891/3105/6890/5698	7		C0006287	Bronchopulmonary Dysplasia	7/91	423/21671	0.0165485	3.9409	3.96657	0.00203508	0.044687	0.0360424	947/3791/5175/90952/9457/6330/54567	7
C0220644	Childhood Hodgkin Lymphoma	13/178	399/21671	0.0325815	3.9667	5.44311	2.74025e-05	0.000931911	0.000664621	3811/3135/355/57379/3105/970/7293/3383/8837/7852/5698/3663/55509	13		C0014733	Erysipelas	2/91	17/21671	0.117647	28.0168	7.23625	0.00227647	0.048375	0.0390169	2324/79633	2
C4275242	Sudden sensorineural hearing loss	6/178	72/21671	0.0833333	10.1456	7.0738	2.81397e-05	0.000949137	0.000676906	3106/3553/6401/3105/348/3383	6		C0333209	Platelet thrombus	2/91	17/21671	0.117647	28.0168	7.23625	0.00227647	0.048375	0.0390169	7450/2701	2
C4721555	Autoimmune hepatitis	9/178	190/21671	0.0473684	5.76697	6.00597	2.8554e-05	0.000951539	0.000678619	57817/3106/7253/3811/3553/355/6737/3105/3107	9		C1318312	Serum iron measurement	2/91	17/21671	0.117647	28.0168	7.23625	0.00227647	0.048375	0.0390169	4855/2078	2
C0014236	Endophthalmitis	4/178	22/21671	0.181818	22.1359	9.02616	2.86734e-05	0.000951539	0.000678619	140691/3553/355/6362	4		C4551482	Adams-Oliver syndrome 1	2/91	17/21671	0.117647	28.0168	7.23625	0.00227647	0.048375	0.0390169	7048/54567	2
C0025289	Meningitis	9/178	191/21671	0.0471204	5.73678	5.98375	2.9757e-05	0.000974401	0.000694924	2995/3106/3135/3553/355/3105/115650/3383/7852	9		C0023892	Biliary cirrhosis	4/91	132/21671	0.030303	7.21645	4.65201	0.00233464	0.0492141	0.0396937	1003/7048/857/53919	4
C0038002	Splenomegaly	12/178	345/21671	0.0347826	4.23468	5.5116	2.98359e-05	0.000974401	0.000694924	2995/57817/5660/526/3106/355/5696/115650/348/7293/567/5698	12		C0004245	Atrioventricular Block	3/91	63/21671	0.047619	11.3401	5.3372	0.00237091	0.0495822	0.0399906	2324/6330/857	3
C0867389	Chronic graft-versus-host disease	10/178	241/21671	0.0414938	5.05175	5.75614	3.19693e-05	0.00103585	0.000738751	3106/23526/3811/3553/6737/6401/3105/3133/3383/3107	10
C0314719	Dryness of eye	8/178	149/21671	0.0536913	6.53676	6.17161	3.29201e-05	0.00105404	0.00075172	51237/57817/7114/3553/6737/3383/3107/5008	8
C0042384	Vasculitis	11/178	294/21671	0.037415	4.55517	5.58536	3.32989e-05	0.00105404	0.00075172	340061/57817/3106/27143/3553/355/115650/231/3383/3107/3663	11
C0856825	Acute GVH disease	11/178	294/21671	0.037415	4.55517	5.58536	3.32989e-05	0.00105404	0.00075172	3106/23526/3811/3135/3553/3105/3133/3162/3383/3107/6892	11
C0027697	Nephritis	11/178	296/21671	0.0371622	4.52439	5.55607	3.542e-05	0.00111262	0.000793498	57817/3106/3553/355/1286/1285/5742/3105/567/3383/151306	11
C0035435	Rheumatism	9/178	197/21671	0.0456853	5.56205	5.85367	3.7916e-05	0.001182	0.000842981	3106/3135/3553/355/6737/3162/3107/5698/3663	9
C0003862	Arthralgia	10/178	248/21671	0.0403226	4.90916	5.63456	4.07426e-05	0.00125342	0.000893914	3106/2512/3553/355/5696/115650/5698/3663/5336/54209	10
C0242583	Bare Lymphocyte Syndrome	4/178	24/21671	0.166667	20.2912	8.60512	4.11207e-05	0.00125342	0.000893914	3105/567/3107/6890	4
C3826758	AIDS (Disease)	4/178	24/21671	0.166667	20.2912	8.60512	4.11207e-05	0.00125342	0.000893914	348/6890/7852/6362	4
C0220756	Niemann-Pick Disease, Type C	9/178	201/21671	0.0447761	5.45137	5.76987	4.43472e-05	0.00134183	0.000956966	3553/5777/3105/1118/348/567/6362/5008/5698	9
C0020445	Hypercholesterolemia, Familial	9/178	203/21671	0.044335	5.39766	5.72881	4.78939e-05	0.00143856	0.00102596	3553/57379/6401/115650/8542/348/3383/7941/1071	9
C0149516	Chronic sinusitis	9/178	205/21671	0.0439024	5.345	5.68829	5.16773e-05	0.00154096	0.00109898	6036/3553/51314/6891/5742/6401/3383/6890/6892	9
C0751967	Multiple Sclerosis, Relapsing-Remitting	9/178	206/21671	0.0436893	5.31905	5.66823	5.36616e-05	0.0015501	0.0011055	3811/3135/3553/355/6891/5696/3105/348/3383	9
C4525297	Stage 0 Gallbladder Cancer AJCC v8	12/178	367/21671	0.0326975	3.98083	5.24121	5.4244e-05	0.0015501	0.0011055	216/5660/3106/2014/355/2048/3105/567/3107/8837/6362/1071	12
C4525300	Stage IIA Gallbladder Cancer AJCC v8	12/178	367/21671	0.0326975	3.98083	5.24121	5.4244e-05	0.0015501	0.0011055	216/5660/3106/2014/355/2048/3105/567/3107/8837/6362/1071	12
C4525301	Stage IIB Gallbladder Cancer AJCC v8	12/178	367/21671	0.0326975	3.98083	5.24121	5.4244e-05	0.0015501	0.0011055	216/5660/3106/2014/355/2048/3105/567/3107/8837/6362/1071	12
C4525302	Stage III Gallbladder Cancer AJCC v8	12/178	367/21671	0.0326975	3.98083	5.24121	5.4244e-05	0.0015501	0.0011055	216/5660/3106/2014/355/2048/3105/567/3107/8837/6362/1071	12
C4525305	Stage IV Gallbladder Cancer AJCC v8	12/178	367/21671	0.0326975	3.98083	5.24121	5.4244e-05	0.0015501	0.0011055	216/5660/3106/2014/355/2048/3105/567/3107/8837/6362/1071	12
C0279671	Cervical Squamous Cell Carcinoma	12/178	371/21671	0.032345	3.93791	5.1943	6.01742e-05	0.0017077	0.0012179	216/3106/3135/355/6401/5696/3105/22846/348/6890/8837/5698	12
C0014743	Erythema Nodosum	5/178	51/21671	0.0980392	11.936	7.11552	6.11347e-05	0.00171135	0.0012205	3106/3553/6401/5696/4065	5
C1334968	Nodular Lymphocyte Predominant Hodgkin Lymphoma	5/178	51/21671	0.0980392	11.936	7.11552	6.11347e-05	0.00171135	0.0012205	1844/2048/57379/3383/8837	5
C0267750	Acute peritonitis	3/178	10/21671	0.3	36.5242	10.2253	6.26701e-05	0.00174248	0.0012427	1769/3553/3383	3
C0002895	Anemia, Sickle Cell	13/178	434/21671	0.0299539	3.64681	5.06887	6.48142e-05	0.00177807	0.00126808	57817/3135/3553/355/6737/6401/3105/1118/3133/8542/348/3162/3383	13
C3241937	Nonalcoholic Steatohepatitis	13/178	434/21671	0.0299539	3.64681	5.06887	6.48142e-05	0.00177807	0.00126808	57817/216/140691/3553/355/1118/348/231/7293/8837/7852/151306/1071	13
C0566602	Primary sclerosing cholangitis	10/178	264/21671	0.0378788	4.61164	5.37303	6.88049e-05	0.00185797	0.00132507	57817/3106/3553/84870/57379/3105/3383/3107/8837/151306	10
C0241910	Autoimmune Chronic Hepatitis	9/178	213/21671	0.0422535	5.14425	5.53136	6.94362e-05	0.00185797	0.00132507	57817/3106/7253/3811/3553/355/6737/3105/3107	9
C0007682	CNS disorder	11/178	319/21671	0.0344828	4.19818	5.23685	6.95327e-05	0.00185797	0.00132507	101/7253/3553/5777/4245/348/3162/3383/7852/54209/2358	11
C0206062	Lung Diseases, Interstitial	11/178	319/21671	0.0344828	4.19818	5.23685	6.95327e-05	0.00185797	0.00132507	340061/3384/3106/3553/355/6737/1118/3383/7852/6362/3663	11
C0032914	Pre-Eclampsia	8/178	166/21671	0.0481928	5.86733	5.72884	7.08298e-05	0.00188042	0.00134108	23526/3135/6891/5742/6401/3162/3383/6890	8
C0038826	Superinfection	6/178	85/21671	0.0705882	8.59392	6.38382	7.21304e-05	0.00190267	0.00135695	2323/3106/3553/3105/3107/7852	6
C0234251	Inflammatory pain	10/178	266/21671	0.037594	4.57696	5.34181	7.32593e-05	0.00192014	0.00136941	64805/51237/3106/1844/3553/5777/2048/4245/3162/7852	10
C0494261	Combined immunodeficiency	6/178	86/21671	0.0697674	8.49399	6.33691	7.70171e-05	0.00200586	0.00143054	57379/3105/970/7293/567/3107	6
C0238190	Inclusion Body Myositis (disorder)	6/178	87/21671	0.0689655	8.39636	6.29075	8.21642e-05	0.00212581	0.00151608	5699/3553/2048/6737/348/3107	6
C0221056	Adult type dermatomyositis	9/178	218/21671	0.0412844	5.02626	5.43722	8.29528e-05	0.00212581	0.00151608	340061/3106/3553/5742/6737/3105/1118/3107/7852	9
C0085580	Essential Hypertension	13/178	445/21671	0.0292135	3.55666	4.95918	8.3382e-05	0.00212581	0.00151608	10911/3106/6036/5973/6368/6401/3105/8542/348/231/7293/3162/7941	13
C0242510	Drug usage	8/178	170/21671	0.0470588	5.72928	5.63354	8.3689e-05	0.00212581	0.00151608	3106/3553/5742/6401/116071/348/231/7852	8
C4014733	Follicular hyperplasia	3/178	11/21671	0.272727	33.2038	9.72221	8.56508e-05	0.00216229	0.0015421	340061/355/115650	3
C0741796	Recurrent bronchitis	4/178	29/21671	0.137931	16.7927	7.74458	8.90122e-05	0.00223345	0.00159285	6891/115650/6890/6892	4
C1719495	Aggressive periodontitis, generalized	5/178	56/21671	0.0892857	10.8703	6.73034	9.61722e-05	0.00239848	0.00171055	3106/3553/6401/3105/348	5
C0017658	Glomerulonephritis	12/178	391/21671	0.0306905	3.73649	4.9692	9.89956e-05	0.00244605	0.00174447	3553/355/1285/6737/6401/3105/8542/348/231/3383/7852/3663	12
C0701807	Acute anterior uveitis	6/178	90/21671	0.0666667	8.11648	6.15661	9.92685e-05	0.00244605	0.00174447	3106/3811/3553/3105/5698/3663	6
C0276501	Human immunodeficiency virus II infection	4/178	30/21671	0.133333	16.233	7.59796	0.00010205	0.00248484	0.00177214	3106/3811/3162/8837	4
C0854094	HIV-2 infection	4/178	30/21671	0.133333	16.233	7.59796	0.00010205	0.00248484	0.00177214	3106/3811/3162/8837	4
C0023492	Leukemia, T-Cell	13/178	457/21671	0.0284464	3.46327	4.84339	0.000108739	0.00263213	0.00187719	3106/6275/7114/3553/5777/355/2048/57379/3105/7293/3383/115727/7852	13
C0024790	Paroxysmal nocturnal hemoglobinuria	7/178	132/21671	0.0530303	6.45629	5.72219	0.000111482	0.00268275	0.00191328	2323/3811/3553/355/3105/3107/7852	7
C1142272	Neutrophilic dermatosis	3/178	12/21671	0.25	30.4368	9.28224	0.000113511	0.00270798	0.00193128	3553/5777/5696	3
C0021345	Infectious Mononucleosis	5/178	58/21671	0.0862069	10.4954	6.58966	0.000113847	0.00270798	0.00193128	3106/3811/3553/3105/5698	5
C0154830	Proliferative diabetic retinopathy	8/178	180/21671	0.0444444	5.41099	5.40797	0.000124519	0.0029448	0.00210017	3106/7114/3553/348/231/3162/3383/7941	8
C3853540	Aspirin exacerbated respiratory disease	6/178	94/21671	0.0638298	7.7711	5.98713	0.000126353	0.00297109	0.00211892	3553/6891/5742/6890/6362/6892	6
C0007282	Carotid Stenosis	7/178	135/21671	0.0518519	6.31282	5.63508	0.000128284	0.00299937	0.00213909	101/1118/348/3162/7941/7852/54209	7
C3860213	Autoinflammatory disorder	5/178	60/21671	0.0833333	10.1456	6.45567	0.000133912	0.00311326	0.00222032	340061/3106/3553/5696/5336	5
C0085655	Polymyositis	8/178	183/21671	0.0437158	5.32228	5.34357	0.000139564	0.00320841	0.00228818	10866/3106/3553/5742/1118/3107/7852/3663	8
C0341106	Eosinophilic esophagitis	8/178	183/21671	0.0437158	5.32228	5.34357	0.000139564	0.00320841	0.00228818	283710/6036/3553/27181/7293/3383/6362/5008	8
C0238790	bone destruction	9/178	234/21671	0.0384615	4.68258	5.1543	0.000141958	0.00324531	0.00231449	101/6275/3553/2048/3162/567/50619/7852/54209	9
C0019911	Hookworm Infections	3/178	13/21671	0.230769	28.0955	8.89305	0.000146674	0.00327723	0.00233726	3135/3553/1118	3
C0040149	Subacute thyroiditis	3/178	13/21671	0.230769	28.0955	8.89305	0.000146674	0.00327723	0.00233726	57817/3106/7253	3
C0085581	Restrictive lung disease	3/178	13/21671	0.230769	28.0955	8.89305	0.000146674	0.00327723	0.00233726	57817/3106/3553	3
C1567742	Alport Syndrome, X-Linked	3/178	13/21671	0.230769	28.0955	8.89305	0.000146674	0.00327723	0.00233726	1286/1285/348	3
C2936719	Mechanical Allodynia	12/178	408/21671	0.0294118	3.5808	4.7892	0.000147336	0.00327723	0.00233726	64805/10911/1844/3553/2048/6891/5742/3107/10062/7852/3663/54209	12
C0574960	Sacroiliitis	4/178	33/21671	0.121212	14.7572	7.19732	0.000149478	0.00329207	0.00234784	3106/3553/3105/3107	4
C0020473	Hyperlipidemia	13/178	472/21671	0.0275424	3.35321	4.70397	0.000149603	0.00329207	0.00234784	57817/3106/341/3553/2048/5742/348/231/3162/7941/10062/5008/1071	13
C0340076	Asthmatic pulmonary eosinophilia	5/178	62/21671	0.0806452	9.81832	6.32784	0.000156578	0.00342723	0.00244423	64805/6036/3553/27181/3162	5
C0017152	Gastritis	10/178	292/21671	0.0342466	4.16942	4.96214	0.000157493	0.00342901	0.0024455	2512/3553/355/5742/57379/27181/6401/1118/3162/3383	10
C0033687	Proteinuria	9/178	239/21671	0.0376569	4.58462	5.0711	0.000166368	0.00360318	0.00256972	3106/355/1286/1285/8542/348/3162/567/3383	9
C0268318	Cholestasis of pregnancy	6/178	100/21671	0.06	7.30483	5.75081	0.000177635	0.00382705	0.00272938	3106/3553/3105/348/3107/151306	6
C0020452	Hyperemia	5/178	64/21671	0.078125	9.5115	6.20569	0.000182065	0.00390207	0.00278288	64805/3553/5742/348/5008	5
C0016053	Fibromyalgia	7/178	143/21671	0.048951	5.95965	5.41512	0.000183344	0.00390912	0.0027879	3106/341/7253/3553/355/3105/348	7
C0035012	Reiter Syndrome	3/178	14/21671	0.214286	26.0887	8.54543	0.000185549	0.00393575	0.0028069	3106/6891/6890	3
C1306889	Peripheral arterial occlusive disease	4/178	35/21671	0.114286	13.914	6.95819	0.000188835	0.0039849	0.00284195	355/348/3383/7941	4
C0039101	synovial sarcoma	10/178	299/21671	0.0334448	4.07181	4.86742	0.000190725	0.00400424	0.00285575	216/6275/3553/2048/6401/3105/3383/3107/6890/7852	10
C0002390	Extrinsic allergic alveolitis	5/178	65/21671	0.0769231	9.36517	6.1466	0.000195937	0.00409279	0.0029189	3553/5696/6890/6362/5698	5
C0042170	Uveomeningoencephalitic Syndrome	6/178	102/21671	0.0588235	7.1616	5.67635	0.000197964	0.00411426	0.00293421	3106/3811/3553/355/3105/3107	6
C0001486	Adenovirus Infections	7/178	145/21671	0.0482759	5.87745	5.36273	0.00019973	0.0041301	0.0029455	23601/340061/3553/4624/3162/3383/3107	7
C0023817	Hyperlipoproteinemia Type I	4/178	36/21671	0.111111	13.5275	6.84584	0.000211084	0.00434306	0.00309739	8542/348/7293/1071	4
C0023896	Alcoholic Liver Diseases	8/178	195/21671	0.0410256	4.99476	5.09943	0.000215547	0.00441281	0.00314713	57817/216/6275/3553/6401/3105/115650/231	8
C0748355	Acute respiratory distress	7/178	147/21671	0.047619	5.79749	5.31131	0.000217279	0.00442626	0.00315672	5973/3553/355/3162/3383/7941/7852	7
C0040147	Thyroiditis	6/178	104/21671	0.0576923	7.02388	5.60388	0.000220087	0.00446136	0.00318176	3106/7253/355/6737/3383/7852	6
C0947751	Vascular inflammations	10/178	305/21671	0.0327869	3.99171	4.78849	0.000223729	0.00451296	0.00321855	7253/3553/2048/6401/1118/348/3162/3383/7941/5008	10
C0333463	Senile Plaques	9/178	249/21671	0.0361446	4.4005	4.91138	0.00022577	0.00451611	0.0032208	3553/970/28959/348/3162/3383/1071/54209/2358	9
C0030807	Pemphigus	5/178	67/21671	0.0746269	9.08561	6.03218	0.000226085	0.00451611	0.0032208	3135/2048/6891/3105/3107	5
C0012715	Iron Metabolism Disorders	3/178	15/21671	0.2	24.3494	8.23235	0.000230537	0.00451611	0.0032208	57817/2512/3162	3
C1853959	Birdshot chorioretinopathy	3/178	15/21671	0.2	24.3494	8.23235	0.000230537	0.00451611	0.0032208	3811/3105/3107	3
C4023560	Generalized periodontitis	3/178	15/21671	0.2	24.3494	8.23235	0.000230537	0.00451611	0.0032208	3106/51314/353345	3
C0023290	Leishmaniasis, Visceral	8/178	197/21671	0.0406091	4.94405	5.06069	0.00023101	0.00451611	0.0032208	57817/6036/3135/3553/3162/3107/338339/3663	8
C1292778	Chronic myeloproliferative disorder	11/178	366/21671	0.0300546	3.65907	4.66896	0.000231567	0.00451611	0.0032208	64805/57817/6275/1844/3553/5777/355/2048/1118/7852/5008	11
C0030326	Panniculitis	4/178	37/21671	0.108108	13.1619	6.73788	0.000235161	0.00454314	0.00324008	3553/355/5696/5698	4
C1328252	Mucocutaneous leishmaniasis	4/178	37/21671	0.108108	13.1619	6.73788	0.000235161	0.00454314	0.00324008	3106/3105/3107/338339	4
C0005283	beta Thalassemia	8/178	198/21671	0.040404	4.91908	5.04152	0.000239076	0.00459718	0.00327862	57817/3811/3135/57379/1118/348/567/6362	8
C0008497	Choriocarcinoma	12/178	431/21671	0.0278422	3.38971	4.56035	0.000243956	0.0046692	0.00332998	199713/3135/3553/2048/84870/3105/3133/3162/567/3107/8837/7852	12
C0008350	Cholelithiasis	9/178	252/21671	0.0357143	4.34811	4.8651	0.000246691	0.00467803	0.00333628	348645/2995/341/3553/3105/348/3162/10062/1071	9
C0275524	Coinfection	9/178	252/21671	0.0357143	4.34811	4.8651	0.000246691	0.00467803	0.00333628	57817/3106/140691/3135/3553/5696/3162/6890/7852	9
C0235782	Gallbladder Carcinoma	13/178	498/21671	0.0261044	3.17814	4.47507	0.000252039	0.00475753	0.00339297	216/5660/3106/2014/355/2048/3105/567/3107/8837/7852/6362/1071	13
C0013990	Pathological accumulation of air in tissues	5/178	69/21671	0.0724638	8.82226	5.92244	0.000259638	0.00487859	0.00347931	6891/115650/348/6890/6892	5
C0745103	Hyperlipoproteinemia Type IIa	8/178	201/21671	0.039801	4.84566	4.98475	0.00026467	0.00495053	0.00353062	3553/6401/8542/348/3383/7941/3107/1071	8
C0018939	Hematological Disease	9/178	255/21671	0.0352941	4.29696	4.81954	0.000269196	0.00498513	0.0035553	57817/274/3553/355/6737/3133/3162/3383/7852	9
C0263361	Psoriasis vulgaris	9/178	255/21671	0.0352941	4.29696	4.81954	0.000269196	0.00498513	0.0035553	5660/3106/3811/3553/3105/348/3162/3107/6890	9
C3665419	intracranial glioma	6/178	108/21671	0.0555556	6.76373	5.46452	0.000270154	0.00498513	0.0035553	3134/2323/355/1285/7293/6362	6
C0034068	Pulmonary Eosinophilia	5/178	70/21671	0.0714286	8.69623	5.86923	0.000277769	0.00510276	0.00363919	64805/6036/3553/27181/3162	5
C0333291	Bleeding ulcer	3/178	16/21671	0.1875	22.8276	7.94836	0.000282027	0.00513515	0.00366228	340061/3553/5742	3
C2004461	Bowel dysfunction	3/178	16/21671	0.1875	22.8276	7.94836	0.000282027	0.00513515	0.00366228	231/567/151306	3
C0854193	Cognitive deterioration	4/178	39/21671	0.102564	12.4869	6.53397	0.000289144	0.00524153	0.00373815	3553/355/348/3383	4
C0011616	Contact Dermatitis	6/178	110/21671	0.0545455	6.64076	5.39747	0.000298331	0.00533754	0.00380663	3553/2048/970/3162/3107/5008	6
C0041948	Uremia	6/178	110/21671	0.0545455	6.64076	5.39747	0.000298331	0.00533754	0.00380663	355/348/3162/567/3383/7941	6
C1842937	AURAL ATRESIA, CONGENITAL	6/178	110/21671	0.0545455	6.64076	5.39747	0.000298331	0.00533754	0.00380663	64805/10911/3106/3553/3133/348	6
C1861172	Venous Thromboembolism	11/178	378/21671	0.0291005	3.54291	4.53888	0.000304926	0.0054319	0.00387392	285286/64805/57817/5453/2512/6737/6401/26301/3162/5336/1071	11
C3841475	beta^+^ Thalassemia	7/178	156/21671	0.0448718	5.46301	5.09109	0.000312308	0.00553243	0.00394562	57817/3135/57379/1118/348/567/6362	7
C1402315	Vascular lesions	6/178	111/21671	0.0540541	6.58093	5.36457	0.000313258	0.00553243	0.00394562	3106/5973/3811/3553/3105/348	6
C1704436	Peripheral Arterial Diseases	10/178	319/21671	0.031348	3.81653	4.61191	0.000319782	0.00562351	0.00401058	64805/3553/2048/5742/348/3162/567/7941/85315/730249	10
C0040558	Toxoplasmosis	6/178	112/21671	0.0535714	6.52217	5.33207	0.000328764	0.00575687	0.00410569	340061/3553/6737/3105/3383/3107	6
C0018133	Graft-vs-Host Disease	12/178	447/21671	0.0268456	3.26838	4.41009	0.000339306	0.00578817	0.00412801	216/3106/23526/3811/3135/3553/3804/3105/970/3133/3383/3107	12
C0342158	Hypothyroidism, Autoimmune	3/178	17/21671	0.176471	21.4848	7.68914	0.000340398	0.00578817	0.00412801	2323/7253/5698	3
C0751340	Myasthenia Gravis, Ocular	3/178	17/21671	0.176471	21.4848	7.68914	0.000340398	0.00578817	0.00412801	3106/355/3105	3
C0854211	Bacterial keratitis	3/178	17/21671	0.176471	21.4848	7.68914	0.000340398	0.00578817	0.00412801	7114/3553/2358	3
C0877635	Cytomegalovirus viremia	3/178	17/21671	0.176471	21.4848	7.68914	0.000340398	0.00578817	0.00412801	3811/3804/5696	3
C1332210	Adult Nodular Lymphocyte Predominant Hodgkin Lymphoma	3/178	17/21671	0.176471	21.4848	7.68914	0.000340398	0.00578817	0.00412801	1844/57379/8837	3
C1332985	Childhood Nodular Lymphocyte Predominant Hodgkin Lymphoma	3/178	17/21671	0.176471	21.4848	7.68914	0.000340398	0.00578817	0.00412801	1844/57379/8837	3
C0242647	Mucosa-Associated Lymphoid Tissue Lymphoma	9/178	264/21671	0.0340909	4.15047	4.68695	0.000347158	0.00587883	0.00419267	3135/5777/355/5742/57379/115650/1118/3383/7852	9
C0751633	Carotid Artery Plaque	4/178	41/21671	0.097561	11.8778	6.34446	0.000351482	0.00592765	0.00422748	64805/348/7941/7852	4
C1290886	Chronic inflammatory disorder	5/178	74/21671	0.0675676	8.22616	5.66654	0.000360064	0.00602385	0.00429609	57817/3106/3553/5777/6401	5
C0002171	Alopecia Areata	6/178	114/21671	0.0526316	6.40775	5.26824	0.000361578	0.00602385	0.00429609	3135/3553/355/3383/3107/6890	6
C0019340	Herpes NOS	6/178	114/21671	0.0526316	6.40775	5.26824	0.000361578	0.00602385	0.00429609	3106/3105/348/3162/3383/3107	6
C0339143	Thyroid associated opthalmopathies	8/178	211/21671	0.0379147	4.61601	4.80338	0.00036668	0.0060743	0.00433207	3106/6275/7253/3553/6401/3105/3383/3107	8
C0019159	Hepatitis A	12/178	451/21671	0.0266075	3.23939	4.37358	0.000367558	0.0060743	0.00433207	2323/6275/3135/3553/355/6737/3105/348/7293/567/3107/54209	12
C4049702	Focal Segmental Glomerulosclerosis, Not Otherwise Specified	4/178	42/21671	0.0952381	11.595	6.25457	0.000386006	0.00635366	0.0045313	2048/3105/8542/7852	4
C0022876	Premature Obstetric Labor	3/178	18/21671	0.166667	20.2912	7.45122	0.000406016	0.00657649	0.00469022	3553/6401/3383	3
C0376300	Dengue Shock Syndrome	3/178	18/21671	0.166667	20.2912	7.45122	0.000406016	0.00657649	0.00469022	23601/3553/3105	3
C0685889	Splenic Hypoplasia	3/178	18/21671	0.166667	20.2912	7.45122	0.000406016	0.00657649	0.00469022	3553/6401/3383	3
C0018378	Guillain-Barre Syndrome	7/178	163/21671	0.0429448	5.22841	4.9313	0.000407191	0.00657649	0.00469022	3553/355/2048/5742/348/3383/7852	7
C0085253	Adult-Onset Still Disease	5/178	76/21671	0.0657895	8.00968	5.57083	0.000407535	0.00657649	0.00469022	3553/355/3162/3383/7852	5
C0238461	Anaplastic thyroid carcinoma	11/178	392/21671	0.0280612	3.41638	4.39362	0.000414397	0.00666111	0.00475057	10866/216/6275/7253/355/2048/970/3640/348/3383/7852	11
C0007867	Cervix Diseases	4/178	43/21671	0.0930233	11.3253	6.16766	0.000422887	0.006693	0.00477331	3106/7253/3811/3107	4
C0032302	Mycoplasma pneumonia	4/178	43/21671	0.0930233	11.3253	6.16766	0.000422887	0.006693	0.00477331	23601/3553/6401/115650	4
C0235896	Pulmonary Infiltrate	4/178	43/21671	0.0930233	11.3253	6.16766	0.000422887	0.006693	0.00477331	3106/355/348/3663	4
C0343055	Generalized pustular psoriasis	4/178	43/21671	0.0930233	11.3253	6.16766	0.000422887	0.006693	0.00477331	3553/3105/348/3107	4
C0006271	Bronchiolitis	6/178	118/21671	0.0508475	6.19054	5.14506	0.000434863	0.00685617	0.00488969	6036/6891/3383/6890/5336/6892	6
C0028960	Oligospermia	8/178	217/21671	0.0368664	4.48838	4.69991	0.000441896	0.00694046	0.0049498	3106/221400/355/57379/3105/3640/3162/3107	8
C4277682	Chemical and Drug Induced Liver Injury	12/178	461/21671	0.0260304	3.16912	4.28406	0.000447036	0.0069945	0.00498834	10866/101/57817/3106/2512/3553/355/3105/348/3162/10062/7850	12
C0085409	Polyendocrinopathies, Autoimmune	7/178	166/21671	0.0421687	5.13392	4.86561	0.000454326	0.00702124	0.00500741	3106/7253/5742/6401/3105/3383/3663	7
C0014057	Japanese Encephalitis	6/178	119/21671	0.0504202	6.13851	5.11515	0.000454877	0.00702124	0.00500741	23601/340061/3553/2048/57379/3383	6
C1851585	MYELOPROLIFERATIVE DISORDER, CHRONIC, WITH EOSINOPHILIA	6/178	119/21671	0.0504202	6.13851	5.11515	0.000454877	0.00702124	0.00500741	3106/3553/3105/348/3383/7852	6
C1861453	Pseudohyperkalemia Cardiff	8/178	218/21671	0.0366972	4.46779	4.68304	0.00045557	0.00702124	0.00500741	57817/3106/3811/57379/3105/348/3107/6892	8
C0042029	Urinary tract infection	8/178	219/21671	0.0365297	4.44739	4.66626	0.000469586	0.00720462	0.00513819	57817/5453/3553/5742/6401/3383/7852/6362	8
C0020541	Portal Hypertension	7/178	167/21671	0.0419162	5.10318	4.84406	0.00047097	0.00720462	0.00513819	10911/3553/5742/22846/3162/3663/151306	7
C0010232	Cowpox	3/178	19/21671	0.157895	19.2232	7.23177	0.00047924	0.00725026	0.00517074	340061/3553/6890	3
C1512508	Human herpesvirus 8 infection	3/178	19/21671	0.157895	19.2232	7.23177	0.00047924	0.00725026	0.00517074	3384/3811/7293	3
C3495436	American cutaneous leishmaniasis	3/178	19/21671	0.157895	19.2232	7.23177	0.00047924	0.00725026	0.00517074	3106/3105/3107	3
C0086445	Idiopathic Membranous Glomerulonephritis	5/178	79/21671	0.0632911	7.70552	5.43363	0.000487409	0.00733038	0.00522788	3106/3105/8542/231/3107	5
C0042109	Urticaria	7/178	168/21671	0.0416667	5.0728	4.82269	0.000488098	0.00733038	0.00522788	3106/3553/355/6401/3162/3383/5336	7
C0376618	Endotoxemia	11/178	401/21671	0.0274314	3.3397	4.30367	0.000500885	0.00746149	0.00532139	53831/3553/5777/355/6401/4624/3162/3383/7941/730249/7852	11
C0021368	Inflammation	12/178	467/21671	0.0256959	3.12841	4.23151	0.000501353	0.00746149	0.00532139	2323/57817/274/7114/3553/355/6401/115650/3162/3383/6362/2358	12
C0001849	AIDS Dementia Complex	4/178	45/21671	0.0888889	10.822	6.00216	0.000504081	0.00746149	0.00532139	3553/348/3107/7852	4
C0751324	Multiple Sclerosis, Acute Fulminating	4/178	45/21671	0.0888889	10.822	6.00216	0.000504081	0.00746149	0.00532139	3553/6401/348/3383	4
C0039128	Syphilis	5/178	80/21671	0.0625	7.6092	5.3895	0.000516485	0.0076177	0.00543279	2995/3811/3804/3105/3107	5
C0002893	Refractory anemias	10/178	340/21671	0.0294118	3.5808	4.36495	0.000526834	0.00774257	0.00552185	57817/216/6275/3553/355/2048/6737/348/3107/7852	10
C0206693	Medullary carcinoma	5/178	81/21671	0.0617284	7.51526	5.34612	0.000546847	0.00797969	0.00569096	7471/7253/5777/5742/3383	5
C3267073	Autoinflammatory disease	5/178	81/21671	0.0617284	7.51526	5.34612	0.000546847	0.00797969	0.00569096	340061/3553/5777/5696/5336	5
C0031736	Polymorphous light eruption	3/178	20/21671	0.15	18.2621	7.02846	0.000560417	0.00812012	0.00579111	3553/3383/3107	3
C0473527	Hypoalphalipoproteinemias	3/178	20/21671	0.15	18.2621	7.02846	0.000560417	0.00812012	0.00579111	348/5360/1071	3
C1367654	Marginal Zone B-Cell Lymphoma	6/178	124/21671	0.0483871	5.89099	4.97056	0.000565963	0.00817171	0.0058279	3106/3135/355/57379/3383/7852	6
C0023787	Lipodystrophy	8/178	226/21671	0.0353982	4.30964	4.55158	0.000577806	0.00829494	0.00591579	3106/3553/5777/355/4624/5696/348/5698	8
C0032231	Pleurisy	5/178	82/21671	0.0609756	7.42361	5.30348	0.000578529	0.00829494	0.00591579	3106/3553/355/3162/3383	5
C0042571	Vertigo	7/178	173/21671	0.0404624	4.92619	4.7183	0.000581338	0.00830627	0.00592387	3106/27010/3553/355/64859/348/567	7
C0023484	Leukemia, Plasma Cell	4/178	47/21671	0.0851064	10.3615	5.84676	0.000595794	0.00848336	0.00605017	7114/3105/3383/7852	4
C0027059	Myocarditis	9/178	285/21671	0.0315789	3.84465	4.39923	0.000603418	0.00856229	0.00610646	7471/140691/3553/355/2048/6737/4624/3162/3663	9
C0949658	Cardiomyopathy, Hypertrophic, Familial	5/178	83/21671	0.060241	7.33417	5.26155	0.00061157	0.00862011	0.0061477	1769/4624/165904/3383/3107	5
C0018790	Cardiac Arrest	11/178	411/21671	0.026764	3.25844	4.20667	0.000614224	0.00862011	0.0061477	388011/3106/7114/3553/5742/6401/3105/348/3162/3383/3107	11
C0008312	Primary biliary cirrhosis	12/178	478/21671	0.0251046	3.05641	4.13732	0.000615434	0.00862011	0.0061477	57817/3106/3553/355/6737/3105/348/3162/3383/283234/3663/151306	12
C0023891	Liver Cirrhosis, Alcoholic	6/178	126/21671	0.047619	5.79749	4.91492	0.000615872	0.00862011	0.0061477	3106/3553/355/6401/3105/348	6
C4290046	trachomatis	7/178	175/21671	0.04	4.86989	4.67767	0.000622378	0.00868165	0.00619158	340061/3553/2048/3105/348/567/6362	7
C0003130	Anoxia	9/178	287/21671	0.0313589	3.81786	4.37327	0.0006343	0.00881806	0.00628886	3135/3553/355/56659/348/3162/3383/8837/7852	9
C0040021	Thromboangiitis Obliterans	6/178	127/21671	0.0472441	5.75184	4.88755	0.000642073	0.00885521	0.00631536	3106/7253/3553/6401/3105/3383	6
C1262091	Lymphocytic infiltration	5/178	84/21671	0.0595238	7.24686	5.22031	0.000646005	0.00885521	0.00631536	3106/7253/3811/7852/6362	5
C4521256	Glomerulopathy Assessment	5/178	84/21671	0.0595238	7.24686	5.22031	0.000646005	0.00885521	0.00631536	3106/355/1286/1285/348	5
C0268380	Systemic amyloidosis	3/178	21/21671	0.142857	17.3925	6.83936	0.000649884	0.00885521	0.00631536	6737/348/567	3
C0339985	Idiopathic bronchiectasis	3/178	21/21671	0.142857	17.3925	6.83936	0.000649884	0.00885521	0.00631536	6891/3107/6890	3
C0752355	Myotonia Fluctuans (disorder)	3/178	21/21671	0.142857	17.3925	6.83936	0.000649884	0.00885521	0.00631536	7471/3553/7852	3
C0333516	Tumor necrosis	10/178	350/21671	0.0285714	3.47849	4.25411	0.000658902	0.00891902	0.00636087	2323/6275/3553/355/3133/348/3383/7941/7852/5008	10
C1868683	B-CELL MALIGNANCY, LOW-GRADE	10/178	350/21671	0.0285714	3.47849	4.25411	0.000658902	0.00891902	0.00636087	3811/3135/3553/355/57379/115650/970/3383/338339/7852	10
C0162429	Malnutrition	11/178	417/21671	0.0263789	3.21156	4.14989	0.000691965	0.00932134	0.0066478	2323/57817/3553/355/6891/348/3162/567/3383/3107/6890	11
C4505456	HIV Coinfection	6/178	129/21671	0.0465116	5.66266	4.83366	0.000697063	0.00932134	0.0066478	3106/5699/3811/3553/3107/393	6
C0024440	Macular Edema, Cystoid	4/178	49/21671	0.0816327	9.93855	5.70043	0.000698761	0.00932134	0.0066478	3553/3105/348/3663	4
C0857175	Postinfarction	4/178	49/21671	0.0816327	9.93855	5.70043	0.000698761	0.00932134	0.0066478	3162/8837/5008/1071	4
C0032463	Polycythemia Vera	9/178	291/21671	0.0309278	3.76538	4.32203	0.00069995	0.00932134	0.0066478	57817/3135/5777/355/2048/3105/1118/3107/8837	9
C0871189	Psychotic symptom	5/178	86/21671	0.0581395	7.07833	5.13982	0.000719209	0.00954691	0.00680867	2995/5973/4245/3105/348	5
C0008370	Cholestasis	11/178	420/21671	0.0261905	3.18862	4.12188	0.000733808	0.00970939	0.00692455	216/3553/2048/1118/348/3162/567/3383/10062/151306/6892	11
C0238694	Peripheral arthritis	3/178	22/21671	0.136364	16.6019	6.66286	0.00074797	0.00980222	0.00699075	3105/5698/151306	3
C0342883	Cholesteryl Ester Transfer Protein Deficiency	3/178	22/21671	0.136364	16.6019	6.66286	0.00074797	0.00980222	0.00699075	348/5360/1071	3
C0409979	Neonatal Systemic lupus erythematosus	3/178	22/21671	0.136364	16.6019	6.66286	0.00074797	0.00980222	0.00699075	3106/6737/3663	3
C0020443	Hypercholesterolemia	12/178	489/21671	0.0245399	2.98766	4.0458	0.000750591	0.00980535	0.00699298	10911/7114/3553/2048/6401/348/3162/3383/7941/10062/1071/54209	12
C3658302	Stevens-Johnson Syndrome Toxic Epidermal Necrolysis Spectrum	4/178	50/21671	0.08	9.73978	5.63039	0.000754696	0.00982776	0.00700897	3106/3105/231/3107	4
C1719672	Severe Sepsis	7/178	181/21671	0.038674	4.70845	4.55937	0.000759464	0.00985865	0.007031	57817/7114/3135/3553/348/7293/3162	7
C0086981	Sicca Syndrome	6/178	132/21671	0.0454545	5.53396	4.75492	0.000786304	0.010175	0.00725659	3553/355/6401/3162/567/3383	6
C1397307	Cardiac fibrosis	9/178	297/21671	0.030303	3.68931	4.24685	0.000808749	0.0103668	0.00739338	7471/10911/6275/3553/84166/83881/567/7852/5008	9
C0019360	Herpes zoster disease	4/178	51/21671	0.0784314	9.5488	5.56229	0.000813722	0.0103668	0.00739338	10866/3106/3105/348	4
C0031046	Pericarditis	4/178	51/21671	0.0784314	9.5488	5.56229	0.000813722	0.0103668	0.00739338	3106/3553/355/6737	4
C0263313	Pemphigus Foliaceus	4/178	51/21671	0.0784314	9.5488	5.56229	0.000813722	0.0103668	0.00739338	3811/2048/3105/3107	4
C4699152	ST-segment elevation myocardial infarction (STEMI)	4/178	51/21671	0.0784314	9.5488	5.56229	0.000813722	0.0103668	0.00739338	64805/3553/7941/7852	4
C0019187	Hepatitis, Alcoholic	6/178	133/21671	0.0451128	5.49235	4.7292	0.000817931	0.0103882	0.00740868	3106/6275/140691/3553/3383/7852	6
C0031106	Aggressive Periodontitis	7/178	184/21671	0.0380435	4.63169	4.50215	0.000836424	0.0105904	0.00755288	3106/3553/6401/3105/3107/7850/3663	7
C0019357	Keratitis, Herpetic	3/178	23/21671	0.130435	15.8801	6.49757	0.000854992	0.0106293	0.0075806	3553/3105/348	3
C0037061	Siderosis	3/178	23/21671	0.130435	15.8801	6.49757	0.000854992	0.0106293	0.0075806	57817/348/3162	3
C0343466	Type 2 lepra reaction	3/178	23/21671	0.130435	15.8801	6.49757	0.000854992	0.0106293	0.0075806	3553/6401/3383	3
C0343467	Erythema nodosum leprosum	3/178	23/21671	0.130435	15.8801	6.49757	0.000854992	0.0106293	0.0075806	3553/6401/3383	3
C1305904	Familial hematuria	3/178	23/21671	0.130435	15.8801	6.49757	0.000854992	0.0106293	0.0075806	1286/1285/8542	3
C1563715	Andersen Syndrome	3/178	23/21671	0.130435	15.8801	6.49757	0.000854992	0.0106293	0.0075806	1286/1285/348	3
C0343804	Chronic Chagas' disease	4/178	52/21671	0.0769231	9.36517	5.49604	0.000875933	0.0108242	0.00771962	3106/3811/3553/6737	4
C1704423	Milroy Disease	4/178	52/21671	0.0769231	9.36517	5.49604	0.000875933	0.0108242	0.00771962	355/348/231/567	4
C1266025	Traditional Serrated Adenoma	5/178	90/21671	0.0555556	6.76373	4.98632	0.000884013	0.0108914	0.00776751	2048/84870/5742/6737/3383	5
C1270972	Mild cognitive disorder	11/178	430/21671	0.0255814	3.11446	4.0303	0.000888794	0.0109176	0.0077862	274/341/5973/3553/51314/6401/348/3162/7941/54209/2358	11
C0039730	Thalassemia	6/178	136/21671	0.0441176	5.3712	4.6536	0.00091873	0.0112267	0.00800668	57817/3106/355/3105/348/567	6
C0035243	Respiratory Tract Infections	7/178	187/21671	0.0374332	4.55738	4.44616	0.000919419	0.0112267	0.00800668	57817/6036/3553/3105/7852/2358/55509	7
C0017677	Glossitis, Benign Migratory	4/178	53/21671	0.0754717	9.18847	5.43155	0.000941421	0.0114276	0.00814992	3106/3553/3105/3107	4
C0042165	Anterior uveitis	4/178	53/21671	0.0754717	9.18847	5.43155	0.000941421	0.0114276	0.00814992	3106/3553/3105/3663	4
C0022336	Creutzfeldt-Jakob disease	6/178	137/21671	0.0437956	5.33199	4.62889	0.00095437	0.0115507	0.00823772	216/3553/5742/1118/348/54209	6
C0035222	Respiratory Distress Syndrome, Adult	11/178	434/21671	0.0253456	3.08576	3.99442	0.000957953	0.01156	0.0082444	6275/5973/3553/355/2048/231/3162/3383/7941/7852/6892	11
C0032768	Postherpetic neuralgia	3/178	24/21671	0.125	15.2184	6.34232	0.00097126	0.0115769	0.00825644	3106/3105/348	3
C0042167	Uveitis, Posterior	3/178	24/21671	0.125	15.2184	6.34232	0.00097126	0.0115769	0.00825644	3106/3105/3383	3
C0598784	Dyslipoproteinemias	3/178	24/21671	0.125	15.2184	6.34232	0.00097126	0.0115769	0.00825644	348/5360/1071	3
C1963961	Testosterone deficiency	3/178	24/21671	0.125	15.2184	6.34232	0.00097126	0.0115769	0.00825644	3553/3640/1071	3
C0001339	Acute pancreatitis	11/178	435/21671	0.0252874	3.07866	3.98551	0.000975921	0.0115769	0.00825644	340061/3553/355/2048/6401/348/3162/3383/7941/7852/151306	11
C0730285	Diabetic macular edema	5/178	92/21671	0.0543478	6.6167	4.91304	0.000976233	0.0115769	0.00825644	51237/3553/348/3383/7941	5
C0242488	Acute Lung Injury	5/178	93/21671	0.0537634	6.54555	4.87721	0.00102493	0.0120962	0.00862674	64805/3553/355/3162/3383	5
C0002962	Angina Pectoris	6/178	139/21671	0.0431655	5.25527	4.58019	0.00102883	0.0120962	0.00862674	5973/3553/348/3383/7941/1071	6
C0151825	Bone pain	6/178	139/21671	0.0431655	5.25527	4.58019	0.00102883	0.0120962	0.00862674	7471/3553/64859/5696/7852/54209	6
C0038644	Sudden infant death syndrome	6/178	140/21671	0.0428571	5.21774	4.5562	0.0010677	0.0124818	0.00890177	51237/1844/3553/355/348/3162	6
C0242723	Parasitemia	6/178	140/21671	0.0428571	5.21774	4.5562	0.0010677	0.0124818	0.00890177	2323/57817/3106/3553/348/3383	6
C0015696	Fatty Liver, Alcoholic	5/178	94/21671	0.0531915	6.47591	4.8419	0.00107542	0.0125138	0.00892459	57817/3106/3553/3105/348	5
C0848548	hypertensive nephropathy	4/178	55/21671	0.0727273	8.85434	5.30755	0.0010826	0.0125138	0.00892459	1286/1285/8542/567	4
C1320214	Invasive Streptococcus pneumoniae disease	4/178	55/21671	0.0727273	8.85434	5.30755	0.0010826	0.0125138	0.00892459	2323/3553/355/3383	4
C2936179	Obesity, Visceral	4/178	55/21671	0.0727273	8.85434	5.30755	0.0010826	0.0125138	0.00892459	216/348/3162/1071	4
C0026766	Multiple Organ Failure	3/178	25/21671	0.12	14.6097	6.19612	0.00109707	0.0126455	0.00901853	3553/355/3383	3
C0015230	Exanthema	8/178	251/21671	0.0318725	3.88039	4.17704	0.00113985	0.0131019	0.00934401	3106/3553/6737/5696/3105/567/54757/5698	8
C0086743	Osteoarthrosis Deformans	5/178	96/21671	0.0520833	6.341	4.77281	0.00118188	0.0135472	0.00966161	526/6275/2512/27071/3553	5
C0014518	Toxic Epidermal Necrolysis	6/178	143/21671	0.041958	5.10827	4.48556	0.00119109	0.0135771	0.00968293	10866/3106/355/3105/231/3107	6
C0017205	Gaucher Disease	6/178	143/21671	0.041958	5.10827	4.48556	0.00119109	0.0135771	0.00968293	57817/5660/3811/1118/7852/6362	6
C1860320	Bone marrow hypercellularity	3/178	26/21671	0.115385	14.0478	6.05807	0.00123272	0.0139573	0.00995407	355/64859/7852	3
C0340288	Stable angina	6/178	144/21671	0.0416667	5.0728	4.46245	0.00123456	0.0139573	0.00995407	64805/6275/348/3383/7941/7852	6
C0037199	Sinusitis	5/178	97/21671	0.0515464	6.27563	4.73899	0.00123795	0.0139573	0.00995407	3553/51314/338339/7852/5698	5
C0700345	Candidiasis, Vulvovaginal	4/178	57/21671	0.0701754	8.54366	5.18971	0.00123801	0.0139573	0.00995407	5660/3553/2760/7852	4
C0017665	Membranous glomerulonephritis	7/178	197/21671	0.035533	4.32604	4.26771	0.00124392	0.0139856	0.00997424	3106/3553/5696/3105/8542/348/6890	7
C0003872	Arthritis, Psoriatic	11/178	450/21671	0.0244444	2.97604	3.85488	0.00128073	0.0142826	0.010186	10866/3134/3106/3811/3553/5742/5696/3105/3133/3107/5698	11
C0278660	Adult Synovial Sarcoma	7/178	198/21671	0.0353535	4.30419	4.25053	0.00128074	0.0142826	0.010186	6275/3553/2048/3105/3107/6890/7852	7
C0279982	Childhood Synovial Sarcoma	7/178	198/21671	0.0353535	4.30419	4.25053	0.00128074	0.0142826	0.010186	6275/3553/2048/3105/3107/6890/7852	7
C0026916	Mycobacterium avium-intracellulare Infection	4/178	58/21671	0.0689655	8.39636	5.13293	0.00132128	0.0146158	0.0104237	3106/3553/970/3383	4
C0036472	Scrub Typhus	4/178	58/21671	0.0689655	8.39636	5.13293	0.00132128	0.0146158	0.0104237	3553/84166/3105/3107	4
C3665365	Arteriosclerotic cardiovascular disease, NOS	4/178	58/21671	0.0689655	8.39636	5.13293	0.00132128	0.0146158	0.0104237	3553/348/10062/1071	4
C0151669	Increased antibody level in blood	3/178	27/21671	0.111111	13.5275	5.92744	0.00137848	0.0150863	0.0107592	340061/5696/5698	3
C0178879	Urinary tract obstruction	3/178	27/21671	0.111111	13.5275	5.92744	0.00137848	0.0150863	0.0107592	567/3383/5008	3
C0281479	Primary Systemic Amyloidosis	3/178	27/21671	0.111111	13.5275	5.92744	0.00137848	0.0150863	0.0107592	6737/348/567	3
C0523744	Lipids measurement	3/178	27/21671	0.111111	13.5275	5.92744	0.00137848	0.0150863	0.0107592	348/5360/1071	3
C0917796	Optic Atrophy, Hereditary, Leber	5/178	100/21671	0.05	6.08736	4.64032	0.00141797	0.0154773	0.0110381	3106/3553/6891/3105/231	5
C0039483	Giant Cell Arteritis	8/178	260/21671	0.0307692	3.74607	4.05387	0.00142566	0.0155201	0.0110686	3106/3553/355/6401/231/3383/7852/3663	8
C0276447	Rhinovirus infection	7/178	202/21671	0.0346535	4.21896	4.18289	0.00143667	0.0155987	0.0111247	140691/3553/84166/5696/3383/3107/5698	7
C0027947	Neutropenia	10/178	389/21671	0.0257069	3.12975	3.85734	0.00146166	0.0158282	0.0112884	2323/3106/3553/57379/64859/6401/7293/3162/3383/7852	10
C0856742	Post MI	7/178	203/21671	0.0344828	4.19818	4.16626	0.00147787	0.0159618	0.0113837	3553/2048/5742/3162/567/8837/2358	7
C0020479	Hyperlipoproteinemia Type III	3/178	28/21671	0.107143	13.0443	5.80356	0.00153463	0.0164883	0.0117591	341/348/1071	3
C0031094	Periodontal Pocket	3/178	28/21671	0.107143	13.0443	5.80356	0.00153463	0.0164883	0.0117591	101/3553/5360	3
C0031090	Periodontal Diseases	9/178	326/21671	0.0276074	3.36112	3.90903	0.00154595	0.0165666	0.011815	3811/3553/6401/348/5360/3383/54757/7852/54209	9
C4721532	Lymphoma, Non-Hodgkin, Familial	11/178	462/21671	0.0238095	2.89874	3.7542	0.00157754	0.0168612	0.0120251	216/3135/5777/355/57379/115650/970/567/338339/7852/5698	11
C0155765	Disease of capillaries	4/178	61/21671	0.0655738	7.98342	4.97046	0.00159448	0.0169105	0.0120602	6401/348/3162/1071	4
C0600327	Toxic Shock Syndrome	4/178	61/21671	0.0655738	7.98342	4.97046	0.00159448	0.0169105	0.0120602	3553/2048/3105/3162	4
C0678213	Complete hydatidiform mole	4/178	61/21671	0.0655738	7.98342	4.97046	0.00159448	0.0169105	0.0120602	3106/199713/3105/5698	4
C0032181	Platelet Count measurement	8/178	265/21671	0.0301887	3.67539	3.98779	0.00160745	0.0170043	0.0121271	10866/100507392/3106/51513/3105/348/85315/4065	8
C0022116	Ischemia	5/178	103/21671	0.0485437	5.91006	4.5456	0.00161658	0.0170133	0.0121336	6275/6401/348/231/3162	5
C0028840	Ocular Hypertension	5/178	103/21671	0.0485437	5.91006	4.5456	0.00161658	0.0170133	0.0121336	64805/3553/355/3105/231	5
C0206694	Mucoepidermoid Carcinoma	6/178	153/21671	0.0392157	4.7744	4.26367	0.00168257	0.0175035	0.0124831	216/3135/2048/5742/3162/7852	6
C0205748	Dysplastic Nevus	5/178	104/21671	0.0480769	5.85323	4.51485	0.00168711	0.0175035	0.0124831	3106/3553/2048/348/5008	5
C0011253	Delusions	4/178	62/21671	0.0645161	7.85466	4.91876	0.00169364	0.0175035	0.0124831	5660/3553/348/23780	4
C0262985	Psoriasiform eczema	4/178	62/21671	0.0645161	7.85466	4.91876	0.00169364	0.0175035	0.0124831	3106/3383/3107/7852	4
C2733158	Cerebral Small Vessel Diseases	4/178	62/21671	0.0645161	7.85466	4.91876	0.00169364	0.0175035	0.0124831	3553/8542/348/7941	4
C0302314	Xanthoma	3/178	29/21671	0.103448	12.5945	5.68584	0.00170143	0.0175035	0.0124831	5742/348/1071	3
C0860564	Retinoic acid syndrome	3/178	29/21671	0.103448	12.5945	5.68584	0.00170143	0.0175035	0.0124831	3553/3383/7852	3
C0878675	Erdheim-Chester Disease	3/178	29/21671	0.103448	12.5945	5.68584	0.00170143	0.0175035	0.0124831	3553/2048/6362	3
C1334815	Multi-centric Castleman's Disease	3/178	29/21671	0.103448	12.5945	5.68584	0.00170143	0.0175035	0.0124831	51237/57817/3553	3
C0008354	Cholera	7/178	209/21671	0.0334928	4.07766	4.06864	0.00174484	0.0178165	0.0127063	6275/3553/348/7453/3383/1071/6892	7
C0021831	Intestinal Diseases	7/178	209/21671	0.0334928	4.07766	4.06864	0.00174484	0.0178165	0.0127063	3135/3553/5742/231/3162/567/151306	7
C1845050	PIGMENTARY DISORDER, RETICULATE, WITH SYSTEMIC MANIFESTATIONS	7/178	209/21671	0.0334928	4.07766	4.06864	0.00174484	0.0178165	0.0127063	7114/3553/348/3162/3383/7941/2358	7
C0022578	Keratoconus	8/178	269/21671	0.0297398	3.62073	3.93607	0.00176573	0.0179407	0.0127949	2014/6275/3553/355/1286/1285/3105/3162	8
C0428474	Serum LDL cholesterol measurement	8/178	269/21671	0.0297398	3.62073	3.93607	0.00176573	0.0179407	0.0127949	341/5699/355/5742/1379/348/3383/1071	8
C4082937	Necrotizing enterocolitis in fetus OR newborn	7/178	210/21671	0.0333333	4.05824	4.05272	0.00179276	0.0181688	0.0129576	3553/6737/6401/3162/3383/2760/3663	7
C0085435	Arthritis, Reactive	4/178	63/21671	0.0634921	7.72998	4.86819	0.00179701	0.0181688	0.0129576	3106/6891/3107/6890	4
C0940937	precancerous lesions	8/178	270/21671	0.0296296	3.60732	3.92329	0.00180716	0.0182266	0.0129989	3553/355/5742/6737/57379/3383/6362/151306	8
C0011875	Diabetic Angiopathies	5/178	106/21671	0.0471698	5.74279	4.45454	0.00183491	0.0184612	0.0131662	5973/348/231/3162/3383	5
C0031350	Pharyngitis	3/178	30/21671	0.1	12.1747	5.57378	0.00187914	0.0186779	0.0133207	116071/3107/7852	3
C0149781	Spontaneous pneumothorax	3/178	30/21671	0.1	12.1747	5.57378	0.00187914	0.0186779	0.0133207	3106/5742/3162	3
C0409818	Chronic Infantile Neurological, Cutaneous, and Articular Syndrome	3/178	30/21671	0.1	12.1747	5.57378	0.00187914	0.0186779	0.0133207	340061/3553/5336	3
C3203653	IgG4-Related Sclerosing Disease	3/178	30/21671	0.1	12.1747	5.57378	0.00187914	0.0186779	0.0133207	3553/57379/6362	3
C3658301	Mycoplasma-Induced Stevens-Johnson Syndrome	3/178	30/21671	0.1	12.1747	5.57378	0.00187914	0.0186779	0.0133207	3106/3105/3107	3
C0011269	Dementia, Vascular	7/178	212/21671	0.0330189	4.01995	4.02119	0.00189166	0.0187571	0.0133772	57817/3553/1118/79890/348/3383/1071	7
C0178468	Autoimmune thyroid disease	5/178	107/21671	0.046729	5.68912	4.42496	0.00191226	0.0189158	0.0134904	7253/7114/3135/355/3107	5
C0850666	Infection caused by Helicobacter pylori	9/178	337/21671	0.0267062	3.25141	3.79074	0.00193792	0.0191236	0.0136386	1769/3553/5742/6737/57379/6401/1118/3383/3107	9
C0018681	Headache	9/178	338/21671	0.0266272	3.24179	3.78023	0.00197717	0.0194642	0.0138815	51237/1844/3553/355/51314/5742/10385/348/231	9
C0162323	Polyarthritis	4/178	65/21671	0.0615385	7.49213	4.77032	0.00201672	0.0197591	0.0140918	3553/3105/3107/3663	4
C1328840	Autoimmune Lymphoproliferative Syndrome	4/178	65/21671	0.0615385	7.49213	4.77032	0.00201672	0.0197591	0.0140918	355/3105/115650/6890	4
C1848296	DOSAGE-SENSITIVE SEX REVERSAL	6/178	159/21671	0.0377358	4.59423	4.13957	0.00204352	0.019974	0.0142451	3106/3553/6891/3105/231/6890	6
C1274933	Drug-Induced Stevens Johnson Syndrome	3/178	31/21671	0.0967742	11.782	5.46691	0.002068	0.0201178	0.0143476	3106/3105/3107	3
C1395512	Placental dysfunction	3/178	31/21671	0.0967742	11.782	5.46691	0.002068	0.0201178	0.0143476	3553/3162/2358	3
C0155094	Corneal pannus	4/178	66/21671	0.0606061	7.37862	4.72294	0.00213325	0.0206548	0.0147306	101/6275/3553/3383	4
C3463897	HYDATIDIFORM MOLE, RECURRENT, 1	4/178	66/21671	0.0606061	7.37862	4.72294	0.00213325	0.0206548	0.0147306	2512/199713/3105/5698	4
C0024419	Waldenstrom Macroglobulinemia	6/178	162/21671	0.037037	4.50916	4.07982	0.00224455	0.0216564	0.0154449	3553/57379/115650/970/7852/5336	6
C1963077	Bone Pain, CTCAE 3.0	4/178	67/21671	0.0597015	7.26849	4.67653	0.00225434	0.0216564	0.0154449	7471/64859/5696/54209	4
C4554063	Bone Pain, CTCAE 5.0	4/178	67/21671	0.0597015	7.26849	4.67653	0.00225434	0.0216564	0.0154449	7471/64859/5696/54209	4
C0221292	Basophilic leukemia	3/178	32/21671	0.09375	11.4138	5.36484	0.00226826	0.0216564	0.0154449	6891/5696/567	3
C2938905	Central Nervous System Sensitization	3/178	32/21671	0.09375	11.4138	5.36484	0.00226826	0.0216564	0.0154449	3553/2048/7852	3
C4087436	HIV viraemia	3/178	32/21671	0.09375	11.4138	5.36484	0.00226826	0.0216564	0.0154449	3106/355/3105	3
C0271441	Chronic otitis media	6/178	163/21671	0.0368098	4.48149	4.06022	0.00231477	0.0220493	0.0157251	51314/6891/115650/6890/338339/6892	6
C0034150	Purpura	4/178	68/21671	0.0588235	7.1616	4.63108	0.00238008	0.0225669	0.0160943	3106/3553/3105/115650	4
C1304508	Spindle cell hemangioma	4/178	68/21671	0.0588235	7.1616	4.63108	0.00238008	0.0225669	0.0160943	7253/3553/5742/3105	4
C0178664	Glomerulosclerosis (disorder)	7/178	221/21671	0.0316742	3.85625	3.88391	0.00239018	0.0226106	0.0161254	341/6275/3553/8542/348/3383/7852	7
C0022548	Keloid	6/178	165/21671	0.0363636	4.42717	4.02151	0.00246016	0.0231949	0.0165422	6275/2512/5742/84166/8542/5008	6
C0038436	Post-Traumatic Stress Disorder	10/178	418/21671	0.0239234	2.91261	3.59332	0.00247003	0.0231949	0.0165422	51237/3106/1844/3553/2048/10170/348/3162/3383/3107	10
C0002949	Aneurysm, Dissecting	3/178	33/21671	0.0909091	11.0679	5.26719	0.00248014	0.0231949	0.0165422	3553/348/3383	3
C0392163	Corneal erosion	3/178	33/21671	0.0909091	11.0679	5.26719	0.00248014	0.0231949	0.0165422	3106/1286/1285	3
C0683381	inflammatory joint disease	3/178	33/21671	0.0909091	11.0679	5.26719	0.00248014	0.0231949	0.0165422	3106/3553/5008	3
C0345967	Malignant mesothelioma	10/178	420/21671	0.0238095	2.89874	3.57595	0.00255622	0.0238523	0.017011	3384/3135/3553/2048/6368/7293/3162/3383/8837/7852	10
C0010414	Infection by Cryptococcus neoformans	6/178	167/21671	0.0359281	4.37415	3.9834	0.00261231	0.024224	0.0172761	1769/355/1118/3383/6890/338339	6
C0149940	Sciatic Neuropathy	5/178	115/21671	0.0434783	5.29336	4.201	0.00261961	0.024224	0.0172761	3553/355/348/3162/3383	5
C0242584	Autoimmune thrombocytopenia	5/178	115/21671	0.0434783	5.29336	4.201	0.00261961	0.024224	0.0172761	3811/3553/355/5742/7293	5
C1963943	Atherothrombosis	5/178	115/21671	0.0434783	5.29336	4.201	0.00261961	0.024224	0.0172761	64805/3553/5742/348/1071	5
C0007133	Carcinoma, Papillary	7/178	225/21671	0.0311111	3.78769	3.8252	0.0026418	0.0243032	0.0173326	51237/6275/7253/1844/355/5742/3640	7
C0023364	Leptospirosis	4/178	70/21671	0.0571429	6.95698	4.54286	0.00264589	0.0243032	0.0173326	3811/3553/6401/3383	4
C3887551	Memory dysfunction	4/178	70/21671	0.0571429	6.95698	4.54286	0.00264589	0.0243032	0.0173326	3553/348/5360/3162	4
C0013581	Ectopia Lentis	3/178	34/21671	0.0882353	10.7424	5.17366	0.00270386	0.0245616	0.0175168	6891/6890/6892	3
C0206182	Lymphomatoid Papulosis	3/178	34/21671	0.0882353	10.7424	5.17366	0.00270386	0.0245616	0.0175168	3553/567/7852	3
C0338437	Neurocysticercosis	3/178	34/21671	0.0882353	10.7424	5.17366	0.00270386	0.0245616	0.0175168	355/3105/3383	3
C0878521	Beta thalassemia trait	3/178	34/21671	0.0882353	10.7424	5.17366	0.00270386	0.0245616	0.0175168	57817/57379/1071	3
C2939094	Skin sensitisation	3/178	34/21671	0.0882353	10.7424	5.17366	0.00270386	0.0245616	0.0175168	3553/3162/3383	3
C0011603	Dermatitis	11/178	496/21671	0.0221774	2.70004	3.48561	0.00273663	0.0248044	0.01769	3106/3553/6737/348/7293/3162/3383/6890/8837/5008/151306	11
C1292753	Primary Effusion Lymphoma	6/178	169/21671	0.035503	4.32239	3.94589	0.00277143	0.0250419	0.0178594	3553/2048/3383/3107/8837/3663	6
C0041834	Erythema	7/178	227/21671	0.030837	3.75432	3.79634	0.002775	0.0250419	0.0178594	340061/3106/5973/3553/5696/3383/5336	7
C0085109	Corneal Neovascularization	5/178	117/21671	0.042735	5.20287	4.14826	0.0028226	0.0254157	0.018126	7471/3553/348/3383/7852	5
C0026269	Mitral Valve Stenosis	6/178	170/21671	0.0352941	4.29696	3.92735	0.00285365	0.0255837	0.0182458	3553/2048/6891/348/3162/567	6
C0040100	Thymoma	8/178	291/21671	0.0274914	3.347	3.66815	0.00286955	0.0255837	0.0182458	3105/970/7293/3383/3107/4065/8837/7852	8
C0030491	Parapsoriasis	2/178	10/21671	0.2	24.3494	6.72091	0.00289099	0.0255837	0.0182458	3105/3133	2
C0242073	Pulmonary congestion	2/178	10/21671	0.2	24.3494	6.72091	0.00289099	0.0255837	0.0182458	3553/5008	2
C0279705	Thymoma, type B3	2/178	10/21671	0.2	24.3494	6.72091	0.00289099	0.0255837	0.0182458	970/4065	2
C0343052	Guttate psoriasis	2/178	10/21671	0.2	24.3494	6.72091	0.00289099	0.0255837	0.0182458	348/3107	2
C1411980	Mycobacterium avium infection	2/178	10/21671	0.2	24.3494	6.72091	0.00289099	0.0255837	0.0182458	970/3383	2
C1833213	Hyperferritinemia, hereditary, with congenital cataracts	2/178	10/21671	0.2	24.3494	6.72091	0.00289099	0.0255837	0.0182458	57817/2512	2
C0029458	Osteoporosis, Postmenopausal	6/178	171/21671	0.0350877	4.27183	3.90895	0.0029377	0.0258475	0.0184339	57817/3106/3553/3105/3383/5336	6
C0001306	Acute alcoholic liver disease	3/178	35/21671	0.0857143	10.4355	5.08394	0.00293964	0.0258475	0.0184339	3553/355/3162	3
C4011788	Behavioral variant of frontotemporal dementia	3/178	35/21671	0.0857143	10.4355	5.08394	0.00293964	0.0258475	0.0184339	341/348/54209	3
C0268398	Familial lichen amyloidosis	7/178	230/21671	0.0304348	3.70535	3.75367	0.0029844	0.0261851	0.0186747	274/3553/355/51314/348/3162/3383	7
C0205734	Diabetes, Autoimmune	6/178	172/21671	0.0348837	4.247	3.8907	0.00302358	0.0264724	0.0188796	3553/57379/3105/567/3383/3107	6
C0917798	Cerebral Ischemia	5/178	120/21671	0.0416667	5.0728	4.07137	0.00314808	0.027504	0.0196153	3106/3553/355/6401/3383	5
C0020455	Hypergammaglobulinemia	3/178	36/21671	0.0833333	10.1456	4.99777	0.0031877	0.0276155	0.0196948	355/6737/567	3
C0151632	ESR raised	3/178	36/21671	0.0833333	10.1456	4.99777	0.0031877	0.0276155	0.0196948	340061/5696/5698	3
C0271051	Macular retinal edema	3/178	36/21671	0.0833333	10.1456	4.99777	0.0031877	0.0276155	0.0196948	3553/348/3663	3
C3854434	Bone marrow infiltration	3/178	36/21671	0.0833333	10.1456	4.99777	0.0031877	0.0276155	0.0196948	5777/567/7852	3
C0030246	Pustulosis of Palms and Soles	4/178	74/21671	0.0540541	6.58093	4.3764	0.00323725	0.0279859	0.019959	3553/3105/348/3107	4
C1850900	Familial primary gastric lymphoma	5/178	121/21671	0.0413223	5.03088	4.04631	0.00326235	0.0281438	0.0200716	5777/5742/57379/115650/7852	5
C3811653	Experimental Organism Basal Cell Carcinoma	10/178	437/21671	0.0228833	2.78598	3.43235	0.00339055	0.028291	0.0201766	7471/6275/3811/3553/355/5742/348/3383/3107/7852	10
C0036916	Sexually Transmitted Diseases	4/178	75/21671	0.0533333	6.49318	4.3367	0.00339804	0.028291	0.0201766	3553/6737/3105/567	4
C0037054	Sickle Cell Trait	4/178	75/21671	0.0533333	6.49318	4.3367	0.00339804	0.028291	0.0201766	57817/355/8542/348	4
C0079773	Lymphoma, T-Cell, Cutaneous	9/178	367/21671	0.0245232	2.98563	3.49133	0.00342138	0.028291	0.0201766	274/3553/5777/355/121355/3107/8837/7852/6362	9
C0010403	Cryoglobulinemia	3/178	37/21671	0.0810811	9.87139	4.91491	0.00344821	0.028291	0.0201766	3811/3105/7850	3
C0152069	Echinococcus multilocularis infection	3/178	37/21671	0.0810811	9.87139	4.91491	0.00344821	0.028291	0.0201766	3553/6891/6890	3
C0155733	Atherosclerosis of aorta	3/178	37/21671	0.0810811	9.87139	4.91491	0.00344821	0.028291	0.0201766	348/3162/1071	3
C0344724	Ostium secundum atrial septal defect	3/178	37/21671	0.0810811	9.87139	4.91491	0.00344821	0.028291	0.0201766	64805/5973/4624	3
C0542223	Loss of speech	3/178	37/21671	0.0810811	9.87139	4.91491	0.00344821	0.028291	0.0201766	5660/2760/54209	3
C0751964	Multiple Sclerosis, Primary Progressive	3/178	37/21671	0.0810811	9.87139	4.91491	0.00344821	0.028291	0.0201766	7471/3811/348	3
C1168198	Recurrent respiratory papillomatosis	3/178	37/21671	0.0810811	9.87139	4.91491	0.00344821	0.028291	0.0201766	3811/6890/6362	3
C1859726	ARTERIAL TORTUOSITY SYNDROME	3/178	37/21671	0.0810811	9.87139	4.91491	0.00344821	0.028291	0.0201766	1286/1285/348	3
C2895206	Autoimmune disease (systemic) NOS	3/178	37/21671	0.0810811	9.87139	4.91491	0.00344821	0.028291	0.0201766	3553/355/6737	3
C0023212	Left-Sided Heart Failure	5/178	123/21671	0.0406504	4.94907	3.99701	0.00349981	0.028291	0.0201766	341/3553/5742/348/3162	5
C2936349	Plaque, Amyloid	5/178	123/21671	0.0406504	4.94907	3.99701	0.00349981	0.028291	0.0201766	5973/28959/348/567/54209	5
C0017980	Glycosuria, Renal	2/178	11/21671	0.181818	22.1359	6.38084	0.0035144	0.028291	0.0201766	3106/3107	2
C0153458	malignant neoplasm of head of pancreas	2/178	11/21671	0.181818	22.1359	6.38084	0.0035144	0.028291	0.0201766	2323/348	2
C0153459	Malignant neoplasm of body of pancreas	2/178	11/21671	0.181818	22.1359	6.38084	0.0035144	0.028291	0.0201766	2323/348	2
C0153460	Malignant neoplasm of tail of pancreas	2/178	11/21671	0.181818	22.1359	6.38084	0.0035144	0.028291	0.0201766	2323/348	2
C0153463	Malignant neoplasm of other specified sites of pancreas	2/178	11/21671	0.181818	22.1359	6.38084	0.0035144	0.028291	0.0201766	2323/348	2
C0241908	Hematuria, Benign Familial	2/178	11/21671	0.181818	22.1359	6.38084	0.0035144	0.028291	0.0201766	1286/1285	2
C0271240	Blindness of one eye (disorder)	2/178	11/21671	0.181818	22.1359	6.38084	0.0035144	0.028291	0.0201766	3106/3105	2
C0272173	Myelokathexis	2/178	11/21671	0.181818	22.1359	6.38084	0.0035144	0.028291	0.0201766	2048/7852	2
C0342853	Sialuria	2/178	11/21671	0.181818	22.1359	6.38084	0.0035144	0.028291	0.0201766	5973/1118	2
C0546983	Post-Concussion Syndrome	2/178	11/21671	0.181818	22.1359	6.38084	0.0035144	0.028291	0.0201766	3553/348	2
C0563312	IgM monoclonal gammopathy of uncertain significance	2/178	11/21671	0.181818	22.1359	6.38084	0.0035144	0.028291	0.0201766	57379/7852	2
C0600178	External Carotid Artery Diseases	2/178	11/21671	0.181818	22.1359	6.38084	0.0035144	0.028291	0.0201766	348/3162	2
C0750986	Internal Carotid Artery Diseases	2/178	11/21671	0.181818	22.1359	6.38084	0.0035144	0.028291	0.0201766	348/3162	2
C0750987	Arterial Diseases, Common Carotid	2/178	11/21671	0.181818	22.1359	6.38084	0.0035144	0.028291	0.0201766	348/3162	2
C1274700	Postmenopausal frontal fibrosing alopecia	2/178	11/21671	0.181818	22.1359	6.38084	0.0035144	0.028291	0.0201766	3106/3105	2
C1510428	Cerebral abscess	2/178	11/21671	0.181818	22.1359	6.38084	0.0035144	0.028291	0.0201766	3553/3383	2
C4020705	Glomerulocystic kidney disease	2/178	11/21671	0.181818	22.1359	6.38084	0.0035144	0.028291	0.0201766	1286/1285	2
C4255374	Frontal fibrosing alopecia	2/178	11/21671	0.181818	22.1359	6.38084	0.0035144	0.028291	0.0201766	3106/3105	2
C0014378	Enterovirus Infections	7/178	237/21671	0.0295359	3.59591	3.65681	0.00352004	0.028291	0.0201766	3553/2048/3105/7453/567/3383/3107	7
C0262655	Recurrent urinary tract infection	7/178	237/21671	0.0295359	3.59591	3.65681	0.00352004	0.028291	0.0201766	57817/5453/3553/5742/3105/3383/6362	7
C0023530	Leukopenia	10/178	440/21671	0.0227273	2.76698	3.40772	0.00355804	0.0284788	0.0203105	2323/340061/3106/57379/64859/6401/231/3162/3383/7852	10
C0334533	Arteriovenous hemangioma	4/178	76/21671	0.0526316	6.40775	4.29771	0.00356418	0.0284788	0.0203105	3553/2048/348/3383	4
C1334177	Infiltrating Cervical Carcinoma	4/178	76/21671	0.0526316	6.40775	4.29771	0.00356418	0.0284788	0.0203105	3106/3135/3107/8837	4
C0220605	Adult Non-Hodgkin Lymphoma	9/178	370/21671	0.0243243	2.96142	3.46308	0.00360871	0.0287788	0.0205245	3135/5777/355/57379/115650/567/338339/7852/5698	9
C0497169	hiv-infection/aids	5/178	124/21671	0.0403226	4.90916	3.97276	0.00362308	0.0288374	0.0205663	3106/348/231/3107/7852	5
C0155877	Allergic asthma	9/178	371/21671	0.0242588	2.95344	3.45372	0.00367292	0.0291083	0.0207595	3106/6036/3553/57379/27181/1118/348/6890/6362	9
C0220612	Childhood Non-Hodgkin Lymphoma	9/178	371/21671	0.0242588	2.95344	3.45372	0.00367292	0.0291083	0.0207595	3135/5777/355/57379/115650/567/338339/7852/5698	9
C3250443	MYOTONIC DYSTROPHY 1	6/178	179/21671	0.0335196	4.08091	3.76668	0.00367833	0.0291083	0.0207595	3106/3811/6737/5696/348/7852	6
C0009088	Cluster Headache	3/178	38/21671	0.0789474	9.61162	4.83514	0.00372139	0.0292243	0.0208422	51237/6401/3383	3
C0009766	Allergic Conjunctivitis	3/178	38/21671	0.0789474	9.61162	4.83514	0.00372139	0.0292243	0.0208422	7114/2048/2358	3
C0684256	Bacterial sepsis	3/178	38/21671	0.0789474	9.61162	4.83514	0.00372139	0.0292243	0.0208422	140691/3553/7850	3
C1527231	Adrenomyeloneuropathy	3/178	38/21671	0.0789474	9.61162	4.83514	0.00372139	0.0292243	0.0208422	3553/3162/54209	3
C0036391	Schwartz-Jampel Syndrome	4/178	77/21671	0.0519481	6.32453	4.25943	0.00373575	0.0292255	0.020843	3106/3105/231/3107	4
C2347126	Microscopic Polyarteritis	4/178	77/21671	0.0519481	6.32453	4.25943	0.00373575	0.0292255	0.020843	3811/11024/3553/11027	4
C0242422	Parkinsonian Disorders	9/178	373/21671	0.0241287	2.9376	3.43511	0.00380402	0.0297031	0.0211837	216/3106/2512/3553/3105/348/7453/3162/54209	9
C0035258	Restless Legs Syndrome	5/178	126/21671	0.0396825	4.83124	3.92502	0.00387892	0.0302306	0.0215599	57817/2512/3553/83881/3162	5
C1522378	Leukemia, Large Granular Lymphocytic	4/178	78/21671	0.0512821	6.24345	4.22181	0.00391284	0.0304373	0.0217073	1844/3811/355/3804	4
C0333307	Superficial ulcer	7/178	242/21671	0.0289256	3.52161	3.58985	0.00394539	0.0306326	0.0218466	23601/101/3106/3553/348/5008/3663	7
C2316212	Cryopyrin-Associated Periodic Syndromes	3/178	39/21671	0.0769231	9.36517	4.75828	0.00400741	0.0310555	0.0221482	5973/3553/5336	3
C0018824	Heart valve disease	4/178	79/21671	0.0506329	6.16441	4.18484	0.00409553	0.0316193	0.0225503	3553/5777/6737/348	4
C4041080	Neurocognitive Disorders	4/178	79/21671	0.0506329	6.16441	4.18484	0.00409553	0.0316193	0.0225503	348/3162/3107/54209	4
C0006444	Bursitis	2/178	12/21671	0.166667	20.2912	6.08305	0.00419458	0.031671	0.0225871	3553/5742	2
C0151864	Disorder of pregnancy	2/178	12/21671	0.166667	20.2912	6.08305	0.00419458	0.031671	0.0225871	3553/3133	2
C0221259	Trichiasis	2/178	12/21671	0.166667	20.2912	6.08305	0.00419458	0.031671	0.0225871	3106/3553	2
C0342342	Idiopathic Hypoparathyroidism	2/178	12/21671	0.166667	20.2912	6.08305	0.00419458	0.031671	0.0225871	3106/3105	2
C0403440	Thin basement membrane disease	2/178	12/21671	0.166667	20.2912	6.08305	0.00419458	0.031671	0.0225871	1286/1285	2
C1096452	Neonatal Early-Onset Sepsis	2/178	12/21671	0.166667	20.2912	6.08305	0.00419458	0.031671	0.0225871	57817/3383	2
C1327920	Childhood Chronic Myelogenous Leukemia, BCR-ABL1 Positive	2/178	12/21671	0.166667	20.2912	6.08305	0.00419458	0.031671	0.0225871	2048/7852	2
C1519787	Undifferentiated Neuroblastoma	2/178	12/21671	0.166667	20.2912	6.08305	0.00419458	0.031671	0.0225871	3162/567	2
C1859736	Progressive spastic quadriplegia	2/178	12/21671	0.166667	20.2912	6.08305	0.00419458	0.031671	0.0225871	5660/2760	2
C1862596	Familial hypobetalipoproteinemia	2/178	12/21671	0.166667	20.2912	6.08305	0.00419458	0.031671	0.0225871	348/7941	2
C3532942	Mixed dementia	2/178	12/21671	0.166667	20.2912	6.08305	0.00419458	0.031671	0.0225871	1118/348	2
C4476910	Thin-cap fibroatheroma	2/178	12/21671	0.166667	20.2912	6.08305	0.00419458	0.031671	0.0225871	348/3162	2
C0005411	Biliary Atresia	6/178	184/21671	0.0326087	3.97002	3.68189	0.00420668	0.0317042	0.0226108	57817/2048/6401/3105/3383/3663	6
C0020429	Hyperalgesia	10/178	451/21671	0.0221729	2.69949	3.31914	0.00422928	0.0318152	0.02269	64805/51237/57817/64106/3553/2048/5742/4245/231/7852	10
C0151811	Subcutaneous nodule	4/178	80/21671	0.05	6.08736	4.14851	0.0042839	0.0318152	0.02269	3106/355/5696/348	4
C1821417	RESTING HEART RATE	4/178	80/21671	0.05	6.08736	4.14851	0.0042839	0.0318152	0.02269	79690/341/1285/4624	4
C2937365	Recurrent aphthous ulcer	4/178	80/21671	0.05	6.08736	4.14851	0.0042839	0.0318152	0.02269	3106/3553/355/6401	4
C0002965	Angina, Unstable	5/178	129/21671	0.0387597	4.71888	3.85527	0.00428658	0.0318152	0.02269	64805/6275/3553/3383/7852	5
C0740447	Diabetic peripheral neuropathy	5/178	129/21671	0.0387597	4.71888	3.85527	0.00428658	0.0318152	0.02269	64805/5973/7114/3553/231	5
C0206624	Hepatoblastoma	10/178	452/21671	0.0221239	2.69352	3.31122	0.00429495	0.0318152	0.02269	7471/57817/7114/3553/355/2048/348/231/3162/3383	10
C0023223	Leg Ulcer	3/178	40/21671	0.075	9.13104	4.68413	0.00430645	0.0318152	0.02269	3553/6401/3383	3
C0700613	Anxiety state	3/178	40/21671	0.075	9.13104	4.68413	0.00430645	0.0318152	0.02269	3553/348/7850	3
C3899655	Childhood Langerhans Cell Histiocytosis	3/178	40/21671	0.075	9.13104	4.68413	0.00430645	0.0318152	0.02269	3553/2048/3105	3
C3900100	Adult Langerhans Cell Histiocytosis	3/178	40/21671	0.075	9.13104	4.68413	0.00430645	0.0318152	0.02269	3553/2048/3105	3
C0876973	Infectious Lung Disorder	6/178	185/21671	0.0324324	3.94856	3.66529	0.00431874	0.0318488	0.0227139	7471/3553/1118/348/7852/5008	6
C0001342	Acute periodontitis	5/178	130/21671	0.0384615	4.68258	3.8325	0.004429	0.0325453	0.0232106	3553/3105/3107/7850/3663	5
C0017612	Glaucoma, Open-Angle	5/178	130/21671	0.0384615	4.68258	3.8325	0.004429	0.0325453	0.0232106	355/6891/348/231/6890	5
C3875321	Inflammatory dermatosis	9/178	382/21671	0.0235602	2.86839	3.35284	0.00444008	0.0325685	0.0232272	3553/5777/6737/348/7293/3162/3383/8837/5008	9
C1720830	Painful Bladder Syndrome	4/178	81/21671	0.0493827	6.01221	4.11279	0.00447803	0.0327884	0.0233841	3553/6401/3383/7852	4
C0920646	Ischemia of kidney	5/178	131/21671	0.0381679	4.64684	3.80996	0.00457477	0.0333189	0.0237624	3553/5777/6401/3162/3383	5
C4552091	Polyarthritis, Juvenile, Rheumatoid Factor Negative	5/178	131/21671	0.0381679	4.64684	3.80996	0.00457477	0.0333189	0.0237624	1844/113/54757/7852/5008	5
C4704862	Polyarthritis, Juvenile, Rheumatoid Factor Positive	5/178	131/21671	0.0381679	4.64684	3.80996	0.00457477	0.0333189	0.0237624	1844/113/54757/7852/5008	5
C0027726	Nephrotic Syndrome	9/178	384/21671	0.0234375	2.85345	3.33488	0.00459209	0.0333437	0.0237801	51237/3553/1286/1285/8542/348/567/7941/1071	9
C0036982	Shock, Hemorrhagic	3/178	41/21671	0.0731707	8.90833	4.61253	0.00461869	0.0333437	0.0237801	3553/3162/3383	3
C0272178	Drug-induced neutropenia	3/178	41/21671	0.0731707	8.90833	4.61253	0.00461869	0.0333437	0.0237801	10866/3106/6891	3
C1277187	Left ventricular systolic dysfunction	3/178	41/21671	0.0731707	8.90833	4.61253	0.00461869	0.0333437	0.0237801	3135/3553/348	3
C1696708	Prehypertension	3/178	41/21671	0.0731707	8.90833	4.61253	0.00461869	0.0333437	0.0237801	6401/348/7852	3
C0221505	Lesion of brain	6/178	188/21671	0.0319149	3.88555	3.61619	0.00466819	0.0335366	0.0239176	3553/6368/6401/348/3383/5008	6
C0009763	Conjunctivitis	4/178	82/21671	0.0487805	5.93889	4.07766	0.00467801	0.0335366	0.0239176	3106/5696/115650/5698	4
C0406317	Chronic small plaque psoriasis	4/178	82/21671	0.0487805	5.93889	4.07766	0.00467801	0.0335366	0.0239176	3135/3553/355/3107	4
C0887833	Carcinoma, Pancreatic Ductal	4/178	82/21671	0.0487805	5.93889	4.07766	0.00467801	0.0335366	0.0239176	51237/1844/3553/355	4
C0011644	Scleroderma	8/178	316/21671	0.0253165	3.08221	3.39319	0.00470985	0.0337061	0.0240386	3106/3811/3135/3553/2048/3105/3383/2358	8
C1853926	NONAKA MYOPATHY	5/178	132/21671	0.0378788	4.61164	3.78764	0.00472393	0.0337482	0.0240685	5973/1844/3804/4624/3383	5
C0153014	Non-arthropod borne lymphocytic choriomeningitis	5/178	133/21671	0.037594	4.57696	3.76555	0.0048765	0.0339661	0.024224	2995/5699/355/5696/3105	5
C3840565	Autoimmune thyroid disease (AITD)	5/178	133/21671	0.037594	4.57696	3.76555	0.0048765	0.0339661	0.024224	3106/6275/7253/3105/3383	5
C0016382	Flushing	4/178	83/21671	0.0481928	5.86733	4.0431	0.0048839	0.0339661	0.024224	216/3553/5742/6401	4
C0029227	Delirium, Dementia, Amnestic, Cognitive Disorders	4/178	83/21671	0.0481928	5.86733	4.0431	0.0048839	0.0339661	0.024224	348/3162/3107/54209	4
C0033770	Prune Belly Syndrome	4/178	83/21671	0.0481928	5.86733	4.0431	0.0048839	0.0339661	0.024224	3553/6401/3383/7852	4
C0085632	Apathy	4/178	83/21671	0.0481928	5.86733	4.0431	0.0048839	0.0339661	0.024224	348/2760/8837/54209	4
C0001614	Adrenal Cortex Diseases	2/178	13/21671	0.153846	18.7303	5.8193	0.00493056	0.0339661	0.024224	216/3553	2
C0023645	Lichen planus follicularis	2/178	13/21671	0.153846	18.7303	5.8193	0.00493056	0.0339661	0.024224	3553/23780	2
C0149886	Seizure, Febrile, Simple	2/178	13/21671	0.153846	18.7303	5.8193	0.00493056	0.0339661	0.024224	3553/348	2
C0340170	Complicated pneumoconiosis	2/178	13/21671	0.153846	18.7303	5.8193	0.00493056	0.0339661	0.024224	3553/3383	2
C0586354	Esophageal dysplasia	2/178	13/21671	0.153846	18.7303	5.8193	0.00493056	0.0339661	0.024224	3553/7852	2
C0595905	cortex bone disorders	2/178	13/21671	0.153846	18.7303	5.8193	0.00493056	0.0339661	0.024224	216/3553	2
C0700502	Acquired hypothyroidism	2/178	13/21671	0.153846	18.7303	5.8193	0.00493056	0.0339661	0.024224	7253/5698	2
C0856738	Triple vessel disease	2/178	13/21671	0.153846	18.7303	5.8193	0.00493056	0.0339661	0.024224	567/1071	2
C1304140	Familial psoriasis	2/178	13/21671	0.153846	18.7303	5.8193	0.00493056	0.0339661	0.024224	3106/3107	2
C1708502	Induced cataract	2/178	13/21671	0.153846	18.7303	5.8193	0.00493056	0.0339661	0.024224	3553/231	2
C0016977	Gall Bladder Diseases	3/178	42/21671	0.0714286	8.69623	4.54334	0.00494428	0.0339661	0.024224	348/151306/1071	3
C0024441	Macular Holes	3/178	42/21671	0.0714286	8.69623	4.54334	0.00494428	0.0339661	0.024224	355/3105/348	3
C0276226	Herpes encephalitis	3/178	42/21671	0.0714286	8.69623	4.54334	0.00494428	0.0339661	0.024224	340061/140691/348	3
C0342882	Familial hypercholesterolemia - heterozygous	3/178	42/21671	0.0714286	8.69623	4.54334	0.00494428	0.0339661	0.024224	348/7941/1071	3
C0346421	Chronic eosinophilic leukemia	3/178	42/21671	0.0714286	8.69623	4.54334	0.00494428	0.0339661	0.024224	64805/27181/5008	3
C2882221	Acute pulmonary embolism	3/178	42/21671	0.0714286	8.69623	4.54334	0.00494428	0.0339661	0.024224	3553/6401/3162	3
C3495919	Enthesitis-Related Arthritis	3/178	42/21671	0.0714286	8.69623	4.54334	0.00494428	0.0339661	0.024224	3106/3135/3553	3
C0005956	Bone Marrow Diseases	4/178	84/21671	0.047619	5.79749	4.00911	0.0050958	0.0348905	0.0248832	3135/348/3107/7852	4
C0751713	Inclusion Body Myopathy, Sporadic	4/178	84/21671	0.047619	5.79749	4.00911	0.0050958	0.0348905	0.0248832	3106/3553/348/7852	4
C0276289	Zika Virus Infection	6/178	192/21671	0.03125	3.8046	3.55227	0.00516597	0.0353122	0.025184	340061/140691/3553/2048/3133/3162	6
C0008373	Cholesteatoma	5/178	135/21671	0.037037	4.50916	3.72201	0.0051921	0.0353734	0.0252276	23601/3553/355/338339/4065	5
C0201657	C-reactive protein measurement	5/178	135/21671	0.037037	4.50916	3.72201	0.0051921	0.0353734	0.0252276	3106/341/348/1071/54209	5
C0376544	Hematopoietic Neoplasms	8/178	322/21671	0.0248447	3.02477	3.33125	0.00526291	0.0357584	0.0255022	6275/51513/355/2048/51348/83881/3162/3663	8
C0011608	Dermatitis Herpetiformis	3/178	43/21671	0.0697674	8.49399	4.47641	0.00528338	0.0357584	0.0255022	6891/6401/3383	3
C0035851	Root Resorption	3/178	43/21671	0.0697674	8.49399	4.47641	0.00528338	0.0357584	0.0255022	3553/5742/54757	3
C4303092	Cystic echinococcosis	3/178	43/21671	0.0697674	8.49399	4.47641	0.00528338	0.0357584	0.0255022	3135/6891/6890	3
C0014869	Peptic Esophagitis	4/178	85/21671	0.0470588	5.72928	3.97566	0.00531377	0.0357875	0.0255229	3553/348/3162/5698	4
C0595936	Aqueous Humor Disorders	4/178	85/21671	0.0470588	5.72928	3.97566	0.00531377	0.0357875	0.0255229	57817/6401/3383/7852	4
C0853662	Oestrogen deficiency	4/178	85/21671	0.0470588	5.72928	3.97566	0.00531377	0.0357875	0.0255229	3553/355/348/5336	4
C0206139	Lichen Planus, Oral	7/178	257/21671	0.0272374	3.31607	3.39907	0.00545747	0.0365901	0.0260953	7253/3811/3553/6737/6401/3383/3107	7
C0014038	Encephalitis	8/178	324/21671	0.0246914	3.0061	3.31092	0.00545789	0.0365901	0.0260953	57817/3106/3553/355/348/3162/567/3383	8
C0279628	Adenocarcinoma Of Esophagus	10/178	468/21671	0.0213675	2.60144	3.18731	0.00545961	0.0365901	0.0260953	3553/355/2048/5742/57379/3105/3383/3107/7852/151306	10
C0013221	Drug toxicity	4/178	86/21671	0.0465116	5.66266	3.94274	0.00553789	0.0370544	0.0264264	3106/3162/567/3107	4
C0345905	Intrahepatic Cholangiocarcinoma	10/178	470/21671	0.0212766	2.59037	3.17219	0.00562107	0.0374301	0.0266944	216/3106/6275/3553/2048/6891/3804/22846/3107/7852	10
C3714758	Juvenile psoriatic arthritis	5/178	138/21671	0.0362319	4.41113	3.65828	0.00569224	0.0374301	0.0266944	1844/113/54757/7852/5008	5
C0341439	Chronic liver disease	6/178	196/21671	0.0306122	3.72695	3.49004	0.00570165	0.0374301	0.0266944	57817/3811/3553/57379/3383/7852	6
C0242339	Dyslipidemias	10/178	471/21671	0.0212314	2.58487	3.16465	0.00570319	0.0374301	0.0266944	5973/3553/3105/348/5360/3162/7941/10062/5336/1071	10
C0006105	Brain Abscess	2/178	14/21671	0.142857	17.3925	5.58341	0.0057214	0.0374301	0.0266944	3553/3383	2
C0030489	Paraproteinemias	2/178	14/21671	0.142857	17.3925	5.58341	0.0057214	0.0374301	0.0266944	3106/567	2
C0085273	Erythema Infectiosum	2/178	14/21671	0.142857	17.3925	5.58341	0.0057214	0.0374301	0.0266944	3105/8542	2
C0085574	Palindromic rheumatism	2/178	14/21671	0.142857	17.3925	5.58341	0.0057214	0.0374301	0.0266944	3553/3105	2
C0155164	Conjunctival scar	2/178	14/21671	0.142857	17.3925	5.58341	0.0057214	0.0374301	0.0266944	3804/3107	2
C0221248	Tophus	2/178	14/21671	0.142857	17.3925	5.58341	0.0057214	0.0374301	0.0266944	3106/3553	2
C0233522	Inappropriate behavior	2/178	14/21671	0.142857	17.3925	5.58341	0.0057214	0.0374301	0.0266944	2760/54209	2
C0524988	Schnitzler Syndrome	2/178	14/21671	0.142857	17.3925	5.58341	0.0057214	0.0374301	0.0266944	57817/3553	2
C1333116	Colorectal Traditional Serrated Adenoma	2/178	14/21671	0.142857	17.3925	5.58341	0.0057214	0.0374301	0.0266944	2048/84870	2
C4749367	Mesial temporal lobe epilepsy with hippocampal sclerosis	2/178	14/21671	0.142857	17.3925	5.58341	0.0057214	0.0374301	0.0266944	3553/348	2
C0041755	Adverse reaction to drug	4/178	87/21671	0.045977	5.59757	3.91033	0.00576825	0.0375885	0.0268074	3106/3162/567/3107	4
C1867743	Premature coronary artery atherosclerosis	4/178	87/21671	0.045977	5.59757	3.91033	0.00576825	0.0375885	0.0268074	100507392/6401/348/1071	4
C0206708	Cervical Intraepithelial Neoplasia	9/178	398/21671	0.0226131	2.75308	3.21232	0.005773	0.0375885	0.0268074	340061/3811/3135/3553/5696/3105/6890/8837/5698	9
C0276496	Familial Alzheimer Disease (FAD)	7/178	260/21671	0.0269231	3.27781	3.36261	0.00580586	0.0377427	0.0269173	274/341/3553/348/3162/5336/54209	7
C0039103	Synovitis	6/178	197/21671	0.0304569	3.70804	3.47474	0.00584168	0.0379157	0.0270407	101/3106/3553/5742/3383/151306	6
C0014170	Endometrial Neoplasms	7/178	261/21671	0.0268199	3.26525	3.35057	0.00592561	0.0383104	0.0273222	216/6275/3553/355/231/8837/7852	7
C0023281	Leishmaniasis	6/178	198/21671	0.030303	3.68931	3.45954	0.00598421	0.0383104	0.0273222	216/3553/5777/3162/3107/2358	6
C0034152	Henoch-Schoenlein Purpura	6/178	198/21671	0.030303	3.68931	3.45954	0.00598421	0.0383104	0.0273222	3106/3737/3553/2048/3105/3383	6
C0699949	airway disease	6/178	198/21671	0.030303	3.68931	3.45954	0.00598421	0.0383104	0.0273222	64805/3553/348/231/3383/7852	6
C4049446	Neointimal hyperplasia	6/178	198/21671	0.030303	3.68931	3.45954	0.00598421	0.0383104	0.0273222	3553/6401/348/3162/10062/1071	6
C0004941	Behavioral Symptoms	3/178	45/21671	0.0666667	8.11648	4.34885	0.00600273	0.0383104	0.0273222	3553/348/54209	3
C0032051	Placental Insufficiency	3/178	45/21671	0.0666667	8.11648	4.34885	0.00600273	0.0383104	0.0273222	3553/3162/2358	3
C0078911	AIDS-Associated Nephropathy	3/178	45/21671	0.0666667	8.11648	4.34885	0.00600273	0.0383104	0.0273222	2048/8542/348	3
C4049006	Selective immunoglobulin A deficiency	3/178	45/21671	0.0666667	8.11648	4.34885	0.00600273	0.0383104	0.0273222	3106/57379/3107	3
C0030481	Tropical Spastic Paraparesis	4/178	88/21671	0.0454545	5.53396	3.87842	0.00600491	0.0383104	0.0273222	3135/3133/3107/8837	4
C4020969	Inflammatory abnormality of the eye	4/178	88/21671	0.0454545	5.53396	3.87842	0.00600491	0.0383104	0.0273222	3106/3553/3105/231	4
C0206664	Teratocarcinoma	5/178	141/21671	0.035461	4.31728	3.59633	0.00622545	0.0396559	0.0282818	2048/3105/3133/348/567	5
C2936664	Acquired Hypogammaglobulinemia	4/178	89/21671	0.0449438	5.47178	3.84699	0.00624794	0.0397377	0.0283401	57379/115650/1118/3107	4
C2826323	Refractory Cytopenia of Childhood	7/178	264/21671	0.0265152	3.22815	3.31481	0.00629596	0.0399133	0.0284654	3553/3105/970/567/3383/3107/7852	7
C0004763	Barrett Esophagus	10/178	478/21671	0.0209205	2.54701	3.11245	0.00630466	0.0399133	0.0284654	3384/6275/3553/355/5742/6737/57379/3383/7852/151306	10
C1292769	Precursor B-cell lymphoblastic leukemia	10/178	478/21671	0.0209205	2.54701	3.11245	0.00630466	0.0399133	0.0284654	2323/51513/57379/3105/115650/970/3162/3383/3107/5305	10
C0014179	Endometritis	3/178	46/21671	0.0652174	7.94003	4.28799	0.00638325	0.0401637	0.028644	6275/3553/3383	3
C0588008	Severe depression	3/178	46/21671	0.0652174	7.94003	4.28799	0.00638325	0.0401637	0.028644	3553/348/8837	3
C1333782	Gastric Mucosa-Associated Lymphoid Tissue Lymphoma	3/178	46/21671	0.0652174	7.94003	4.28799	0.00638325	0.0401637	0.028644	3553/2048/7852	3
C3489791	Parkinson Disease, Familial, Type 1	3/178	46/21671	0.0652174	7.94003	4.28799	0.00638325	0.0401637	0.028644	2048/348/3383	3
C2986665	Early-Stage Breast Carcinoma	5/178	142/21671	0.0352113	4.28687	3.57607	0.00641073	0.0402751	0.0287234	216/6275/6891/348/6890	5
C0020517	Hypersensitivity	4/178	90/21671	0.0444444	5.41099	3.81603	0.00649743	0.0406954	0.0290232	3106/3553/231/7850	4
C0022575	Keratoconjunctivitis Sicca	4/178	90/21671	0.0444444	5.41099	3.81603	0.00649743	0.0406954	0.0290232	3106/355/6737/567	4
C0003509	Aortitis	2/178	15/21671	0.133333	16.233	5.37071	0.00656614	0.0408152	0.0291086	3106/3553	2
C0033802	Pseudogout	2/178	15/21671	0.133333	16.233	5.37071	0.00656614	0.0408152	0.0291086	3106/3105	2
C0038363	Aphthous Stomatitis	2/178	15/21671	0.133333	16.233	5.37071	0.00656614	0.0408152	0.0291086	3106/3553	2
C1096666	Thyroid cancer metastatic	2/178	15/21671	0.133333	16.233	5.37071	0.00656614	0.0408152	0.0291086	7253/3383	2
C3805083	Portal fibrosis	2/178	15/21671	0.133333	16.233	5.37071	0.00656614	0.0408152	0.0291086	3553/3107	2
C0019069	Hemophilia A	5/178	143/21671	0.034965	4.25689	3.55599	0.00659985	0.0409629	0.0292139	3106/3553/3105/3162/3383	5
C0393639	Hashimoto's encephalitis	3/178	47/21671	0.0638298	7.7711	4.22893	0.00677785	0.0419708	0.0299328	7253/6737/231	3
C0002875	Cooley's anemia	5/178	144/21671	0.0347222	4.22733	3.5361	0.00679285	0.0419708	0.0299328	57817/355/1118/348/6362	5
C0011882	Diabetic Neuropathies	5/178	144/21671	0.0347222	4.22733	3.5361	0.00679285	0.0419708	0.0299328	3553/348/231/3162/256076	5
C0079772	T-Cell Lymphoma	10/178	485/21671	0.0206186	2.51025	3.06116	0.00695448	0.0429051	0.030599	6275/3135/3553/5777/355/115650/970/567/7852/5698	10
C0740392	Infarction, Middle Cerebral Artery	5/178	145/21671	0.0344828	4.19818	3.51638	0.00698976	0.0430582	0.0307083	57817/3553/348/3162/3383	5
C0006309	Brucellosis	4/178	92/21671	0.0434783	5.29336	3.75549	0.00701603	0.0431554	0.0307776	57817/3106/3553/6401	4
C0019193	Hepatitis, Toxic	9/178	412/21671	0.0218447	2.65953	3.09494	0.00717628	0.0437067	0.0311708	101/3106/2512/3553/3105/348/3162/10062/7850	9
C4279912	Chemically-Induced Liver Toxicity	9/178	412/21671	0.0218447	2.65953	3.09494	0.00717628	0.0437067	0.0311708	101/3106/2512/3553/3105/348/3162/10062/7850	9
C0343752	Acute HIV infection	3/178	48/21671	0.0625	7.6092	4.1716	0.00718665	0.0437067	0.0311708	3106/355/7852	3
C0431129	Adamantinous Craniopharyngioma	3/178	48/21671	0.0625	7.6092	4.1716	0.00718665	0.0437067	0.0311708	355/2048/7852	3
C0853112	Chronic infection with HIV	3/178	48/21671	0.0625	7.6092	4.1716	0.00718665	0.0437067	0.0311708	355/3107/7852	3
C1961835	Gaucher Disease, Type 1	3/178	48/21671	0.0625	7.6092	4.1716	0.00718665	0.0437067	0.0311708	57817/5660/1118	3
C3714772	Recurrent fevers	3/178	48/21671	0.0625	7.6092	4.1716	0.00718665	0.0437067	0.0311708	3553/5696/5698	3
C0338908	Mixed anxiety and depressive disorder	5/178	146/21671	0.0342466	4.16942	3.49684	0.00719064	0.0437067	0.0311708	3553/355/116071/348/3383	5
C0006272	Bronchiolitis Obliterans	4/178	93/21671	0.0430108	5.23644	3.72587	0.0072853	0.0439599	0.0313513	6401/3105/3383/7852	4
C0398686	Primary immune deficiency disorder	4/178	93/21671	0.0430108	5.23644	3.72587	0.0072853	0.0439599	0.0313513	3553/970/3107/7852	4
C0836924	Thrombocytosis	4/178	93/21671	0.0430108	5.23644	3.72587	0.0072853	0.0439599	0.0313513	64805/340061/3553/7852	4
C0016057	Fibrosarcoma	9/178	413/21671	0.0217918	2.65309	3.08674	0.0072857	0.0439599	0.0313513	216/5660/7114/3553/2048/115650/231/3383/3107	9
C3658290	Drug-Induced Acute Liver Injury	9/178	413/21671	0.0217918	2.65309	3.08674	0.0072857	0.0439599	0.0313513	101/3106/2512/3553/3105/348/3162/10062/7850	9
C0200641	Blood basophil count (lab test)	7/178	272/21671	0.0257353	3.1332	3.22189	0.00736798	0.0443913	0.031659	10866/100507392/3106/285180/79895/3105/115727	7
C0024266	Lymphocytic Choriomeningitis	5/178	147/21671	0.0340136	4.14106	3.47748	0.00739551	0.044492	0.0317308	2995/5699/355/5696/3105	5
C0021845	Intestinal Perforation	2/178	16/21671	0.125	15.2184	5.17753	0.00746387	0.0445128	0.0317457	6737/6401	2
C0158551	Embryonal nuclear cataract (disorder)	2/178	16/21671	0.125	15.2184	5.17753	0.00746387	0.0445128	0.0317457	1414/2512	2
C0237653	Immunologic hypersensitivity	2/178	16/21671	0.125	15.2184	5.17753	0.00746387	0.0445128	0.0317457	3106/355	2
C1112472	Aeromonas hydrophila infection	2/178	16/21671	0.125	15.2184	5.17753	0.00746387	0.0445128	0.0317457	340061/6036	2
C1377919	Stage IV Nasopharyngeal Carcinoma	2/178	16/21671	0.125	15.2184	5.17753	0.00746387	0.0445128	0.0317457	7852/5698	2
C1868528	Orthostatic hypotension due to autonomic dysfunction	2/178	16/21671	0.125	15.2184	5.17753	0.00746387	0.0445128	0.0317457	5660/567	2
C0030354	Papilloma	7/178	273/21671	0.025641	3.12172	3.21051	0.00751093	0.0447286	0.0318996	216/3811/3135/2048/348/3383/6362	7
C0035204	Respiration Disorders	6/178	208/21671	0.0288462	3.51194	3.31273	0.00755234	0.0447986	0.0319495	3135/3553/2048/5742/116071/2358	6
C0035436	Rheumatic Fever	4/178	94/21671	0.0425532	5.18073	3.69668	0.00756129	0.0447986	0.0319495	3553/6737/3105/3383	4
C0221013	Mastocytosis, Systemic	4/178	94/21671	0.0425532	5.18073	3.69668	0.00756129	0.0447986	0.0319495	5777/3162/338339/5008	4
C0035305	Retinal Detachment	5/178	148/21671	0.0337838	4.11308	3.45829	0.00760442	0.0447986	0.0319495	64805/3553/355/3105/3107	5
C0029899	Otosclerosis	3/178	49/21671	0.0612245	7.45391	4.11589	0.00760977	0.0447986	0.0319495	3106/3105/3107	3
C0080233	Tooth Loss	3/178	49/21671	0.0612245	7.45391	4.11589	0.00760977	0.0447986	0.0319495	3553/348/567	3
C1960272	Latent autoimmune diabetes mellitus in adult	3/178	49/21671	0.0612245	7.45391	4.11589	0.00760977	0.0447986	0.0319495	3106/3811/3107	3
C2237660	exudative macular degeneration	3/178	49/21671	0.0612245	7.45391	4.11589	0.00760977	0.0447986	0.0319495	1285/348/1071	3
C0149939	Obstructive nephropathy	4/178	95/21671	0.0421053	5.1262	3.6679	0.00784408	0.0460275	0.0328259	6275/2048/567/5008	4
C0152020	Gastroparesis	4/178	95/21671	0.0421053	5.1262	3.6679	0.00784408	0.0460275	0.0328259	3553/355/348/3162	4
C1262760	Hepatitis, Drug-Induced	9/178	418/21671	0.0215311	2.62135	3.04611	0.00785208	0.0460275	0.0328259	101/3106/2512/3553/3105/348/3162/10062/7850	9
C0085096	Peripheral Vascular Diseases	5/178	150/21671	0.0333333	4.05824	3.4204	0.00803451	0.0469048	0.0334516	64805/3553/348/567/3383	5
C0242706	Hyperoxia	3/178	50/21671	0.06	7.30483	4.06173	0.00804733	0.0469048	0.0334516	3553/355/8837	3
C0920028	Leukaemia recurrent	3/178	50/21671	0.06	7.30483	4.06173	0.00804733	0.0469048	0.0334516	3106/3811/3107	3
C2936858	Congenital adrenal hyperplasia due to 21 hydroxylase deficiency	3/178	50/21671	0.06	7.30483	4.06173	0.00804733	0.0469048	0.0334516	3106/3105/2358	3
C0037299	Skin Ulcer	5/178	151/21671	0.0331126	4.03136	3.4017	0.00825577	0.0480516	0.0342695	3106/6891/6890/3663/6892	5
C0334619	HODGKIN'S AND NON-HODGKIN'S LYMPHOMA	2/178	17/21671	0.117647	14.3232	5.00098	0.00841367	0.0487637	0.0347773	2323/355	2
C0400877	Postoperative ileus	2/178	17/21671	0.117647	14.3232	5.00098	0.00841367	0.0487637	0.0347773	3553/3162	2
C1274648	Segmental vitiligo	2/178	17/21671	0.117647	14.3232	5.00098	0.00841367	0.0487637	0.0347773	3135/3553	2
C0919747	Cytokine storm	4/178	97/21671	0.0412371	5.0205	3.61153	0.00843034	0.0487721	0.0347833	140691/3553/5008/3663	4
C1843013	Alzheimer disease, familial, type 3	6/178	213/21671	0.028169	3.4295	3.24267	0.00843882	0.0487721	0.0347833	3553/355/6891/348/7852/54209	6
C0019101	Hemorrhagic Fever with Renal Syndrome	3/178	51/21671	0.0588235	7.1616	4.00905	0.00849943	0.0489163	0.0348862	3384/3106/3105	3
C0032533	Polymyalgia Rheumatica	3/178	51/21671	0.0588235	7.1616	4.00905	0.00849943	0.0489163	0.0348862	3553/3105/3383	3
C0282513	Primary Progressive Aphasia (disorder)	3/178	51/21671	0.0588235	7.1616	4.00905	0.00849943	0.0489163	0.0348862	341/348/54209	3
C0032002	Pituitary Diseases	5/178	153/21671	0.0326797	3.97867	3.36479	0.0087109	0.0499239	0.0356048	3553/2048/348/3162/85315	5
C0042870	Vitamin D Deficiency	5/178	153/21671	0.0326797	3.97867	3.36479	0.0087109	0.0499239	0.0356048	57817/3553/3105/8542/348	5
C0079745	Lymphoma, Large-Cell, Follicular	5/178	153/21671	0.0326797	3.97867	3.36479	0.0087109	0.0499239	0.0356048	216/526/355/57379/970	5
C0040053	Thrombosis	4/178	98/21671	0.0408163	4.96927	3.58393	0.00873393	0.0499863	0.0356492	64805/3553/5742/3162	4
[truncated: 25 more columns]

## Sheet: LumA
DisGeNET																										HDO
LumA-ceRM1													LumA-ceRM2													LumA-ceRM1													LumA-ceRM2
ID	Description	GeneRatio	BgRatio	RichFactor	FoldEnrichment	zScore	pvalue	p.adjust	qvalue	geneID	Count		ID	Description	GeneRatio	BgRatio	RichFactor	FoldEnrichment	zScore	pvalue	p.adjust	qvalue	geneID	Count		ID	Description	GeneRatio	BgRatio	RichFactor	FoldEnrichment	zScore	pvalue	p.adjust	qvalue	geneID	Count		ID	Description	GeneRatio	BgRatio	RichFactor	FoldEnrichment	zScore	pvalue	p.adjust	qvalue	geneID
C1854912	Short long bone	9/286	42/21671	0.214286	16.237	11.4305	3.26161e-09	1.46446e-05	1.248e-05	4921/132884/2121/5745/285590/633/9719/3339/4920	9		/	/	/	/	/	/	/	/	/	/	/	/		DOID:0080006	bone development disease	17/144	228/7865	0.0745614	4.0724	6.4291	7.81707e-07	0.000408051	0.000368636	4921/132884/2121/4882/5745/285590/633/649/9719/4322/8823/6474/3339/23187/7291/4920/117581	17		DOID:0080326	familial hypertrophic cardiomyopathy	4/28	41/7865	0.097561	27.4042	10.1316	1.18893e-05	0.00180717	0.00130156	2318/4626/4622/4634
C0009081	Congenital clubfoot	18/286	285/21671	0.0631579	4.78565	7.4397	5.11022e-08	0.000113067	9.63541e-05	1292/4620/132884/2121/8642/9935/91179/55679/1291/340075/285590/148113/259232/29940/3339/8516/6387/7169	18															DOID:3627	aortic aneurysm	9/144	89/7865	0.101124	5.52317	5.86039	3.29645e-05	0.00860374	0.00777269	4837/59/4629/4323/4314/5054/4322/7078/30008	9		DOID:11720	distal myopathy	3/28	21/7865	0.142857	40.1276	10.7312	5.14944e-05	0.00391357	0.00281864	2318/4626/4622
C4707243	Familial thoracic aortic aneurysm and aortic dissection	9/286	59/21671	0.152542	11.5586	9.39162	7.55459e-08	0.000113067	9.63541e-05	100132116/80781/59/4629/11117/633/5311/7043/30008	9		LumA-ceRM3													DOID:520	aortic disease	9/144	98/7865	0.0918367	5.01594	5.46311	7.0984e-05	0.0117437	0.0106094	4837/59/4629/4323/4314/5054/4322/7078/30008	9		DOID:0080719	congenital myopathy 6	2/28	10/7865	0.2	56.1786	10.4357	0.000540418	0.00912705	0.0065735	4626/4622
C0878659	Disproportionate short stature	10/286	86/21671	0.116279	8.81078	8.39316	2.0049e-07	0.00022505	0.000191785	579/4921/132884/2121/4882/5745/285590/4322/3339/4920	10		ID	Description	GeneRatio	BgRatio	RichFactor	FoldEnrichment	zScore	pvalue	p.adjust	qvalue	geneID	Count		DOID:0080326	familial hypertrophic cardiomyopathy	6/144	41/7865	0.146341	7.99289	6.13056	8.99903e-05	0.0117437	0.0106094	91624/4620/10398/4619/5350/80206	6		DOID:0110454	dilated cardiomyopathy 1S	2/28	10/7865	0.2	56.1786	10.4357	0.000540418	0.00912705	0.0065735	4626/4622
C0009917	Contracture	11/286	111/21671	0.0990991	7.50901	7.95078	2.56867e-07	0.000230666	0.000196571	1292/4620/1291/633/259232/5054/9719/7070/3339/1490/7169	11		C3714514	Infection	27/178	491/21671	0.0549898	6.69486	11.6159	5.39299e-15	2.21922e-11	1.5827e-11	2323/57817/3106/341/2512/3811/3135/3553/355/6891/5742/57379/6401/5696/3105/1118/3133/10170/348/7293/3162/3383/3107/7850/6890/7852/5008	27		DOID:0080007	bone deterioration disease	4/144	19/7865	0.210526	11.4985	6.25673	0.00033727	0.0256503	0.0231727	4314/4322/5069/11096	4		DOID:0111267	hyaline body myopathy	2/28	10/7865	0.2	56.1786	10.4357	0.000540418	0.00912705	0.0065735	4626/4622
C0006287	Bronchopulmonary Dysplasia	20/286	423/21671	0.0472813	3.58263	6.20343	9.89994e-07	0.000664821	0.000566552	5961/1902/4016/3084/2252/3491/815/5054/7057/7078/7070/163782/10846/8839/2561/2922/1490/6387/4325/9242	20		C1290884	Inflammatory disorder	22/178	391/21671	0.056266	6.85023	10.6235	1.37369e-12	2.82637e-09	2.01571e-09	340061/57817/3106/122618/7253/5699/3811/3553/5777/57379/6368/6401/5696/3105/3162/567/3383/7941/3107/7852/5698/54209	22		DOID:90	degenerative disc disease	4/144	19/7865	0.210526	11.4985	6.25673	0.00033727	0.0256503	0.0231727	4314/4322/5069/11096	4		DOID:0111269	autosomal dominant hyaline body myopathy	2/28	10/7865	0.2	56.1786	10.4357	0.000540418	0.00912705	0.0065735	4626/4622
C0269102	Endometrioma	16/286	279/21671	0.0573477	4.34539	6.50401	1.03647e-06	0.000664821	0.000566552	59/149111/4907/389558/2846/4314/2192/715/7070/3554/5999/10468/5069/6876/79625/25802	16		C0151449	Primary SjC6gren's syndrome	19/178	312/21671	0.0608974	7.41409	10.3852	1.30044e-11	1.78377e-08	1.27215e-08	3106/23526/3553/5777/355/6891/5742/6737/3105/115650/970/348/567/3383/3107/7852/6362/5698/3663	19		DOID:7693	abdominal aortic aneurysm	6/144	54/7865	0.111111	6.06867	5.10392	0.000425207	0.0256503	0.0231727	4837/4629/4323/4314/5054/4322	6		DOID:0111602	distal arthrogryposis type 2B3	2/28	10/7865	0.2	56.1786	10.4357	0.000540418	0.00912705	0.0065735	4626/4622
C0024796	Marfan Syndrome	11/286	130/21671	0.0846154	6.41154	7.15677	1.26434e-06	0.00070961	0.00060472	3915/59/4323/3491/1264/4314/4322/7057/7078/7043/6876	11		C0151517	Complete atrioventricular block	20/178	403/21671	0.0496278	6.04204	9.29794	1.4419e-10	1.23864e-07	8.83375e-08	340061/3106/6275/140691/3811/3135/3553/355/6891/6737/3804/3105/3133/3107/393/6890/5698/3663/151306/6892	20		DOID:14004	thoracic aortic aneurysm	5/144	36/7865	0.138889	7.58584	5.40848	0.000457982	0.0256503	0.0231727	59/4629/4323/5054/7078	5		DOID:0111604	Freeman-Sheldon syndrome	2/28	10/7865	0.2	56.1786	10.4357	0.000540418	0.00912705	0.0065735	4626/4622
C0162298	Joint stiffness	12/286	163/21671	0.0736196	5.57836	6.78518	1.83235e-06	0.00091414	0.000779018	1292/4882/5745/4907/1291/285590/259232/9719/4322/57167/3339/7169	12		C3495559	Juvenile arthritis	21/178	450/21671	0.0466667	5.68154	9.13277	1.50503e-10	1.23864e-07	8.83375e-08	3106/1844/3811/3135/3553/355/6891/3804/113/6401/3105/1118/3162/3383/3107/54757/6890/7852/5008/5698/3663	21		DOID:14018	alcoholic liver cirrhosis	4/144	21/7865	0.190476	10.4034	5.89242	0.000506167	0.0256503	0.0231727	4921/5054/4322/5328	4		DOID:0111605	distal arthrogryposis type 2A	2/28	10/7865	0.2	56.1786	10.4357	0.000540418	0.00912705	0.0065735	4626/4622
C0022548	Keloid	12/286	165/21671	0.0727273	5.51074	6.72617	2.08284e-06	0.000935197	0.000796962	284217/4921/5654/3084/633/649/5054/4322/1803/1490/6876/6387	12		C0019100	Severe Dengue	12/178	117/21671	0.102564	12.4869	11.3376	2.35463e-10	1.61488e-07	1.1517e-07	23601/3106/3811/3553/2048/6891/6401/3105/3383/3107/6890/7852	12		DOID:1934	dysostosis	6/144	56/7865	0.107143	5.85193	4.97597	0.000518755	0.0256503	0.0231727	132884/2121/8823/7291/4920/117581	6		DOID:11984	hypertrophic cardiomyopathy	4/28	116/7865	0.0344828	9.68596	5.63313	0.000699757	0.00934021	0.00672702	2318/4626/4622/4634
C0339573	Glaucoma, Primary Open Angle	18/286	383/21671	0.0469974	3.56112	5.84817	3.78588e-06	0.00152867	0.00130271	57194/781/84898/80781/4016/285590/5308/2619/4314/2192/5054/7057/7078/26508/7043/1490/3037/84627	18		C0027121	Myositis	16/178	254/21671	0.0629921	7.66911	9.72964	3.53824e-10	1.90647e-07	1.35966e-07	10866/3106/6275/7253/3135/3553/5777/355/5742/6737/3105/348/3107/7852/5698/3663	16		DOID:2256	osteochondrodysplasia	9/144	128/7865	0.0703125	3.84033	4.4244	0.000540524	0.0256503	0.0231727	4921/4882/5745/633/649/4322/6474/3339/23187	9		DOID:0111599	distal arthrogryposis type 2B	2/28	12/7865	0.166667	46.8155	9.49316	0.000789127	0.00934021	0.00672702	4626/4622
C0007766	Intracranial Aneurysm	16/286	311/21671	0.0514469	3.89828	5.95356	4.22902e-06	0.00152867	0.00130271	2246/9781/59/4629/4016/169611/4314/5054/7078/1803/22891/3339/5311/6387/7291/25802	16		C3714757	Juvenile rheumatoid arthritis	14/178	183/21671	0.0765027	9.31399	10.2785	3.70639e-10	1.90647e-07	1.35966e-07	3106/3135/3553/355/6401/5696/3105/3162/3107/6890/7852/5698/3663/6892	14		DOID:13359	Ehlers-Danlos syndrome	4/144	23/7865	0.173913	9.49879	5.57409	0.000727892	0.0316633	0.0286049	715/29940/716/84627	4		DOID:2106	myotonia congenita	2/28	12/7865	0.166667	46.8155	9.49316	0.000789127	0.00934021	0.00672702	4626/4622
C4721779	Ovarian cancer stage IV	7/286	51/21671	0.137255	10.4002	7.77233	4.56498e-06	0.00152867	0.00130271	4921/1902/4323/4907/5054/6387/5328	7		C0018522	Hallermann's Syndrome	6/178	13/21671	0.461538	56.191	18.1143	4.6167e-10	2.08109e-07	1.48419e-07	3106/2048/3105/3133/348/3383	6		DOID:0080425	developmental and epileptic encephalopathy 47	3/144	12/7865	0.25	13.6545	5.9908	0.00117144	0.047038	0.0424945	2246/2252/8823	3		DOID:11446	sciatic neuropathy	4/28	124/7865	0.0322581	9.06106	5.40792	0.000899052	0.00934021	0.00672702	9590/4622/83700/5125
C0003486	Aortic Aneurysm	15/286	278/21671	0.0539568	4.08846	5.99357	4.76644e-06	0.00152867	0.00130271	59/4629/4323/4016/54453/4314/5054/7057/7078/11173/7043/6876/11096/30008/9242	15		C1527336	Sjogren's Syndrome	21/178	481/21671	0.043659	5.31537	8.70995	5.05732e-10	2.08109e-07	1.48419e-07	3106/10750/23526/3553/355/2048/6891/6737/57379/6401/5696/3105/115650/3162/3383/6890/7852/6362/5698/3663/2358	21															DOID:0111596	distal arthrogryposis type 1	2/28	13/7865	0.153846	43.2143	9.10472	0.000930553	0.00934021	0.00672702	4626/4622
C0409338	Flexion contracture - elbow	8/286	73/21671	0.109589	8.30386	7.22878	5.33711e-06	0.00159758	0.00136143	4921/1292/2706/91179/1291/633/259232/7169	8		C0036220	Kaposi Sarcoma	21/178	488/21671	0.0430328	5.23912	8.61952	6.56299e-10	2.45516e-07	1.75097e-07	51237/3106/6036/5973/3811/3135/3553/5777/2048/57379/6401/3105/970/7293/3162/3383/3107/8837/7852/5008/3663	21		LumA-ceRM3													DOID:12528	lesion of sciatic nerve	4/28	127/7865	0.0314961	8.84702	5.32866	0.00098318	0.00934021	0.00672702	9590/4622/83700/5125
C0340643	Dissection of aorta	11/286	152/21671	0.0723684	5.48355	6.41491	5.82967e-06	0.00163595	0.00139413	59/4629/4323/4314/2192/7057/7078/5311/1490/6876/30008	11		C0014060	Encephalitis, St. Louis	16/178	272/21671	0.0588235	7.1616	9.30619	9.62119e-10	3.29927e-07	2.35297e-07	3106/3135/3553/355/2048/6891/6737/57379/144423/115650/970/348/7293/567/7852/3663	16		ID	Description	GeneRatio	BgRatio	RichFactor	FoldEnrichment	zScore	pvalue	p.adjust	qvalue	geneID	Count		DOID:9473	mononeuritis of lower limb	4/28	127/7865	0.0314961	8.84702	5.32866	0.00098318	0.00934021	0.00672702	9590/4622/83700/5125
C0158113	Contracture of joint of hand	7/286	55/21671	0.127273	9.6438	7.4226	7.64913e-06	0.00202027	0.00172165	4921/91179/9719/3339/1490/7169/4920	7		C0001175	Acquired Immunodeficiency Syndrome	15/178	243/21671	0.0617284	7.51526	9.29469	1.70054e-09	5.2881e-07	3.77137e-07	10866/3106/3135/3553/355/6891/57379/3105/348/567/3383/3107/7852/6362/5008	15		DOID:934	viral infectious disease	18/85	336/7865	0.0535714	4.95693	7.7482	1.26214e-08	7.37087e-06	5.12826e-06	340061/3106/2512/3811/3135/3553/5777/355/2048/6891/57379/6401/3105/348/567/3383/3107/3663	18		DOID:633	myositis	3/28	62/7865	0.0483871	13.5916	5.94938	0.00132804	0.0116036	0.00835718	4626/4622/9353
C0086437	Joint laxity	13/286	224/21671	0.0580357	4.39752	5.911	9.4723e-06	0.00223068	0.00190095	1292/8642/4882/1291/54453/633/715/10484/716/7043/7169/30008/84627	13		C0035235	Respiratory Syncytial Virus Infections	15/178	244/21671	0.0614754	7.48446	9.26998	1.79911e-09	5.2881e-07	3.77137e-07	6036/140691/3811/3553/355/2048/6401/116071/84166/7293/567/3383/3107/6890/8837	15		DOID:417	autoimmune disease	17/85	333/7865	0.0510511	4.72372	7.25748	6.94534e-08	2.02804e-05	1.411e-05	64805/340061/3106/122618/7253/3553/355/6891/348/3162/567/3383/2889/50619/6890/5698/3663	17		DOID:1802	mononeuritis	4/28	140/7865	0.0285714	8.02551	5.01324	0.00141275	0.0116036	0.00835718	9590/4622/83700/5125
C0026857	Musculoskeletal Diseases	6/286	38/21671	0.157895	11.9641	7.82285	9.70469e-06	0.00223068	0.00190095	5745/4907/633/9719/3339/11096	6		C0030809	Pemphigus Vulgaris	11/178	115/21671	0.0956522	11.6454	10.4164	2.85845e-09	7.84168e-07	5.59253e-07	10866/3106/3811/3135/2048/6891/3105/3107/6890/8837/6362	11		DOID:0081267	graft-versus-host disease	7/85	39/7865	0.179487	16.6078	10.2128	1.55907e-07	3.03499e-05	2.11158e-05	3134/3106/3135/355/3105/3133/3107	7		DOID:1188	mononeuropathy	4/28	141/7865	0.0283688	7.96859	4.99067	0.00145045	0.0116036	0.00835718	9590/4622/83700/5125
C0019294	Hernia, Inguinal	13/286	225/21671	0.0577778	4.37798	5.89024	9.93621e-06	0.00223068	0.00190095	59/4629/4907/285590/259232/715/29940/3339/716/7043/9037/30008/4920	13		C0042900	Vitiligo	18/178	395/21671	0.0455696	5.54797	8.30161	4.84432e-09	1.2459e-06	8.88551e-07	3134/3106/5699/3135/3553/355/5696/3105/3133/348/3162/3383/3107/10062/6890/7852/5698/5336	18		DOID:633	myositis	8/85	62/7865	0.129032	11.9393	9.03847	2.80353e-07	4.09315e-05	2.84779e-05	3134/3106/3135/355/4624/3105/3133/3107	8		DOID:3429	inclusion body myositis	2/28	19/7865	0.105263	29.5677	7.45166	0.00201329	0.015301	0.0110201	4626/4622
C1842229	Broad metacarpals	4/286	12/21671	0.333333	25.2576	9.72023	1.35273e-05	0.00289227	0.00246475	4921/4882/4323/633	4		C2607914	Allergic rhinitis (disorder)	19/178	446/21671	0.0426009	5.18654	8.12998	5.31614e-09	1.28682e-06	9.17734e-07	64805/101/3106/6036/3135/3553/355/2048/6891/1118/231/7293/3383/7941/6890/338339/7852/5008/5336	19		DOID:612	primary immunodeficiency disease	13/85	227/7865	0.0572687	5.29904	6.86967	8.02169e-07	9.36933e-05	6.51868e-05	23149/355/6891/57379/115650/970/7293/567/50619/6890/7852/5336/6892	13		DOID:9884	muscular dystrophy	4/28	158/7865	0.0253165	7.11121	4.63809	0.00220408	0.0159533	0.0114899	2318/4626/3908/4622
C1658953	tumor vasculature	12/286	200/21671	0.06	4.54636	5.8268	1.49828e-05	0.00291188	0.00248146	57124/10371/80781/3491/56648/25960/5054/7057/5069/800/6387/5328	12		C0275518	Acute infectious disease	13/178	198/21671	0.0656566	7.9935	8.99647	1.02947e-08	2.35347e-06	1.67845e-06	340061/57817/3106/7114/3553/355/6891/6737/3162/567/3383/6890/2358	13		DOID:2841	asthma	14/85	273/7865	0.0512821	4.7451	6.58276	1.09893e-06	0.000106962	7.44184e-05	64805/101/10911/3106/3135/3553/355/6891/3133/3162/3383/7941/3107/6890	14		DOID:0050646	distal arthrogryposis	2/28	21/7865	0.0952381	26.7517	7.06273	0.00246161	0.0170075	0.0122491	4626/4622
C0079218	Fibromatosis, Aggressive	8/286	84/21671	0.0952381	7.21645	6.60152	1.52724e-05	0.00291188	0.00248146	80781/4286/5308/5054/1490/7291/4920/9242	8		C0023351	Tuberculoid leprosy	7/178	35/21671	0.2	24.3494	12.5809	1.24108e-08	2.68792e-06	1.91697e-06	3384/3811/6891/3804/3162/3383/6890	7		DOID:1176	bronchial disease	14/85	277/7865	0.0505415	4.67658	6.5112	1.30783e-06	0.000109111	7.59132e-05	64805/101/10911/3106/3135/3553/355/6891/3133/3162/3383/7941/3107/6890	14		DOID:0080000	muscular disease	6/28	424/7865	0.0141509	3.9749	3.76414	0.00323718	0.0213935	0.0154081	2318/4626/3908/4622/9353/6586
C1836653	Ascending aortic dissection	5/286	25/21671	0.2	15.1545	8.18908	1.65414e-05	0.00291188	0.00248146	59/4629/5054/7043/30008	5		C0278764	Adult Burkitt Lymphoma	19/178	475/21671	0.04	4.86989	7.76085	1.46817e-08	3.02077e-06	2.15435e-06	29802/1844/3553/5777/355/2048/6891/57379/5696/3105/115650/83881/10170/567/3383/6890/338339/7852/5336	19		DOID:526	human immunodeficiency virus infectious disease	8/85	84/7865	0.0952381	8.81232	7.52391	2.98194e-06	0.000217682	0.000151451	340061/3106/3811/355/2048/57379/3105/3107	8		DOID:397	restrictive cardiomyopathy	2/28	26/7865	0.0769231	21.6071	6.29071	0.00376798	0.0238639	0.0171873	4626/4622
C0026267	Mitral Valve Prolapse Syndrome	9/286	111/21671	0.0810811	6.14373	6.28309	1.67053e-05	0.00291188	0.00248146	148979/8642/4323/285590/4314/29940/5328/7169/84627	9		C0278879	Childhood Burkitt Lymphoma	19/178	477/21671	0.0398323	4.84947	7.7365	1.57027e-08	3.07699e-06	2.19445e-06	29802/1844/3553/5777/355/2048/6891/57379/5696/3105/115650/83881/10170/567/3383/6890/338339/7852/5336	19		DOID:866	vein disease	5/85	23/7865	0.217391	20.1151	9.59551	3.78092e-06	0.000224615	0.000156275	3106/3553/355/3162/3383	5		DOID:12930	dilated cardiomyopathy	4/28	223/7865	0.0179372	5.03844	3.65669	0.00754596	0.0446656	0.0321691	2318/4626/4622/4053
C4087504	Peritoneal dissemination	11/286	170/21671	0.0647059	4.90294	5.90806	1.68617e-05	0.00291188	0.00248146	4921/80781/4323/5654/3491/5054/1803/10979/1490/5328/7291	11		C0042164	Uveitis	14/178	247/21671	0.0566802	6.90065	8.48768	1.79223e-08	3.22091e-06	2.29709e-06	51237/3106/140691/3811/3553/355/3105/231/3162/3383/3107/7852/5698/3663	14		DOID:6713	cerebrovascular disease	15/85	348/7865	0.0431034	3.98834	5.95989	3.84614e-06	0.000224615	0.000156275	64805/57817/10911/3106/3553/2048/6401/3105/348/3162/567/3383/7941/10062/1071	15		DOID:10481	diaphragm disease	2/28	38/7865	0.0526316	14.7838	5.09085	0.00793858	0.0446656	0.0321691	9353/6586
C0235833	Congenital diaphragmatic hernia	13/286	239/21671	0.0543933	4.12153	5.61168	1.88821e-05	0.00314002	0.00267588	7025/59/2706/3084/2252/11117/3736/10085/8516/8817/1490/30008/7291	13		C0524910	Hepatitis C, Chronic	18/178	430/21671	0.0418605	5.09639	7.80799	1.80027e-08	3.22091e-06	2.29709e-06	10866/57817/3106/7114/3811/3553/355/6891/3804/5696/3105/3133/348/3162/3107/6890/7852/6362	18		DOID:0060704	lymphoproliferative syndrome	4/85	13/7865	0.307692	28.4706	10.3607	8.4355e-06	0.000447848	0.000311589	355/6891/970/567	4		DOID:3827	congenital diaphragmatic hernia	2/28	38/7865	0.0526316	14.7838	5.09085	0.00793858	0.0446656	0.0321691	9353/6586
C0026850	Muscular Dystrophy	14/286	280/21671	0.05	3.78864	5.43142	2.32046e-05	0.00372103	0.00317101	284217/1292/2706/55679/1291/5308/284119/633/5054/10468/1490/30008/8082/9242	14		C0149678	Epstein-Barr Virus Infections	17/178	384/21671	0.0442708	5.38985	7.89858	2.02597e-08	3.4737e-06	2.47738e-06	216/3106/3811/3553/5777/355/57379/6401/3105/970/3133/3383/3107/6890/7852/5698/3663	17		DOID:0050161	lower respiratory tract disease	17/85	482/7865	0.0352697	3.26349	5.36076	1.19534e-05	0.000581733	0.000404739	64805/101/10911/3106/3135/3553/355/6891/3133/3162/3383/7941/3107/6890/8837/5698/3663	17		DOID:0060036	intrinsic cardiomyopathy	5/28	362/7865	0.0138122	3.87974	3.35286	0.00822787	0.0446656	0.0321691	2318/4626/4622/4053/4634
C0085110	Severe Combined Immunodeficiency	14/286	284/21671	0.0492958	3.73528	5.36591	2.71338e-05	0.00420106	0.00358008	5075/80781/4837/4323/4907/3491/4322/7070/1803/5069/6387/9260/5328/4311	14		C4703473	Atherosclerotic lesion	14/178	253/21671	0.055336	6.737	8.35308	2.42518e-08	3.99184e-06	2.8469e-06	101/57817/3553/6368/6401/1118/348/5360/3162/3383/7941/5008/1071/55509	14		DOID:104	bacterial infectious disease	10/85	175/7865	0.0571429	5.28739	5.99502	1.70187e-05	0.000764534	0.000531921	3106/3811/3553/6891/6401/3105/3162/3383/6890/54209	10		DOID:423	myopathy	5/28	372/7865	0.0134409	3.77544	3.27794	0.009206	0.0482521	0.0347522	2318/4626/3908/4622/9353
C0877015	Pelvic Organ Prolapse	9/286	119/21671	0.0756303	5.73071	5.98431	2.91739e-05	0.00436636	0.00372095	3915/80781/6591/4016/633/4314/649/7057/800	9		C0948089	Acute Coronary Syndrome	18/178	440/21671	0.0409091	4.98057	7.67674	2.55792e-08	4.04839e-06	2.88723e-06	64805/57817/3106/3811/3553/355/5742/6401/3105/970/348/7293/3162/567/3383/7941/3663/1071	18		DOID:7693	abdominal aortic aneurysm	6/85	54/7865	0.111111	10.281	7.1529	2.2741e-05	0.000948623	0.000660001	64805/3553/348/3162/7941/10062	6
C1969372	Tubulointerstitial fibrosis	15/286	328/21671	0.0457317	3.46522	5.20262	3.35952e-05	0.00476554	0.00406113	203447/9315/4921/7837/80781/633/5054/7057/143903/10468/6320/10979/1490/6387/9242	15		C1847835	VITILIGO-ASSOCIATED MULTIPLE AUTOIMMUNE DISEASE SUSCEPTIBILITY 1 (finding)	15/178	302/21671	0.0496689	6.04705	8.03784	3.18136e-08	4.84863e-06	3.45795e-06	3134/3106/5699/3135/3553/355/5696/3105/3133/3162/3383/3107/10062/6890/5698	15		DOID:0060180	colitis	8/85	117/7865	0.0683761	6.3268	6.06744	3.49514e-05	0.00136077	0.000946753	3106/3553/355/2048/5742/3162/3383/7852	8		LumA-ceRM4
C0409959	Osteoarthritis, Knee	16/286	368/21671	0.0434783	3.29447	5.13385	3.39638e-05	0.00476554	0.00406113	55384/4921/1902/140766/4314/5054/4322/3554/3339/10468/6320/8817/1490/5328/11096/7291	16		C0742343	Acute Chest Syndrome	17/178	405/21671	0.0419753	5.11038	7.59901	4.39776e-08	6.46314e-06	4.60939e-06	10866/64805/57817/3106/3553/355/5742/6401/3105/348/7293/3162/3383/7941/3107/3663/1071	17		DOID:5041	esophageal cancer	9/85	155/7865	0.0580645	5.37268	5.74682	4.07635e-05	0.00148787	0.00103518	3553/355/6891/5742/3162/7850/6890/7852/5698	9		ID	Description	GeneRatio	BgRatio	RichFactor	FoldEnrichment	zScore	pvalue	p.adjust	qvalue	geneID
C0162810	Cicatrix, Hypertrophic	11/286	185/21671	0.0594595	4.50541	5.53738	3.69087e-05	0.00502181	0.00427952	284217/9315/7041/80781/5054/4322/7043/1490/6387/5328/9242	11		C0022408	Arthropathy	12/178	187/21671	0.0641711	7.81265	8.51472	4.97676e-08	7.06185e-06	5.03637e-06	57817/3106/3553/2048/5742/3105/3162/567/6362/5008/5698/151306	12		DOID:0050589	inflammatory bowel disease	10/85	197/7865	0.0507614	4.69692	5.49255	4.72441e-05	0.00162297	0.00112918	3106/3553/355/2048/5742/3162/567/3383/7852/3663	10		DOID:654	overnutrition	11/27	492/7865	0.0223577	6.51272	7.41187	2.67783e-07	4.17742e-05	3.14293e-05	5346/3991/3240/4023/5950/948/3952/9370/364/1149/2878
C1837218	Cleft palate, isolated	14/286	295/21671	0.0474576	3.59599	5.1917	4.11092e-05	0.00542883	0.00462637	132884/9935/4907/2252/2619/4314/8823/23743/56034/7043/7145/9464/7291/4920	14		C0006267	Bronchiectasis	12/178	190/21671	0.0631579	7.6893	8.42793	5.93157e-08	7.87368e-06	5.61535e-06	3106/3553/51314/6891/6737/115650/567/3383/3107/6890/7852/6892	12		DOID:0060005	autoimmune disease of endocrine system	6/85	62/7865	0.0967742	8.95446	6.5723	5.05226e-05	0.00163918	0.00114045	3106/7253/3553/355/3383/5698	6		DOID:9970	obesity	11/27	492/7865	0.0223577	6.51272	7.41187	2.67783e-07	4.17742e-05	3.14293e-05	5346/3991/3240/4023/5950/948/3952/9370/364/1149/2878
C2981150	Uranostaphyloschisis	11/286	190/21671	0.0578947	4.38684	5.42253	4.70848e-05	0.00564832	0.00481342	132884/9935/4907/2619/4314/8823/7043/7145/9464/7291/4920	11		C0023343	Leprosy	12/178	190/21671	0.0631579	7.6893	8.42793	5.93157e-08	7.87368e-06	5.61535e-06	79690/340061/57817/3106/3811/3553/3105/348/3107/283234/6890/55509	12		DOID:3526	cerebral infarction	10/85	207/7865	0.0483092	4.47002	5.28811	7.18199e-05	0.00220752	0.00153587	57817/3106/3553/2048/3105/348/3162/3383/7941/10062	10		DOID:2349	arteriosclerosis	7/27	153/7865	0.0457516	13.3273	9.03713	5.88717e-07	6.12265e-05	4.60645e-05	3991/3240/5950/3679/948/9370/2878
C0013405	Dyspnea, Paroxysmal	4/286	16/21671	0.25	18.9432	8.30306	4.77052e-05	0.00564832	0.00481342	59/4629/3736/7043	4		C0026691	Mucocutaneous Lymph Node Syndrome	16/178	370/21671	0.0432432	5.26474	7.52982	7.44191e-08	9.56983e-06	6.82501e-06	10866/64805/57817/10911/3106/3135/3553/2048/6401/3105/3133/7293/3162/3383/7941/3107	16		DOID:9074	systemic lupus erythematosus	8/85	136/7865	0.0588235	5.44291	5.46281	0.000102161	0.00279984	0.00194798	64805/122618/3553/355/6891/50619/6890/3663	8		DOID:9352	type 2 diabetes mellitus	10/27	450/7865	0.0222222	6.47325	7.01774	1.18924e-06	9.27606e-05	6.97895e-05	3991/5105/3240/4023/5950/948/3952/9370/364/2878
C0345050	Congenital aneurysm of ascending aorta	4/286	16/21671	0.25	18.9432	8.30306	4.77052e-05	0.00564832	0.00481342	59/4629/4314/30008	4		C0024535	Malaria, Falciparum	11/178	158/21671	0.0696203	8.47607	8.58306	7.96338e-08	9.9301e-06	7.08195e-06	1769/57817/3106/3553/355/6401/3105/1118/3162/3383/3107	11		DOID:8857	lupus erythematosus	8/85	137/7865	0.0583942	5.40318	5.43418	0.000107552	0.00279984	0.00194798	64805/122618/3553/355/6891/50619/6890/3663	8		DOID:784	chronic kidney disease	7/27	191/7865	0.0366492	10.6758	7.94498	2.6255e-06	0.000163831	0.00012326	3240/4023/5950/3952/9370/729/80704
C0015300	Exophthalmos	12/286	225/21671	0.0533333	4.04121	5.30301	4.78032e-05	0.00564832	0.00481342	4921/80781/9935/5745/285590/633/2702/7043/1490/30008/7291/4920	12		C0920350	Autoimmune thyroiditis	11/178	161/21671	0.068323	8.31813	8.48172	9.65331e-08	1.16833e-05	8.33233e-06	2323/3106/7253/3553/355/2048/6891/113/3105/3383/3107	11		DOID:4362	cervical cancer	7/85	102/7865	0.0686275	6.35006	5.68441	0.000108178	0.00279984	0.00194798	3106/3553/5777/6891/5742/7293/6890	7		DOID:1074	kidney failure	8/27	289/7865	0.0276817	8.06357	7.18049	3.64112e-06	0.000166198	0.000125041	3240/4023/5950/3952/9370/729/2878/80704
C0079474	Hallopeau-Siemens Disease	6/286	51/21671	0.117647	8.91444	6.54388	5.48355e-05	0.00631312	0.00537995	4314/649/4322/7057/6876/9242	6		C0398650	Immune thrombocytopenic purpura	15/178	338/21671	0.0443787	5.40298	7.42455	1.38594e-07	1.62947e-05	1.16211e-05	3106/3811/3553/355/2048/5742/6737/3804/6401/3105/115650/970/7293/7852/6362	15		DOID:0080809	chronic asthma	4/85	24/7865	0.166667	15.4216	7.39561	0.00011449	0.00279984	0.00194798	3106/6891/3133/3107	4		DOID:0050440	familial partial lipodystrophy	3/27	10/7865	0.3	87.3889	16.043	4.26148e-06	0.000166198	0.000125041	5346/3991/63924
C1850135	Flared metaphysis	5/286	32/21671	0.15625	11.8395	7.09615	5.81324e-05	0.00636622	0.00542521	4921/4882/5745/285590/4322	5		C0750901	Alzheimer Disease, Early Onset	11/178	174/21671	0.0632184	7.69666	8.07114	2.12439e-07	2.42829e-05	1.73181e-05	274/3106/341/3553/355/3105/79890/348/3162/5336/54209	11		DOID:1398	parasitic infectious disease	7/85	103/7865	0.0679612	6.28841	5.64674	0.000115062	0.00279984	0.00194798	2995/3811/355/348/3162/3383/6362	7		DOID:0080299	partial lipodystrophy	3/27	10/7865	0.3	87.3889	16.043	4.26148e-06	0.000166198	0.000125041	5346/3991/63924
C0008479	Chondrosarcoma	16/286	385/21671	0.0415584	3.149	4.92013	5.81325e-05	0.00636622	0.00542521	4323/5745/8496/4314/5054/4322/7078/79148/10085/3339/92949/7043/10979/1490/6387/5328	16		C0751356	Idiopathic Inflammatory Myopathies	9/178	106/21671	0.0849057	10.337	8.76956	2.30323e-07	2.56156e-05	1.82685e-05	3106/6275/3553/5742/6737/3105/3107/7852/3663	9		DOID:8577	ulcerative colitis	6/85	73/7865	0.0821918	7.60516	5.926	0.000127261	0.00297281	0.00206832	3553/355/2048/5742/3383/7852	6		DOID:1936	atherosclerosis	5/27	80/7865	0.0625	18.206	9.07814	6.50176e-06	0.000191002	0.000143702	3240/5950/948/9370/2878
C4021395	Abnormality of the antihelix	4/286	17/21671	0.235294	17.8289	8.02728	6.17373e-05	0.00653843	0.00557196	5075/132884/2121/7291	4		C1141957	HIV disease progression	7/178	54/21671	0.12963	15.782	9.89748	2.86632e-07	3.10392e-05	2.21365e-05	10866/3106/3811/348/3383/3107/7852	7		DOID:12365	malaria	5/85	47/7865	0.106383	9.84355	6.35579	0.000140614	0.0031584	0.00219745	2995/3811/348/3162/3383	5		DOID:2348	arteriosclerotic cardiovascular disease	5/27	80/7865	0.0625	18.206	9.07814	6.50176e-06	0.000191002	0.000143702	3240/5950/948/9370/2878
C0003706	Arachnodactyly	8/286	102/21671	0.0784314	5.94296	5.78669	6.26175e-05	0.00653843	0.00557196	4882/59/4629/91179/29940/7043/30008/84627	8		C0011311	Dengue Fever	15/178	360/21671	0.0416667	5.0728	7.09142	3.11246e-07	3.28405e-05	2.34212e-05	23601/340061/3106/140691/3811/3553/6891/57379/3804/6401/3105/3133/8542/3107/6890	15		DOID:12361	Graves' disease	5/85	48/7865	0.104167	9.63848	6.2745	0.000155641	0.00336646	0.0023422	3106/7253/3553/355/3383	5		DOID:2018	hyperinsulinism	4/27	37/7865	0.108108	31.4915	10.9108	6.73404e-06	0.000191002	0.000143702	3240/5950/3952/9370
C0013720	Ehlers-Danlos Syndrome	7/286	77/21671	0.0909091	6.88843	5.98599	7.08011e-05	0.00722493	0.00615699	10371/4882/59/50509/633/715/29940	7		C0036202	Sarcoidosis	16/178	413/21671	0.0387409	4.7166	6.93985	3.29643e-07	3.3912e-05	2.41854e-05	3106/3135/3553/355/6891/6401/5696/3105/1118/567/3107/6890/7852/6362/5698/3663	16		DOID:2349	arteriosclerosis	8/85	153/7865	0.0522876	4.83814	5.011	0.000231361	0.00482553	0.00335735	3553/355/348/231/5360/567/7941/10062	8		DOID:0080208	metabolic dysfunction-associated steatotic liver disease	6/27	151/7865	0.0397351	11.5747	7.70047	9.61799e-06	0.000250068	0.000188141	5346/5105/3240/4023/3952/9370
C0034067	Pulmonary Emphysema	15/286	352/21671	0.0426136	3.22895	4.87581	7.47674e-05	0.00746013	0.00635742	9315/710/51454/4323/4016/3490/2252/3491/649/5054/7078/79148/7043/30008/9242	15		C0343641	Human papilloma virus infection	16/178	429/21671	0.037296	4.54069	6.74077	5.46515e-07	5.38025e-05	3.83709e-05	340061/3811/3135/3553/5777/355/6891/6401/5696/3105/3133/3107/6890/8837/7852/5698	16		DOID:7147	ankylosing spondylitis	4/85	29/7865	0.137931	12.7627	6.63284	0.000245587	0.00486315	0.00338352	3106/6891/6890/5698	4		DOID:811	lipodystrophy	3/27	18/7865	0.166667	48.5494	11.8531	2.84518e-05	0.000682844	0.000513746	5346/3991/63924
C0206734	Hemangioblastoma	7/286	79/21671	0.0886076	6.71404	5.88394	8.34517e-05	0.00814561	0.00694158	2246/4314/5054/6387/5328/7291/4311	7		C0027430	Nasal Polyps	17/178	484/21671	0.035124	4.27624	6.63369	5.49139e-07	5.38025e-05	3.83709e-05	3106/6036/3135/3553/51314/6891/5742/57379/6401/3105/1118/3383/7850/6890/6362/5008/6892	17		DOID:2352	hemochromatosis	3/85	12/7865	0.25	23.1324	8.0194	0.000249819	0.00486315	0.00338352	57817/3162/567	3		DOID:9452	steatotic liver disease	6/27	198/7865	0.030303	8.82716	6.54674	4.49151e-05	0.00100096	0.000753088	5346/5105/3240/4023/3952/9370
C0158731	Congenital pectus carinatum	9/286	138/21671	0.0652174	4.9417	5.37191	9.29894e-05	0.00888346	0.00757036	132884/2121/1291/633/259232/3339/7043/4920/4311	9		C0677607	Hashimoto Disease	14/178	335/21671	0.041791	5.08794	6.86217	7.55223e-07	6.99977e-05	4.9921e-05	57817/3106/7253/5973/3811/3135/3553/355/2048/3105/3383/3107/5698/5336	14		DOID:3454	brain infarction	10/85	249/7865	0.0401606	3.71604	4.55212	0.000327245	0.0060995	0.0042437	57817/3106/3553/2048/3105/348/3162/3383/7941/10062	10		DOID:1168	familial hyperlipidemia	4/27	65/7865	0.0615385	17.9259	8.04198	6.46465e-05	0.00134465	0.00101166	4023/5950/3952/9370
C0240340	Microdontia (disorder)	8/286	109/21671	0.0733945	5.5613	5.52097	0.0001002	0.00932143	0.0079436	132884/2121/5308/64388/715/10484/716/117581	8		C0013537	Eclampsia	12/178	241/21671	0.0497925	6.0621	7.19149	7.73292e-07	6.99977e-05	4.9921e-05	3106/3811/3135/3553/355/6891/5742/3105/3133/348/3107/6890	12		DOID:865	vasculitis	6/85	87/7865	0.0689655	6.38134	5.27542	0.000334692	0.0060995	0.0042437	3106/3553/355/3105/3162/3383	6		DOID:10591	pre-eclampsia	5/27	141/7865	0.035461	10.3297	6.56077	0.000101334	0.00197601	0.00148667	2167/3240/5950/3952/2878
C0029422	Osteochondrodysplasias	11/286	207/21671	0.0531401	4.02657	5.05986	0.000101726	0.00932143	0.0079436	579/10371/8642/4882/5745/285590/9719/3339/10484/10468/4920	11		C0266929	Chronic Periodontitis	13/178	287/21671	0.0452962	5.51468	7.00672	7.74311e-07	6.99977e-05	4.9921e-05	101/51237/57817/3106/3553/6401/84166/3105/348/3383/7850/7852/5008	13		DOID:2789	parasitic protozoa infectious disease	6/85	88/7865	0.0681818	6.30882	5.2345	0.000356109	0.0060995	0.0042437	2995/3811/348/3162/3383/6362	6		DOID:9455	lipid storage disease	6/27	261/7865	0.0229885	6.69647	5.49295	0.000207364	0.00380573	0.00286329	5346/5105/3240/4023/3952/9370
C0018798	Congenital Heart Defects	16/286	406/21671	0.0394089	2.98612	4.67189	0.000108005	0.00969885	0.00826523	7025/1292/8642/4837/59/1291/285590/5308/57167/2702/5311/5069/5350/9464/7291/8082	16		C0026896	Myasthenia Gravis	14/178	336/21671	0.0416667	5.0728	6.84711	7.82478e-07	6.99977e-05	4.9921e-05	51237/3106/3135/3553/355/6891/3105/115650/348/7293/3107/6890/7852/5008	14		DOID:3627	aortic aneurysm	6/85	89/7865	0.0674157	6.23794	5.1942	0.000378585	0.0060995	0.0042437	64805/3553/348/3162/7941/10062	6		DOID:11612	polycystic ovary syndrome	3/27	43/7865	0.0697674	20.323	7.45677	0.000406368	0.00684637	0.00515095	948/9370/2878
C1845050	PIGMENTARY DISORDER, RETICULATE, WITH SYSTEMIC MANIFESTATIONS	11/286	209/21671	0.0526316	3.98804	5.01975	0.000110778	0.00975283	0.00831123	284217/4323/3084/3491/5054/7057/7078/57125/3339/10468/1490	11		C0949691	Spondylarthropathies	8/178	92/21671	0.0869565	10.5867	8.38569	9.15411e-07	8.01472e-05	5.71594e-05	3106/3811/3553/355/3105/567/3107/5698	8		DOID:8893	psoriasis	6/85	89/7865	0.0674157	6.23794	5.1942	0.000378585	0.0060995	0.0042437	6891/348/3383/3107/6890/5698	6		DOID:3211	lysosomal storage disease	6/27	297/7865	0.020202	5.88477	5.03655	0.000416926	0.00684637	0.00515095	5346/5105/3240/4023/3952/9370
C0240635	Byzanthine arch palate	18/286	497/21671	0.0362173	2.74428	4.54938	0.000118019	0.0101905	0.00868422	5075/4921/1292/4620/8642/91179/1291/54453/285590/259232/29940/3339/10484/7043/9037/7169/30008/7291	18		C0018995	Hemochromatosis	8/178	93/21671	0.0860215	10.4729	8.33122	9.94611e-07	8.52672e-05	6.08109e-05	3134/57817/3106/2512/3105/348/3162/567	8		DOID:3407	carotid artery disease	5/85	58/7865	0.0862069	7.97667	5.57393	0.000382718	0.0060995	0.0042437	10911/567/7941/10062/1071	5		DOID:0050847	sleep apnea	3/27	49/7865	0.0612245	17.8345	6.93755	0.000598404	0.00915262	0.00688608	3240/3952/9370
C0240310	Hypoplasia of the maxilla	8/286	113/21671	0.0707965	5.36444	5.37925	0.000128984	0.0106526	0.00907802	8642/9935/91179/5308/633/10484/7291/117581	8		C0948201	Alloimmunisation	7/178	65/21671	0.107692	13.1112	8.89916	1.04436e-06	8.68295e-05	6.19251e-05	3135/3553/6891/6737/7293/3107/6890	7		DOID:4960	bone marrow cancer	8/85	165/7865	0.0484848	4.48627	4.73042	0.000386441	0.0060995	0.0042437	2323/3553/5777/355/348/567/3383/8837	8		DOID:11714	gestational diabetes	3/27	50/7865	0.06	17.4778	6.85994	0.000635146	0.00915262	0.00688608	5950/3952/9370
C0023269	leiomyosarcoma	11/286	213/21671	0.0516432	3.91315	4.941	0.000130958	0.0106526	0.00907802	6591/633/5054/3554/10085/800/10979/7145/5328/4920/25802	11		C0021053	Immune System Diseases	16/178	451/21671	0.0354767	4.31919	6.48244	1.05504e-06	8.68295e-05	6.19251e-05	5973/3811/3553/355/2048/6891/57379/84166/348/3162/3107/283234/6890/7852/3663/5336	16		DOID:0050338	primary bacterial infectious disease	7/85	126/7865	0.0555556	5.14052	4.89711	0.000401539	0.00617102	0.00429346	3106/3811/3553/6891/3105/6890/54209	7		DOID:5082	liver cirrhosis	5/27	212/7865	0.0235849	6.8702	5.08517	0.000675096	0.00915262	0.00688608	3240/5950/948/3952/9370
C2973725	Pulmonary arterial hypertension	16/286	413/21671	0.0387409	2.93551	4.59268	0.000131443	0.0106526	0.00907802	80781/59/2706/284119/2252/3491/10395/7057/3339/7220/1490/6876/5739/55243/7291/4311	16		C2747816	Complicated malaria	10/178	166/21671	0.060241	7.33417	7.4553	1.19446e-06	9.63766e-05	6.87339e-05	57817/3811/3553/3804/6401/3105/3162/3383/6890/5698	10		DOID:2531	hematologic cancer	13/85	412/7865	0.0315534	2.91962	4.18349	0.000434263	0.00650281	0.00452431	2323/526/3553/5777/355/57379/348/3162/567/3383/8837/7852/5698	13		DOID:3146	lipid metabolism disorder	4/27	121/7865	0.0330579	9.62963	5.6144	0.000711377	0.00915262	0.00688608	4023/5950/3952/9370
C0795690	Congenital omphalocele	7/286	85/21671	0.0823529	6.24011	5.59785	0.000132861	0.0106526	0.00907802	4629/2706/4323/3090/5308/25802/117581	7		C0017661	IGA Glomerulonephritis	16/178	456/21671	0.0350877	4.27183	6.42603	1.21826e-06	9.64068e-05	6.87554e-05	3106/3553/355/2048/57379/6401/84166/5696/3105/8542/348/3162/3383/7941/7850/3663	16		DOID:10952	nephritis	9/85	219/7865	0.0410959	3.80258	4.39647	0.00055993	0.00817497	0.00568771	3553/355/1285/6401/348/3383/7941/2889/6362	9		DOID:1414	ovarian dysfunction	3/27	52/7865	0.0576923	16.8056	6.71125	0.000712893	0.00915262	0.00688608	948/9370/2878
C0016059	Fibrosis	10/286	184/21671	0.0543478	4.11808	4.91209	0.000174445	0.0135044	0.0115083	80781/2252/5322/5054/7057/56034/7043/1490/6387/8082	10		C3541994	Drug Hypersensitivity Syndrome	6/178	43/21671	0.139535	16.988	9.55016	1.337e-06	0.000102416	7.3041e-05	3106/7253/3553/3105/231/2358	6		DOID:423	myopathy	12/85	372/7865	0.0322581	2.98482	4.09927	0.000604979	0.00837057	0.00582379	3134/246329/274/3106/3135/355/1286/1285/4624/3105/3133/3107	12		DOID:12554	hemolytic-uremic syndrome	2/27	12/7865	0.166667	48.5494	9.67428	0.000733383	0.00915262	0.00688608	3240/948
C0271183	Severe myopia	10/286	184/21671	0.0543478	4.11808	4.91209	0.000174445	0.0135044	0.0115083	284217/80781/54453/388336/4314/8630/7078/1833/1490/84627	10		C0392514	Hereditary hemochromatosis	12/178	254/21671	0.0472441	5.75184	6.9325	1.34398e-06	0.000102416	7.3041e-05	3134/57817/3106/2512/3553/6401/3105/348/231/567/3383/3107	12		DOID:13241	Behcet's disease	5/85	64/7865	0.078125	7.22886	5.22956	0.000605362	0.00837057	0.00582379	3106/3553/355/3162/3383	5		DOID:5844	myocardial infarction	6/27	350/7865	0.0171429	4.99365	4.48581	0.000994307	0.0119317	0.00897694	3240/4023/5950/948/9370/2878
C0410528	Skeletal dysplasia	10/286	186/21671	0.0537634	4.0738	4.86881	0.000190459	0.0135531	0.0115498	579/10371/8642/4882/5745/285590/3339/10484/10468/4920	10		C0010823	Cytomegalovirus Infections	16/178	462/21671	0.034632	4.21635	6.35939	1.44401e-06	0.000108038	7.70506e-05	1769/3106/3811/3135/3553/4245/3804/6401/3105/3133/348/7293/567/3383/3107/7852	16		DOID:799	varicose veins	3/85	16/7865	0.1875	17.3493	6.84215	0.000616326	0.00837057	0.00582379	3553/355/3162	3		DOID:3118	hepatobiliary disease	6/27	353/7865	0.0169972	4.95121	4.45801	0.00103961	0.0120133	0.00903836	3240/5950/948/3952/9370/10840
C1855285	Protruding ear	9/286	152/21671	0.0592105	4.48654	4.98843	0.000193858	0.0135531	0.0115498	5075/1292/83987/91179/1291/285590/259232/29940/7169	9		C0007273	Carotid Artery Diseases	7/178	69/21671	0.101449	12.3512	8.59427	1.5744e-06	0.00011569	8.25081e-05	6401/348/7293/5360/3162/3383/6362	7		DOID:520	aortic disease	6/85	98/7865	0.0612245	5.66507	4.8572	0.000634763	0.00842504	0.00586169	64805/3553/348/3162/7941/10062	6		DOID:783	end stage renal disease	4/27	144/7865	0.0277778	8.09156	5.04066	0.00136299	0.0151876	0.0114266	4023/3952/9370/729
C0158266	Intervertebral Disc Degeneration	14/286	342/21671	0.0409357	3.10181	4.53084	0.000196265	0.0135531	0.0115498	4323/5654/5745/633/2619/4314/4322/7078/11173/6474/1490/9260/11096/4325	14		C0041327	Tuberculosis, Pulmonary	14/178	358/21671	0.0391061	4.76106	6.53011	1.65426e-06	0.00011779	8.40054e-05	340061/57817/3106/3811/3553/6891/6401/5696/3105/3162/3383/3107/6890/7852	14		DOID:13141	uveitis	5/85	65/7865	0.0769231	7.11765	5.17649	0.000650296	0.0084394	0.00587168	3106/3553/3105/3383/6362	5		DOID:13129	severe pre-eclampsia	2/27	17/7865	0.117647	34.2702	8.05936	0.0014953	0.0160873	0.0121035	5950/2878
C0162872	Aortic Aneurysm, Thoracic	5/286	41/21671	0.121951	9.24058	6.10772	0.000196347	0.0135531	0.0115498	59/4629/633/5054/7057	5		C0375023	Respiratory syncytial virus (RSV) infection in conditions classified elsewhere and of unspecified site	16/178	467/21671	0.0342612	4.17121	6.30472	1.66022e-06	0.00011779	8.40054e-05	6036/140691/3553/355/2048/6401/116071/84166/5696/3105/3162/567/3383/3107/6890/5698	16		DOID:399	tuberculosis	6/85	100/7865	0.06	5.55176	4.78796	0.000706612	0.00897091	0.00624147	3106/3811/3553/6891/3105/6890	6		DOID:409	liver disease	5/27	265/7865	0.0188679	5.49616	4.36977	0.00183594	0.0190938	0.0143654	3240/5950/948/3952/9370
C0877165	Short phalanx of finger	5/286	41/21671	0.121951	9.24058	6.10772	0.000196347	0.0135531	0.0115498	4921/4882/5745/285590/633	5		C0524909	Hepatitis B, Chronic	15/178	415/21671	0.0361446	4.4005	6.36527	1.84802e-06	0.000128891	9.19227e-05	340061/57817/3106/9111/6275/3811/3135/3553/3804/6401/3105/348/3107/6890/151306	15		DOID:66	muscle tissue disease	12/85	382/7865	0.0314136	2.90668	3.99313	0.000765441	0.00934657	0.00650284	3134/246329/274/3106/3135/355/1286/1285/4624/3105/3133/3107	12		DOID:535	sleep disorder	3/27	75/7865	0.04	11.6519	5.43986	0.0020667	0.0208003	0.0156494	3240/3952/9370
C0849640	skin damage	6/286	64/21671	0.09375	7.10369	5.65514	0.00019781	0.0135531	0.0115498	55384/2246/7057/1803/2922/6387	6		C0375359	Chronic left-sided ulcerative colitis	4/178	12/21671	0.333333	40.5824	12.4814	2.06909e-06	0.000141905	0.000101204	3553/355/5742/3383	4		DOID:120	female reproductive organ cancer	11/85	329/7865	0.0334347	3.09369	4.05491	0.00077349	0.00934657	0.00650284	3106/199713/3553/5777/355/6891/5742/3105/7293/3383/6890	11		DOID:0060611	abdominal obesity-metabolic syndrome	2/27	21/7865	0.0952381	27.7425	7.20185	0.00228946	0.0223222	0.0167944	4023/3952
C0022408	Arthropathy	10/286	187/21671	0.0534759	4.05202	4.84739	0.000198918	0.0135531	0.0115498	5118/2246/4323/4314/4322/7057/3554/10468/1490/11096	10		C0024301	Lymphoma, Follicular	16/178	477/21671	0.033543	4.08376	6.19762	2.18226e-06	0.000147213	0.000104989	51237/216/526/3106/3811/5777/355/2048/6891/57379/3105/1118/970/567/338339/7852	16		DOID:10591	pre-eclampsia	7/85	141/7865	0.0496454	4.59366	4.50056	0.000789079	0.00934657	0.00650284	1769/10911/355/5742/3105/3383/10062	7		DOID:0050624	gastrointestinal system benign neoplasm	3/27	87/7865	0.0344828	10.0447	4.97876	0.00315649	0.0281069	0.0211466	3240/5950/2878
C0853879	Invasive carcinoma of breast	17/286	473/21671	0.0359408	2.72333	4.38238	0.000199222	0.0135531	0.0115498	1902/80781/4323/3491/5054/7057/56034/10468/57214/5069/10979/1490/6387/5328/7291/3037/84627	17		C2931418	Bare lymphocyte syndrome 2	5/178	27/21671	0.185185	22.5458	10.1945	2.46405e-06	0.000163541	0.000116634	6891/3105/567/3107/6890	5		DOID:5295	intestinal disease	10/85	279/7865	0.0358423	3.31647	4.11778	0.00080022	0.00934657	0.00650284	3106/3553/355/2048/5742/3162/567/3383/7852/3663	10		DOID:13378	Kawasaki disease	2/27	25/7865	0.08	23.3037	6.55526	0.00324311	0.0281069	0.0211466	3240/9370
C1849367	Nasal bridge wide	16/286	429/21671	0.037296	2.82602	4.41769	0.000202328	0.013559	0.0115548	5961/8642/6591/9935/4286/285590/5308/259232/3339/10484/92949/9037/7169/7291/4920/117581	16		C0040425	Tonsillitis	6/178	48/21671	0.125	15.2184	8.97438	2.60127e-06	0.000167254	0.000119282	3106/6036/3811/3553/57379/3107	6		DOID:783	end stage renal disease	7/85	144/7865	0.0486111	4.49796	4.42793	0.000893757	0.0102344	0.00712054	57817/3553/1286/1285/348/3383/7941	7		DOID:1602	lymphadenitis	2/27	25/7865	0.08	23.3037	6.55526	0.00324311	0.0281069	0.0211466	3240/9370
C1836193	Synostosis of carpal bones	4/286	23/21671	0.173913	13.1779	6.75747	0.000215804	0.0142494	0.0121431	132884/2121/57167/4920	4		C0265110	Cerebral Vasospasm	6/178	48/21671	0.125	15.2184	8.97438	2.60127e-06	0.000167254	0.000119282	10911/6275/3553/5742/348/3162	6		DOID:3480	uveal disease	5/85	71/7865	0.0704225	6.51616	4.88008	0.000974456	0.0109439	0.00761417	3106/3553/3105/3383/6362	5		DOID:9942	lymph node disease	2/27	25/7865	0.08	23.3037	6.55526	0.00324311	0.0281069	0.0211466	3240/9370
C0235480	Paroxysmal atrial fibrillation	11/286	226/21671	0.0486726	3.68805	4.69772	0.000219537	0.0142858	0.0121742	5308/3084/5919/2702/3339/9644/6387/5350/9464/5328/8082	11		C0015773	Felty Syndrome	4/178	13/21671	0.307692	37.4607	11.9668	2.96952e-06	0.000187993	0.000134073	355/6891/3105/3107	4		DOID:0050848	obstructive sleep apnea	4/85	42/7865	0.0952381	8.81232	5.30591	0.00104017	0.0113376	0.00788808	3553/3162/3383/7941	4		DOID:13207	proliferative diabetic retinopathy	2/27	26/7865	0.0769231	22.4074	6.41684	0.00350595	0.0295637	0.0222426	5950/9370
C1858085	Malar flattening	10/286	190/21671	0.0526316	3.98804	4.78403	0.000226215	0.0145101	0.0123653	4921/8642/83987/91179/5745/633/3339/10484/7291/4920	10		C0035078	Kidney Failure	14/178	378/21671	0.037037	4.50916	6.26356	3.11447e-06	0.000194183	0.000138487	51237/57817/10911/3106/5973/3553/1286/2048/1285/5742/8542/348/231/567	14		DOID:1074	kidney failure	10/85	289/7865	0.0346021	3.20171	3.98594	0.00104834	0.0113376	0.00788808	57817/3553/355/1286/1285/348/3162/567/3383/7941	10		DOID:3393	coronary artery disease	6/27	453/7865	0.013245	3.85823	3.67773	0.00370734	0.0304392	0.0229013	3240/4023/5950/948/9370/2878
C0155094	Corneal pannus	6/286	66/21671	0.0909091	6.88843	5.54054	0.000234502	0.0147162	0.0125409	80781/4323/3490/4314/7078/11096	6		C0497156	Lymphadenopathy	12/178	277/21671	0.0433213	5.27425	6.51545	3.30353e-06	0.000202896	0.000144701	3106/355/57379/64859/5696/115650/970/567/3383/338339/7852/5698	12		DOID:0080208	metabolic dysfunction-associated steatotic liver disease	7/85	151/7865	0.0463576	4.28944	4.26592	0.00118087	0.0124597	0.00866881	57817/3553/348/7941/10062/3663/151306	7		DOID:418	systemic scleroderma	3/27	94/7865	0.0319149	9.29669	4.74932	0.00392856	0.0314285	0.0236456	5950/9370/2878
C0017658	Glomerulonephritis	15/286	391/21671	0.0383632	2.90688	4.40032	0.000235984	0.0147162	0.0125409	7041/710/10398/80781/1264/4314/5054/7070/2702/56034/143903/8516/1490/6876/93986	15		C0677932	Progressive Neoplastic Disease	14/178	384/21671	0.0364583	4.4387	6.18719	3.73501e-06	0.000222747	0.000158859	10866/2323/3106/3135/3553/6401/3105/3133/348/567/3107/10062/6362/5008	14		DOID:3342	bone inflammation disease	9/85	244/7865	0.0368852	3.41297	4.00205	0.00121069	0.0124597	0.00866881	3106/3553/355/6891/567/7941/6890/5698/3663	9		DOID:1575	rheumatic disease	3/27	96/7865	0.03125	9.10301	4.68814	0.00416847	0.0317211	0.0238657	5950/9370/2878
C0152021	Congenital heart disease	12/286	267/21671	0.0449438	3.40552	4.57377	0.000239891	0.014755	0.012574	9315/2121/3490/3491/10395/8406/6876/6387/5739/9464/3037/4311	12		C3539781	Progressive cGVHD	14/178	384/21671	0.0364583	4.4387	6.18719	3.73501e-06	0.000222747	0.000158859	10866/2323/3106/3135/3553/6401/3105/3133/348/567/3107/10062/6362/5008	14		DOID:9360	intrinsic asthma	3/85	20/7865	0.15	13.8794	6.02776	0.0012161	0.0124597	0.00866881	3106/6891/3133	3		DOID:419	scleroderma	3/27	96/7865	0.03125	9.10301	4.68814	0.00416847	0.0317211	0.0238657	5950/9370/2878
C0042781	Visceral Myopathy	3/286	10/21671	0.3	22.7318	7.94904	0.000254838	0.0151589	0.0129182	79827/4629/25802	3		C0024534	Malaria, Cerebral	9/178	148/21671	0.0608108	7.40355	7.11362	3.82671e-06	0.000224956	0.000160434	1769/3106/3553/3804/6401/3162/3383/5698/55509	9		DOID:74	hematopoietic system disease	11/85	349/7865	0.0315186	2.9164	3.82778	0.00125405	0.012627	0.00878518	64805/101/2323/57817/3553/355/2048/348/3162/22821/7852	11
C0679309	physical symptom	3/286	10/21671	0.3	22.7318	7.94904	0.000254838	0.0151589	0.0129182	4907/340075/10846	3		C0043124	West Nile Fever	7/178	79/21671	0.0886076	10.7877	7.93122	3.94819e-06	0.000228828	0.000163196	3811/3553/3105/115650/3107/6890/3663	7		DOID:2921	glomerulonephritis	8/85	201/7865	0.039801	3.68276	4.02711	0.00141228	0.0139791	0.00972594	3553/355/1285/6401/348/7941/2889/6362	8		LumA-ceRM6
C0027626	Neoplasm Invasiveness	10/286	193/21671	0.0518135	3.92605	4.72195	0.000256588	0.0151589	0.0129182	10371/6591/4323/3084/4314/7078/8823/6387/5328/7291	10		C0011633	Dermatomyositis	11/178	235/21671	0.0468085	5.6988	6.59083	4.09679e-06	0.000234143	0.000166986	340061/3106/3553/5742/6737/3105/1118/3383/3107/7852/3663	11		DOID:1407	anterior uveitis	3/85	22/7865	0.136364	12.6176	5.70335	0.0016174	0.0157101	0.0109302	3106/3383/6362	3		ID	Description	GeneRatio	BgRatio	RichFactor	FoldEnrichment	zScore	pvalue	p.adjust	qvalue	geneID
C0751674	Lymphangioleiomyomatosis	7/286	96/21671	0.0729167	5.52509	5.13861	0.000283696	0.0165428	0.0140976	4921/80781/4323/5054/7078/56034/5328	7		C1333064	Classical Hodgkin's Lymphoma	12/178	285/21671	0.0421053	5.1262	6.38114	4.42303e-06	0.000249325	0.000177814	3811/3135/355/2048/57379/3105/567/3107/8837/5698/3663/55509	12		DOID:1936	atherosclerosis	5/85	80/7865	0.0625	5.78309	4.49434	0.00166785	0.0157101	0.0109302	355/348/5360/7941/10062	5		DOID:2841	asthma	42/244	273/7865	0.153846	4.95902	11.9125	1.5903e-18	1.09341e-15	6.90869e-16	4353/10333/6356/10803/64127/7097/3106/3566/50616/154/5265/3135/3553/355/6891/5243/100/2100/10800/10392/2205/90865/4914/246778/7096/3133/7124/3568/4792/3162/3383/3107/1232/1437/6890/3605/11213/26762/4318/864/6369/6439
C0376634	Craniofacial Abnormalities	11/286	234/21671	0.0470085	3.56197	4.55677	0.000295979	0.0167591	0.0142818	1902/8642/285590/5308/4322/57167/3339/5311/5069/93986/7291	11		C0002874	Aplastic Anemia	11/178	238/21671	0.0462185	5.62697	6.53183	4.62543e-06	0.000257212	0.000183438	57817/3106/3811/3553/355/3105/970/567/3383/22821/7852	11		DOID:2348	arteriosclerotic cardiovascular disease	5/85	80/7865	0.0625	5.78309	4.49434	0.00166785	0.0157101	0.0109302	355/348/5360/7941/10062	5		DOID:1176	bronchial disease	42/244	277/7865	0.151625	4.88741	11.7855	2.77516e-18	1.09341e-15	6.90869e-16	4353/10333/6356/10803/64127/7097/3106/3566/50616/154/5265/3135/3553/355/6891/5243/100/2100/10800/10392/2205/90865/4914/246778/7096/3133/7124/3568/4792/3162/3383/3107/1232/1437/6890/3605/11213/26762/4318/864/6369/6439
C0240912	Vertical Talus	6/286	69/21671	0.0869565	6.58893	5.3773	0.000299358	0.0167591	0.0142818	2121/83987/8630/259232/5054/7169	6		C0020557	Hypertriglyceridemia	13/178	340/21671	0.0382353	4.65504	6.18183	5.02514e-06	0.000275713	0.000196633	341/3553/2048/5696/348/231/5360/3383/7941/10062/5008/5698/1071	13		DOID:11394	adult respiratory distress syndrome	4/85	48/7865	0.0833333	7.71078	4.87433	0.00172152	0.0159582	0.0111029	3553/3162/3383/5698	4		DOID:0050161	lower respiratory tract disease	52/244	482/7865	0.107884	3.47748	10.0445	6.18808e-16	1.6254e-13	1.027e-13	4353/10333/6356/10803/64127/7097/3106/3566/3579/50616/6366/154/5265/3135/3553/355/6891/5243/100/2100/10800/10109/10392/2205/5320/90865/4914/246778/7096/3133/7124/3568/4792/3162/3383/3107/1232/1437/8685/6890/3605/11213/8837/26762/5698/3663/4318/864/6369/6439/2643/6403
C0410005	Nodular fasciitis	4/286	25/21671	0.16	12.1236	6.43555	0.000301955	0.0167591	0.0142818	4286/5308/2252/7291	4		C0282193	Iron Overload	11/178	241/21671	0.0456432	5.55693	6.47382	5.21278e-06	0.000282245	0.000201291	57817/3106/2512/2048/3105/1118/348/3162/567/3383/6362	11		DOID:0050847	sleep apnea	4/85	49/7865	0.0816327	7.55342	4.80967	0.00185927	0.0168363	0.0117138	3553/3162/3383/7941	4		DOID:104	bacterial infectious disease	29/244	175/7865	0.165714	5.34157	10.3923	7.03889e-14	1.38666e-11	8.76156e-12	10333/64127/7097/3106/3566/50616/154/3553/6891/5243/100/6401/90865/246778/7096/3105/7124/4792/3162/3383/50846/8685/6890/3605/11213/43/4318/6439/54209
C0039103	Synovitis	10/286	197/21671	0.0507614	3.84633	4.64109	0.000302335	0.0167591	0.0142818	4921/4620/4314/5054/4322/7057/1803/5069/1490/5328	10		C3469186	HEMOCHROMATOSIS, TYPE 1	7/178	83/21671	0.0843373	10.2678	7.69843	5.50126e-06	0.000293996	0.000209672	3134/57817/3106/2512/3105/348/567	7		DOID:0080000	muscular disease	12/85	424/7865	0.0283019	2.61876	3.58171	0.00188297	0.0168363	0.0117138	3134/246329/274/3106/3135/355/1286/1285/4624/3105/3133/3107	12		DOID:0050589	inflammatory bowel disease	30/244	197/7865	0.152284	4.90867	9.94104	2.5633e-13	4.03976e-11	2.5525e-11	3717/64127/22900/7097/3106/120892/3579/154/5265/3553/355/2048/5243/2100/5742/3588/90865/4914/7124/3162/567/3383/1232/2771/3605/7852/26762/3663/864/6403
C0021167	Incontinence	6/286	70/21671	0.0857143	6.49481	5.32503	0.000323843	0.0175188	0.0149292	91624/633/2702/6387/7291/117581	6		C0220597	Adult Hodgkin Lymphoma	14/178	399/21671	0.0350877	4.27183	6.00294	5.79349e-06	0.000305644	0.000217979	57817/3811/3135/355/57379/3105/970/7293/3383/8837/7852/5698/3663/55509	14		DOID:6000	congestive heart failure	9/85	261/7865	0.0344828	3.19067	3.76199	0.00193156	0.0168363	0.0117138	57817/10911/355/4624/348/3162/7941/8837/7852	9		DOID:0050338	primary bacterial infectious disease	24/244	126/7865	0.190476	6.13973	10.4062	4.93569e-13	6.4822e-11	4.09575e-11	10333/64127/7097/3106/3566/50616/3553/6891/5243/100/90865/246778/7096/3105/7124/4792/50846/8685/6890/3605/11213/43/4318/54209
C0542514	Blue sclera	6/286	70/21671	0.0857143	6.49481	5.32503	0.000323843	0.0175188	0.0149292	715/29940/3339/7043/84627/4920	6		C0013238	Dry Eye Syndromes	9/178	156/21671	0.0576923	7.02388	6.87161	5.8866e-06	0.000306625	0.000218679	51237/57817/7114/3553/6737/5360/3383/3107/5008	9		DOID:9455	lipid storage disease	9/85	261/7865	0.0344828	3.19067	3.76199	0.00193156	0.0168363	0.0117138	57817/5660/3553/348/7941/2760/10062/3663/151306	9		DOID:5295	intestinal disease	34/244	279/7865	0.121864	3.92811	8.91033	4.24031e-12	4.77337e-10	3.01604e-10	3363/3717/64127/22900/7097/3106/120892/3579/154/5265/3553/355/2048/5243/2100/5742/3588/90865/4914/7124/3162/567/3383/1232/2771/3605/7852/26762/3663/43/4318/864/2643/6403
C0810364	Cleft Lip with or without Cleft Palate	7/286	99/21671	0.0707071	5.35767	5.02556	0.000342659	0.0182665	0.0155665	2246/2121/23743/56034/7043/9464/4920	7		C0949690	Spondylarthritis	9/178	158/21671	0.056962	6.93497	6.81377	6.52959e-06	0.000335866	0.000239533	3106/3811/3553/355/3105/567/3107/7850/5698	9		DOID:0080600	COVID-19	5/85	83/7865	0.060241	5.57406	4.37862	0.00196413	0.0168684	0.0117361	3106/2512/3553/6401/3107	5		DOID:0060180	colitis	22/244	117/7865	0.188034	6.06102	9.8684	6.36973e-12	6.27418e-10	3.96432e-10	3717/64127/3106/3579/154/5265/3553/355/2048/5243/2100/5742/90865/4914/7124/3162/3383/1232/3605/7852/26762/6403
C0028259	Nodule	12/286	278/21671	0.0431655	3.27077	4.40673	0.00034621	0.0182665	0.0155665	10371/5654/4016/4286/633/4314/1805/115701/800/2922/10979/4311	12		C0024314	Lymphoproliferative Disorders	12/178	300/21671	0.04	4.86989	6.14239	7.44789e-06	0.000378371	0.000269847	3106/3811/3135/355/57379/3804/3105/115650/970/3383/338339/7852	12		DOID:13025	retinopathy of prematurity	3/85	24/7865	0.125	11.5662	5.4185	0.00209288	0.0177136	0.0123242	3106/3553/3383	3		DOID:934	viral infectious disease	37/244	336/7865	0.110119	3.54953	8.54619	9.57611e-12	8.38441e-10	5.29766e-10	9560/6356/340061/7097/3106/2512/5265/3135/3553/5777/355/2048/6891/5243/2688/5320/3588/6401/90865/246778/3105/7124/3568/4792/348/3455/567/3383/4615/3107/1380/1232/1437/3605/3663/6439/6403
C3888391	Nonnuclear polymorphic congenital cataract	6/286	71/21671	0.084507	6.40333	5.27377	0.000349871	0.0182665	0.0155665	7041/9902/59/6591/3491/6387	6		C0026948	Mycosis Fungoides	11/178	251/21671	0.0438247	5.33553	6.28725	7.66757e-06	0.000384781	0.000274418	7471/3106/3135/3553/355/2048/3105/7293/567/8837/7852	11		DOID:2986	IgA glomerulonephritis	4/85	51/7865	0.0784314	7.25721	4.68566	0.00215735	0.0179985	0.0125224	3553/355/6401/7941	4		DOID:399	tuberculosis	20/244	100/7865	0.2	6.44672	9.80788	1.8449e-11	1.45378e-09	9.18566e-10	10333/64127/7097/3106/3566/50616/3553/6891/5243/100/90865/246778/7096/3105/7124/4792/8685/6890/11213/4318
C0340629	Aortic aneurysm without mention of rupture NOS	7/286	100/21671	0.07	5.30409	4.98889	0.000364359	0.0188043	0.0160247	59/4314/5054/7057/11173/6876/9242	7		C1562585	Leprosy, Multibacillary	5/178	34/21671	0.147059	17.904	8.9768	8.10665e-06	0.000401914	0.000286637	3811/6401/3105/348/3383	5		DOID:2377	multiple sclerosis	6/85	128/7865	0.046875	4.33732	3.97885	0.00252921	0.0208037	0.0144741	3553/355/6891/7941/5698/3663	6		DOID:417	autoimmune disease	35/244	333/7865	0.105105	3.38792	7.96704	1.38493e-10	9.92115e-09	6.26864e-09	326/9560/64127/340061/7097/3106/3579/154/3553/4067/355/6891/5243/2688/2100/9020/2204/7124/4792/348/3162/567/3383/1380/1232/2889/50619/6890/3605/5698/3663/4321/43/4318/6403
C2960127	Heart failure with normal ejection fraction	5/286	47/21671	0.106383	8.06093	5.60403	0.000376806	0.0192257	0.0163839	415/80781/3490/3084/4311	5		C0009447	Common Variable Immunodeficiency	10/178	207/21671	0.0483092	5.88151	6.42206	8.59957e-06	0.000421277	0.000300446	3106/3811/355/57379/113/3105/115650/1118/970/3107	10		DOID:0070004	myeloid neoplasm	6/85	131/7865	0.0458015	4.23799	3.90616	0.0028406	0.021843	0.0151972	2323/3553/5777/348/567/3383	6		DOID:4483	rhinitis	18/244	93/7865	0.193548	6.23876	9.09315	3.46559e-10	2.27574e-08	1.43792e-08	10333/6356/64127/7097/3566/50616/3135/3553/5243/10800/10392/2205/4914/7124/1232/6890/3605/6369
C0017668	Focal glomerulosclerosis	12/286	281/21671	0.0427046	3.23585	4.36262	0.000381324	0.0192376	0.016394	59/4323/9935/5054/4619/3554/8828/5311/1490/6876/55243/5328	12		C0206138	CREST Syndrome	6/178	59/21671	0.101695	12.3811	7.96623	8.86338e-06	0.000429092	0.00030602	3106/355/6891/6890/6362/3663	6		DOID:12894	Sjogren's syndrome	4/85	55/7865	0.0727273	6.72941	4.45664	0.00284959	0.021843	0.0151972	355/348/3162/3383	4		DOID:2163	nasal cavity disease	18/244	94/7865	0.191489	6.17239	9.02667	4.16914e-10	2.47921e-08	1.56648e-08	10333/6356/64127/7097/3566/50616/3135/3553/5243/10800/10392/2205/4914/7124/1232/6890/3605/6369
C0423798	Increased tendency to bruise	8/286	133/21671	0.0601504	4.55776	4.75946	0.000393855	0.019649	0.0167446	59/4629/54453/715/716/7043/5328/84627	8		C0040561	Ocular Toxoplasmosis	5/178	35/21671	0.142857	17.3925	8.83244	9.39511e-06	0.000446192	0.000318215	3106/3811/3553/3804/3107	5		DOID:1883	hepatitis C	4/85	55/7865	0.0727273	6.72941	4.45664	0.00284959	0.021843	0.0151972	3811/3135/3553/3663	4		DOID:2825	nose disease	19/244	106/7865	0.179245	5.77772	8.86098	4.40468e-10	2.47921e-08	1.56648e-08	10333/6356/64127/7097/3566/50616/3135/3553/5243/10800/10392/2205/4914/7124/1232/6890/3605/4318/6369
C0409348	Flexion contracture of proximal interphalangeal joint	9/286	168/21671	0.0535714	4.05925	4.6034	0.00040696	0.0199953	0.0170397	1292/9935/1291/285590/259232/9719/7169/4920/117581	9		C0029118	Opportunistic Infections	7/178	90/21671	0.0777778	9.46923	7.3269	9.43345e-06	0.000446192	0.000318215	57817/3811/3135/355/57379/3105/348	7		DOID:5199	ureteral obstruction	4/85	55/7865	0.0727273	6.72941	4.45664	0.00284959	0.021843	0.0151972	3553/567/3383/3663	4		DOID:850	lung disease	36/244	367/7865	0.0980926	3.16188	7.58931	5.16037e-10	2.71091e-08	1.71288e-08	4353/10333/6356/64127/7097/3566/3579/6366/154/5265/3553/355/100/10800/10109/5320/90865/4914/246778/7124/3568/4792/3162/3383/1232/1437/8685/6890/3605/8837/5698/3663/4318/6439/2643/6403
C1446712	Overlapping fingers	4/286	27/21671	0.148148	11.2256	6.14836	0.000410316	0.0199953	0.0170397	132884/2121/259232/7169	4		C0543698	Hypersensitive syndrome	4/178	17/21671	0.235294	28.6464	10.3773	9.63358e-06	0.000450479	0.000321273	3106/3105/348/3107	4		DOID:1205	allergic disease	3/85	27/7865	0.111111	10.281	5.04914	0.00295479	0.021843	0.0151972	231/3383/6890	3		DOID:974	upper respiratory tract disease	20/244	120/7865	0.166667	5.37227	8.6357	5.82819e-10	2.87038e-08	1.81364e-08	10333/6356/64127/7097/3566/50616/3135/3553/5243/10800/10392/2205/90865/4914/7124/1232/6890/3605/4318/6369
C0423113	Telecanthus	8/286	134/21671	0.0597015	4.52374	4.73175	0.000414157	0.0199953	0.0170397	6591/2706/9935/5745/4286/5308/29940/117581	8		C0030805	Bullous pemphigoid	8/178	127/21671	0.0629921	7.66911	6.85958	1.03308e-05	0.000477656	0.000340655	6036/3553/355/2048/6401/3383/3107/6362	8		DOID:1532	pleural disease	3/85	27/7865	0.111111	10.281	5.04914	0.00295479	0.021843	0.0151972	3553/3162/3383	3		DOID:526	human immunodeficiency virus infectious disease	15/244	84/7865	0.178571	5.756	7.84106	3.38898e-08	1.57089e-06	9.92562e-07	9560/6356/340061/3106/5265/355/2048/5243/5320/246778/3105/7124/3107/1380/6403
C0023267	Fibroid Tumor	15/286	413/21671	0.0363196	2.75204	4.15733	0.00042067	0.0200937	0.0171236	55384/2246/3490/3491/2192/5054/7057/1805/8839/10468/7043/800/10979/1490/4311	15		C0520679	Sleep Apnea, Obstructive	15/178	480/21671	0.03125	3.8046	5.65466	1.0693e-05	0.000488909	0.00034868	57817/3106/6036/3553/355/5742/6401/1118/348/3162/3383/7941/7850/5008/2358	15		DOID:1927	sphingolipidosis	3/85	27/7865	0.111111	10.281	5.04914	0.00295479	0.021843	0.0151972	5660/348/2760	3		DOID:8577	ulcerative colitis	14/244	73/7865	0.191781	6.18179	7.95843	3.81505e-08	1.67014e-06	1.05527e-06	3717/154/3553/355/2048/5243/2100/5742/90865/7124/3383/1232/7852/6403
C0040420	Tonometry	10/286	206/21671	0.0485437	3.67829	4.46666	0.000430614	0.0202421	0.01725	56265/1291/338773/10395/90139/9697/57569/9644/10979/7145	10		C0403396	Steroid-sensitive nephrotic syndrome	5/178	36/21671	0.138889	16.9093	8.69392	1.08382e-05	0.0004901	0.00034953	3106/3105/8542/7941/5336	5		DOID:627	severe combined immunodeficiency	3/85	27/7865	0.111111	10.281	5.04914	0.00295479	0.021843	0.0151972	6891/6890/6892	3		DOID:1398	parasitic infectious disease	16/244	103/7865	0.15534	5.00716	7.32452	9.09477e-08	3.77193e-06	2.38328e-06	2995/7097/414062/355/5243/100/90865/7124/4792/348/3162/2532/3383/1232/1437/3605
C0016202	Flatfoot	12/286	285/21671	0.0421053	3.19043	4.30472	0.000432793	0.0202421	0.01725	10371/1292/59/4629/1291/54453/57167/3339/10484/7043/7169/84627	12		C0153452	Malignant neoplasm of gallbladder	14/178	425/21671	0.0329412	4.0105	5.70407	1.18228e-05	0.000518711	0.000369934	216/5660/3106/2014/3553/355/2048/3105/348/567/3107/8837/6362/1071	14		DOID:9744	type 1 diabetes mellitus	7/85	180/7865	0.0388889	3.59837	3.68601	0.00321564	0.0234742	0.0163321	3553/355/6891/6401/348/3383/6890	7		DOID:3082	interstitial lung disease	20/244	163/7865	0.122699	3.95504	6.82129	1.28348e-07	5.05692e-06	3.1952e-06	4353/6356/64127/3566/6366/3553/10800/10109/7124/3162/3383/1232/1437/8685/6890/3605/8837/4318/6439/2643
C1850171	Neonatal short-limb short stature	3/286	12/21671	0.25	18.9432	7.19	0.000458138	0.0212066	0.0180719	132884/2121/5745	3		C0019372	Herpesviridae Infections	6/178	62/21671	0.0967742	11.782	7.73692	1.1849e-05	0.000518711	0.000369934	3106/3811/3135/3553/3105/3107	6		DOID:12030	panuveitis	3/85	28/7865	0.107143	9.91387	4.93869	0.00328375	0.0236754	0.0164721	3106/3383/6362	3		DOID:3083	chronic obstructive pulmonary disease	21/244	181/7865	0.116022	3.73981	6.67232	1.62552e-07	6.09957e-06	3.85399e-06	4353/6356/64127/3579/154/5265/3553/355/4914/246778/7124/3568/4792/3162/3383/1232/1437/3605/4318/6439/6403
C1568363	Tendinosis	4/286	28/21671	0.142857	10.8247	6.01584	0.000473765	0.0217062	0.0184977	633/4314/7078/11096	4		C0263666	Dermatomyositis, Childhood Type	6/178	62/21671	0.0967742	11.782	7.73692	1.1849e-05	0.000518711	0.000369934	3106/3553/6737/3105/6362/5336	6		DOID:848	arthritis	8/85	231/7865	0.034632	3.20448	3.55449	0.00337096	0.0238199	0.0165726	3106/3553/355/6891/567/7941/6890/3663	8		DOID:2320	obstructive lung disease	21/244	182/7865	0.115385	3.71926	6.64098	1.78728e-07	6.4017e-06	4.04489e-06	4353/6356/64127/3579/154/5265/3553/355/4914/246778/7124/3568/4792/3162/3383/1232/1437/3605/4318/6439/6403
C0013264	Muscular Dystrophy, Duchenne	14/286	375/21671	0.0373333	2.82885	4.13145	0.00049649	0.0225176	0.0191892	5308/633/5054/7057/7078/1803/3339/10468/1490/5350/5328/11096/30008/8082	14		C0087031	Juvenile-Onset Still Disease	9/178	171/21671	0.0526316	6.40775	6.4608	1.23645e-05	0.000535577	0.000381963	3106/1844/3553/355/113/54757/7852/5008/6892	9		DOID:9538	multiple myeloma	5/85	94/7865	0.0531915	4.92178	3.99806	0.00338536	0.0238199	0.0165726	2323/3553/348/567/3383	5		DOID:1024	leprosy	7/244	16/7865	0.4375	14.1022	9.38659	2.28723e-07	7.83626e-06	4.95131e-06	64127/7097/6891/246778/7096/7124/3605
C0241074	Hyperextensible skin	5/286	50/21671	0.1	7.57727	5.38457	0.000503977	0.0226286	0.0192837	54453/715/716/84627/117581	5		C0023348	Leprosy, Lepromatous	7/178	94/21671	0.0744681	9.06628	7.13235	1.25728e-05	0.000538929	0.000384353	3384/3811/3553/6401/3162/3383/6362	7		DOID:0111962	combined immunodeficiency	4/85	58/7865	0.0689655	6.38134	4.29936	0.00345909	0.0240489	0.016732	6891/7293/6890/6892	4		DOID:3213	demyelinating disease	18/244	140/7865	0.128571	4.14432	6.71664	2.75004e-07	8.86455e-06	5.60103e-06	64127/3566/3579/344/3553/355/6891/7124/1232/3605/9047/26762/5698/3663/4321/43/953/4318
C0278512	Metastatic osteosarcoma	5/286	51/21671	0.0980392	7.4287	5.31543	0.000552796	0.0244127	0.0208042	80781/3491/4314/800/7291	5		C0009326	Collagen Diseases	6/178	63/21671	0.0952381	11.595	7.66397	1.30077e-05	0.000551823	0.000393549	3106/3553/6737/6401/3107/5698	6		DOID:1575	rheumatic disease	5/85	96/7865	0.0520833	4.81924	3.93524	0.00370701	0.0251732	0.0175141	3553/6891/3105/3383/6890	5		DOID:552	pneumonia	14/244	85/7865	0.164706	5.30906	7.14683	2.81236e-07	8.86455e-06	5.60103e-06	4353/10333/6356/7097/154/3553/100/7124/4792/3162/3383/3663/4318/6439
C0279986	Childhood Leiomyosarcoma	8/286	140/21671	0.0571429	4.32987	4.57106	0.000554587	0.0244127	0.0208042	6591/633/5054/3554/800/7145/4920/25802	8		C0577631	Carotid Atherosclerosis	10/178	219/21671	0.0456621	5.55923	6.17122	1.40558e-05	0.000590199	0.000420919	1844/3553/6401/22846/348/231/3162/3383/7941/1071	10		DOID:419	scleroderma	5/85	96/7865	0.0520833	4.81924	3.93524	0.00370701	0.0251732	0.0175141	3553/6891/3105/3383/6890	5		DOID:2957	pulmonary tuberculosis	13/244	73/7865	0.178082	5.74023	7.28026	2.95077e-07	8.94312e-06	5.65067e-06	64127/7097/3566/3553/6891/5243/100/246778/7096/7124/4792/8685/6890
C0278607	Adult Leiomyosarcoma	8/286	141/21671	0.0567376	4.29916	4.54516	0.000581348	0.0253423	0.0215963	6591/633/5054/3554/800/7145/4920/25802	8		C0343723	Neonatal chlamydial conjunctivitis	5/178	38/21671	0.131579	16.0194	8.43288	1.42399e-05	0.000591892	0.000422126	3106/3553/3804/3105/3107	5		DOID:1107	esophageal carcinoma	6/85	139/7865	0.0431655	3.99408	3.7225	0.00381172	0.0255867	0.0178019	355/6891/5742/6890/7852/5698	6		DOID:865	vasculitis	14/244	87/7865	0.16092	5.18702	7.02653	3.78786e-07	1.10549e-05	6.98502e-06	4353/64127/7097/3106/3553/355/5243/3105/7124/3162/3383/1437/3605/4318
C3806510	Horizontal ribs	3/286	13/21671	0.230769	17.486	6.876	0.000589778	0.0254625	0.0216988	132884/2121/83987	3		C0031069	Familial Mediterranean Fever	8/178	133/21671	0.0601504	7.32314	6.65651	1.44841e-05	0.00059602	0.00042507	340061/3811/3135/3553/6737/57379/1118/3107	8		DOID:5200	urinary tract obstruction	4/85	60/7865	0.0666667	6.16863	4.20055	0.00391136	0.0259094	0.0180264	3553/567/3383/3663	4		DOID:2789	parasitic protozoa infectious disease	14/244	88/7865	0.159091	5.12807	6.96776	4.38154e-07	1.23309e-05	7.79123e-06	2995/7097/414062/5243/100/7124/4792/348/3162/2532/3383/1232/1437/3605
C0008924	Cleft upper lip	11/286	255/21671	0.0431373	3.26863	4.21427	0.000609819	0.026077	0.0222225	2246/132884/2121/9935/3084/2252/57167/23743/56034/7043/8817	11		C0268731	Renal glomerular disease	10/178	221/21671	0.0452489	5.50892	6.13121	1.52074e-05	0.000617128	0.000440124	3106/3553/355/1286/2048/1285/5742/8542/348/231	10		DOID:3213	demyelinating disease	6/85	140/7865	0.0428571	3.96555	3.7005	0.00394853	0.0259094	0.0180264	3553/355/6891/7941/5698/3663	6		DOID:3342	bone inflammation disease	23/244	244/7865	0.0942623	3.03841	5.78751	1.75395e-06	4.76591e-05	3.01132e-05	3717/7097/3106/120892/3566/5265/3553/355/6891/2688/2100/144811/90865/7124/567/1232/6890/3605/9047/5698/3663/4318/6403
C1096458	Vascular occlusion	4/286	30/21671	0.133333	10.103	5.76987	0.000621112	0.0261724	0.0223037	5054/7057/7043/5328	4		C0020097	HTLV-I Infections	8/178	134/21671	0.0597015	7.26849	6.6239	1.5297e-05	0.000617128	0.000440124	3135/3553/5777/355/970/7293/3383/3107	8		DOID:784	chronic kidney disease	7/85	191/7865	0.0366492	3.39113	3.49664	0.00445969	0.0289384	0.0201338	57817/3553/1286/1285/348/3383/7941	7		DOID:612	primary immunodeficiency disease	22/244	227/7865	0.0969163	3.12396	5.81006	1.87369e-06	4.80399e-05	3.03538e-05	3543/29760/3566/146206/1053/23149/355/6891/100/9020/115650/970/3455/7293/567/4615/1380/50619/6890/7852/30011/6892
C1397307	Cardiac fibrosis	12/286	297/21671	0.040404	3.06152	4.13696	0.000623707	0.0261724	0.0223037	4921/7837/4286/3491/64388/5054/1803/8839/1490/5350/5328/9242	12		C0948192	Primary infection NOS	6/178	65/21671	0.0923077	11.2382	7.52288	1.55999e-05	0.000623238	0.000444481	3106/7253/140691/3811/3553/7852	6		DOID:3211	lysosomal storage disease	9/85	297/7865	0.030303	2.80392	3.31243	0.00458712	0.0294382	0.0204815	57817/5660/3553/348/7941/2760/10062/3663/151306	9		DOID:2377	multiple sclerosis	16/244	128/7865	0.125	4.0292	6.1824	1.88989e-06	4.80399e-05	3.03538e-05	64127/3566/344/3553/355/6891/7124/1232/3605/9047/26762/5698/3663/4321/43/4318
C0349782	Ischemic cardiomyopathy	7/286	110/21671	0.0636364	4.8219	4.64728	0.000647865	0.0269344	0.0229531	7837/3491/4314/5054/6387/5350/4311	7		C0024140	Lupus Erythematosus, Subacute Cutaneous	5/178	39/21671	0.128205	15.6086	8.30967	1.62259e-05	0.000635901	0.000453512	3553/6737/3105/970/3663	5		DOID:8566	herpes simplex	2/85	10/7865	0.2	18.5059	5.78965	0.00491022	0.0308341	0.0214527	348/3663	2		DOID:0081267	graft-versus-host disease	9/244	39/7865	0.230769	7.43852	7.21206	2.15719e-06	5.31208e-05	3.35642e-05	3134/64127/3106/3135/355/3588/3105/3133/3107
C1821417	RESTING HEART RATE	6/286	80/21671	0.075	5.68295	4.85273	0.000665046	0.027395	0.0233456	353500/4629/55701/9645/7145/80206	6		C0040592	Trachoma	5/178	39/21671	0.128205	15.6086	8.30967	1.62259e-05	0.000635901	0.000453512	3106/3553/3804/3105/3107	5		DOID:988	mitral valve prolapse	2/85	10/7865	0.2	18.5059	5.78965	0.00491022	0.0308341	0.0214527	3106/7253	2		DOID:0060005	autoimmune disease of endocrine system	11/244	62/7865	0.177419	5.71887	6.67442	2.56548e-06	5.94588e-05	3.75688e-05	326/3106/154/3553/355/2688/2100/7124/3383/3605/5698
C3553764	Joint hyperflexibility	9/286	181/21671	0.0497238	3.7677	4.32413	0.000697399	0.0284666	0.0242588	4882/80781/83987/715/10484/716/9037/30008/84627	9		C0035455	Rhinitis	9/178	178/21671	0.0505618	6.15576	6.28557	1.7038e-05	0.000661428	0.000471717	3106/3135/3553/51314/3105/231/3162/3383/3107	9		DOID:10241	thalassemia	3/85	33/7865	0.0909091	8.41176	4.45947	0.00526078	0.032684	0.0227398	57817/3553/348	3		DOID:633	myositis	11/244	62/7865	0.177419	5.71887	6.67442	2.56548e-06	5.94588e-05	3.75688e-05	4625/3134/7097/3106/3135/355/3105/3133/7124/3107/4318
C0426790	Narrow thorax	7/286	112/21671	0.0625	4.7358	4.58391	0.000721315	0.0291775	0.0248647	132884/2121/8642/5745/3339/10484/7169	7		C0546126	Acute Confusional Senile Dementia	7/178	99/21671	0.0707071	8.60839	6.90488	1.76673e-05	0.000673156	0.000480081	274/341/3553/348/3162/5336/54209	7		DOID:9452	steatotic liver disease	7/85	198/7865	0.0353535	3.27124	3.38318	0.0054226	0.0333347	0.0231925	57817/3553/348/7941/10062/3663/151306	7		DOID:1485	cystic fibrosis	13/244	88/7865	0.147727	4.76178	6.3495	2.71395e-06	5.98208e-05	3.77975e-05	4353/6356/154/3135/3553/355/5243/7124/3162/1232/3605/4318/6439
C0584837	Choanal stenosis	3/286	14/21671	0.214286	16.237	6.59512	0.00074332	0.0292764	0.0249489	91179/5745/57167	3		C0750900	Alzheimer's Disease, Focal Onset	7/178	99/21671	0.0707071	8.60839	6.90488	1.76673e-05	0.000673156	0.000480081	274/341/3553/348/3162/5336/54209	7		DOID:0060058	lymphoma	5/85	106/7865	0.0471698	4.36459	3.64522	0.0056517	0.0340268	0.023674	526/355/3383/7852/5698	5		DOID:16	integumentary system disease	29/244	366/7865	0.079235	2.55403	5.44764	2.73293e-06	5.98208e-05	3.77975e-05	4353/2534/7512/7097/3106/6515/3566/1475/154/3553/6891/2100/1540/4914/3105/10161/7124/4792/348/3383/3107/1232/6890/3605/5873/26762/5698/4318/6403
C1843643	Nocturnal hypoventilation	3/286	14/21671	0.214286	16.237	6.59512	0.00074332	0.0292764	0.0249489	1292/1291/7169	3		C0038325	Stevens-Johnson Syndrome	6/178	67/21671	0.0895522	10.9027	7.38782	1.85937e-05	0.000701956	0.000500621	10866/3106/355/3105/231/3107	6		DOID:3021	acute kidney failure	5/85	106/7865	0.0471698	4.36459	3.64522	0.0056517	0.0340268	0.023674	3553/355/3162/567/3383	5		DOID:13241	Behcet's disease	11/244	64/7865	0.171875	5.54015	6.52523	3.55294e-06	7.56681e-05	4.78106e-05	64127/7097/3106/3553/355/5243/7124/3162/3383/3605/4318
C4020848	Aneurysmal disease	3/286	14/21671	0.214286	16.237	6.59512	0.00074332	0.0292764	0.0249489	633/4314/5054	3		C0494463	Alzheimer Disease, Late Onset	13/178	385/21671	0.0337662	4.11094	5.60488	1.88851e-05	0.000706476	0.000503845	274/341/3553/355/51314/27181/3105/348/3162/7941/5336/1071/54209	13		DOID:11162	respiratory failure	4/85	67/7865	0.0597015	5.52414	3.88708	0.00580716	0.0346059	0.024077	3553/3162/3383/5698	4		DOID:3042	allergic contact dermatitis	12/244	77/7865	0.155844	5.02342	6.34802	3.72332e-06	7.72099e-05	4.87848e-05	7097/3566/6891/4914/7124/4792/348/1232/3605/26762/4318/6403
C3811653	Experimental Organism Basal Cell Carcinoma	15/286	437/21671	0.0343249	2.60089	3.90972	0.000751895	0.0293566	0.0250173	80781/4837/4907/3490/3491/633/4314/5054/4322/10468/7043/1490/6387/7291/4311	15		C0151450	Secondary SjC6gren's syndrome	4/178	20/21671	0.2	24.3494	9.507	1.92369e-05	0.000713151	0.000508605	6737/6401/3105/3383	4		DOID:8947	diabetic retinopathy	6/85	152/7865	0.0394737	3.65248	3.45146	0.00588873	0.0347375	0.0241685	10911/3106/3553/348/231/3383	6		DOID:0050848	obstructive sleep apnea	9/244	42/7865	0.214286	6.9072	6.868	4.18413e-06	8.45408e-05	5.34168e-05	3553/5243/10800/4914/7124/3162/3383/4318/6439
C1858025	Spinal rigidity	5/286	55/21671	0.0909091	6.88843	5.05651	0.000784296	0.0303577	0.0258704	1292/1291/284119/3339/7169	5		C0852949	Arteriopathic disease	7/178	101/21671	0.0693069	8.43792	6.81833	2.01327e-05	0.000739699	0.000527538	6275/5973/6401/8542/348/7941/1071	7		DOID:0050830	peripheral artery disease	2/85	11/7865	0.181818	16.8235	5.48903	0.00595941	0.034803	0.024214	64805/567	2		DOID:2773	contact dermatitis	12/244	79/7865	0.151899	4.89624	6.22749	4.91058e-06	9.67385e-05	6.11238e-05	7097/3566/6891/4914/7124/4792/348/1232/3605/26762/4318/6403
C4021790	Abnormality of the skeletal system	8/286	148/21671	0.0540541	4.09582	4.37032	0.00079932	0.0306747	0.0261406	579/83987/5745/9719/8913/57167/3339/30008	8		C1609538	Latent Tuberculosis	9/178	183/21671	0.0491803	5.98757	6.16605	2.12312e-05	0.000773153	0.000551398	340061/57817/3811/3553/5696/3105/3133/7852/5698	9		DOID:170	endocrine gland cancer	9/85	317/7865	0.0283912	2.62702	3.09063	0.00697751	0.0403452	0.02807	101/2323/216/341/3553/348/3383/7852/5698	9		DOID:874	bacterial pneumonia	8/244	33/7865	0.242424	7.81421	7.01854	5.42348e-06	0.000102713	6.4899e-05	4353/10333/7097/3553/100/7124/4318/6439
C0340427	Familial dilated cardiomyopathy	6/286	83/21671	0.0722892	5.47755	4.7264	0.00080832	0.0307572	0.0262109	284217/91624/800/5350/9464/9260	6		C0017668	Focal glomerulosclerosis	11/178	281/21671	0.0391459	4.7659	5.7824	2.19987e-05	0.000794075	0.000566319	6275/3553/1286/2048/1285/3105/8542/348/3162/567/7852	11		DOID:2462	retinal vascular disease	6/85	161/7865	0.0372671	3.4483	3.28066	0.00774567	0.0442733	0.030803	10911/3106/3553/348/231/3383	6		DOID:2723	dermatitis	14/244	108/7865	0.12963	4.17843	5.95098	5.47456e-06	0.000102713	6.4899e-05	7097/3106/3566/154/6891/4914/7124/4792/348/1232/3605/26762/4318/6403
C1854114	Short nose	11/286	265/21671	0.0415094	3.14528	4.06348	0.00083662	0.0315666	0.0269006	415/4921/4882/3090/5745/2619/259232/9719/8913/29940/4920	11		C0037023	Sialadenitis	5/178	42/21671	0.119048	14.4937	7.96579	2.35006e-05	0.00083528	0.000595705	6737/57379/7852/5008/2358	5		DOID:5082	liver cirrhosis	7/85	212/7865	0.0330189	3.05522	3.17067	0.00780848	0.0442733	0.030803	57817/3553/355/22846/3162/3383/3663	7		DOID:11162	respiratory failure	11/244	67/7865	0.164179	5.29208	6.31284	5.65528e-06	0.000103636	6.54822e-05	154/3553/100/5320/90865/7124/3162/3383/5698/4318/6439
C1519666	Tumor-Associated Vasculature	6/286	84/21671	0.0714286	5.41234	4.68565	0.000861014	0.0322163	0.0274543	57124/80781/3491/7057/6387/5328	6		C1519680	Tumor Immunity	12/178	337/21671	0.0356083	4.33521	5.61556	2.37167e-05	0.00083528	0.000595705	340061/3135/3553/2048/970/7293/567/3383/8837/3663/2358/55509	12		DOID:341	peripheral vascular disease	4/85	74/7865	0.0540541	5.00159	3.61487	0.00823528	0.0462443	0.0321743	3553/355/3105/3383	4		DOID:12894	Sjogren's syndrome	10/244	55/7865	0.181818	5.86066	6.47234	5.87963e-06	0.000105299	6.65327e-05	326/355/9020/7124/4792/348/3162/3383/4318/6403
C0018566	Congenital Hand Deformities	3/286	15/21671	0.2	15.1545	6.34177	0.000920111	0.0333169	0.0283922	9719/8823/4920	3		C0007820	Cerebrovascular Disorders	10/178	233/21671	0.0429185	5.2252	5.90098	2.39719e-05	0.00083528	0.000595705	246329/3553/6401/8542/348/3162/3383/7941/1071/54209	10		DOID:61	mitral valve disease	2/85	13/7865	0.153846	14.2353	4.99179	0.0083339	0.0463523	0.0322495	3106/7253	2		DOID:0050598	extrapulmonary tuberculosis	6/244	18/7865	0.333333	10.7445	7.40553	1.1377e-05	0.000199224	0.000125879	3566/3553/100/90865/246778/4318
C0409345	Flexion contracture - wrist	3/286	15/21671	0.2	15.1545	6.34177	0.000920111	0.0333169	0.0283922	1291/9719/3339	3		C2347747	Adult Classical Hodgkin Lymphoma	10/178	233/21671	0.0429185	5.2252	5.90098	2.39719e-05	0.00083528	0.000595705	3135/355/2048/57379/3105/567/3107/5698/3663/55509	10		DOID:535	sleep disorder	4/85	75/7865	0.0533333	4.9349	3.5788	0.00862888	0.0475402	0.0330759	3553/3162/3383/7941	4		DOID:0070004	myeloid neoplasm	15/244	131/7865	0.114504	3.69087	5.55696	1.18822e-05	0.000203548	0.000128611	5371/2323/2322/3717/3566/3553/5777/4094/7124/4792/348/567/3383/10019/1437
C1388233	Aneurysm of descending thoracic aorta	3/286	15/21671	0.2	15.1545	6.34177	0.000920111	0.0333169	0.0283922	59/4629/7043	3		C0019621	Histiocytosis, Langerhans-Cell	7/178	104/21671	0.0673077	8.19452	6.69291	2.43581e-05	0.00083528	0.000595705	2323/3553/5777/2048/3105/3640/8837	7		DOID:9352	type 2 diabetes mellitus	11/85	450/7865	0.0244444	2.26183	2.88133	0.00876197	0.0478224	0.0332722	64805/10911/341/3553/348/231/3162/567/3383/7941/10062	11		DOID:4960	bone marrow cancer	17/244	165/7865	0.10303	3.32104	5.39125	1.2925e-05	0.000216699	0.000136921	5371/2323/2322/3717/3566/3553/5777/355/4094/7124/4792/348/567/3383/10019/1437/8837
C4022878	Descending aortic dissection	3/286	15/21671	0.2	15.1545	6.34177	0.000920111	0.0333169	0.0283922	59/4629/7043	3		C0149745	Oral Ulcer	7/178	104/21671	0.0673077	8.19452	6.69291	2.43581e-05	0.00083528	0.000595705	3106/3811/355/6891/3105/6890/5698	7															DOID:37	skin disease	26/244	336/7865	0.077381	2.49427	5.00887	1.42078e-05	0.000233244	0.000147374	4353/2534/7512/7097/3106/6515/3566/1475/154/3553/6891/1540/4914/3105/7124/4792/348/3383/3107/1232/6890/3605/26762/5698/4318/6403
C0085109	Corneal Neovascularization	7/286	117/21671	0.0598291	4.53341	4.43181	0.000933982	0.0335486	0.0285897	80781/2706/4323/2252/4314/4322/6387	7		C0220644	Childhood Hodgkin Lymphoma	13/178	399/21671	0.0325815	3.9667	5.44311	2.74025e-05	0.000931911	0.000664621	3811/3135/355/57379/3105/970/7293/3383/8837/7852/5698/3663/55509	13		LumA-ceRM5													DOID:0050847	sleep apnea	9/244	49/7865	0.183673	5.92046	6.1819	1.59469e-05	0.000256452	0.000162038	3553/5243/10800/4914/7124/3162/3383/4318/6439
C0241005	Creatine phosphokinase serum increased	10/286	228/21671	0.0438596	3.32337	4.0785	0.000943296	0.0336143	0.0286456	1292/91624/55679/1291/284119/29958/3736/3339/5350/7169	10		C4275242	Sudden sensorineural hearing loss	6/178	72/21671	0.0833333	10.1456	7.0738	2.81397e-05	0.000949137	0.000676906	3106/3553/6401/3105/348/3383	6		ID	Description	GeneRatio	BgRatio	RichFactor	FoldEnrichment	zScore	pvalue	p.adjust	qvalue	geneID	Count		DOID:2531	hematologic cancer	29/244	412/7865	0.0703883	2.26887	4.73381	2.70171e-05	0.00042579	0.000269034	5371/2323/2322/3717/526/3566/694/3553/5777/355/5243/2688/4094/933/7124/4792/348/3162/567/3383/4615/4066/10019/1437/8837/4005/7852/5698/6948
C1260873	Aortic valve disorder	5/286	58/21671	0.0862069	6.53213	4.87873	0.0010004	0.0352088	0.0300045	4907/11117/633/1803/11096	5		C4721555	Autoimmune hepatitis	9/178	190/21671	0.0473684	5.76697	6.00597	2.8554e-05	0.000951539	0.000678619	57817/3106/7253/3811/3553/355/6737/3105/3107	9		DOID:10907	microcephaly	20/179	59/7865	0.338983	14.8944	16.3475	6.17431e-19	2.66113e-16	2.14476e-16	1062/22995/284403/84823/51645/9918/55835/259266/4085/57082/23397/4001/9585/699/9928/203068/60386/163786/11113/6491	20		DOID:106	pleural tuberculosis	5/244	13/7865	0.384615	12.3975	7.35874	2.8954e-05	0.000447367	0.000282667	3553/100/90865/246778/4318
C0019553	Hip Contracture	4/286	34/21671	0.117647	8.91444	5.34095	0.00100846	0.0352088	0.0300045	5745/259232/3339/7169	4		C0014236	Endophthalmitis	4/178	22/21671	0.181818	22.1359	9.02616	2.86734e-05	0.000951539	0.000678619	140691/3553/355/6362	4		DOID:0070296	primary autosomal recessive microcephaly	15/179	31/7865	0.483871	21.2606	17.248	2.76442e-17	5.95732e-15	4.80136e-15	1062/22995/284403/84823/9918/55835/259266/57082/23397/4001/699/9928/163786/11113/6491	15		DOID:848	arthritis	20/244	231/7865	0.0865801	2.79079	4.94293	2.99901e-05	0.000454466	0.000287152	3106/120892/3566/5265/3553/355/6891/2688/2100/144811/90865/7124/567/1232/6890/3605/9047/3663/4318/6403
C0041956	Ureteral obstruction	13/286	359/21671	0.0362117	2.74386	3.85305	0.00103361	0.0352088	0.0300045	203447/4921/7837/4882/59/649/5054/7057/1803/10468/1490/7291/9242	13		C0025289	Meningitis	9/178	191/21671	0.0471204	5.73678	5.98375	2.9757e-05	0.000974401	0.000694924	2995/3106/3135/3553/355/3105/115650/3383/7852	9		DOID:0070297	primary microcephaly	15/179	33/7865	0.454545	19.9721	16.6661	9.16967e-17	1.31738e-14	1.06175e-14	1062/22995/284403/84823/9918/55835/259266/57082/23397/4001/699/9928/163786/11113/6491	15		DOID:75	lymphatic system disease	9/244	53/7865	0.169811	5.47363	5.84693	3.08684e-05	0.000458573	0.000289747	3553/1102/7124/3162/5641/5873/29969/4318/6403
C0149630	Bicuspid aortic valve	8/286	154/21671	0.0519481	3.93625	4.22883	0.00103454	0.0352088	0.0300045	59/4629/4323/7078/2702/7043/1490/11096	8		C0038002	Splenomegaly	12/178	345/21671	0.0347826	4.23468	5.5116	2.98359e-05	0.000974401	0.000694924	2995/57817/5660/526/3106/355/5696/115650/348/7293/567/5698	12		DOID:2490	congenital nervous system abnormality	23/179	133/7865	0.172932	7.5984	11.7116	1.66835e-14	1.79765e-12	1.44883e-12	1062/84790/22995/284403/84823/51645/9918/55835/259266/4085/57082/23397/4001/9585/55165/699/10376/9928/203068/60386/163786/11113/6491	23		DOID:3310	atopic dermatitis	10/244	66/7865	0.151515	4.88388	5.66929	3.1425e-05	0.000458573	0.000289747	7097/3566/4914/7124/4792/348/1232/3605/26762/6403
C0341858	Endometriosis of uterus	8/286	154/21671	0.0519481	3.93625	4.22883	0.00103454	0.0352088	0.0300045	1902/2246/3491/2846/5069/1490/6387/4311	8		C0867389	Chronic graft-versus-host disease	10/178	241/21671	0.0414938	5.05175	5.75614	3.19693e-05	0.00103585	0.000738751	3106/23526/3811/3553/6737/6401/3105/3133/3383/3107	10		DOID:13636	Fanconi anemia	12/179	31/7865	0.387097	17.0085	13.6282	1.29369e-12	1.11516e-10	8.98771e-11	675/83990/2189/2175/7516/55215/2187/2177/5888/2176/29089/7398	12		DOID:1575	rheumatic disease	12/244	96/7865	0.125	4.0292	5.34308	3.75391e-05	0.000528229	0.00033376	3717/7097/3553/6891/2100/10109/246778/3105/3383/6890/3605/4318
C0007286	Carpal Tunnel Syndrome	6/286	87/21671	0.0689655	5.22571	4.56721	0.00103509	0.0352088	0.0300045	4907/633/4314/5054/1490/11096	6		C0314719	Dryness of eye	8/178	149/21671	0.0536913	6.53676	6.17161	3.29201e-05	0.00105404	0.00075172	51237/57817/7114/3553/6737/3383/3107/5008	8		DOID:0060306	Meier-Gorlin syndrome	8/179	10/7865	0.8	35.1508	16.4902	2.66761e-12	1.91624e-10	1.54441e-10	990/8318/64785/81620/23594/4174/4998/51053	8		DOID:419	scleroderma	12/244	96/7865	0.125	4.0292	5.34308	3.75391e-05	0.000528229	0.00033376	3717/7097/3553/6891/2100/10109/246778/3105/3383/6890/3605/4318
C0747845	early pregnancy	11/286	273/21671	0.040293	3.05311	3.94789	0.00106488	0.0353824	0.0301524	7837/27254/2252/5919/4314/5054/4322/7057/10468/6387/5739	11		C0042384	Vasculitis	11/178	294/21671	0.037415	4.55517	5.58536	3.32989e-05	0.00105404	0.00075172	340061/57817/3106/27143/3553/355/115650/231/3383/3107/3663	11		DOID:1612	breast cancer	36/179	437/7865	0.0823799	3.61965	8.59897	7.96377e-12	4.29048e-10	3.45795e-10	8438/675/994/83990/55723/2175/11200/2237/1017/5426/23492/5347/6241/7083/10733/4288/995/9700/898/55215/2146/6790/3161/2177/5888/6502/983/2956/83540/2176/580/993/4436/5111/9656/891	36		DOID:9744	type 1 diabetes mellitus	17/244	180/7865	0.0944444	3.04429	4.9644	4.02769e-05	0.000556811	0.000351819	6356/7097/217/3553/355/6891/2688/6401/7124/348/2113/3383/10019/6890/11213/43/3990
C0206762	Limb Deformities, Congenital	5/286	59/21671	0.0847458	6.42142	4.82224	0.0010814	0.0353824	0.0301524	2121/2192/57167/9464/7291	5		C0856825	Acute GVH disease	11/178	294/21671	0.037415	4.55517	5.58536	3.32989e-05	0.00105404	0.00075172	3106/23526/3811/3135/3553/3105/3133/3162/3383/3107/6892	11		DOID:5093	thoracic cancer	36/179	437/7865	0.0823799	3.61965	8.59897	7.96377e-12	4.29048e-10	3.45795e-10	8438/675/994/83990/55723/2175/11200/2237/1017/5426/23492/5347/6241/7083/10733/4288/995/9700/898/55215/2146/6790/3161/2177/5888/6502/983/2956/83540/2176/580/993/4436/5111/9656/891	36		DOID:9588	encephalitis	5/244	14/7865	0.357143	11.512	7.04365	4.39041e-05	0.000587299	0.000371082	3553/5243/7124/4792/4318
C0221369	Acquired Camptodactyly	7/286	120/21671	0.0583333	4.42008	4.34461	0.00108351	0.0353824	0.0301524	8642/9935/259232/29940/7169/84627/4920	7		C0027697	Nephritis	11/178	296/21671	0.0371622	4.52439	5.55607	3.542e-05	0.00111262	0.000793498	57817/3106/3553/355/1286/1285/5742/3105/567/3383/151306	11		DOID:720	normocytic anemia	16/179	116/7865	0.137931	6.06049	8.37909	6.33784e-09	3.03512e-07	2.44619e-07	675/29127/1736/83990/2189/2175/81624/7516/55215/2187/2177/5888/9493/2176/29089/7398	16		DOID:4481	allergic rhinitis	7/244	32/7865	0.21875	7.0511	6.137	4.39729e-05	0.000587299	0.000371082	6356/64127/7097/3135/3553/5243/3605
C1840077	Anteverted nostril	14/286	407/21671	0.034398	2.60643	3.78351	0.00109694	0.0353824	0.0301524	5961/5075/2706/9935/3090/83987/5745/4286/2619/9719/3736/10484/4920/117581	14		C0035435	Rheumatism	9/178	197/21671	0.0456853	5.56205	5.85367	3.7916e-05	0.001182	0.000842981	3106/3135/3553/355/6737/3162/3107/5698/3663	9		DOID:1342	congenital hypoplastic anemia	12/179	61/7865	0.196721	8.64365	9.14545	8.81185e-09	3.79791e-07	3.06096e-07	675/83990/2189/2175/7516/55215/2187/2177/5888/2176/29089/7398	12		DOID:10952	nephritis	19/244	219/7865	0.086758	2.79652	4.82446	4.63202e-05	0.000608339	0.000384376	4353/6356/3579/414062/3553/355/1285/2204/6401/7096/7124/348/3383/2889/26762/7127/4321/4318/3990
C0024031	Low Back Pain	6/286	88/21671	0.0681818	5.16632	4.52894	0.00109874	0.0353824	0.0301524	10371/5654/5919/10468/11096/9242	6		C0003862	Arthralgia	10/178	248/21671	0.0403226	4.90916	5.63456	4.07426e-05	0.00125342	0.000893914	3106/2512/3553/355/5696/115650/5698/3663/5336/54209	10		DOID:12449	aplastic anemia	13/179	77/7865	0.168831	7.4182	8.63661	1.46717e-08	5.74864e-07	4.63317e-07	675/1736/83990/2189/2175/7516/55215/2187/2177/5888/2176/29089/7398	13		DOID:8778	Crohn's disease	10/244	70/7865	0.142857	4.6048	5.42042	5.29926e-05	0.00068456	0.000432537	3717/64127/7097/120892/5265/5243/2100/7124/3383/3605
C0242698	Ventricular Dysfunction, Left	6/286	88/21671	0.0681818	5.16632	4.52894	0.00109874	0.0353824	0.0301524	4882/59/4629/4314/7043/5350	6		C0242583	Bare Lymphocyte Syndrome	4/178	24/21671	0.166667	20.2912	8.60512	4.11207e-05	0.00125342	0.000893914	3105/567/3107/6890	4		DOID:11054	urinary bladder cancer	19/179	180/7865	0.105556	4.63796	7.53477	2.12722e-08	7.64026e-07	6.15774e-07	994/7153/2175/11200/23492/5347/6241/4288/898/2146/6790/7298/983/1786/2956/993/4436/332/1869	19		DOID:866	vein disease	6/244	23/7865	0.26087	8.40877	6.36659	5.42894e-05	0.000690001	0.000435975	3106/3553/355/3162/3383/4318
C0410606	Cervical Disc Degenerative Disorder	3/286	16/21671	0.1875	14.2074	6.11161	0.00112144	0.0353824	0.0301524	4314/4322/11096	3		C3826758	AIDS (Disease)	4/178	24/21671	0.166667	20.2912	8.60512	4.11207e-05	0.00125342	0.000893914	348/6890/7852/6362	4		DOID:0080015	physical disorder	23/179	271/7865	0.0848708	3.7291	6.97697	4.17852e-08	1.38534e-06	1.11653e-06	1062/84790/22995/284403/84823/51645/9918/55835/259266/4085/57082/23397/4001/9585/55165/699/10376/9928/203068/60386/163786/11113/6491	23		DOID:0080809	chronic asthma	6/244	24/7865	0.25	8.0584	6.19636	7.05219e-05	0.000864207	0.000546046	3106/6891/3133/4792/3107/1232
C1847800	Waardenburg Syndrome Type 1	3/286	16/21671	0.1875	14.2074	6.11161	0.00112144	0.0353824	0.0301524	6591/2706/4286	3		C0220756	Niemann-Pick Disease, Type C	9/178	201/21671	0.0447761	5.45137	5.76987	4.43472e-05	0.00134183	0.000956966	3553/5777/3105/1118/348/567/6362/5008/5698	9		DOID:3996	urinary system cancer	26/179	370/7865	0.0702703	3.08757	6.27704	2.35494e-07	7.24985e-06	5.84308e-06	675/994/7153/2175/11200/1017/5426/23492/5347/6241/6426/4288/898/2146/6790/7298/6502/983/1786/2956/993/4436/5111/332/1869/891	26		DOID:0050136	systemic mycosis	11/244	87/7865	0.126437	4.07551	5.16124	7.12861e-05	0.000864207	0.000546046	10333/64744/2512/3553/100/90865/7096/7124/1437/3087/51267
C1851712	Dural ectasia	3/286	16/21671	0.1875	14.2074	6.11161	0.00112144	0.0353824	0.0301524	59/4629/7043	3		C0020445	Hypercholesterolemia, Familial	9/178	203/21671	0.044335	5.39766	5.72881	4.78939e-05	0.00143856	0.00102596	3553/57379/6401/115650/8542/348/3383/7941/1071	9		DOID:1793	pancreatic cancer	21/179	276/7865	0.076087	3.34315	6.04729	1.0541e-06	2.99209e-05	2.4115e-05	8438/675/1111/2189/3181/2175/23492/7516/6241/4176/4288/2146/7514/2305/5888/1786/83540/2176/1789/1869/701	21		DOID:0060056	hypersensitivity reaction disease	11/244	87/7865	0.126437	4.07551	5.16124	7.12861e-05	0.000864207	0.000546046	64127/7097/3106/355/5243/100/4914/246778/7124/3162/6948
C4476554	Carotid artery dilatation	3/286	16/21671	0.1875	14.2074	6.11161	0.00112144	0.0353824	0.0301524	59/4629/7043	3		C0149516	Chronic sinusitis	9/178	205/21671	0.0439024	5.345	5.68829	5.16773e-05	0.00154096	0.00109898	6036/3553/51314/6891/5742/6401/3383/6890/6892	9		DOID:10283	prostate cancer	23/179	325/7865	0.0707692	3.1095	5.92697	1.11075e-06	2.99209e-05	2.4115e-05	675/994/7153/11200/1017/5426/5347/4288/995/898/8208/1870/2146/9134/6502/1786/83540/5933/993/4436/332/1869/891	23		DOID:2916	hypersensitivity reaction type IV disease	10/244	73/7865	0.136986	4.41556	5.24578	7.64938e-05	0.000903756	0.000571035	64127/7097/3106/355/5243/100/4914/7124/3162/6948
C0241703	High pitched voice	4/286	35/21671	0.114286	8.65974	5.24466	0.00112688	0.0353824	0.0301524	54453/9719/3339/9037	4		C0751967	Multiple Sclerosis, Relapsing-Remitting	9/178	206/21671	0.0436893	5.31905	5.66823	5.36616e-05	0.0015501	0.0011055	3811/3135/3553/355/6891/5696/3105/348/3383	9		DOID:3856	male reproductive organ cancer	23/179	330/7865	0.069697	3.06238	5.84094	1.44771e-06	3.60888e-05	2.90861e-05	675/994/7153/11200/1017/5426/5347/4288/995/898/8208/1870/2146/9134/6502/1786/83540/5933/993/4436/332/1869/891	23		DOID:9074	systemic lupus erythematosus	14/244	136/7865	0.102941	3.31817	4.87936	7.68422e-05	0.000903756	0.000571035	64127/3579/3553/4067/355/6891/2100/7124/1380/1232/50619/6890/3605/3663
C0003507	Aortic Valve Stenosis	10/286	234/21671	0.042735	3.23815	3.98083	0.00114785	0.0357906	0.0305003	1902/4323/4907/633/4314/5054/9719/4322/1490/4311	10		C4525297	Stage 0 Gallbladder Cancer AJCC v8	12/178	367/21671	0.0326975	3.98083	5.24121	5.4244e-05	0.0015501	0.0011055	216/5660/3106/2014/355/2048/3105/567/3107/8837/6362/1071	12		DOID:684	hepatocellular carcinoma	29/179	488/7865	0.0594262	2.6111	5.60778	1.50719e-06	3.60888e-05	2.90861e-05	7272/79980/1058/3181/1515/23492/259266/4176/6426/10733/55247/898/10797/2146/3925/7514/2305/7298/1033/8833/6502/983/1786/55143/83540/1789/84733/5111/8140	29		DOID:8857	lupus erythematosus	14/244	137/7865	0.10219	3.29395	4.84641	8.32594e-05	0.000964829	0.000609623	64127/3579/3553/4067/355/6891/2100/7124/1380/1232/50619/6890/3605/3663
C0020302	Hydrophthalmos	5/286	60/21671	0.0833333	6.31439	4.76705	0.00116716	0.0358943	0.0305886	7837/285590/5308/92949/7291	5		C4525300	Stage IIA Gallbladder Cancer AJCC v8	12/178	367/21671	0.0326975	3.98083	5.24121	5.4244e-05	0.0015501	0.0011055	216/5660/3106/2014/355/2048/3105/567/3107/8837/6362/1071	12		DOID:686	liver carcinoma	29/179	490/7865	0.0591837	2.60044	5.58285	1.6378e-06	3.71522e-05	2.99432e-05	7272/79980/1058/3181/1515/23492/259266/4176/6426/10733/55247/898/10797/2146/3925/7514/2305/7298/1033/8833/6502/983/1786/55143/83540/1789/84733/5111/8140	29		DOID:11394	adult respiratory distress syndrome	8/244	48/7865	0.166667	5.37227	5.43648	9.85541e-05	0.00110944	0.000700994	3553/5320/7124/3162/3383/5698/4318/6439
C0426817	Short ribs	5/286	60/21671	0.0833333	6.31439	4.76705	0.00116716	0.0358943	0.0305886	579/4921/132884/2121/5745	5		C4525301	Stage IIB Gallbladder Cancer AJCC v8	12/178	367/21671	0.0326975	3.98083	5.24121	5.4244e-05	0.0015501	0.0011055	216/5660/3106/2014/355/2048/3105/567/3107/8837/6362/1071	12		DOID:2355	anemia	16/179	187/7865	0.0855615	3.75945	5.82797	4.92329e-06	0.000106097	8.55098e-05	675/29127/1736/83990/2189/2175/81624/7516/55215/2187/2177/5888/9493/2176/29089/7398	16		DOID:12361	Graves' disease	8/244	48/7865	0.166667	5.37227	5.43648	9.85541e-05	0.00110944	0.000700994	3106/154/3553/355/2100/7124/3383/3605
C1306503	Congenital exomphalos	10/286	235/21671	0.0425532	3.22437	3.96485	0.00118522	0.0362018	0.0308506	4629/54453/285590/259232/3736/3339/716/4920/25802/117581	10		C4525302	Stage III Gallbladder Cancer AJCC v8	12/178	367/21671	0.0326975	3.98083	5.24121	5.4244e-05	0.0015501	0.0011055	216/5660/3106/2014/355/2048/3105/567/3107/8837/6362/1071	12		DOID:3905	lung carcinoma	23/179	357/7865	0.0644258	2.83077	5.40263	5.51032e-06	0.000113093	9.11482e-05	3181/10403/5426/23492/6241/7083/6426/4288/898/2146/7468/7514/23397/6502/157570/1786/83540/6240/4436/1789/8140/9656/1869	23		DOID:1564	fungal infectious disease	11/244	91/7865	0.120879	3.89637	4.97237	0.000107992	0.00119856	0.000757304	10333/64744/2512/3553/100/90865/7096/7124/1437/3087/51267
C0685409	Congenital Camptodactyly	7/286	123/21671	0.0569106	4.31227	4.26022	0.00125122	0.0379594	0.0323485	8642/9935/259232/29940/7169/84627/4920	7		C4525305	Stage IV Gallbladder Cancer AJCC v8	12/178	367/21671	0.0326975	3.98083	5.24121	5.4244e-05	0.0015501	0.0011055	216/5660/3106/2014/355/2048/3105/567/3107/8837/6362/1071	12		DOID:3459	breast carcinoma	15/179	170/7865	0.0882353	3.87693	5.78692	6.76927e-06	0.000132616	0.000106883	994/83990/5426/23492/5347/6241/10733/898/2146/6790/2956/993/4436/5111/9656	15		DOID:7148	rheumatoid arthritis	14/244	141/7865	0.0992908	3.2005	4.71759	0.000113828	0.00124578	0.000787144	120892/3566/3553/355/6891/2100/144811/7124/1232/3605/9047/3663/4318/6403
C0023051	Laryngeal Diseases	8/286	159/21671	0.0503145	3.81246	4.11626	0.00127023	0.0380222	0.032402	710/4323/8745/4907/4322/1803/11096/9242	8		C0279671	Cervical Squamous Cell Carcinoma	12/178	371/21671	0.032345	3.93791	5.1943	6.01742e-05	0.0017077	0.0012179	216/3106/3135/355/6401/5696/3105/22846/348/6890/8837/5698	12		DOID:5672	large intestine cancer	27/179	477/7865	0.0566038	2.48709	5.11364	9.0142e-06	0.00016188	0.000130469	675/83990/79980/11200/10403/5426/23492/6426/10733/4288/11004/25788/2146/7514/6790/7298/10036/2956/83540/699/81930/4436/1789/54821/8140/332/701	27		DOID:1532	pleural disease	6/244	27/7865	0.222222	7.16302	5.73963	0.000143431	0.0015457	0.000976646	6356/3553/7124/3162/3383/3605
C0023462	Acute Megakaryocytic Leukemias	8/286	159/21671	0.0503145	3.81246	4.11626	0.00127023	0.0380222	0.032402	399959/148979/84662/4629/10395/1490/7145/5739	8		C0014743	Erythema Nodosum	5/178	51/21671	0.0980392	11.936	7.11552	6.11347e-05	0.00171135	0.0012205	3106/3553/6401/5696/4065	5		DOID:9256	colorectal cancer	27/179	477/7865	0.0566038	2.48709	5.11364	9.0142e-06	0.00016188	0.000130469	675/83990/79980/11200/10403/5426/23492/6426/10733/4288/11004/25788/2146/7514/6790/7298/10036/2956/83540/699/81930/4436/1789/54821/8140/332/701	27		DOID:418	systemic scleroderma	11/244	94/7865	0.117021	3.77202	4.83762	0.000145155	0.0015457	0.000976646	3717/7097/3553/6891/2100/10109/246778/3383/6890/3605/4318
C1134719	Invasive Ductal Breast Carcinoma	14/286	414/21671	0.0338164	2.56236	3.71184	0.00128861	0.038265	0.0326089	9902/6591/2706/4323/3090/5745/3491/5054/7057/7078/10468/6387/5328/7291	14		C1334968	Nodular Lymphocyte Predominant Hodgkin Lymphoma	5/178	51/21671	0.0980392	11.936	7.11552	6.11347e-05	0.00171135	0.0012205	1844/2048/57379/3383/8837	5		DOID:170	endocrine gland cancer	21/179	317/7865	0.0662461	2.91076	5.29928	9.51774e-06	0.000164086	0.000132246	8438/675/1111/2189/3181/2175/23492/7516/6241/4176/4288/2146/7514/2305/5888/1786/83540/2176/1789/1869/701	21		DOID:2986	IgA glomerulonephritis	8/244	51/7865	0.156863	5.05625	5.19977	0.000153475	0.00161251	0.00101886	3579/3553/355/2204/6401/7096/7124/26762
C1956089	Osteophyte	6/286	91/21671	0.0659341	4.996	4.41752	0.0013078	0.038265	0.0326089	4314/4322/7057/3339/7043/1490	6		C0267750	Acute peritonitis	3/178	10/21671	0.3	36.5242	10.2253	6.26701e-05	0.00174248	0.0012427	1769/3553/3383	3		DOID:120	female reproductive organ cancer	21/179	329/7865	0.0638298	2.80459	5.10274	1.67921e-05	0.000272211	0.000219391	675/994/83990/2175/5426/5347/6241/7083/259266/995/898/6790/5888/983/2956/580/993/10615/9656/9212/891	21		DOID:2921	glomerulonephritis	17/244	201/7865	0.0845771	2.72623	4.43587	0.000159724	0.00165609	0.00104639	4353/3579/414062/3553/355/1285/2204/6401/7096/7124/348/2889/26762/7127/4321/4318/3990
C4049446	Neointimal hyperplasia	9/286	198/21671	0.0454545	3.44421	3.99561	0.00131243	0.038265	0.0326089	10371/4629/4323/284119/3491/5054/7220/6876/5328	9		C0002895	Anemia, Sickle Cell	13/178	434/21671	0.0299539	3.64681	5.06887	6.48142e-05	0.00177807	0.00126808	57817/3135/3553/355/6737/6401/3105/1118/3133/8542/348/3162/3383	13		DOID:10155	intestinal cancer	27/179	494/7865	0.0546559	2.4015	4.91011	1.70527e-05	0.000272211	0.000219391	675/83990/79980/11200/10403/5426/23492/6426/10733/4288/11004/25788/2146/7514/6790/7298/10036/2956/83540/699/81930/4436/1789/54821/8140/332/701	27		DOID:9098	sebaceous gland disease	4/244	10/7865	0.4	12.8934	6.73357	0.000163796	0.00167625	0.00105913	7097/3566/7124/3605
C4049796	Abnormality of cardiovascular system morphology	9/286	198/21671	0.0454545	3.44421	3.99561	0.00131243	0.038265	0.0326089	10371/9935/285590/5308/8516/9037/9464/30008/7291	9		C3241937	Nonalcoholic Steatohepatitis	13/178	434/21671	0.0299539	3.64681	5.06887	6.48142e-05	0.00177807	0.00126808	57817/216/140691/3553/355/1118/348/231/7293/8837/7852/151306/1071	13		DOID:3908	lung non-small cell carcinoma	21/179	338/7865	0.0621302	2.72991	4.961	2.52035e-05	0.000381737	0.000307665	3181/10403/5426/23492/6241/7083/6426/4288/898/2146/7468/7514/23397/157570/1786/83540/6240/4436/1789/8140/1869	21		DOID:9470	bacterial meningitis	5/244	18/7865	0.277778	8.95378	6.04462	0.000169686	0.00171426	0.00108315	64127/7097/8685/43/4318
C0410179	Ullrich congenital muscular dystrophy 1	3/286	17/21671	0.176471	13.3717	5.90121	0.00134851	0.0383535	0.0326843	1292/1291/633	3		C0566602	Primary sclerosing cholangitis	10/178	264/21671	0.0378788	4.61164	5.37303	6.88049e-05	0.00185797	0.00132507	57817/3106/3553/84870/57379/3105/3383/3107/8837/151306	10		DOID:1324	lung cancer	24/179	420/7865	0.0571429	2.51077	4.85613	2.56853e-05	0.000381737	0.000307665	3181/10403/5426/23492/6241/7083/6426/4288/898/2146/7468/7514/2305/23397/6502/157570/1786/83540/6240/4436/1789/8140/9656/1869	24		DOID:8677	perinatal necrotizing enterocolitis	6/244	28/7865	0.214286	6.9072	5.60269	0.000177858	0.0017519	0.00110693	10333/7097/3553/3588/7096/7124
C0423318	Heterochromia iridis	3/286	17/21671	0.176471	13.3717	5.90121	0.00134851	0.0383535	0.0326843	6591/2706/4286	3		C0241910	Autoimmune Chronic Hepatitis	9/178	213/21671	0.0422535	5.14425	5.53136	6.94362e-05	0.00185797	0.00132507	57817/3106/7253/3811/3553/355/6737/3105/3107	9		DOID:8719	in situ carcinoma	12/179	129/7865	0.0930233	4.08731	5.39529	3.44367e-05	0.00049474	0.000398741	675/7153/6426/4288/898/6790/6502/83540/4436/332/9212/891	12		DOID:9065	leishmaniasis	6/244	28/7865	0.214286	6.9072	5.60269	0.000177858	0.0017519	0.00110693	7097/7124/3162/1232/1437/3605
C1834674	BETHLEM MYOPATHY 1	3/286	17/21671	0.176471	13.3717	5.90121	0.00134851	0.0383535	0.0326843	1292/1291/3339	3		C0007682	CNS disorder	11/178	319/21671	0.0344828	4.19818	5.23685	6.95327e-05	0.00185797	0.00132507	101/7253/3553/5777/4245/348/3162/3383/7852/54209/2358	11		DOID:0050615	respiratory system cancer	24/179	430/7865	0.055814	2.45238	4.72687	3.7667e-05	0.000508903	0.000410155	3181/10403/5426/23492/6241/7083/6426/4288/898/2146/7468/7514/2305/23397/6502/157570/1786/83540/6240/4436/1789/8140/9656/1869	24		DOID:7147	ankylosing spondylitis	6/244	29/7865	0.206897	6.66902	5.47231	0.000218495	0.00212561	0.00134306	3717/3106/6891/6890/3605/5698
C0221357	Brachydactyly	12/286	325/21671	0.0369231	2.79776	3.77636	0.00135605	0.0383535	0.0326843	132884/2121/4882/2706/9935/5745/54453/285590/633/2702/7291/4920	12		C0206062	Lung Diseases, Interstitial	11/178	319/21671	0.0344828	4.19818	5.23685	6.95327e-05	0.00185797	0.00132507	340061/3384/3106/3553/355/6737/1118/3383/7852/6362/3663	11		DOID:0081332	progeroid syndrome	5/179	18/7865	0.277778	12.2052	7.26274	3.88944e-05	0.000508903	0.000410155	1763/84823/641/80119/4001	5		DOID:0050292	primary systemic mycosis	4/244	11/7865	0.363636	11.7213	6.36663	0.000251143	0.00241343	0.00152491	3553/100/90865/7124
C0000846	Agenesis	8/286	161/21671	0.0496894	3.7651	4.07251	0.00137569	0.0383535	0.0326843	5075/132884/5308/64388/4322/57167/7043/9242	8		C0032914	Pre-Eclampsia	8/178	166/21671	0.0481928	5.86733	5.72884	7.08298e-05	0.00188042	0.00134108	23526/3135/6891/5742/6401/3162/3383/6890	8		DOID:3347	osteosarcoma	6/179	29/7865	0.206897	9.09073	6.66097	3.92699e-05	0.000508903	0.000410155	675/11200/2146/2956/4436/1869	6		DOID:3770	pulmonary fibrosis	12/244	117/7865	0.102564	3.30601	4.49645	0.000258921	0.00245409	0.00155061	6356/6366/3553/10800/7124/3383/1437/3605/8837/4318/6439/2643
C0152171	Idiopathic pulmonary hypertension	8/286	161/21671	0.0496894	3.7651	4.07251	0.00137569	0.0383535	0.0326843	55384/59/6591/5054/7220/5739/7291/3037	8		C0038826	Superinfection	6/178	85/21671	0.0705882	8.59392	6.38382	7.21304e-05	0.00190267	0.00135695	2323/3106/3553/3105/3107/7852	6		DOID:3910	lung adenocarcinoma	12/179	131/7865	0.0916031	4.02491	5.32774	4.01455e-05	0.000508903	0.000410155	23492/6426/4288/2146/7514/157570/1786/83540/4436/1789/8140/1869	12		DOID:576	proteinuria	15/244	171/7865	0.0877193	2.82751	4.32307	0.000261604	0.00245409	0.00155061	6356/344/5265/3553/1514/81615/4792/348/567/3383/3605/7852/26762/3990/30011
C1184923	Lumbar hyperlordosis	6/286	92/21671	0.0652174	4.9417	4.38147	0.00138383	0.0383535	0.0326843	1292/4882/3490/633/3339/7169	6		C0234251	Inflammatory pain	10/178	266/21671	0.037594	4.57696	5.34181	7.32593e-05	0.00192014	0.00136941	64805/51237/3106/1844/3553/5777/2048/4245/3162/7852	10		DOID:0060071	pre-malignant neoplasm	13/179	156/7865	0.0833333	3.66155	5.12384	5.19119e-05	0.000639258	0.000515216	675/7153/6426/4288/898/6790/6502/83540/4436/332/9212/891/90417	13		DOID:10247	pleurisy	5/244	20/7865	0.25	8.0584	5.65504	0.000291822	0.00267391	0.0016895	6356/3553/7124/3383/3605
C0031090	Periodontal Diseases	12/286	326/21671	0.0368098	2.78918	3.7642	0.00139169	0.0383535	0.0326843	5654/2252/5919/4314/5054/4322/7078/10085/7043/6387/5328/9242	12		C0494261	Combined immunodeficiency	6/178	86/21671	0.0697674	8.49399	6.33691	7.70171e-05	0.00200586	0.00143054	57379/3105/970/7293/567/3107	6		DOID:0080365	endometrial hyperplasia	4/179	11/7865	0.363636	15.9777	7.58565	7.55593e-05	0.000904613	0.000729081	994/995/6502/332	4		DOID:2475	chronic conjunctivitis	5/244	20/7865	0.25	8.0584	5.65504	0.000291822	0.00267391	0.0016895	6356/3566/355/5320/3383
C0239337	Deformity of limb	4/286	37/21671	0.108108	8.19165	5.06312	0.00139234	0.0383535	0.0326843	57167/9464/7169/7291	4		C0238190	Inclusion Body Myositis (disorder)	6/178	87/21671	0.0689655	8.39636	6.29075	8.21642e-05	0.00212581	0.00151608	5699/3553/2048/6737/348/3107	6		DOID:10534	stomach cancer	16/179	245/7865	0.0653061	2.86946	4.53648	0.000137566	0.00155907	0.00125655	10403/5426/23492/259266/6426/4288/2146/7514/2305/83540/81930/1789/5111/8140/332/9656	16		DOID:2043	hepatitis B	8/244	56/7865	0.142857	4.6048	4.84382	0.00029954	0.00268224	0.00169477	355/3588/246778/7124/4792/3455/4615/1232
C0241868	acute aortic dissection	5/286	63/21671	0.0793651	6.01371	4.60872	0.00145472	0.0395764	0.0337265	59/4314/5054/7057/1490	5		C0221056	Adult type dermatomyositis	9/178	218/21671	0.0412844	5.02626	5.43722	8.29528e-05	0.00212581	0.00151608	340061/3106/3553/5742/6737/3105/1118/3107/7852	9		DOID:0080639	bone sarcoma	6/179	36/7865	0.166667	7.32309	5.80264	0.000141076	0.00155907	0.00125655	675/11200/2146/2956/4436/1869	6		DOID:272	hepatic vascular disease	8/244	56/7865	0.142857	4.6048	4.84382	0.00029954	0.00268224	0.00169477	3717/1621/3553/22846/7124/3162/4318/2643
C1855340	Bowing of the long bones	5/286	63/21671	0.0793651	6.01371	4.60872	0.00145472	0.0395764	0.0337265	4882/5745/285590/4322/3339	5		C0085580	Essential Hypertension	13/178	445/21671	0.0292135	3.55666	4.95918	8.3382e-05	0.00212581	0.00151608	10911/3106/6036/5973/6368/6401/3105/8542/348/231/7293/3162/7941	13		DOID:184	bone cancer	6/179	36/7865	0.166667	7.32309	5.80264	0.000141076	0.00155907	0.00125655	675/11200/2146/2956/4436/1869	6		DOID:4251	conjunctival disease	6/244	31/7865	0.193548	6.23876	5.22912	0.000321507	0.0028466	0.00179862	6356/3566/355/5320/3383/4318
C1844704	Platyspondyly	6/286	93/21671	0.0645161	4.88856	4.34593	0.00146318	0.0395764	0.0337265	4921/5745/633/649/4322/3339	6		C0242510	Drug usage	8/178	170/21671	0.0470588	5.72928	5.63354	8.3689e-05	0.00212581	0.00151608	3106/3553/5742/6401/116071/348/231/7852	8		DOID:0050569	Seckel syndrome	4/179	13/7865	0.307692	13.5196	6.89395	0.000157961	0.00170203	0.00137177	22995/1763/55835/10293	4		DOID:3393	coronary artery disease	28/244	453/7865	0.0618102	1.99236	3.89281	0.000348458	0.00305094	0.00192773	4625/57514/3717/64127/217/3566/154/5265/3553/2688/2100/6401/90865/7124/4792/2837/348/3162/3383/1232/1437/221692/3605/4321/4318/3990/2643/6403
C0345967	Malignant mesothelioma	14/286	420/21671	0.0333333	2.52576	3.65156	0.00147453	0.0396444	0.0337844	10371/9843/4323/55679/1803/8828/683/6320/8817/1490/26524/6387/9260/5328	14		C4014733	Follicular hyperplasia	3/178	11/21671	0.272727	33.2038	9.72221	8.56508e-05	0.00216229	0.0015421	340061/355/115650	3		DOID:0050622	reproductive organ benign neoplasm	5/179	26/7865	0.192308	8.44972	5.80623	0.000257567	0.00270759	0.00218221	994/7153/995/6502/332	5		DOID:869	cholesteatoma	5/244	21/7865	0.238095	7.67467	5.48001	0.000373408	0.00323347	0.00204305	7097/3553/7124/3383/4318
C0334579	Anaplastic astrocytoma	9/286	202/21671	0.0445545	3.37601	3.92352	0.00150709	0.0402787	0.034325	3915/92745/4314/5054/7057/1490/26524/6387/5328	9		C0741796	Recurrent bronchitis	4/178	29/21671	0.137931	16.7927	7.74458	8.90122e-05	0.00223345	0.00159285	6891/115650/6890/6892	4		DOID:8923	skin melanoma	5/179	27/7865	0.185185	8.13677	5.66864	0.000310329	0.00318456	0.00256663	675/2175/8208/2177/1789	5		DOID:8893	psoriasis	10/244	89/7865	0.11236	3.62175	4.45061	0.000405456	0.00347282	0.00219429	7097/154/6891/7124/348/3383/3107/6890/3605/5698
C0239399	Short extremities	4/286	38/21671	0.105263	7.97608	4.9774	0.00154017	0.0408315	0.034796	4921/132884/4882/4920	4		C1719495	Aggressive periodontitis, generalized	5/178	56/21671	0.0892857	10.8703	6.73034	9.61722e-05	0.00239848	0.00171055	3106/3553/6401/3105/348	5		DOID:4362	cervical cancer	9/179	102/7865	0.0882353	3.87693	4.46285	0.000497915	0.00499073	0.00402232	83990/2175/7083/995/983/993/10615/9656/891	9		DOID:438	autoimmune disease of the nervous system	6/244	33/7865	0.181818	5.86066	5.00641	0.000459154	0.00389047	0.00245818	326/154/355/2100/43/4318
C0016781	Fuchs Endothelial Dystrophy	6/286	94/21671	0.0638298	4.83656	4.3109	0.00154596	0.0408315	0.034796	3915/5308/2252/163782/84627/5793	6		C0017658	Glomerulonephritis	12/178	391/21671	0.0306905	3.73649	4.9692	9.89956e-05	0.00244605	0.00174447	3553/355/1285/6737/6401/3105/8542/348/231/3383/7852/3663	12		DOID:3070	high grade glioma	13/179	199/7865	0.0653266	2.87036	4.07817	0.000588195	0.00576164	0.00464364	675/284403/5426/23492/259266/4288/3070/8208/2146/10036/8140/332/1869	13		DOID:10325	silicosis	5/244	22/7865	0.227273	7.32582	5.31616	0.00047112	0.00390781	0.00246914	10109/7124/3162/1437/8685
C0029182	orbit (eye disorders)	5/286	64/21671	0.078125	5.91974	4.5582	0.00156124	0.0409939	0.0349344	5961/4907/5054/6387/3037	5		C0701807	Acute anterior uveitis	6/178	90/21671	0.0666667	8.11648	6.15661	9.92685e-05	0.00244605	0.00174447	3106/3811/3553/3105/5698/3663	6		DOID:0050687	cell type cancer	22/179	464/7865	0.0474138	2.08329	3.67078	0.000807388	0.00773298	0.00623247	675/284403/11200/5426/23492/259266/4288/3070/57082/890/8208/2146/10036/6502/983/1786/83540/4436/5111/8140/332/1869	22		DOID:1407	anterior uveitis	5/244	22/7865	0.227273	7.32582	5.31616	0.00047112	0.00390781	0.00246914	7097/3106/414062/7124/3383
C0012736	Dissecting aortic aneurysm	3/286	18/21671	0.166667	12.6288	5.70781	0.00160251	0.0415911	0.0354433	59/4629/633	3		C0276501	Human immunodeficiency virus II infection	4/178	30/21671	0.133333	16.233	7.59796	0.00010205	0.00248484	0.00177214	3106/3811/3162/8837	4		DOID:8692	myeloid leukemia	12/179	182/7865	0.0659341	2.89705	3.95136	0.00088045	0.00824944	0.00664871	7153/2175/23492/6426/4605/2146/7298/8833/1786/2176/1789/1869	12		DOID:535	sleep disorder	9/244	75/7865	0.12	3.86803	4.46536	0.000483165	0.00396598	0.00250589	3553/5243/10800/4914/7124/3162/3383/4318/6439
C0025221	Meleda Disease	3/286	18/21671	0.166667	12.6288	5.70781	0.00160251	0.0415911	0.0354433	2706/6387/5328	3		C0854094	HIV-2 infection	4/178	30/21671	0.133333	16.233	7.59796	0.00010205	0.00248484	0.00177214	3106/3811/3162/8837	4		DOID:201	connective tissue cancer	7/179	69/7865	0.101449	4.45753	4.40203	0.000923643	0.00847001	0.00682648	675/11200/2146/2956/4436/8140/1869	7		DOID:783	end stage renal disease	13/244	144/7865	0.0902778	2.90998	4.13889	0.000509024	0.00408243	0.00257947	4353/7097/3579/154/344/3553/1286/5243/1285/7124/348/3383/3990
C0035078	Kidney Failure	13/286	378/21671	0.0343915	2.60594	3.64263	0.00163899	0.0422934	0.0360418	415/10371/84662/5745/5054/1803/3339/5311/8516/10979/1490/5328/4311	13		C0023492	Leukemia, T-Cell	13/178	457/21671	0.0284464	3.46327	4.84339	0.000108739	0.00263213	0.00187719	3106/6275/7114/3553/5777/355/2048/57379/3105/7293/3383/115727/7852	13		DOID:74	hematopoietic system disease	18/179	349/7865	0.0515759	2.26617	3.69241	0.000952957	0.00855676	0.0068964	675/29127/1736/83990/2189/2175/81624/7516/4288/55215/2187/2177/5888/9493/84930/2176/29089/7398	18		DOID:0060704	lymphoproliferative syndrome	4/244	13/7865	0.307692	9.91803	5.75786	0.000518074	0.00408243	0.00257947	355/6891/970/567
C1298820	Aneurysm of aortic root	4/286	39/21671	0.102564	7.77156	4.89475	0.00169857	0.0435805	0.0371387	59/4629/7043/7169	4		C0024790	Paroxysmal nocturnal hemoglobinuria	7/178	132/21671	0.0530303	6.45629	5.72219	0.000111482	0.00268275	0.00191328	2323/3811/3553/355/3105/3107/7852	7		DOID:1245	vulva cancer	3/179	10/7865	0.3	13.1816	5.88204	0.00123647	0.0108631	0.00875521	994/995/993	3		DOID:11396	pulmonary edema	4/244	13/7865	0.307692	9.91803	5.75786	0.000518074	0.00408243	0.00257947	154/100/90865/7124
C0476403	Electromyogram abnormal	7/286	130/21671	0.0538462	4.08007	4.0734	0.00172173	0.0439238	0.0374312	1292/91624/9935/1291/3736/3339/5350	7		C1142272	Neutrophilic dermatosis	3/178	12/21671	0.25	30.4368	9.28224	0.000113511	0.00270798	0.00193128	3553/5777/5696	3		DOID:229	female reproductive system disease	13/179	216/7865	0.0601852	2.64445	3.73976	0.00126022	0.0108631	0.00875521	2175/5347/7516/9156/2146/5888/1786/2956/84515/4436/1789/332/39	13		DOID:437	myasthenia gravis	4/244	13/7865	0.307692	9.91803	5.75786	0.000518074	0.00408243	0.00257947	154/355/2100/43
C1837084	Short metacarpal	5/286	66/21671	0.0757576	5.74036	4.4603	0.00179132	0.0454408	0.038724	4921/4882/5745/633/4920	5		C0021345	Infectious Mononucleosis	5/178	58/21671	0.0862069	10.4954	6.58966	0.000113847	0.00270798	0.00193128	3106/3811/3553/3105/5698	5		DOID:0060122	integumentary system cancer	6/179	54/7865	0.111111	4.88206	4.36821	0.00133336	0.0110515	0.00890704	675/2175/8208/2177/1789/90417	6		DOID:10762	portal hypertension	7/244	47/7865	0.148936	4.80075	4.67607	0.000552661	0.00418747	0.00264584	3717/1621/3553/22846/7124/3162/2643
C0342895	Fish-Eye Disease	3/286	19/21671	0.157895	11.9641	5.52916	0.00188451	0.0472707	0.0402835	5308/6560/5793	3		C0154830	Proliferative diabetic retinopathy	8/178	180/21671	0.0444444	5.41099	5.40797	0.000124519	0.0029448	0.00210017	3106/7114/3553/348/231/3162/3383/7941	8		DOID:4159	skin cancer	6/179	54/7865	0.111111	4.88206	4.36821	0.00133336	0.0110515	0.00890704	675/2175/8208/2177/1789/90417	6		DOID:12365	malaria	7/244	47/7865	0.148936	4.80075	4.67607	0.000552661	0.00418747	0.00264584	2995/5243/7124/348/3162/2532/3383
C1865841	Flared iliac wings	3/286	19/21671	0.157895	11.9641	5.52916	0.00188451	0.0472707	0.0402835	4921/633/4322	3		C3853540	Aspirin exacerbated respiratory disease	6/178	94/21671	0.0638298	7.7711	5.98713	0.000126353	0.00297109	0.00211892	3553/6891/5742/6890/6362/6892	6		DOID:5426	primary ovarian insufficiency	7/179	75/7865	0.0933333	4.10093	4.11768	0.00151579	0.0123265	0.00993468	2175/7516/9156/5888/2956/84515/4436	7		DOID:4780	anti-basement membrane glomerulonephritis	7/244	47/7865	0.148936	4.80075	4.67607	0.000552661	0.00418747	0.00264584	9560/3553/7124/2889/3605/4321/6403
C2945695	Limb ischemia	8/286	171/21671	0.0467836	3.54492	3.86377	0.002012	0.049979	0.0425914	2246/80781/59/633/10085/3693/5328/9242	8		C0007282	Carotid Stenosis	7/178	135/21671	0.0518519	6.31282	5.63508	0.000128284	0.00299937	0.00213909	101/1118/348/3162/7941/7852/54209	7		DOID:0060086	female reproductive organ benign neoplasm	4/179	23/7865	0.173913	7.64149	4.86759	0.00163721	0.0128298	0.0103403	994/995/6502/332	4		DOID:9808	Goodpasture syndrome	7/244	47/7865	0.148936	4.80075	4.67607	0.000552661	0.00418747	0.00264584	9560/3553/7124/2889/3605/4321/6403
C0278595	Adult Fibrosarcoma	13/286	387/21671	0.0335917	2.54534	3.5474	0.00201474	0.049979	0.0425914	55384/2246/4323/9935/633/4314/2192/5054/4322/7057/3339/1490/5328	13		C3860213	Autoinflammatory disorder	5/178	60/21671	0.0833333	10.1456	6.45567	0.000133912	0.00311326	0.00222032	340061/3106/3553/5696/5336	5		DOID:0060095	uterine benign neoplasm	4/179	23/7865	0.173913	7.64149	4.86759	0.00163721	0.0128298	0.0103403	994/995/6502/332	4		DOID:9538	multiple myeloma	10/244	94/7865	0.106383	3.42911	4.23919	0.000629588	0.00472491	0.00298542	5371/2323/3566/3553/4094/7124/4792/348/567/3383
													C0085655	Polymyositis	8/178	183/21671	0.0437158	5.32228	5.34357	0.000139564	0.00320841	0.00228818	10866/3106/3553/5742/1118/3107/7852/3663	8		DOID:0080918	polymicrogyria	3/179	11/7865	0.272727	11.9832	5.56262	0.00167182	0.012867	0.0103703	84790/284403/10376	3		DOID:0080998	acute necrotizing pancreatitis	6/244	35/7865	0.171429	5.52576	4.80126	0.000638873	0.00474936	0.00300086	7097/3553/4792/3383/3605/6403
LumA-ceRM4													C0341106	Eosinophilic esophagitis	8/178	183/21671	0.0437158	5.32228	5.34357	0.000139564	0.00320841	0.00228818	283710/6036/3553/27181/7293/3383/6362/5008	8		DOID:3068	glioblastoma	7/179	77/7865	0.0909091	3.99441	4.02942	0.00176799	0.013138	0.0105887	5426/23492/259266/8208/2146/8140/1869	7		DOID:13138	acute proliferative glomerulonephritis	4/244	14/7865	0.285714	9.2096	5.50091	0.000707742	0.00512996	0.00324135	414062/3553/4321/4318
ID	Description	GeneRatio	BgRatio	RichFactor	FoldEnrichment	zScore	pvalue	p.adjust	qvalue	geneID	Count		C0238790	bone destruction	9/178	234/21671	0.0384615	4.68258	5.1543	0.000141958	0.00324531	0.00231449	101/6275/3553/2048/3162/567/50619/7852/54209	9		DOID:5517	stomach carcinoma	7/179	77/7865	0.0909091	3.99441	4.02942	0.00176799	0.013138	0.0105887	5426/23492/7514/1789/8140/332/9656	7		DOID:13139	crescentic glomerulonephritis	4/244	14/7865	0.285714	9.2096	5.50091	0.000707742	0.00512996	0.00324135	414062/3553/4321/4318
C2362324	Pediatric Obesity	10/51	191/21671	0.052356	22.2472	14.3248	2.08508e-11	3.5488e-08	2.46258e-08	5346/5105/2167/3240/4023/5950/3952/9370/364/64102	10		C0019911	Hookworm Infections	3/178	13/21671	0.230769	28.0955	8.89305	0.000146674	0.00327723	0.00233726	3135/3553/1118	3		DOID:8618	oral cavity cancer	8/179	101/7865	0.0792079	3.48028	3.8284	0.00205286	0.0149963	0.0120864	8208/2146/6502/1789/84733/8140/332/701	8		DOID:0050339	commensal bacterial infectious disease	7/244	49/7865	0.142857	4.6048	4.52895	0.000716112	0.00512996	0.00324135	3106/154/7124/4792/3162/3605/6439
C0271694	Familial partial lipodystrophy	6/51	28/21671	0.214286	91.0546	23.1586	4.53812e-11	3.86194e-08	2.67988e-08	5346/3991/4023/3952/9370/63924	6		C0040149	Subacute thyroiditis	3/178	13/21671	0.230769	28.0955	8.89305	0.000146674	0.00327723	0.00233726	57817/3106/7253	3		DOID:0112182	mismatch repair cancer syndrome	3/179	12/7865	0.25	10.9846	5.28206	0.00219198	0.0157457	0.0126904	5426/2956/4436	3		DOID:2913	acute pancreatitis	7/244	49/7865	0.142857	4.6048	4.52895	0.000716112	0.00512996	0.00324135	7097/5265/3553/4792/3383/3605/6403
C1720860	Familial Partial Lipodystrophy, Type 2	5/51	16/21671	0.3125	132.788	25.612	2.52758e-10	1.21673e-07	8.44311e-08	5346/3991/4023/3952/63924	5		C0085581	Restrictive lung disease	3/178	13/21671	0.230769	28.0955	8.89305	0.000146674	0.00327723	0.00233726	57817/3106/3553	3		DOID:0060100	musculoskeletal system cancer	7/179	83/7865	0.0843373	3.70566	3.78151	0.0027237	0.0185749	0.0149706	675/11200/2146/2956/4436/8140/1869	7		DOID:13141	uveitis	8/244	65/7865	0.123077	3.96721	4.29802	0.000837224	0.00593615	0.00375073	7097/3106/414062/3553/3105/7124/3383/3605
C0020557	Hypertriglyceridemia	11/51	340/21671	0.0323529	13.7475	11.5065	3.28294e-10	1.21673e-07	8.44311e-08	5346/3991/124/4023/5950/948/2819/3952/9370/63924/50486	11		C1567742	Alport Syndrome, X-Linked	3/178	13/21671	0.230769	28.0955	8.89305	0.000146674	0.00327723	0.00233726	1286/1285/348	3		DOID:1542	head and neck carcinoma	6/179	62/7865	0.0967742	4.25212	3.9231	0.00273232	0.0185749	0.0149706	2189/55215/2187/2176/1789/8140	6		DOID:1679	cystitis	6/244	37/7865	0.162162	5.22707	4.61132	0.000868813	0.00593615	0.00375073	4353/154/3553/2100/7124/1437
C4022459	Decreased adipose tissue	5/51	17/21671	0.294118	124.977	24.8361	3.5744e-10	1.21673e-07	8.44311e-08	2167/4023/5950/948/9370	5		C2936719	Mechanical Allodynia	12/178	408/21671	0.0294118	3.5808	4.7892	0.000147336	0.00327723	0.00233726	64805/10911/1844/3553/2048/6891/5742/3107/10062/7852/3663/54209	12		DOID:5520	head and neck squamous cell carcinoma	6/179	62/7865	0.0967742	4.25212	3.9231	0.00273232	0.0185749	0.0149706	2189/55215/2187/2176/1789/8140	6		DOID:13378	Kawasaki disease	5/244	25/7865	0.2	6.44672	4.88043	0.000880894	0.00593615	0.00375073	3553/7124/3162/4318/6403
C1096293	Macroangiopathy	5/51	31/21671	0.16129	68.5357	18.2756	9.57435e-09	2.40678e-06	1.67011e-06	3240/4023/948/3952/9370	5		C0574960	Sacroiliitis	4/178	33/21671	0.121212	14.7572	7.19732	0.000149478	0.00329207	0.00234784	3106/3553/3105/3107	4		DOID:0050865	tongue squamous cell carcinoma	5/179	43/7865	0.116279	5.10913	4.1231	0.00275823	0.0185749	0.0149706	2189/55215/2187/2176/8140	5		DOID:1602	lymphadenitis	5/244	25/7865	0.2	6.44672	4.88043	0.000880894	0.00593615	0.00375073	3553/7124/3162/4318/6403
C0242339	Dyslipidemias	11/51	471/21671	0.0233546	9.92386	9.51003	9.89861e-09	2.40678e-06	1.67011e-06	10216/3991/2167/3240/4023/5950/948/3952/9370/7079/63924	11		C0020473	Hyperlipidemia	13/178	472/21671	0.0275424	3.35321	4.70397	0.000149603	0.00329207	0.00234784	57817/3106/341/3553/2048/5742/348/231/3162/7941/10062/5008/1071	13		DOID:2729	dyskeratosis congenita	3/179	13/7865	0.230769	10.1397	5.0328	0.00280219	0.0185806	0.0149752	1736/7298/64858	3		DOID:6195	conjunctivitis	5/244	25/7865	0.2	6.44672	4.88043	0.000880894	0.00593615	0.00375073	6356/3566/355/5320/3383
C4316789	Partial lipodystrophy	4/51	14/21671	0.285714	121.406	21.8877	2.67593e-08	5.69303e-06	3.95051e-06	5346/3952/9370/63924	4		C0340076	Asthmatic pulmonary eosinophilia	5/178	62/21671	0.0806452	9.81832	6.32784	0.000156578	0.00342723	0.00244423	64805/6036/3553/27181/3162	5		DOID:1380	endometrial cancer	9/179	131/7865	0.0687023	3.01868	3.55549	0.00292831	0.0191228	0.0154122	675/994/5426/6241/995/6790/2956/9212/891	9		DOID:9942	lymph node disease	5/244	25/7865	0.2	6.44672	4.88043	0.000880894	0.00593615	0.00375073	3553/7124/3162/4318/6403
C0023787	Lipodystrophy	8/51	226/21671	0.0353982	15.0415	10.306	5.3509e-08	9.77433e-06	6.78261e-06	5346/3991/5105/2167/4023/3952/9370/63924	8		C0017152	Gastritis	10/178	292/21671	0.0342466	4.16942	4.96214	0.000157493	0.00342901	0.0024455	2512/3553/355/5742/57379/27181/6401/1118/3162/3383	10		DOID:363	uterine cancer	9/179	136/7865	0.0661765	2.9077	3.42464	0.00376379	0.0240086	0.01935	675/994/5426/6241/995/6790/2956/9212/891	9		DOID:5082	liver cirrhosis	16/244	212/7865	0.0754717	2.43273	3.78378	0.000881382	0.00593615	0.00375073	4353/3717/217/5265/3553/355/9020/90865/246778/22846/7124/3162/3383/3663/4318/2643
C3241937	Nonalcoholic Steatohepatitis	10/51	434/21671	0.0230415	9.79082	8.98492	5.74285e-08	9.77433e-06	6.78261e-06	2167/124/3240/125/5950/152831/1357/948/3952/9370	10		C0033687	Proteinuria	9/178	239/21671	0.0376569	4.58462	5.0711	0.000166368	0.00360318	0.00256972	3106/355/1286/1285/8542/348/3162/567/3383	9		DOID:0050866	oral squamous cell carcinoma	7/179	88/7865	0.0795455	3.49511	3.59189	0.0037879	0.0240086	0.01935	8208/2146/6502/1789/84733/8140/332	7		DOID:9146	visceral leishmaniasis	4/244	15/7865	0.266667	8.59563	5.26848	0.000941759	0.00628903	0.0039737	7124/3162/1232/1437
C2936179	Obesity, Visceral	5/51	55/21671	0.0909091	38.6292	13.5708	1.87872e-07	2.9069e-05	2.01716e-05	4023/5950/3952/9370/63924	5		C0268318	Cholestasis of pregnancy	6/178	100/21671	0.06	7.30483	5.75081	0.000177635	0.00382705	0.00272938	3106/3553/3105/348/3107/151306	6		DOID:9119	acute myeloid leukemia	9/179	138/7865	0.0652174	2.86556	3.37397	0.00414614	0.0258984	0.020873	7153/2175/4605/2146/7298/8833/1786/2176/1789	9		DOID:5041	esophageal cancer	13/244	155/7865	0.083871	2.70346	3.8325	0.00102093	0.00676047	0.00427158	3717/3553/355/6891/5742/3162/4615/6890/7852/5698/4321/4318/864
C0028756	Obesity, Morbid	7/51	203/21671	0.0344828	14.6525	9.49183	4.65968e-07	6.60898e-05	4.58611e-05	5346/3991/4023/948/3952/9370/364	7		C0020452	Hyperemia	5/178	64/21671	0.078125	9.5115	6.20569	0.000182065	0.00390207	0.00278288	64805/3553/5742/348/5008	5		DOID:12558	chronic progressive external ophthalmoplegia	3/179	15/7865	0.2	8.78771	4.607	0.00431122	0.0264026	0.0212794	7084/1763/6240	3		DOID:4362	cervical cancer	10/244	102/7865	0.0980392	3.16016	3.92899	0.00119467	0.00784498	0.00495682	1890/3106/51752/3553/5777/6891/5742/7124/7293/6890
C0007282	Carotid Stenosis	6/51	135/21671	0.0444444	18.8854	10.1244	7.47754e-07	9.15067e-05	6.34984e-05	2167/3240/4023/3952/9370/7079	6		C0016053	Fibromyalgia	7/178	143/21671	0.048951	5.95965	5.41512	0.000183344	0.00390912	0.0027879	3106/341/7253/3553/355/3105/348	7		DOID:11934	head and neck cancer	6/179	68/7865	0.0882353	3.87693	3.63595	0.00434938	0.0264026	0.0212794	2189/55215/2187/2176/1789/8140	6		DOID:799	varicose veins	4/244	16/7865	0.25	8.0584	5.05673	0.00122534	0.00797988	0.00504205	3553/355/3162/4318
C0024668	Mammary Neoplasms, Experimental	7/51	218/21671	0.0321101	13.6443	9.11307	7.52699e-07	9.15067e-05	6.34984e-05	2167/3240/4023/5950/3952/9370/50486	7		C0035012	Reiter Syndrome	3/178	14/21671	0.214286	26.0887	8.54543	0.000185549	0.00393575	0.0028069	3106/6891/6890	3		DOID:8991	cervix uteri carcinoma in situ	5/179	48/7865	0.104167	4.57693	3.79323	0.00447825	0.0264401	0.0213096	7153/6426/898/6502/4436	5		DOID:1927	sphingolipidosis	5/244	27/7865	0.185185	5.96919	4.62781	0.00127245	0.00815193	0.00515076	5660/10577/201305/7124/348
C1720861	Familial Partial Lipodystrophy, Type 3	3/51	10/21671	0.3	127.476	19.4293	1.45642e-06	0.000165255	0.000114674	5346/3991/63924	3		C1306889	Peripheral arterial occlusive disease	4/178	35/21671	0.114286	13.914	6.95819	0.000188835	0.0039849	0.00284195	355/348/3383/7941	4		DOID:9108	uterus carcinoma in situ	5/179	48/7865	0.104167	4.57693	3.79323	0.00447825	0.0264401	0.0213096	7153/6426/898/6502/4436	5		DOID:9471	meningitis	5/244	27/7865	0.185185	5.96919	4.62781	0.00127245	0.00815193	0.00515076	64127/7097/8685/43/4318
C1837764	Loss of subcutaneous adipose tissue in limbs	3/51	11/21671	0.272727	115.888	18.5109	1.99925e-06	0.000212671	0.000147576	5346/3991/63924	3		C0039101	synovial sarcoma	10/178	299/21671	0.0334448	4.07181	4.86742	0.000190725	0.00400424	0.00285575	216/6275/3553/2048/6401/3105/3383/3107/6890/7852	10		DOID:2394	ovarian cancer	11/179	194/7865	0.056701	2.49136	3.20964	0.00466406	0.027165	0.0218939	675/2175/5426/5347/259266/898/6790/5888/2956/580/891	11		DOID:3118	hepatobiliary disease	22/244	353/7865	0.0623229	2.00889	3.47029	0.00137232	0.0087209	0.00551027	4353/3717/217/5265/3553/355/5243/9020/90865/246778/22846/7124/4792/348/8482/3162/3383/3663/953/4318/3990/2643
C0021655	Insulin Resistance	6/51	162/21671	0.037037	15.7378	9.14467	2.16867e-06	0.000217122	0.000150666	3991/2167/948/3952/9370/2878	6		C0002390	Extrinsic allergic alveolitis	5/178	65/21671	0.0769231	9.36517	6.1466	0.000195937	0.00409279	0.0029189	3553/5696/6890/6362/5698	5		DOID:0080199	colorectal carcinoma	8/179	117/7865	0.0683761	3.00435	3.33326	0.00509715	0.0292916	0.0236079	675/23492/2146/7514/7298/2956/1789/8140	8		DOID:409	liver disease	18/244	265/7865	0.0679245	2.18945	3.52431	0.00144851	0.00913142	0.00576965	4353/3717/217/5265/3553/355/9020/90865/246778/22846/7124/4792/3162/3383/3663/4318/3990/2643
C0020474	Hyperlipidemia, Familial Combined	5/51	91/21671	0.0549451	23.3473	10.3755	2.35651e-06	0.000222821	0.00015462	3991/4023/948/3952/9370	5		C0042170	Uveomeningoencephalitic Syndrome	6/178	102/21671	0.0588235	7.1616	5.67635	0.000197964	0.00411426	0.00293421	3106/3811/3553/355/3105/3107	6		DOID:8552	chronic myeloid leukemia	5/179	54/7865	0.0925926	4.06838	3.45264	0.00741505	0.0418996	0.0337694	6426/2146/1786/1789/1869	5		DOID:3480	uveal disease	8/244	71/7865	0.112676	3.63196	3.98601	0.00150442	0.00929351	0.00587207	7097/3106/414062/3553/3105/7124/3383/3605
C0852036	Pregnancy associated hypertension	6/51	186/21671	0.0322581	13.7071	8.45325	4.81841e-06	0.000431628	0.000299516	3991/2167/3240/4023/3952/9370	6		C0001486	Adenovirus Infections	7/178	145/21671	0.0482759	5.87745	5.36273	0.00019973	0.0041301	0.0029455	23601/340061/3553/4624/3162/3383/3107	7		DOID:10286	prostate carcinoma	6/179	76/7865	0.0789474	3.46883	3.30032	0.00748554	0.0418996	0.0337694	5347/4288/9134/6502/83540/891	6		DOID:12030	panuveitis	5/244	28/7865	0.178571	5.756	4.51083	0.0015104	0.00929351	0.00587207	7097/3106/414062/7124/3383
C0023896	Alcoholic Liver Diseases	6/51	195/21671	0.0307692	13.0745	8.22615	6.31997e-06	0.00053783	0.000373211	124/125/4023/5950/3952/9370	6		C0023817	Hyperlipoproteinemia Type I	4/178	36/21671	0.111111	13.5275	6.84584	0.000211084	0.00434306	0.00309739	8542/348/7293/1071	4		DOID:3069	malignant astrocytoma	7/179	100/7865	0.07	3.0757	3.1878	0.00761244	0.0420636	0.0339016	5426/23492/259266/8208/2146/8140/1869	7		DOID:13406	pulmonary sarcoidosis	6/244	41/7865	0.146341	4.71711	4.26967	0.00151518	0.00929351	0.00587207	64127/7097/100/4914/7124/3162
C2931689	Dystrophia myotonica 2	5/51	118/21671	0.0423729	18.0052	8.9961	8.45244e-06	0.00068505	0.00047537	3240/4023/3952/9370/364	5		C0023896	Alcoholic Liver Diseases	8/178	195/21671	0.0410256	4.99476	5.09943	0.000215547	0.00441281	0.00314713	57817/216/6275/3553/6401/3105/115650/231	8		DOID:2152	ovary epithelial cancer	6/179	77/7865	0.0779221	3.42378	3.26155	0.00796871	0.0431521	0.0347788	5347/259266/898/6790/5888/891	6		DOID:2316	brain ischemia	21/244	333/7865	0.0630631	2.03275	3.44566	0.0015214	0.00929351	0.00587207	3717/1621/6547/2745/54207/3553/355/5243/2100/5742/1514/6401/7124/348/3162/3383/3605/3274/953/4318/2643
C1262211	Diarrhoea predominant irritable bowel syndrome	4/51	57/21671	0.0701754	29.8191	10.5812	9.80049e-06	0.000758201	0.000526131	3240/152831/3952/9370	4		C0748355	Acute respiratory distress	7/178	147/21671	0.047619	5.79749	5.31131	0.000217279	0.00442626	0.00315672	5973/3553/355/3162/3383/7941/7852	7		DOID:289	endometriosis	5/179	55/7865	0.0909091	3.99441	3.40068	0.00800967	0.0431521	0.0347788	5347/2146/1786/1789/332	5		DOID:10964	cholesteatoma of middle ear	4/244	17/7865	0.235294	7.58438	4.86262	0.00156368	0.00947832	0.00598884	7097/7124/3383/4318
C0744483	growth hormone treatment	3/51	20/21671	0.15	63.7382	13.6331	1.3608e-05	0.00088905	0.00061693	3991/4023/9370	3		C0040147	Thyroiditis	6/178	104/21671	0.0576923	7.02388	5.60388	0.000220087	0.00446136	0.00318176	3106/7253/355/6737/3383/7852	6		DOID:263	kidney cancer	13/179	270/7865	0.0481481	2.11556	2.84648	0.00852611	0.0453674	0.0365642	675/7153/1017/5426/6426/898/2146/6790/6502/4436/5111/332/891	13		DOID:3021	acute kidney failure	10/244	106/7865	0.0943396	3.04091	3.78516	0.00160356	0.00964584	0.00609468	4353/154/3553/355/7124/2837/3162/567/3383/26762
C0920563	Insulin Sensitivity	4/51	62/21671	0.0645161	27.4143	10.1159	1.37211e-05	0.00088905	0.00061693	948/3952/9370/2878	4		C0947751	Vascular inflammations	10/178	305/21671	0.0327869	3.99171	4.78849	0.000223729	0.00451296	0.00321855	7253/3553/2048/6401/1118/348/3162/3383/7941/5008	10															DOID:1273	respiratory syncytial virus infectious disease	5/244	29/7865	0.172414	5.55752	4.39937	0.00177955	0.0105435	0.00666186	3135/3568/3383/3605/6439
C3714619	Insulin resistance syndrome	4/51	62/21671	0.0645161	27.4143	10.1159	1.37211e-05	0.00088905	0.00061693	4023/948/3952/9370	4		C0333463	Senile Plaques	9/178	249/21671	0.0361446	4.4005	4.91138	0.00022577	0.00451611	0.0032208	3553/970/28959/348/3162/3383/1071/54209/2358	9		LumA-ceRM7													DOID:9120	amyloidosis	5/244	29/7865	0.172414	5.55752	4.39937	0.00177955	0.0105435	0.00666186	10457/133396/7124/348/567
C2750440	FATTY LIVER DISEASE, NONALCOHOLIC, SUSCEPTIBILITY TO, 1	4/51	63/21671	0.0634921	26.9791	10.0294	1.4626e-05	0.00088905	0.00061693	3240/4023/3952/9370	4		C0030807	Pemphigus	5/178	67/21671	0.0746269	9.08561	6.03218	0.000226085	0.00451611	0.0032208	3135/2048/6891/3105/3107	5		ID	Description	GeneRatio	BgRatio	RichFactor	FoldEnrichment	zScore	pvalue	p.adjust	qvalue	geneID	Count		DOID:326	ischemia	22/244	362/7865	0.0607735	1.95895	3.34228	0.00189136	0.0111223	0.00702758	3717/1621/6547/2745/54207/3553/355/5243/2100/5742/1514/6401/7124/348/3162/3383/3605/3274/953/4318/3990/2643
C2750441	LIVER DISEASE, ALCOHOLIC, SUSCEPTIBILITY TO, 1	4/51	63/21671	0.0634921	26.9791	10.0294	1.4626e-05	0.00088905	0.00061693	3240/4023/3952/9370	4		C0012715	Iron Metabolism Disorders	3/178	15/21671	0.2	24.3494	8.23235	0.000230537	0.00451611	0.0032208	57817/2512/3162	3		DOID:0080326	familial hypertrophic cardiomyopathy	7/170	41/7865	0.170732	7.89885	6.58258	2.35666e-05	0.0140457	0.0127508	91624/4620/2318/57538/4619/4634/5350	7		DOID:11204	allergic conjunctivitis	4/244	18/7865	0.222222	7.16302	4.6837	0.00196197	0.0112849	0.00713031	6356/3566/5320/3383
C3150651	FATTY LIVER DISEASE, NONALCOHOLIC, SUSCEPTIBILITY TO, 2	4/51	63/21671	0.0634921	26.9791	10.0294	1.4626e-05	0.00088905	0.00061693	3240/4023/3952/9370	4		C1853959	Birdshot chorioretinopathy	3/178	15/21671	0.2	24.3494	8.23235	0.000230537	0.00451611	0.0032208	3811/3105/3107	3		DOID:0080006	bone development disease	15/170	228/7865	0.0657895	3.04373	4.65448	0.000116072	0.0345893	0.0314004	4921/2121/5745/7040/633/649/9719/8823/6474/3339/392255/23187/7291/4920/117581	15		DOID:4971	myelofibrosis	4/244	18/7865	0.222222	7.16302	4.6837	0.00196197	0.0112849	0.00713031	2323/2322/3717/10019
C0000889	Acanthosis Nigricans	4/51	64/21671	0.0625	26.5576	9.94488	1.5574e-05	0.000899205	0.000623977	5346/3991/3952/63924	4		C4023560	Generalized periodontitis	3/178	15/21671	0.2	24.3494	8.23235	0.000230537	0.00451611	0.0032208	3106/51314/353345	3		DOID:0080000	muscular disease	21/170	424/7865	0.0495283	2.29141	4.06326	0.000301677	0.0401796	0.0364753	284217/1292/2331/4620/80781/3481/2318/1291/5156/3082/5054/2273/3908/4619/9353/1272/775/1490/5350/9260/6586	21		DOID:841	extrinsic allergic alveolitis	4/244	18/7865	0.222222	7.16302	4.6837	0.00196197	0.0112849	0.00713031	3553/7124/1232/6890
C0854110	Insulin-resistant diabetes mellitus	3/51	21/21671	0.142857	60.7031	13.2943	1.58497e-05	0.000899205	0.000623977	3991/3952/63924	3		C0023290	Leishmaniasis, Visceral	8/178	197/21671	0.0406091	4.94405	5.06069	0.00023101	0.00451611	0.0032208	57817/6036/3135/3553/3162/3107/338339/3663	8		DOID:11446	sciatic neuropathy	10/170	124/7865	0.0806452	3.73102	4.55596	0.000333668	0.0401796	0.0364753	3084/5156/3082/5054/9590/7078/4741/5376/83700/5125	10		DOID:6364	migraine	5/244	30/7865	0.166667	5.37227	4.29298	0.00208223	0.0118899	0.00751256	3363/1621/7124/221692/777
C1257925	Mammary Carcinoma, Animal	5/51	144/21671	0.0347222	14.7542	8.04289	2.21934e-05	0.00121849	0.000845534	2167/4023/5950/140738/50486	5		C1292778	Chronic myeloproliferative disorder	11/178	366/21671	0.0300546	3.65907	4.66896	0.000231567	0.00451611	0.0032208	64805/57817/6275/1844/3553/5777/355/2048/1118/7852/5008	11		DOID:12528	lesion of sciatic nerve	10/170	127/7865	0.0787402	3.64289	4.46281	0.000404492	0.0401796	0.0364753	3084/5156/3082/5054/9590/7078/4741/5376/83700/5125	10		DOID:11335	sarcoidosis	7/244	59/7865	0.118644	3.82433	3.89616	0.00218685	0.0123974	0.00783323	64127/7097/3106/100/4914/7124/3162
C0948242	Nuchal bleb, familial	3/51	24/21671	0.125	53.1152	12.4067	2.40003e-05	0.00126406	0.000877159	4023/3952/9370	3		C0030326	Panniculitis	4/178	37/21671	0.108108	13.1619	6.73788	0.000235161	0.00454314	0.00324008	3553/355/5696/5698	4		DOID:9473	mononeuritis of lower limb	10/170	127/7865	0.0787402	3.64289	4.46281	0.000404492	0.0401796	0.0364753	3084/5156/3082/5054/9590/7078/4741/5376/83700/5125	10		DOID:4989	pancreatitis	9/244	93/7865	0.0967742	3.11938	3.6787	0.00228245	0.0128469	0.00811729	64127/7097/5265/3553/1514/4792/3383/3605/6403
C0024667	Animal Mammary Neoplasms	5/51	147/21671	0.0340136	14.4531	7.94889	2.45089e-05	0.00126406	0.000877159	2167/4023/5950/140738/50486	5		C1328252	Mucocutaneous leishmaniasis	4/178	37/21671	0.108108	13.1619	6.73788	0.000235161	0.00454314	0.00324008	3106/3105/3107/338339	4		DOID:6713	cerebrovascular disease	18/170	348/7865	0.0517241	2.393	3.95058	0.000499009	0.042487	0.03857	781/4323/114904/3481/7040/3084/5156/815/4314/3082/2596/5054/3339/6529/5069/2922/3037/3357	18		DOID:784	chronic kidney disease	14/244	191/7865	0.0732984	2.36267	3.41121	0.0024096	0.0132717	0.00838569	4353/7097/3579/154/344/3553/1286/5243/1285/7124/348/3383/26762/3990
C0149521	Pancreatitis, Chronic	7/51	379/21671	0.0184697	7.84816	6.53238	2.82611e-05	0.00141472	0.0009817	3240/125/4023/5950/1357/3952/9370	7		C0005283	beta Thalassemia	8/178	198/21671	0.040404	4.91908	5.04152	0.000239076	0.00459718	0.00327862	57817/3811/3135/57379/1118/348/567/6362	8		DOID:3627	aortic aneurysm	8/170	89/7865	0.0898876	4.15863	4.45407	0.000644064	0.046785	0.0424718	4837/4323/3685/4314/5054/7078/5592/30008	8		DOID:5200	urinary tract obstruction	7/244	60/7865	0.116667	3.76059	3.84062	0.00241163	0.0132717	0.00838569	6356/3553/7124/567/3383/26762/3663
C0947622	Cholecystolithiasis	5/51	156/21671	0.0320513	13.6193	7.68268	3.25979e-05	0.00158519	0.0011	5950/948/3952/9370/2878	5		C0008497	Choriocarcinoma	12/178	431/21671	0.0278422	3.38971	4.56035	0.000243956	0.0046692	0.00332998	199713/3135/3553/2048/84870/3105/3133/3162/567/3107/8837/7852	12		DOID:1802	mononeuritis	10/170	140/7865	0.0714286	3.30462	4.08937	0.000872212	0.046785	0.0424718	3084/5156/3082/5054/9590/7078/4741/5376/83700/5125	10		DOID:10316	pneumoconiosis	5/244	31/7865	0.16129	5.19897	4.19124	0.00242084	0.0132717	0.00838569	10109/7124/3162/1437/8685
C3160761	Diabetic dyslipidaemia	3/51	28/21671	0.107143	45.5273	11.4507	3.85892e-05	0.00182441	0.001266	4023/948/9370	3		C0008350	Cholelithiasis	9/178	252/21671	0.0357143	4.34811	4.8651	0.000246691	0.00467803	0.00333628	348645/2995/341/3553/3105/348/3162/10062/1071	9		DOID:11984	hypertrophic cardiomyopathy	9/170	116/7865	0.0775862	3.5895	4.17604	0.000876609	0.046785	0.0424718	91624/4620/2318/57538/2273/4619/4634/5350/3357	9		DOID:5327	retinal detachment	4/244	19/7865	0.210526	6.78602	4.51797	0.00242529	0.0132717	0.00838569	3717/355/4914/7124
C0006625	Cachexia	6/51	273/21671	0.021978	9.33894	6.73429	4.23453e-05	0.00194788	0.00135168	5346/3991/4023/3952/9370/1149	6		C0275524	Coinfection	9/178	252/21671	0.0357143	4.34811	4.8651	0.000246691	0.00467803	0.00333628	57817/3106/140691/3135/3553/5696/3162/6890/7852	9		DOID:1188	mononeuropathy	10/170	141/7865	0.070922	3.28118	4.06248	0.000921584	0.046785	0.0424718	3084/5156/3082/5054/9590/7078/4741/5376/83700/5125	10		DOID:6713	cerebrovascular disease	21/244	348/7865	0.0603448	1.94513	3.22679	0.00260341	0.0141482	0.00893949	64127/7097/3106/217/5583/10457/3553/2048/6401/3105/7124/4792/348/3162/567/3383/221692/4321/4318/1071/2643
C0020615	Hypoglycemia	7/51	420/21671	0.0166667	7.08203	6.11322	5.42043e-05	0.00242778	0.00168469	3991/5105/4023/948/3952/9370/364	7		C0235782	Gallbladder Carcinoma	13/178	498/21671	0.0261044	3.17814	4.47507	0.000252039	0.00475753	0.00339297	216/5660/3106/2014/355/2048/3105/567/3107/8837/7852/6362/1071	13		DOID:3454	brain infarction	14/170	249/7865	0.0562249	2.60123	3.8162	0.000962502	0.046785	0.0424718	781/4323/114904/3481/7040/3084/5156/815/3082/2596/5054/6529/3037/3357	14		DOID:5844	myocardial infarction	21/244	350/7865	0.06	1.93402	3.19841	0.0027878	0.0150465	0.00950706	4625/3717/217/3566/154/3553/2688/90865/7124/4792/2837/348/3162/3383/1232/1437/221692/3605/4318/2643/6403
C0598428	genetic hypertension	3/51	34/21671	0.0882353	37.4931	10.3428	6.97894e-05	0.00304568	0.00211346	4023/948/9370	3		C0013990	Pathological accumulation of air in tissues	5/178	69/21671	0.0724638	8.82226	5.92244	0.000259638	0.00487859	0.00347931	6891/115650/348/6890/6892	5		DOID:423	myopathy	18/170	372/7865	0.0483871	2.23861	3.63766	0.00108688	0.046785	0.0424718	284217/1292/2331/4620/80781/2318/1291/3082/5054/2273/3908/4619/9353/1272/775/1490/5350/9260	18		DOID:1184	nephrotic syndrome	9/244	96/7865	0.09375	3.0219	3.56635	0.0028394	0.0152207	0.00961716	6356/344/3553/1514/4792/348/3605/3990/30011
C0205699	Carcinomatosis	5/51	186/21671	0.0268817	11.4226	6.9335	7.52803e-05	0.00316346	0.00219519	2167/4023/5950/140738/50486	5		C0745103	Hyperlipoproteinemia Type IIa	8/178	201/21671	0.039801	4.84566	4.98475	0.00026467	0.00495053	0.00353062	3553/6401/8542/348/3383/7941/3107/1071	8		DOID:520	aortic disease	8/170	98/7865	0.0816327	3.77671	4.11111	0.00121774	0.046785	0.0424718	4837/4323/3685/4314/5054/7078/5592/30008	8		DOID:2378	relapsing-remitting multiple sclerosis	4/244	20/7865	0.2	6.44672	4.3638	0.00295866	0.0155063	0.00979757	64127/355/26762/4318
C4237343	Overweight or obesity	3/51	35/21671	0.0857143	36.4218	10.186	7.62056e-05	0.00316346	0.00219519	3240/3952/9370	3		C0018939	Hematological Disease	9/178	255/21671	0.0352941	4.29696	4.81954	0.000269196	0.00498513	0.0035553	57817/274/3553/355/6737/3133/3162/3383/7852	9		DOID:1934	dysostosis	6/170	56/7865	0.107143	4.95693	4.41669	0.00123871	0.046785	0.0424718	2121/8823/392255/7291/4920/117581	6		DOID:4029	gastritis	4/244	20/7865	0.2	6.44672	4.3638	0.00295866	0.0155063	0.00979757	3717/64127/7124/4792
C0240225	Liver mass	3/51	36/21671	0.0833333	35.4101	10.0357	8.29956e-05	0.0033633	0.00233386	4023/3952/9370	3		C0263361	Psoriasis vulgaris	9/178	255/21671	0.0352941	4.29696	4.81954	0.000269196	0.00498513	0.0035553	5660/3106/3811/3553/3105/348/3162/3107/6890	9		DOID:10273	heart conduction disease	9/170	122/7865	0.0737705	3.41297	3.99226	0.00125597	0.046785	0.0424718	6327/7040/815/4314/3082/9353/2702/775/4311	9		DOID:9360	intrinsic asthma	4/244	20/7865	0.2	6.44672	4.3638	0.00295866	0.0155063	0.00979757	3106/6891/3133/1232
C0028949	Oligomenorrhea	3/51	37/21671	0.0810811	34.4531	9.89135	9.01691e-05	0.00356902	0.00247661	5346/3991/63924	3		C3665419	intracranial glioma	6/178	108/21671	0.0555556	6.76373	5.46452	0.000270154	0.00498513	0.0035553	3134/2323/355/1285/7293/6362	6															DOID:2473	opportunistic mycosis	8/244	79/7865	0.101266	3.26416	3.61888	0.00298355	0.0155063	0.00979757	10333/64744/2512/90865/7096/1437/3087/51267
C0020473	Hyperlipidemia	7/51	472/21671	0.0148305	6.3018	5.65618	0.000112448	0.0043497	0.00301835	3240/4023/152831/948/3952/9370/364	7		C0034068	Pulmonary Eosinophilia	5/178	70/21671	0.0714286	8.69623	5.86923	0.000277769	0.00510276	0.00363919	64805/6036/3553/27181/3162	5		LumA-ceRM8
C0520679	Sleep Apnea, Obstructive	7/51	480/21671	0.0145833	6.19677	5.59198	0.000124785	0.00471966	0.00327507	2167/3240/4023/948/2819/3952/9370	7		C0333291	Bleeding ulcer	3/178	16/21671	0.1875	22.8276	7.94836	0.000282027	0.00513515	0.00366228	340061/3553/5742	3		ID	Description	GeneRatio	BgRatio	RichFactor	FoldEnrichment	zScore	pvalue	p.adjust	qvalue	geneID	Count
C1961112	Heart Decompensation	4/51	113/21671	0.0353982	15.0415	7.26832	0.000144984	0.00536441	0.00372247	5105/5950/9370/1149	4		C2004461	Bowel dysfunction	3/178	16/21671	0.1875	22.8276	7.94836	0.000282027	0.00513515	0.00366228	231/567/151306	3		/	/	/	/	/	/	/	/	/	/	/	/
C0205697	Carcinoma, Spindle-Cell	5/51	218/21671	0.0229358	9.74591	6.30341	0.000158611	0.00574376	0.00398571	2167/4023/5950/140738/50486	5		C0854193	Cognitive deterioration	4/178	39/21671	0.102564	12.4869	6.53397	0.000289144	0.00524153	0.00373815	3553/355/348/3383	4
C0577631	Carotid Atherosclerosis	5/51	219/21671	0.0228311	9.70141	6.28585	0.000162031	0.00574535	0.00398681	2167/3240/948/3952/9370	5		C0011616	Contact Dermatitis	6/178	110/21671	0.0545455	6.64076	5.39747	0.000298331	0.00533754	0.00380663	3553/2048/970/3162/3107/5008	6		LumA-ceRM9
C1843057	Calf muscle hypertrophy	3/51	46/21671	0.0652174	27.7123	8.80843	0.000173551	0.00602369	0.00417996	5346/3679/63924	3		C0041948	Uremia	6/178	110/21671	0.0545455	6.64076	5.39747	0.000298331	0.00533754	0.00380663	355/348/3162/567/3383/7941	6		ID	Description	GeneRatio	BgRatio	RichFactor	FoldEnrichment	zScore	pvalue	p.adjust	qvalue	geneID	Count
C1959583	Myocardial Failure	4/51	119/21671	0.0336134	14.2831	7.05692	0.000176959	0.00602369	0.00417996	5105/5950/9370/1149	4		C1842937	AURAL ATRESIA, CONGENITAL	6/178	110/21671	0.0545455	6.64076	5.39747	0.000298331	0.00533754	0.00380663	64805/10911/3106/3553/3133/348	6		DOID:1339	Diamond-Blackfan anemia	20/54	27/7865	0.740741	107.888	46.2564	8.42419e-40	1.06145e-37	1.01977e-37	6229/6155/6210/6218/6224/11224/6125/6141/6135/6234/6201/6204/6154/6223/3921/6165/6232/6231/6235/6138	20
C0745130	Resistant hypertensive disorder	3/51	47/21671	0.0638298	27.1227	8.70733	0.000185077	0.0061765	0.004286	3240/3952/9370	3		C1861172	Venous Thromboembolism	11/178	378/21671	0.0291005	3.54291	4.53888	0.000304926	0.0054319	0.00387392	285286/64805/57817/5453/2512/6737/6401/26301/3162/5336/1071	11		DOID:1340	pure red-cell aplasia	20/54	30/7865	0.666667	97.0988	43.8454	2.81501e-38	1.77345e-36	1.70382e-36	6229/6155/6210/6218/6224/11224/6125/6141/6135/6234/6201/6204/6154/6223/3921/6165/6232/6231/6235/6138	20
C0023212	Left-Sided Heart Failure	4/51	123/21671	0.0325203	13.8186	6.9243	0.000200922	0.00655501	0.00454865	5105/5950/9370/1149	4		C3841475	beta^+^ Thalassemia	7/178	156/21671	0.0448718	5.46301	5.09109	0.000312308	0.00553243	0.00394562	57817/3135/57379/1118/348/567/6362	7		DOID:1342	congenital hypoplastic anemia	20/54	61/7865	0.327869	47.7535	30.4779	5.13826e-30	2.15807e-28	2.07333e-28	6229/6155/6210/6218/6224/11224/6125/6141/6135/6234/6201/6204/6154/6223/3921/6165/6232/6231/6235/6138	20
C0020476	Hyperlipoproteinemias	3/51	49/21671	0.0612245	26.0156	8.51428	0.000209595	0.00655501	0.00454865	4023/3952/9370	3		C1402315	Vascular lesions	6/178	111/21671	0.0540541	6.58093	5.36457	0.000313258	0.00553243	0.00394562	3106/5973/3811/3553/3105/348	6		DOID:12449	aplastic anemia	20/54	77/7865	0.25974	37.8307	27.0027	1.13505e-27	3.5754e-26	3.43501e-26	6229/6155/6210/6218/6224/11224/6125/6141/6135/6234/6201/6204/6154/6223/3921/6165/6232/6231/6235/6138	20
C0221032	Familial generalized lipodystrophy	3/51	49/21671	0.0612245	26.0156	8.51428	0.000209595	0.00655501	0.00454865	5346/3952/9370	3		C1704436	Peripheral Arterial Diseases	10/178	319/21671	0.031348	3.81653	4.61191	0.000319782	0.00562351	0.00401058	64805/3553/2048/5742/348/3162/567/7941/85315/730249	10		DOID:720	normocytic anemia	20/54	116/7865	0.172414	25.1117	21.7521	9.2132e-24	2.32173e-22	2.23056e-22	6229/6155/6210/6218/6224/11224/6125/6141/6135/6234/6201/6204/6154/6223/3921/6165/6232/6231/6235/6138	20
C0205696	Anaplastic carcinoma	5/51	232/21671	0.0215517	9.15779	6.06738	0.000211825	0.00655501	0.00454865	2167/4023/5950/140738/50486	5		C0040558	Toxoplasmosis	6/178	112/21671	0.0535714	6.52217	5.33207	0.000328764	0.00575687	0.00410569	340061/3553/6737/3105/3383/3107	6		DOID:2355	anemia	20/54	187/7865	0.106952	15.5773	16.7741	1.90601e-19	4.00261e-18	3.84545e-18	6229/6155/6210/6218/6224/11224/6125/6141/6135/6234/6201/6204/6154/6223/3921/6165/6232/6231/6235/6138	20
C0409959	Osteoarthritis, Knee	6/51	368/21671	0.0163043	6.92807	5.57062	0.000217581	0.00661292	0.00458884	10216/5346/2167/948/3952/9370	6		C0018133	Graft-vs-Host Disease	12/178	447/21671	0.0268456	3.26838	4.41009	0.000339306	0.00578817	0.00412801	216/3106/23526/3811/3135/3553/3804/3105/970/3133/3383/3107	12		DOID:74	hematopoietic system disease	21/54	349/7865	0.0601719	8.76393	12.3358	2.93006e-15	5.2741e-14	5.06702e-14	6229/6155/6210/6218/84343/6224/11224/6125/6141/6135/6234/6201/6204/6154/6223/3921/6165/6232/6231/6235/6138	21
C0013264	Muscular Dystrophy, Duchenne	6/51	375/21671	0.016	6.79875	5.50158	0.00024079	0.0069644	0.00483274	3240/3679/3952/9370/7079/2878	6		C0342158	Hypothyroidism, Autoimmune	3/178	17/21671	0.176471	21.4848	7.68914	0.000340398	0.00578817	0.00412801	2323/7253/5698	3		DOID:0060036	intrinsic cardiomyopathy	11/54	362/7865	0.0303867	4.42577	5.54831	2.70943e-05	0.000426735	0.000409979	6210/6218/6176/6207/6157/6125/1915/3921/6188/6189/6193	11
C0038187	Starvation	2/51	10/21671	0.2	84.9843	12.9017	0.000241422	0.0069644	0.00483274	3240/3952	2		C0751340	Myasthenia Gravis, Ocular	3/178	17/21671	0.176471	21.4848	7.68914	0.000340398	0.00578817	0.00412801	3106/355/3105	3		DOID:0050700	cardiomyopathy	11/54	447/7865	0.0246085	3.58418	4.67734	0.000182756	0.00255859	0.00245813	6210/6218/6176/6207/6157/6125/1915/3921/6188/6189/6193	11
C4505390	Heroin Smoking	2/51	10/21671	0.2	84.9843	12.9017	0.000241422	0.0069644	0.00483274	3952/9370	2		C0854211	Bacterial keratitis	3/178	17/21671	0.176471	21.4848	7.68914	0.000340398	0.00578817	0.00412801	7114/3553/2358	3		DOID:5603	T-cell acute lymphoblastic leukemia	3/54	31/7865	0.0967742	14.095	6.07378	0.00120047	0.0151259	0.0145319	6134/6125/6135	3
C0013537	Eclampsia	5/51	241/21671	0.0207469	8.8158	5.92594	0.000252598	0.00716537	0.0049722	2167/4023/5950/3952/9370	5		C0877635	Cytomegalovirus viremia	3/178	17/21671	0.176471	21.4848	7.68914	0.000340398	0.00578817	0.00412801	3811/3804/5696	3
C0494463	Alzheimer Disease, Late Onset	6/51	385/21671	0.0155844	6.62215	5.40596	0.000277289	0.00768225	0.00533087	5346/5105/4023/5950/3952/9370	6		C1332210	Adult Nodular Lymphocyte Predominant Hodgkin Lymphoma	3/178	17/21671	0.176471	21.4848	7.68914	0.000340398	0.00578817	0.00412801	1844/57379/8837	3
C1257763	Overnutrition	3/51	54/21671	0.0555556	23.6068	8.07838	0.000279847	0.00768225	0.00533087	4023/948/3952	3		C1332985	Childhood Nodular Lymphocyte Predominant Hodgkin Lymphoma	3/178	17/21671	0.176471	21.4848	7.68914	0.000340398	0.00578817	0.00412801	1844/57379/8837	3
C3658248	Hypertriglyceridemic Waist	2/51	11/21671	0.181818	77.2585	12.2869	0.000294626	0.00783522	0.00543702	2167/9370	2		C0242647	Mucosa-Associated Lymphoid Tissue Lymphoma	9/178	264/21671	0.0340909	4.15047	4.68695	0.000347158	0.00587883	0.00419267	3135/5777/355/5742/57379/115650/1118/3383/7852	9
C4054476	Monogenic Obesity	2/51	11/21671	0.181818	77.2585	12.2869	0.000294626	0.00783522	0.00543702	3952/9370	2		C0751633	Carotid Artery Plaque	4/178	41/21671	0.097561	11.8778	6.34446	0.000351482	0.00592765	0.00422748	64805/348/7941/7852	4
C0008350	Cholelithiasis	5/51	252/21671	0.0198413	8.43098	5.7628	0.000310251	0.00812381	0.00563728	5950/948/3952/9370/2878	5		C1290886	Chronic inflammatory disorder	5/178	74/21671	0.0675676	8.22616	5.66654	0.000360064	0.00602385	0.00429609	57817/3106/3553/5777/6401	5
C4703473	Atherosclerotic lesion	5/51	253/21671	0.0197628	8.39766	5.74846	0.000315948	0.00814764	0.00565381	10216/2167/4023/948/9370	5		C0002171	Alopecia Areata	6/178	114/21671	0.0526316	6.40775	5.26824	0.000361578	0.00602385	0.00429609	3135/3553/355/3383/3107/6890	6
C0856151	Fat redistribution	2/51	12/21671	0.166667	70.8203	11.75	0.00035302	0.00855959	0.00593968	5950/948	2		C0019340	Herpes NOS	6/178	114/21671	0.0526316	6.40775	5.26824	0.000361578	0.00602385	0.00429609	3106/3105/348/3162/3383/3107	6
C2242482	Exacerbation of idiopathic pulmonary fibrosis	2/51	12/21671	0.166667	70.8203	11.75	0.00035302	0.00855959	0.00593968	3952/9370	2		C0339143	Thyroid associated opthalmopathies	8/178	211/21671	0.0379147	4.61601	4.80338	0.00036668	0.0060743	0.00433207	3106/6275/7253/3553/6401/3105/3383/3107	8
C0149721	Left Ventricular Hypertrophy	6/51	403/21671	0.0148883	6.32638	5.24213	0.000353862	0.00855959	0.00593968	2167/4023/948/3952/9370/7079	6		C0019159	Hepatitis A	12/178	451/21671	0.0266075	3.23939	4.37358	0.000367558	0.0060743	0.00433207	2323/6275/3135/3553/355/6737/3105/348/7293/567/3107/54209	12
C0278608	Adult Liposarcoma	4/51	143/21671	0.027972	11.8859	6.34334	0.000357069	0.00855959	0.00593968	5346/3952/7079/50486	4		C4049702	Focal Segmental Glomerulosclerosis, Not Otherwise Specified	4/178	42/21671	0.0952381	11.595	6.25457	0.000386006	0.00635366	0.0045313	2048/3105/8542/7852	4
C0279984	Childhood Liposarcoma	4/51	143/21671	0.027972	11.8859	6.34334	0.000357069	0.00855959	0.00593968	5346/3952/7079/50486	4		C0022876	Premature Obstetric Labor	3/178	18/21671	0.166667	20.2912	7.45122	0.000406016	0.00657649	0.00469022	3553/6401/3383	3
C0017667	Nodular glomerulosclerosis	3/51	59/21671	0.0508475	21.6062	7.69773	0.000363753	0.00859871	0.00596682	2167/948/9370	3		C0376300	Dengue Shock Syndrome	3/178	18/21671	0.166667	20.2912	7.45122	0.000406016	0.00657649	0.00469022	23601/3553/3105	3
C1134719	Invasive Ductal Breast Carcinoma	6/51	414/21671	0.0144928	6.15828	5.14685	0.000408251	0.00932913	0.00647367	80760/130399/2167/125/152831/2878	6		C0685889	Splenic Hypoplasia	3/178	18/21671	0.166667	20.2912	7.45122	0.000406016	0.00657649	0.00469022	3553/6401/3383	3
C0085662	Macrocytosis	2/51	13/21671	0.153846	65.3725	11.2759	0.000416577	0.00932913	0.00647367	3240/125	2		C0018378	Guillain-Barre Syndrome	7/178	163/21671	0.0429448	5.22841	4.9313	0.000407191	0.00657649	0.00469022	3553/355/2048/5742/348/3383/7852	7
C0405581	Testicular dysfunction	2/51	13/21671	0.153846	65.3725	11.2759	0.000416577	0.00932913	0.00647367	3952/9370	2		C0085253	Adult-Onset Still Disease	5/178	76/21671	0.0657895	8.00968	5.57083	0.000407535	0.00657649	0.00469022	3553/355/3162/3383/7852	5
C2609247	Adrenal incidentaloma	2/51	13/21671	0.153846	65.3725	11.2759	0.000416577	0.00932913	0.00647367	3952/9370	2		C0238461	Anaplastic thyroid carcinoma	11/178	392/21671	0.0280612	3.41638	4.39362	0.000414397	0.00666111	0.00475057	10866/216/6275/7253/355/2048/970/3640/348/3383/7852	11
C0011880	Diabetic Ketoacidosis	3/51	63/21671	0.047619	20.2344	7.42553	0.000441405	0.00975677	0.00677042	3952/7079/50486	3		C0007867	Cervix Diseases	4/178	43/21671	0.0930233	11.3253	6.16766	0.000422887	0.006693	0.00477331	3106/7253/3811/3107	4
C0085083	Ovarian Hyperstimulation Syndrome	3/51	64/21671	0.046875	19.9182	7.36138	0.000462348	0.0100887	0.00700073	3240/4023/3952	3		C0032302	Mycoplasma pneumonia	4/178	43/21671	0.0930233	11.3253	6.16766	0.000422887	0.006693	0.00477331	23601/3553/6401/115650	4
C0235527	Heart Failure, Right-Sided	4/51	154/21671	0.025974	11.0369	6.07095	0.000472672	0.0101834	0.00706646	5105/5950/9370/1149	4		C0235896	Pulmonary Infiltrate	4/178	43/21671	0.0930233	11.3253	6.16766	0.000422887	0.006693	0.00477331	3106/355/348/3663	4
C0277919	Postthrombotic Syndrome	2/51	14/21671	0.142857	60.7031	10.853	0.000485275	0.0101968	0.00707574	3952/9370	2		C0343055	Generalized pustular psoriasis	4/178	43/21671	0.0930233	11.3253	6.16766	0.000422887	0.006693	0.00477331	3553/3105/348/3107	4
C4551632	Recurrent pancreatitis	2/51	14/21671	0.142857	60.7031	10.853	0.000485275	0.0101968	0.00707574	4023/1357	2		C0006271	Bronchiolitis	6/178	118/21671	0.0508475	6.19054	5.14506	0.000434863	0.00685617	0.00488969	6036/6891/3383/6890/5336/6892	6
C0524910	Hepatitis C, Chronic	6/51	430/21671	0.0139535	5.92914	5.01423	0.000498824	0.0103536	0.00718461	3240/4023/5950/948/3952/9370	6		C0028960	Oligospermia	8/178	217/21671	0.0368664	4.48838	4.69991	0.000441896	0.00694046	0.0049498	3106/221400/355/57379/3105/3640/3162/3107	8
C0205698	Undifferentiated carcinoma	5/51	283/21671	0.0176678	7.50745	5.35187	0.00052699	0.010718	0.00743742	2167/4023/5950/140738/50486	5		C4277682	Chemical and Drug Induced Liver Injury	12/178	461/21671	0.0260304	3.16912	4.28406	0.000447036	0.0069945	0.00498834	10866/101/57817/3106/2512/3553/355/3105/348/3162/10062/7850	12
C0236663	Alcohol withdrawal syndrome	3/51	67/21671	0.0447761	19.0263	7.17736	0.000528971	0.010718	0.00743742	125/3952/9370	3		C0085409	Polyendocrinopathies, Autoimmune	7/178	166/21671	0.0421687	5.13392	4.86561	0.000454326	0.00702124	0.00500741	3106/7253/5742/6401/3105/3383/3663	7
C0027858	Neuroma	2/51	15/21671	0.133333	56.6562	10.4727	0.00055909	0.011195	0.00776841	3952/9370	2		C0014057	Japanese Encephalitis	6/178	119/21671	0.0504202	6.13851	5.11515	0.000454877	0.00702124	0.00500741	23601/340061/3553/2048/57379/3383	6
C0085580	Essential Hypertension	6/51	445/21671	0.0134831	5.72928	4.89584	0.00059732	0.0117663	0.00816489	3240/4023/948/3952/9370/2878	6		C1851585	MYELOPROLIFERATIVE DISORDER, CHRONIC, WITH EOSINOPHILIA	6/178	119/21671	0.0504202	6.13851	5.11515	0.000454877	0.00702124	0.00500741	3106/3553/3105/348/3383/7852	6
C0020175	Hunger	3/51	70/21671	0.0428571	18.2109	7.00492	0.000601451	0.0117663	0.00816489	948/3952/9370	3		C1861453	Pseudohyperkalemia Cardiff	8/178	218/21671	0.0366972	4.46779	4.68304	0.00045557	0.00702124	0.00500741	57817/3106/3811/57379/3105/348/3107/6892	8
C0032914	Pre-Eclampsia	4/51	166/21671	0.0240964	10.2391	5.80363	0.000626832	0.0119327	0.00828033	2167/3240/3952/9370	4		C0042029	Urinary tract infection	8/178	219/21671	0.0365297	4.44739	4.66626	0.000469586	0.00720462	0.00513819	57817/5453/3553/5742/6401/3383/7852/6362	8
C1704330	Dental Diseases	2/51	16/21671	0.125	53.1152	10.1282	0.000637999	0.0119327	0.00828033	3952/9370	2		C0020541	Portal Hypertension	7/178	167/21671	0.0419162	5.10318	4.84406	0.00047097	0.00720462	0.00513819	10911/3553/5742/22846/3162/3663/151306	7
C2675519	Hypoadiponectinemia	2/51	16/21671	0.125	53.1152	10.1282	0.000637999	0.0119327	0.00828033	100874095/9370	2		C0010232	Cowpox	3/178	19/21671	0.157895	19.2232	7.23177	0.00047924	0.00725026	0.00517074	340061/3553/6890	3
C4054325	Obesity Related Glomerulopathy	2/51	16/21671	0.125	53.1152	10.1282	0.000637999	0.0119327	0.00828033	948/3952	2		C1512508	Human herpesvirus 8 infection	3/178	19/21671	0.157895	19.2232	7.23177	0.00047924	0.00725026	0.00517074	3384/3811/7293	3
C3714796	Isolated somatotropin deficiency	4/51	168/21671	0.0238095	10.1172	5.76172	0.00065561	0.0121288	0.00841641	3240/4023/3952/9370	4		C3495436	American cutaneous leishmaniasis	3/178	19/21671	0.157895	19.2232	7.23177	0.00047924	0.00725026	0.00517074	3106/3105/3107	3
C2751492	AMYLOIDOSIS, HEREDITARY, TRANSTHYRETIN-RELATED	3/51	74/21671	0.0405405	17.2266	6.79097	0.000707551	0.0129109	0.00895913	5950/5959/64102	3		C0086445	Idiopathic Membranous Glomerulonephritis	5/178	79/21671	0.0632911	7.70552	5.43363	0.000487409	0.00733038	0.00522788	3106/3105/8542/231/3107	5
C0854706	Neonatal infection	2/51	17/21671	0.117647	49.9908	9.81423	0.000721978	0.0129109	0.00895913	3952/9370	2		C0042109	Urticaria	7/178	168/21671	0.0416667	5.0728	4.82269	0.000488098	0.00733038	0.00522788	3106/3553/355/6401/3162/3383/5336	7
C1834674	BETHLEM MYOPATHY 1	2/51	17/21671	0.117647	49.9908	9.81423	0.000721978	0.0129109	0.00895913	3952/9370	2		C0376618	Endotoxemia	11/178	401/21671	0.0274314	3.3397	4.30367	0.000500885	0.00746149	0.00532139	53831/3553/5777/355/6401/4624/3162/3383/7941/730249/7852	11
C1301700	Cardiovascular morbidity	3/51	75/21671	0.04	16.9969	6.74009	0.000735815	0.0129109	0.00895913	2167/3952/9370	3		C0021368	Inflammation	12/178	467/21671	0.0256959	3.12841	4.23151	0.000501353	0.00746149	0.00532139	2323/57817/274/7114/3553/355/6401/115650/3162/3383/6362/2358	12
C1333177	Lymphoproliferative Disorder of the Skin	3/51	75/21671	0.04	16.9969	6.74009	0.000735815	0.0129109	0.00895913	125/5950/9370	3		C0001849	AIDS Dementia Complex	4/178	45/21671	0.0888889	10.822	6.00216	0.000504081	0.00746149	0.00532139	3553/348/3107/7852	4
C4317112	Generalized Lipodystrophy	2/51	18/21671	0.111111	47.2135	9.52649	0.000811003	0.0139427	0.00967513	5346/3952	2		C0751324	Multiple Sclerosis, Acute Fulminating	4/178	45/21671	0.0888889	10.822	6.00216	0.000504081	0.00746149	0.00532139	3553/6401/348/3383	4
C4317171	Adolescent Obesity	2/51	18/21671	0.111111	47.2135	9.52649	0.000811003	0.0139427	0.00967513	3952/9370	2		C0039128	Syphilis	5/178	80/21671	0.0625	7.6092	5.3895	0.000516485	0.0076177	0.00543279	2995/3811/3804/3105/3107	5
C4551584	Brain atrophy	4/51	182/21671	0.021978	9.33894	5.48687	0.000883915	0.0150442	0.0104395	5105/125/9370/7079	4		C0002893	Refractory anemias	10/178	340/21671	0.0294118	3.5808	4.36495	0.000526834	0.00774257	0.00552185	57817/216/6275/3553/355/2048/6737/348/3107/7852	10
C1704436	Peripheral Arterial Diseases	5/51	319/21671	0.015674	6.66021	4.94647	0.000903669	0.015102	0.0104796	2167/4023/948/3952/9370	5		C0206693	Medullary carcinoma	5/178	81/21671	0.0617284	7.51526	5.34612	0.000546847	0.00797969	0.00569096	7471/7253/5777/5742/3383	5
C0021832	Intestinal Diseases, Parasitic	2/51	19/21671	0.105263	44.7286	9.26147	0.000905052	0.015102	0.0104796	3952/9370	2		C3267073	Autoinflammatory disease	5/178	81/21671	0.0617284	7.51526	5.34612	0.000546847	0.00797969	0.00569096	340061/3553/5777/5696/5336	5
C0020443	Hypercholesterolemia	6/51	489/21671	0.0122699	5.21376	4.57749	0.000975424	0.0161182	0.0111847	3240/4023/948/2819/3952/9370	6		C0031736	Polymorphous light eruption	3/178	20/21671	0.15	18.2621	7.02846	0.000560417	0.00812012	0.00579111	3553/3383/3107	3
C3469186	HEMOCHROMATOSIS, TYPE 1	3/51	83/21671	0.0361446	15.3586	6.36549	0.000988065	0.0161225	0.0111877	3240/9370/64102	3		C0473527	Hypoalphalipoproteinemias	3/178	20/21671	0.15	18.2621	7.02846	0.000560417	0.00812012	0.00579111	348/5360/1071	3
C0009782	Connective Tissue Diseases	4/51	188/21671	0.0212766	9.04088	5.37801	0.000997066	0.0161225	0.0111877	3240/3952/9370/64102	4		C1367654	Marginal Zone B-Cell Lymphoma	6/178	124/21671	0.0483871	5.89099	4.97056	0.000565963	0.00817171	0.0058279	3106/3135/355/57379/3383/7852	6
C0855228	Eating disorder symptom	2/51	20/21671	0.1	42.4922	9.01631	0.0010041	0.0161225	0.0111877	3952/9370	2		C0023787	Lipodystrophy	8/178	226/21671	0.0353982	4.30964	4.55158	0.000577806	0.00829494	0.00591579	3106/3553/5777/355/4624/5696/348/5698	8
C0033046	Premenstrual syndrome	2/51	21/21671	0.0952381	40.4687	8.78862	0.00110813	0.0169913	0.0117906	3240/3952	2		C0032231	Pleurisy	5/178	82/21671	0.0609756	7.42361	5.30348	0.000578529	0.00829494	0.00591579	3106/3553/355/3162/3383	5
C0085399	Ehrlichiosis	2/51	21/21671	0.0952381	40.4687	8.78862	0.00110813	0.0169913	0.0117906	3240/5950	2		C0042571	Vertigo	7/178	173/21671	0.0404624	4.92619	4.7183	0.000581338	0.00830627	0.00592387	3106/27010/3553/355/64859/348/567	7
C0342335	insulin resistance in diabetes	2/51	21/21671	0.0952381	40.4687	8.78862	0.00110813	0.0169913	0.0117906	3952/9370	2		C0023484	Leukemia, Plasma Cell	4/178	47/21671	0.0851064	10.3615	5.84676	0.000595794	0.00848336	0.00605017	7114/3105/3383/7852	4
C1399793	skin fold (abnormality)	2/51	21/21671	0.0952381	40.4687	8.78862	0.00110813	0.0169913	0.0117906	948/9370	2		C0027059	Myocarditis	9/178	285/21671	0.0315789	3.84465	4.39923	0.000603418	0.00856229	0.00610646	7471/140691/3553/355/2048/6737/4624/3162/3663	9
C1504532	Post transplant diabetes mellitus	2/51	21/21671	0.0952381	40.4687	8.78862	0.00110813	0.0169913	0.0117906	3952/9370	2		C0949658	Cardiomyopathy, Hypertrophic, Familial	5/178	83/21671	0.060241	7.33417	5.26155	0.00061157	0.00862011	0.0061477	1769/4624/165904/3383/3107	5
C0341439	Chronic liver disease	4/51	196/21671	0.0204082	8.67187	5.24022	0.00116332	0.017628	0.0122324	2167/125/5950/9370	4		C0018790	Cardiac Arrest	11/178	411/21671	0.026764	3.25844	4.20667	0.000614224	0.00862011	0.0061477	388011/3106/7114/3553/5742/6401/3105/348/3162/3383/3107	11
C0279565	Invasive Lobular Breast Carcinoma	3/51	88/21671	0.0340909	14.486	6.15679	0.00117036	0.017628	0.0122324	5346/3991/2167	3		C0008312	Primary biliary cirrhosis	12/178	478/21671	0.0251046	3.05641	4.13732	0.000615434	0.00862011	0.0061477	57817/3106/3553/355/6737/3105/348/3162/3383/283234/3663/151306	12
C0154208	Disorder of endocrine ovary	2/51	22/21671	0.0909091	38.6292	8.57639	0.00121711	0.0180132	0.0124997	3952/9370	2		C0023891	Liver Cirrhosis, Alcoholic	6/178	126/21671	0.047619	5.79749	4.91492	0.000615872	0.00862011	0.0061477	3106/3553/355/6401/3105/348	6
C0600241	heroin abuse	2/51	22/21671	0.0909091	38.6292	8.57639	0.00121711	0.0180132	0.0124997	3952/9370	2		C4290046	trachomatis	7/178	175/21671	0.04	4.86989	4.67767	0.000622378	0.00868165	0.00619158	340061/3553/2048/3105/348/567/6362	7
C0023827	liposarcoma	4/51	200/21671	0.02	8.49843	5.17423	0.00125333	0.0183894	0.0127608	5346/3952/7079/50486	4		C0003130	Anoxia	9/178	287/21671	0.0313589	3.81786	4.37327	0.0006343	0.00881806	0.00628886	3135/3553/355/56659/348/3162/3383/8837/7852	9
C1956089	Osteophyte	3/51	91/21671	0.032967	14.0084	6.03957	0.00128927	0.018755	0.0130144	10216/125/3952	3		C0040021	Thromboangiitis Obliterans	6/178	127/21671	0.0472441	5.75184	4.88755	0.000642073	0.00885521	0.00631536	3106/7253/3553/6401/3105/3383	6
C0342881	Familial hypercholesterolemia - homozygous	2/51	23/21671	0.0869565	36.9497	8.37794	0.00133102	0.0191983	0.0133221	124/4023	2		C1262091	Lymphocytic infiltration	5/178	84/21671	0.0595238	7.24686	5.22031	0.000646005	0.00885521	0.00631536	3106/7253/3811/7852/6362	5
C0018995	Hemochromatosis	3/51	93/21671	0.0322581	13.7071	5.96445	0.00137261	0.0196317	0.0136229	3240/9370/64102	3		C4521256	Glomerulopathy Assessment	5/178	84/21671	0.0595238	7.24686	5.22031	0.000646005	0.00885521	0.00631536	3106/355/1286/1285/348	5
C0001144	Acne Vulgaris	3/51	94/21671	0.0319149	13.5613	5.92776	0.00141552	0.0199108	0.0138165	4023/3952/9370	3		C0268380	Systemic amyloidosis	3/178	21/21671	0.142857	17.3925	6.83936	0.000649884	0.00885521	0.00631536	6737/348/567	3
C0020598	Hypocalcemia	3/51	94/21671	0.0319149	13.5613	5.92776	0.00141552	0.0199108	0.0138165	124/125/948	3		C0339985	Idiopathic bronchiectasis	3/178	21/21671	0.142857	17.3925	6.83936	0.000649884	0.00885521	0.00631536	6891/3107/6890	3
C0598784	Dyslipoproteinemias	2/51	24/21671	0.0833333	35.4101	8.19181	0.00144984	0.0200296	0.0138989	3240/4023	2		C0752355	Myotonia Fluctuans (disorder)	3/178	21/21671	0.142857	17.3925	6.83936	0.000649884	0.00885521	0.00631536	7471/3553/7852	3
C0154251	Lipid Metabolism Disorders	3/51	95/21671	0.0315789	13.4186	5.89162	0.00145926	0.0200296	0.0138989	4023/3952/9370	3		C0333516	Tumor necrosis	10/178	350/21671	0.0285714	3.47849	4.25411	0.000658902	0.00891902	0.00636087	2323/6275/3553/355/3133/348/3383/7941/7852/5008	10
C0205824	Liposarcoma, Dedifferentiated	3/51	95/21671	0.0315789	13.4186	5.89162	0.00145926	0.0200296	0.0138989	5346/948/7079	3		C1868683	B-CELL MALIGNANCY, LOW-GRADE	10/178	350/21671	0.0285714	3.47849	4.25411	0.000658902	0.00891902	0.00636087	3811/3135/3553/355/57379/115650/970/3383/338339/7852	10
C0282548	Leukostasis	2/51	25/21671	0.08	33.9937	8.01677	0.00157355	0.0212554	0.0147495	5950/9370	2		C0162429	Malnutrition	11/178	417/21671	0.0263789	3.21156	4.14989	0.000691965	0.00932134	0.0066478	2323/57817/3553/355/6891/348/3162/567/3383/3107/6890	11
C2700366	Adiponectin Measurement	2/51	25/21671	0.08	33.9937	8.01677	0.00157355	0.0212554	0.0147495	100874095/9370	2		C4505456	HIV Coinfection	6/178	129/21671	0.0465116	5.66266	4.83366	0.000697063	0.00932134	0.0066478	3106/5699/3811/3553/3107/393	6
C0031039	Pericardial effusion	3/51	98/21671	0.0306122	13.0078	5.78639	0.00159558	0.0213832	0.0148383	2167/3952/9370	3		C0024440	Macular Edema, Cystoid	4/178	49/21671	0.0816327	9.93855	5.70043	0.000698761	0.00932134	0.0066478	3553/3105/348/3663	4
C0019337	Heroin Dependence	3/51	100/21671	0.03	12.7476	5.71877	0.00169074	0.0224815	0.0156004	125/3952/9370	3		C0857175	Postinfarction	4/178	49/21671	0.0816327	9.93855	5.70043	0.000698761	0.00932134	0.0066478	3162/8837/5008/1071	4
C1861453	Pseudohyperkalemia Cardiff	4/51	218/21671	0.0183486	7.79673	4.89859	0.00171945	0.022686	0.0157423	4023/5950/3952/9370	4		C0032463	Polycythemia Vera	9/178	291/21671	0.0309278	3.76538	4.32203	0.00069995	0.00932134	0.0066478	57817/3135/5777/355/2048/3105/1118/3107/8837	9
C0853897	Diabetic Cardiomyopathies	4/51	220/21671	0.0181818	7.72585	4.86991	0.00177774	0.0232747	0.0161508	130399/948/3952/9370	4		C0871189	Psychotic symptom	5/178	86/21671	0.0581395	7.07833	5.13982	0.000719209	0.00954691	0.00680867	2995/5973/4245/3105/348	5
C0342276	Maturity onset diabetes mellitus in young	3/51	105/21671	0.0285714	12.1406	5.55784	0.00194398	0.0250695	0.0173963	5105/948/2819	3		C0008370	Cholestasis	11/178	420/21671	0.0261905	3.18862	4.12188	0.000733808	0.00970939	0.00692455	216/3553/2048/1118/348/3162/567/3383/10062/151306/6892	11
C0151814	Coronary Occlusion	2/51	28/21671	0.0714286	30.3515	7.5481	0.00197375	0.0250695	0.0173963	948/9370	2		C0238694	Peripheral arthritis	3/178	22/21671	0.136364	16.6019	6.66286	0.00074797	0.00980222	0.00699075	3105/5698/151306	3
C0279627	Adult Acute Myelomonocytic Leukemia	2/51	28/21671	0.0714286	30.3515	7.5481	0.00197375	0.0250695	0.0173963	10216/9370	2		C0342883	Cholesteryl Ester Transfer Protein Deficiency	3/178	22/21671	0.136364	16.6019	6.66286	0.00074797	0.00980222	0.00699075	348/5360/1071	3
C0279644	Childhood Acute Myelomonocytic Leukemia	2/51	28/21671	0.0714286	30.3515	7.5481	0.00197375	0.0250695	0.0173963	10216/9370	2		C0409979	Neonatal Systemic lupus erythematosus	3/178	22/21671	0.136364	16.6019	6.66286	0.00074797	0.00980222	0.00699075	3106/6737/3663	3
C1280433	Lipoatrophy	3/51	106/21671	0.0283019	12.0261	5.52696	0.0019973	0.0251808	0.0174735	5346/3952/9370	3		C0020443	Hypercholesterolemia	12/178	489/21671	0.0245399	2.98766	4.0458	0.000750591	0.00980535	0.00699298	10911/7114/3553/2048/6401/348/3162/3383/7941/10062/1071/54209	12
C0206081	Hyperandrogenism	3/51	108/21671	0.0277778	11.8034	5.46643	0.00210667	0.025919	0.0179857	2167/948/9370	3		C3658302	Stevens-Johnson Syndrome Toxic Epidermal Necrolysis Spectrum	4/178	50/21671	0.08	9.73978	5.63039	0.000754696	0.00982776	0.00700897	3106/3105/231/3107	4
C0017097	Gardner Syndrome	2/51	29/21671	0.0689655	29.3049	7.40797	0.00211677	0.025919	0.0179857	5950/3952	2		C1719672	Severe Sepsis	7/178	181/21671	0.038674	4.70845	4.55937	0.000759464	0.00985865	0.007031	57817/7114/3135/3553/348/7293/3162	7
C0746556	metabolic disturbance	2/51	29/21671	0.0689655	29.3049	7.40797	0.00211677	0.025919	0.0179857	3952/9370	2		C0086981	Sicca Syndrome	6/178	132/21671	0.0454545	5.53396	4.75492	0.000786304	0.010175	0.00725659	3553/355/6401/3162/567/3383	6
C4048195	Autosomal dominant hypocalcemia	2/51	29/21671	0.0689655	29.3049	7.40797	0.00211677	0.025919	0.0179857	124/125	2		C1397307	Cardiac fibrosis	9/178	297/21671	0.030303	3.68931	4.24685	0.000808749	0.0103668	0.00739338	7471/10911/6275/3553/84166/83881/567/7852/5008	9
C0015302	External exotoses	3/51	109/21671	0.0275229	11.6951	5.43676	0.00216272	0.0262925	0.0182449	10216/125/3952	3		C0019360	Herpes zoster disease	4/178	51/21671	0.0784314	9.5488	5.56229	0.000813722	0.0103668	0.00739338	10866/3106/3105/348	4
C0007820	Cerebrovascular Disorders	4/51	233/21671	0.0171674	7.29479	4.69195	0.00219051	0.0264415	0.0183483	3240/4023/3952/9370	4		C0031046	Pericarditis	4/178	51/21671	0.0784314	9.5488	5.56229	0.000813722	0.0103668	0.00739338	3106/3553/355/6737	4
C1391732	Cancer cachexia	3/51	110/21671	0.0272727	11.5888	5.40747	0.00221969	0.0265511	0.0184244	5346/3991/3952	3		C0263313	Pemphigus Foliaceus	4/178	51/21671	0.0784314	9.5488	5.56229	0.000813722	0.0103668	0.00739338	3811/2048/3105/3107	4
C0747548	Pharyngeal Carcinoma	2/51	30/21671	0.0666667	28.3281	7.27475	0.00226456	0.0265511	0.0184244	124/125	2		C4699152	ST-segment elevation myocardial infarction (STEMI)	4/178	51/21671	0.0784314	9.5488	5.56229	0.000813722	0.0103668	0.00739338	64805/3553/7941/7852	4
C1257965	Compensatory Hyperinsulinemia	2/51	30/21671	0.0666667	28.3281	7.27475	0.00226456	0.0265511	0.0184244	2167/3952	2		C0019187	Hepatitis, Alcoholic	6/178	133/21671	0.0451128	5.49235	4.7292	0.000817931	0.0103882	0.00740868	3106/6275/140691/3553/3383/7852	6
C2718067	Alcoholic Steatohepatitis	2/51	30/21671	0.0666667	28.3281	7.27475	0.00226456	0.0265511	0.0184244	9370/63924	2		C0031106	Aggressive Periodontitis	7/178	184/21671	0.0380435	4.63169	4.50215	0.000836424	0.0105904	0.00755288	3106/3553/6401/3105/3107/7850/3663	7
C0242231	Coronary Stenosis	3/51	111/21671	0.027027	11.4844	5.37856	0.00227759	0.0265511	0.0184244	2167/3240/4023	3		C0019357	Keratitis, Herpetic	3/178	23/21671	0.130435	15.8801	6.49757	0.000854992	0.0106293	0.0075806	3553/3105/348	3
C0033687	Proteinuria	4/51	239/21671	0.0167364	7.11166	4.61438	0.00240166	0.0274261	0.0190315	3240/3952/9370/729	4		C0037061	Siderosis	3/178	23/21671	0.130435	15.8801	6.49757	0.000854992	0.0106293	0.0075806	57817/348/3162	3
C0205700	Asymmetric Septal Hypertrophy	2/51	31/21671	0.0645161	27.4143	7.14789	0.00241711	0.0274261	0.0190315	948/63924	2		C0343466	Type 2 lepra reaction	3/178	23/21671	0.130435	15.8801	6.49757	0.000854992	0.0106293	0.0075806	3553/6401/3383	3
C0600518	Choroidal Neovascularization	2/51	31/21671	0.0645161	27.4143	7.14789	0.00241711	0.0274261	0.0190315	3952/9370	2		C0343467	Erythema nodosum leprosum	3/178	23/21671	0.130435	15.8801	6.49757	0.000854992	0.0106293	0.0075806	3553/6401/3383	3
C1960636	Dysglycemia	2/51	31/21671	0.0645161	27.4143	7.14789	0.00241711	0.0274261	0.0190315	948/9370	2		C1305904	Familial hematuria	3/178	23/21671	0.130435	15.8801	6.49757	0.000854992	0.0106293	0.0075806	1286/1285/8542	3
C0339535	Night blindness, congenital stationary	2/51	32/21671	0.0625	26.5576	7.02689	0.00257438	0.028505	0.0197802	5950/5959	2		C1563715	Andersen Syndrome	3/178	23/21671	0.130435	15.8801	6.49757	0.000854992	0.0106293	0.0075806	1286/1285/348	3
C0342543	Central Precocious Puberty	2/51	32/21671	0.0625	26.5576	7.02689	0.00257438	0.028505	0.0197802	3952/9370	2		C0343804	Chronic Chagas' disease	4/178	52/21671	0.0769231	9.36517	5.49604	0.000875933	0.0108242	0.00771962	3106/3811/3553/6737	4
C0600142	Hot flushes	2/51	32/21671	0.0625	26.5576	7.02689	0.00257438	0.028505	0.0197802	3952/9370	2		C1704423	Milroy Disease	4/178	52/21671	0.0769231	9.36517	5.49604	0.000875933	0.0108242	0.00771962	355/348/231/567	4
C0742343	Acute Chest Syndrome	5/51	405/21671	0.0123457	5.24595	4.18934	0.00257918	0.028505	0.0197802	2167/4023/948/3952/9370	5		C1266025	Traditional Serrated Adenoma	5/178	90/21671	0.0555556	6.76373	4.98632	0.000884013	0.0108914	0.00776751	2048/84870/5742/6737/3383	5
C0205825	Liposarcoma, Pleomorphic	2/51	33/21671	0.0606061	25.7528	6.9113	0.00273635	0.0300469	0.0208502	5346/4826	2		C1270972	Mild cognitive disorder	11/178	430/21671	0.0255814	3.11446	4.0303	0.000888794	0.0109176	0.0077862	274/341/5973/3553/51314/6401/348/3162/7941/54209/2358	11
C0022638	Ketosis	3/51	119/21671	0.0252101	10.7123	5.15987	0.00277473	0.030273	0.0210071	125/4023/3952	3		C0039730	Thalassemia	6/178	136/21671	0.0441176	5.3712	4.6536	0.00091873	0.0112267	0.00800668	57817/3106/355/3105/348/567	6
C1318544	M5b Acute differentiated monocytic leukemia	3/51	122/21671	0.0245902	10.4489	5.08316	0.00297705	0.0322735	0.0223952	2167/948/3952	3		C0035243	Respiratory Tract Infections	7/178	187/21671	0.0374332	4.55738	4.44616	0.000919419	0.0112267	0.00800668	57817/6036/3553/3105/7852/2358/55509	7
C0151945	Thrombosis of cerebral veins	2/51	35/21671	0.0571429	24.2812	6.69481	0.00307433	0.0329208	0.0228444	5346/2878	2		C0017677	Glossitis, Benign Migratory	4/178	53/21671	0.0754717	9.18847	5.43155	0.000941421	0.0114276	0.00814992	3106/3553/3105/3107	4
C0242350	Erectile dysfunction	4/51	256/21671	0.015625	6.6394	4.4084	0.00307545	0.0329208	0.0228444	2167/4023/3952/9370	4		C0042165	Anterior uveitis	4/178	53/21671	0.0754717	9.18847	5.43155	0.000941421	0.0114276	0.00814992	3106/3553/3105/3663	4
C0043094	Weight Gain	3/51	124/21671	0.0241935	10.2804	5.03349	0.00311685	0.0329692	0.022878	948/3952/9370	3		C0022336	Creutzfeldt-Jakob disease	6/178	137/21671	0.0437956	5.33199	4.62889	0.00095437	0.0115507	0.00823772	216/3553/5742/1118/348/54209	6
C0342649	Vascular calcification	4/51	257/21671	0.0155642	6.61357	4.39687	0.0031187	0.0329692	0.022878	10249/152831/3952/9370	4		C0035222	Respiratory Distress Syndrome, Adult	11/178	434/21671	0.0253456	3.08576	3.99442	0.000957953	0.01156	0.0082444	6275/5973/3553/355/2048/231/3162/3383/7941/7852/6892	11
C0333559	Infarction, Lacunar	2/51	36/21671	0.0555556	23.6068	6.59322	0.0032503	0.0339387	0.0235507	5346/3240	2		C0032768	Postherpetic neuralgia	3/178	24/21671	0.125	15.2184	6.34232	0.00097126	0.0115769	0.00825644	3106/3105/348	3
C4331921	Obesity-Associated Insulin Resistance	2/51	36/21671	0.0555556	23.6068	6.59322	0.0032503	0.0339387	0.0235507	3952/9370	2		C0042167	Uveitis, Posterior	3/178	24/21671	0.125	15.2184	6.34232	0.00097126	0.0115769	0.00825644	3106/3105/3383	3
C0018932	Hematochezia	2/51	37/21671	0.0540541	22.9687	6.49567	0.00343087	0.0347818	0.0241358	3952/9370	2		C0598784	Dyslipoproteinemias	3/178	24/21671	0.125	15.2184	6.34232	0.00097126	0.0115769	0.00825644	348/5360/1071	3
C0153405	Malignant neoplasm of pharynx	2/51	37/21671	0.0540541	22.9687	6.49567	0.00343087	0.0347818	0.0241358	124/125	2		C1963961	Testosterone deficiency	3/178	24/21671	0.125	15.2184	6.34232	0.00097126	0.0115769	0.00825644	3553/3640/1071	3
C0432306	Ichthyosis Bullosa of Siemens	2/51	37/21671	0.0540541	22.9687	6.49567	0.00343087	0.0347818	0.0241358	2167/3240	2		C0001339	Acute pancreatitis	11/178	435/21671	0.0252874	3.07866	3.98551	0.000975921	0.0115769	0.00825644	340061/3553/355/2048/6401/348/3162/3383/7941/7852/151306	11
C1855520	Hyperglycemia, Postprandial	2/51	37/21671	0.0540541	22.9687	6.49567	0.00343087	0.0347818	0.0241358	3952/9370	2		C0730285	Diabetic macular edema	5/178	92/21671	0.0543478	6.6167	4.91304	0.000976233	0.0115769	0.00825644	51237/3553/348/3383/7941	5
C1536220	ST segment elevation myocardial infarction	4/51	264/21671	0.0151515	6.43821	4.31784	0.00343322	0.0347818	0.0241358	2167/3240/4023/9370	4		C0242488	Acute Lung Injury	5/178	93/21671	0.0537634	6.54555	4.87721	0.00102493	0.0120962	0.00862674	64805/3553/355/3162/3383	5
C0001339	Acute pancreatitis	5/51	435/21671	0.0114943	4.88416	3.97458	0.00350337	0.0352824	0.0244832	4023/5950/3952/9370/64102	5		C0002962	Angina Pectoris	6/178	139/21671	0.0431655	5.25527	4.58019	0.00102883	0.0120962	0.00862674	5973/3553/348/3383/7941/1071	6
C0012813	Diverticulitis	2/51	38/21671	0.0526316	22.3643	6.4019	0.00361605	0.0359913	0.0249751	3952/9370	2		C0151825	Bone pain	6/178	139/21671	0.0431655	5.25527	4.58019	0.00102883	0.0120962	0.00862674	7471/3553/64859/5696/7852/54209	6
C1334015	High Grade Intraepithelial Neoplasia	2/51	38/21671	0.0526316	22.3643	6.4019	0.00361605	0.0359913	0.0249751	125/50486	2		C0038644	Sudden infant death syndrome	6/178	140/21671	0.0428571	5.21774	4.5562	0.0010677	0.0124818	0.00890177	51237/1844/3553/355/348/3162	6
C0024790	Paroxysmal nocturnal hemoglobinuria	3/51	132/21671	0.0227273	9.65731	4.84556	0.00371617	0.0367728	0.0255174	3240/948/729	3		C0242723	Parasitemia	6/178	140/21671	0.0428571	5.21774	4.5562	0.0010677	0.0124818	0.00890177	2323/57817/3106/3553/348/3383	6
C0746102	Chronic lung disease	3/51	133/21671	0.0225564	9.5847	4.82319	0.00379568	0.0370141	0.0256848	125/5950/9370	3		C0015696	Fatty Liver, Alcoholic	5/178	94/21671	0.0531915	6.47591	4.8419	0.00107542	0.0125138	0.00892459	57817/3106/3553/3105/348	5
C0271708	Fasting Hypoglycemia	2/51	39/21671	0.0512821	21.7908	6.31165	0.0038058	0.0370141	0.0256848	5105/948	2		C0848548	hypertensive nephropathy	4/178	55/21671	0.0727273	8.85434	5.30755	0.0010826	0.0125138	0.00892459	1286/1285/8542/567	4
C3808022	Episodic abdominal pain	2/51	39/21671	0.0512821	21.7908	6.31165	0.0038058	0.0370141	0.0256848	4023/56246	2		C1320214	Invasive Streptococcus pneumoniae disease	4/178	55/21671	0.0727273	8.85434	5.30755	0.0010826	0.0125138	0.00892459	2323/3553/355/3383	4
C0020550	Hyperthyroidism	4/51	279/21671	0.0143369	6.09207	4.15774	0.00417871	0.039934	0.027711	3991/3952/9370/729	4		C2936179	Obesity, Visceral	4/178	55/21671	0.0727273	8.85434	5.30755	0.0010826	0.0125138	0.00892459	216/348/3162/1071	4
C0751633	Carotid Artery Plaque	2/51	41/21671	0.0487805	20.7279	6.14088	0.00419893	0.039934	0.027711	4023/9370	2		C0026766	Multiple Organ Failure	3/178	25/21671	0.12	14.6097	6.19612	0.00109707	0.0126455	0.00901853	3553/355/3383	3
C4285910	Obstructive sleep apnea hypopnea syndrome	2/51	41/21671	0.0487805	20.7279	6.14088	0.00419893	0.039934	0.027711	3952/9370	2		C0015230	Exanthema	8/178	251/21671	0.0318725	3.88039	4.17704	0.00113985	0.0131019	0.00934401	3106/3553/6737/5696/3105/567/54757/5698	8
C0235946	Cerebral atrophy	5/51	454/21671	0.0110132	4.67975	3.8485	0.00419988	0.039934	0.027711	5105/220296/125/9370/7079	5		C0086743	Osteoarthrosis Deformans	5/178	96/21671	0.0520833	6.341	4.77281	0.00118188	0.0135472	0.00966161	526/6275/2512/27071/3553	5
C0342882	Familial hypercholesterolemia - heterozygous	2/51	42/21671	0.047619	20.2344	6.05998	0.00440227	0.0416259	0.0288851	4023/948	2		C0014518	Toxic Epidermal Necrolysis	6/178	143/21671	0.041958	5.10827	4.48556	0.00119109	0.0135771	0.00968293	10866/3106/355/3105/231/3107	6
C0003865	Arthritis, Adjuvant-Induced	2/51	43/21671	0.0465116	19.7638	5.98182	0.0046101	0.0428764	0.0297528	3952/9370	2		C0017205	Gaucher Disease	6/178	143/21671	0.041958	5.10827	4.48556	0.00119109	0.0135771	0.00968293	57817/5660/3811/1118/7852/6362	6
C0971858	Arthritis, Collagen-Induced	2/51	43/21671	0.0465116	19.7638	5.98182	0.0046101	0.0428764	0.0297528	3952/9370	2		C1860320	Bone marrow hypercellularity	3/178	26/21671	0.115385	14.0478	6.05807	0.00123272	0.0139573	0.00995407	355/64859/7852	3
C0993582	Arthritis, Experimental	2/51	43/21671	0.0465116	19.7638	5.98182	0.0046101	0.0428764	0.0297528	3952/9370	2		C0340288	Stable angina	6/178	144/21671	0.0416667	5.0728	4.46245	0.00123456	0.0139573	0.00995407	64805/6275/348/3383/7941/7852	6
C0016053	Fibromyalgia	3/51	143/21671	0.020979	8.91444	4.61183	0.00464826	0.0429964	0.0298361	3240/3952/9370	3		C0037199	Sinusitis	5/178	97/21671	0.0515464	6.27563	4.73899	0.00123795	0.0139573	0.00995407	3553/51314/338339/7852/5698	5
C0021368	Inflammation	5/51	467/21671	0.0107066	4.54948	3.76618	0.00473032	0.043519	0.0301987	3240/3952/9370/7079/364	5		C0700345	Candidiasis, Vulvovaginal	4/178	57/21671	0.0701754	8.54366	5.18971	0.00123801	0.0139573	0.00995407	5660/3553/2760/7852	4
C0024437	Macular degeneration	2/51	44/21671	0.0454545	19.3146	5.90626	0.00482239	0.0438915	0.0304572	948/2878	2		C0017665	Membranous glomerulonephritis	7/178	197/21671	0.035533	4.32604	4.26771	0.00124392	0.0139856	0.00997424	3106/3553/5696/3105/8542/348/6890	7
C0796154	SIMPSON-GOLABI-BEHMEL SYNDROME, TYPE 1	2/51	44/21671	0.0454545	19.3146	5.90626	0.00482239	0.0438915	0.0304572	3952/9370	2		C0003872	Arthritis, Psoriatic	11/178	450/21671	0.0244444	2.97604	3.85488	0.00128073	0.0142826	0.010186	10866/3134/3106/3811/3553/5742/5696/3105/3133/3107/5698	11
C0011175	Dehydration	4/51	295/21671	0.0135593	5.76165	3.99937	0.00508733	0.0460566	0.0319596	10216/125/1357/3952	4		C0278660	Adult Synovial Sarcoma	7/178	198/21671	0.0353535	4.30419	4.25053	0.00128074	0.0142826	0.010186	6275/3553/2048/3105/3107/6890/7852	7
C0678202	Regional enteritis	2/51	46/21671	0.0434783	18.4749	5.76237	0.00526029	0.0473705	0.0328713	3952/9370	2		C0279982	Childhood Synovial Sarcoma	7/178	198/21671	0.0353535	4.30419	4.25053	0.00128074	0.0142826	0.010186	6275/3553/2048/3105/3107/6890/7852	7
C1096903	Sialic Acid Storage Disease, Finnish Type (disorder)	2/51	47/21671	0.0425532	18.0818	5.69378	0.00548586	0.0491417	0.0341005	3952/9370	2		C0026916	Mycobacterium avium-intracellulare Infection	4/178	58/21671	0.0689655	8.39636	5.13293	0.00132128	0.0146158	0.0104237	3106/3553/970/3383	4
C1445957	Serum total cholesterol measurement	5/51	486/21671	0.0102881	4.37162	3.65115	0.00558936	0.0498067	0.0345619	130399/3240/125/4023/948	5		C0036472	Scrub Typhus	4/178	58/21671	0.0689655	8.39636	5.13293	0.00132128	0.0146158	0.0104237	3553/84166/3105/3107	4
C0271561	Somatotropin deficiency	3/51	154/21671	0.0194805	8.27769	4.402	0.00571017	0.0499073	0.0346317	4023/3952/9370	3		C3665365	Arteriosclerotic cardiovascular disease, NOS	4/178	58/21671	0.0689655	8.39636	5.13293	0.00132128	0.0146158	0.0104237	3553/348/10062/1071	4
C0020514	Hyperprolactinemia	2/51	48/21671	0.0416667	17.7051	5.62727	0.0057158	0.0499073	0.0346317	4023/3952	2		C0151669	Increased antibody level in blood	3/178	27/21671	0.111111	13.5275	5.92744	0.00137848	0.0150863	0.0107592	340061/5696/5698	3
C4699512	Large-artery atherosclerosis (embolus/thrombosis)	2/51	48/21671	0.0416667	17.7051	5.62727	0.0057158	0.0499073	0.0346317	4023/9370	2		C0178879	Urinary tract obstruction	3/178	27/21671	0.111111	13.5275	5.92744	0.00137848	0.0150863	0.0107592	567/3383/5008	3
C0947751	Vascular inflammations	4/51	305/21671	0.0131148	5.57274	3.90617	0.00571793	0.0499073	0.0346317	5950/948/3952/9370	4		C0281479	Primary Systemic Amyloidosis	3/178	27/21671	0.111111	13.5275	5.92744	0.00137848	0.0150863	0.0107592	6737/348/567	3
													C0523744	Lipids measurement	3/178	27/21671	0.111111	13.5275	5.92744	0.00137848	0.0150863	0.0107592	348/5360/1071	3
LumA-ceRM5													C0917796	Optic Atrophy, Hereditary, Leber	5/178	100/21671	0.05	6.08736	4.64032	0.00141797	0.0154773	0.0110381	3106/3553/6891/3105/231	5
ID	Description	GeneRatio	BgRatio	RichFactor	FoldEnrichment	zScore	pvalue	p.adjust	qvalue	geneID	Count		C0039483	Giant Cell Arteritis	8/178	260/21671	0.0307692	3.74607	4.05387	0.00142566	0.0155201	0.0110686	3106/3553/355/6401/231/3383/7852/3663	8
C1857679	Sloping forehead	31/364	149/21671	0.208054	12.3866	18.2291	4.40875e-25	1.6524e-21	1.41962e-21	1062/675/83990/54888/2189/22995/284403/2175/7516/9918/55835/259266/10733/55215/57082/9319/3832/2187/2177/5888/23397/55165/699/2176/29089/9928/60386/163786/11113/701/6491	31		C0276447	Rhinovirus infection	7/178	202/21671	0.0346535	4.21896	4.18289	0.00143667	0.0155987	0.0111247	140691/3553/84166/5696/3383/3107/5698	7
C0015625	Fanconi Anemia	42/364	394/21671	0.106599	6.34645	13.9984	1.07899e-21	2.02203e-18	1.73717e-18	675/7272/83990/1111/2189/79915/2175/11200/2237/1763/1719/7516/4175/55247/29980/641/898/55215/29128/9156/2146/2187/3925/1678/7514/2177/5888/983/51659/2956/2176/29089/8836/55388/4436/64858/7398/5111/4173/1869/55010/891	42		C0027947	Neutropenia	10/178	389/21671	0.0257069	3.12975	3.85734	0.00146166	0.0158282	0.0112884	2323/3106/3553/57379/64859/6401/7293/3162/3383/7852	10
C3469521	FANCONI ANEMIA, COMPLEMENTATION GROUP A (disorder)	39/364	360/21671	0.108333	6.4497	13.6283	1.86731e-20	2.33289e-17	2.00424e-17	1062/675/7272/83990/1111/2189/79915/2175/11200/2237/1763/1719/7516/4175/29980/641/55215/29128/9156/2146/2187/3925/1678/2177/5888/983/51659/2956/2176/29089/8836/55388/4436/64858/7398/5111/1869/55010/891	39		C0856742	Post MI	7/178	203/21671	0.0344828	4.19818	4.16626	0.00147787	0.0159618	0.0113837	3553/2048/5742/3162/567/8837/2358	7
C4551705	Abnormality of chromosome stability	15/364	34/21671	0.441176	26.2658	19.2705	2.49136e-18	2.33441e-15	2.00555e-15	675/83990/2189/2175/7516/3070/641/55215/2187/2177/5888/83879/2176/29089/1789	15		C0020479	Hyperlipoproteinemia Type III	3/178	28/21671	0.107143	13.0443	5.80356	0.00153463	0.0164883	0.0117591	341/348/1071	3
C1850049	Clinodactyly of the 5th finger	32/364	284/21671	0.112676	6.70825	12.6563	1.81367e-17	1.35952e-14	1.168e-14	1062/675/83990/54888/990/2189/8318/22995/2175/7516/55835/10293/10733/29980/641/55215/9319/2187/2177/81620/5888/157570/150468/55165/699/2176/29089/5982/23594/4998/51053/701	32		C0031094	Periodontal Pocket	3/178	28/21671	0.107143	13.0443	5.80356	0.00153463	0.0164883	0.0117591	101/3553/5360	3
C0265202	Seckel syndrome	17/364	56/21671	0.303571	18.0733	16.7207	2.51e-17	1.56791e-14	1.34703e-14	1062/1111/990/1063/22995/2175/1763/55835/10293/10733/29980/81620/1786/2176/23594/4998/51053	17		C0031090	Periodontal Diseases	9/178	326/21671	0.0276074	3.36112	3.90903	0.00154595	0.0165666	0.011815	3811/3553/6401/348/5360/3383/54757/7852/54209	9
C0346153	Breast Cancer, Familial	25/364	183/21671	0.136612	8.13329	12.6659	7.11328e-16	3.80865e-13	3.27211e-13	8438/1062/675/1104/7272/83990/10721/1111/2175/11200/348654/7516/641/55215/9156/2187/11073/2177/5888/80119/2956/63967/580/4436/701	25		C4721532	Lymphoma, Non-Hodgkin, Familial	11/178	462/21671	0.0238095	2.89874	3.7542	0.00157754	0.0168612	0.0120251	216/3135/5777/355/57379/115650/970/567/338339/7852/5698	11
C4022016	Abnormality of the preputium	11/364	22/21671	0.5	29.7679	17.6449	1.54475e-14	5.75958e-12	4.9482e-12	675/83990/2189/2175/7516/55215/2187/2177/5888/2176/29089	11		C0155765	Disease of capillaries	4/178	61/21671	0.0655738	7.98342	4.97046	0.00159448	0.0169105	0.0120602	6401/348/3162/1071	4
C4023917	Aplasia/Hypoplasia of the uvula	11/364	22/21671	0.5	29.7679	17.6449	1.54475e-14	5.75958e-12	4.9482e-12	675/83990/2189/2175/7516/55215/2187/2177/5888/2176/29089	11		C0600327	Toxic Shock Syndrome	4/178	61/21671	0.0655738	7.98342	4.97046	0.00159448	0.0169105	0.0120602	3553/2048/3105/3162	4
C4025071	Aplasia/Hypoplasia of fingers	11/364	22/21671	0.5	29.7679	17.6449	1.54475e-14	5.75958e-12	4.9482e-12	675/83990/2189/2175/7516/55215/2187/2177/5888/2176/29089	11		C0678213	Complete hydatidiform mole	4/178	61/21671	0.0655738	7.98342	4.97046	0.00159448	0.0169105	0.0120602	3106/199713/3105/5698	4
C0238093	Stenosis of duodenum	12/364	29/21671	0.413793	24.6355	16.6469	1.69038e-14	5.75958e-12	4.9482e-12	675/83990/2189/8318/2175/7516/55215/2187/2177/5888/2176/29089	12		C0032181	Platelet Count measurement	8/178	265/21671	0.0301887	3.67539	3.98779	0.00160745	0.0170043	0.0121271	10866/100507392/3106/51513/3105/348/85315/4065	8
C1963099	Myelodysplasia, CTCAE	16/364	68/21671	0.235294	14.0084	14.0424	1.92231e-14	6.00402e-12	5.15821e-12	675/1736/83990/2189/2175/7516/55215/9319/2187/2177/5888/699/2176/29089/9837/701	16		C0022116	Ischemia	5/178	103/21671	0.0485437	5.91006	4.5456	0.00161658	0.0170133	0.0121336	6275/6401/348/231/3162	5
C0272027	Pyridoxine-responsive sideroblastic anemia	11/364	24/21671	0.458333	27.2872	16.8411	5.30407e-14	1.41998e-11	1.21994e-11	675/83990/2189/2175/7516/55215/2187/2177/5888/2176/29089	11		C0028840	Ocular Hypertension	5/178	103/21671	0.0485437	5.91006	4.5456	0.00161658	0.0170133	0.0121336	64805/3553/355/3105/231	5
C0342526	Absent testes	11/364	24/21671	0.458333	27.2872	16.8411	5.30407e-14	1.41998e-11	1.21994e-11	675/83990/2189/2175/7516/55215/2187/2177/5888/2176/29089	11		C0206694	Mucoepidermoid Carcinoma	6/178	153/21671	0.0392157	4.7744	4.26367	0.00168257	0.0175035	0.0124831	216/3135/2048/5742/3162/7852	6
C1861975	Cafe au lait spots, multiple	15/364	61/21671	0.245902	14.6399	13.9434	6.27909e-14	1.56893e-11	1.34791e-11	675/83990/2189/2175/7516/55215/9319/2187/2177/5888/699/2176/29089/4436/701	15		C0205748	Dysplastic Nevus	5/178	104/21671	0.0480769	5.85323	4.51485	0.00168711	0.0175035	0.0124831	3106/3553/2048/348/5008	5
C4025211	Abnormal carotid artery morphology	12/364	32/21671	0.375	22.3259	15.7791	7.02885e-14	1.64651e-11	1.41456e-11	675/83990/2189/2175/7516/55215/2187/2177/5888/2176/29089/5982	12		C0011253	Delusions	4/178	62/21671	0.0645161	7.85466	4.91876	0.00169364	0.0175035	0.0124831	5660/3553/348/23780	4
C0423109	Upward slant of palpebral fissure	24/364	216/21671	0.111111	6.61508	10.8402	2.90506e-13	6.40481e-11	5.50253e-11	675/83990/2189/22995/284403/2175/7516/55835/259266/29980/55215/57082/5422/3832/2187/2177/5888/2176/29089/9928/163786/11113/701/6491	24		C0262985	Psoriasiform eczema	4/178	62/21671	0.0645161	7.85466	4.91876	0.00169364	0.0175035	0.0124831	3106/3383/3107/7852	4
C4025756	Abnormal aortic morphology	11/364	29/21671	0.37931	22.5825	15.201	6.81914e-13	1.4199e-10	1.21987e-10	675/83990/2189/2175/7516/55215/2187/2177/5888/2176/29089	11		C2733158	Cerebral Small Vessel Diseases	4/178	62/21671	0.0645161	7.85466	4.91876	0.00169364	0.0175035	0.0124831	3553/8542/348/7941	4
C0151640	Decreased fertility in males	11/364	30/21671	0.366667	21.8298	14.9219	1.06064e-12	1.95489e-10	1.67949e-10	675/83990/2189/2175/7516/55215/2187/2177/5888/2176/29089	11		C0302314	Xanthoma	3/178	29/21671	0.103448	12.5945	5.68584	0.00170143	0.0175035	0.0124831	5742/348/1071	3
C3887489	Clubbing of toes	11/364	30/21671	0.366667	21.8298	14.9219	1.06064e-12	1.95489e-10	1.67949e-10	675/83990/2189/2175/7516/55215/2187/2177/5888/2176/29089	11		C0860564	Retinoic acid syndrome	3/178	29/21671	0.103448	12.5945	5.68584	0.00170143	0.0175035	0.0124831	3553/3383/7852	3
C0431350	Primary microcephaly	12/364	39/21671	0.307692	18.3187	14.1487	1.09532e-12	1.95489e-10	1.67949e-10	1062/22995/284403/9918/55835/259266/10733/57082/25886/9928/11113/6491	12		C0878675	Erdheim-Chester Disease	3/178	29/21671	0.103448	12.5945	5.68584	0.00170143	0.0175035	0.0124831	3553/2048/6362	3
C4024780	Almond-shaped palpebral fissure	12/364	40/21671	0.3	17.8607	13.9504	1.5413e-12	2.62582e-10	2.2559e-10	675/83990/2189/2175/7516/55215/2187/2177/5888/2176/29089/56992	12		C1334815	Multi-centric Castleman's Disease	3/178	29/21671	0.103448	12.5945	5.68584	0.00170143	0.0175035	0.0124831	51237/57817/3553	3
C0423112	Short palpebral fissure	16/364	91/21671	0.175824	10.4678	11.8294	2.40032e-12	3.75868e-10	3.22917e-10	675/83990/2189/2175/7516/29980/55215/2187/2177/5888/2176/29089/203068/56992/4998/51053	16		C0008354	Cholera	7/178	209/21671	0.0334928	4.07766	4.06864	0.00174484	0.0178165	0.0127063	6275/3553/348/7453/3383/1071/6892	7
C4024748	Aplasia/Hypoplasia of the iris	13/364	52/21671	0.25	14.8839	13.1013	2.40684e-12	3.75868e-10	3.22917e-10	675/83990/2189/2175/7516/55215/2187/2177/5888/55165/2176/29089/5982	13		C0021831	Intestinal Diseases	7/178	209/21671	0.0334928	4.07766	4.06864	0.00174484	0.0178165	0.0127063	3135/3553/5742/231/3162/567/151306	7
C4021750	Abnormality of femur morphology	11/364	33/21671	0.333333	19.8452	14.1602	3.592e-12	5.38513e-10	4.6265e-10	675/83990/2189/2175/7516/55215/2187/2177/5888/2176/29089	11		C1845050	PIGMENTARY DISORDER, RETICULATE, WITH SYSTEMIC MANIFESTATIONS	7/178	209/21671	0.0334928	4.07766	4.06864	0.00174484	0.0178165	0.0127063	7114/3553/348/3162/3383/7941/2358	7
C0266387	Bicornuate uterus	12/364	44/21671	0.272727	16.237	13.2235	5.47762e-12	7.8962e-10	6.78383e-10	675/83990/2189/2175/7516/55215/2187/2177/5888/157570/2176/29089	12		C0022578	Keratoconus	8/178	269/21671	0.0297398	3.62073	3.93607	0.00176573	0.0179407	0.0127949	2014/6275/3553/355/1286/1285/3105/3162	8
C2749675	Cortical gyral simplification	11/364	39/21671	0.282051	16.7921	12.9016	2.84252e-11	3.94584e-09	3.38997e-09	1062/22995/284403/259266/10293/10733/29980/3832/9928/11113/51053	11		C0428474	Serum LDL cholesterol measurement	8/178	269/21671	0.0297398	3.62073	3.93607	0.00176573	0.0179407	0.0127949	341/5699/355/5742/1379/348/3383/1071	8
C0026985	Myelodysplasia	20/364	181/21671	0.110497	6.57853	9.85054	3.19876e-11	4.28177e-09	3.67858e-09	675/1736/83990/2189/2175/7516/55215/9319/2146/2187/2177/5888/1786/699/2176/29089/4436/9837/1869/701	20		C4082937	Necrotizing enterocolitis in fetus OR newborn	7/178	210/21671	0.0333333	4.05824	4.05272	0.00179276	0.0181688	0.0129576	3553/6737/6401/3162/3383/2760/3663	7
C4020968	Abnormal localization of kidney	11/364	40/21671	0.275	16.3723	12.7189	3.86226e-11	4.99164e-09	4.28844e-09	675/83990/2189/2175/7516/55215/2187/2177/5888/2176/29089	11		C0085435	Arthritis, Reactive	4/178	63/21671	0.0634921	7.72998	4.86819	0.00179701	0.0181688	0.0129576	3106/6891/3107/6890	4
C4021174	Microtia, third degree	7/364	10/21671	0.7	41.675	16.8154	4.09292e-11	5.11343e-09	4.39307e-09	990/8318/2187/81620/23594/4998/51053	7		C0940937	precancerous lesions	8/178	270/21671	0.0296296	3.60732	3.92329	0.00180716	0.0182266	0.0129989	3553/355/5742/6737/57379/3383/6362/151306	8
C0004135	Ataxia Telangiectasia	28/364	384/21671	0.0729167	4.34115	8.63421	8.81004e-11	1.06516e-08	9.15107e-09	675/7153/1111/2175/11200/1017/5347/1719/55247/995/641/9156/2146/7298/2177/5888/9133/8914/983/1786/63967/699/2176/4436/9656/1869/891/701	28		C0011875	Diabetic Angiopathies	5/178	106/21671	0.0471698	5.74279	4.45454	0.00183491	0.0184612	0.0131662	5973/348/231/3162/3383	5
C1860236	Irregular hyperpigmentation	12/364	55/21671	0.218182	12.9896	11.6364	9.65221e-11	1.13052e-08	9.71254e-09	675/83990/2189/2175/7516/55215/2187/2177/5888/2176/29089/203068	12		C0031350	Pharyngitis	3/178	30/21671	0.1	12.1747	5.57378	0.00187914	0.0186779	0.0133207	116071/3107/7852	3
C3711387	Autosomal Recessive Primary Microcephaly	10/364	33/21671	0.30303	18.0411	12.8046	1.03757e-10	1.17842e-08	1.01241e-08	22995/284403/55835/259266/641/57082/9928/163786/11113/6491	10		C0149781	Spontaneous pneumothorax	3/178	30/21671	0.1	12.1747	5.57378	0.00187914	0.0186779	0.0133207	3106/5742/3162	3
C0702139	Congenital absence of external ear	7/364	11/21671	0.636364	37.8864	15.9938	1.10933e-10	1.22288e-08	1.0506e-08	990/8318/2187/81620/23594/4998/51053	7		C0409818	Chronic Infantile Neurological, Cutaneous, and Articular Syndrome	3/178	30/21671	0.1	12.1747	5.57378	0.00187914	0.0186779	0.0133207	340061/3553/5336	3
C0026010	Microphthalmos	26/364	337/21671	0.0771513	4.59326	8.68933	1.24449e-10	1.33267e-08	1.14493e-08	675/83990/2189/1063/2175/1017/7516/10733/29980/55215/9319/1870/3832/2187/2177/5888/157570/55165/699/2176/29089/9928/203068/3149/1869/701	26		C3203653	IgG4-Related Sclerosing Disease	3/178	30/21671	0.1	12.1747	5.57378	0.00187914	0.0186779	0.0133207	3553/57379/6362	3
C0342573	PITUITARY DWARFISM I	9/364	25/21671	0.36	21.4329	13.3607	1.55428e-10	1.59354e-08	1.36905e-08	675/1763/55835/10293/10733/81620/25886/4998/51053	9		C3658301	Mycoplasma-Induced Stevens-Johnson Syndrome	3/178	30/21671	0.1	12.1747	5.57378	0.00187914	0.0186779	0.0133207	3106/3105/3107	3
C2749463	Aplasia/Hypoplasia of the radius	11/364	45/21671	0.244444	14.5532	11.8954	1.57314e-10	1.59354e-08	1.36905e-08	675/83990/2189/2175/7516/55215/2187/2177/5888/2176/29089	11		C0011269	Dementia, Vascular	7/178	212/21671	0.0330189	4.01995	4.02119	0.00189166	0.0187571	0.0133772	57817/3553/1118/79890/348/3383/1071	7
C1860614	ULNAR HYPOPLASIA	11/364	50/21671	0.22	13.0979	11.1937	5.37037e-10	5.16035e-08	4.43339e-08	675/83990/2189/2175/7516/55215/2187/2177/5888/2176/29089	11		C0178468	Autoimmune thyroid disease	5/178	107/21671	0.046729	5.68912	4.42496	0.00191226	0.0189158	0.0134904	7253/7114/3135/355/3107	5
C3164445	Abnormality of aortic valve	11/364	50/21671	0.22	13.0979	11.1937	5.37037e-10	5.16035e-08	4.43339e-08	675/83990/2189/2175/7516/55215/2187/2177/5888/2176/29089	11		C0850666	Infection caused by Helicobacter pylori	9/178	337/21671	0.0267062	3.25141	3.79074	0.00193792	0.0191236	0.0136386	1769/3553/5742/6737/57379/6401/1118/3383/3107	9
C0079924	Oligohydramnios	16/364	129/21671	0.124031	7.38427	9.50566	5.50732e-10	5.16035e-08	4.43339e-08	675/83990/2189/2175/7516/29980/55215/2187/2177/5888/55165/2176/29089/9928/27235/701	16		C0018681	Headache	9/178	338/21671	0.0266272	3.24179	3.78023	0.00197717	0.0194642	0.0138815	51237/1844/3553/355/51314/5742/10385/348/231	9
C0040588	Tracheoesophageal Fistula	13/364	80/21671	0.1625	9.67455	10.1596	7.81914e-10	7.14783e-08	6.14088e-08	675/1736/83990/2189/2175/7516/55215/2187/2177/5888/2176/29089/5982	13		C0162323	Polyarthritis	4/178	65/21671	0.0615385	7.49213	4.77032	0.00201672	0.0197591	0.0140918	3553/3105/3107/3663	4
C3278923	Dilated ventricles (finding)	28/364	427/21671	0.0655738	3.90398	7.92152	9.91675e-10	8.8095e-08	7.56846e-08	29899/675/1736/83990/2189/22995/284403/2175/84823/7516/10535/55835/259266/24137/55215/57082/2187/7468/2177/5888/2176/29089/9928/60386/163786/11113/701/6491	28		C1328840	Autoimmune Lymphoproliferative Syndrome	4/178	65/21671	0.0615385	7.49213	4.77032	0.00201672	0.0197591	0.0140918	355/3105/115650/6890	4
C1849172	Frontal lobe hypoplasia	9/364	30/21671	0.3	17.8607	12.0786	1.01069e-09	8.8095e-08	7.56846e-08	22995/284403/55835/259266/57082/9928/163786/11113/6491	9		C1848296	DOSAGE-SENSITIVE SEX REVERSAL	6/178	159/21671	0.0377358	4.59423	4.13957	0.00204352	0.019974	0.0142451	3106/3553/6891/3105/231/6890	6
C0080178	Spina Bifida	18/364	179/21671	0.100559	5.98683	8.75653	1.46638e-09	1.24909e-07	1.07312e-07	675/83990/2189/2175/1719/7516/55215/10797/2187/7298/2177/5888/4001/2176/29089/54858/3835/60386	18		C1274933	Drug-Induced Stevens Johnson Syndrome	3/178	31/21671	0.0967742	11.782	5.46691	0.002068	0.0201178	0.0143476	3106/3105/3107	3
C1531647	Cerebral ventriculomegaly	27/364	410/21671	0.0658537	3.92064	7.80365	1.81902e-09	1.51504e-07	1.30161e-07	29899/675/1736/83990/2189/22995/284403/2175/84823/7516/10535/55835/259266/55215/57082/2187/7468/2177/5888/2176/29089/9928/60386/163786/11113/701/6491	27		C1395512	Placental dysfunction	3/178	31/21671	0.0967742	11.782	5.46691	0.002068	0.0201178	0.0143476	3553/3162/2358	3
C0241397	Triphalangeal thumb	11/364	56/21671	0.196429	11.6945	10.4736	1.95642e-09	1.59405e-07	1.36949e-07	675/83990/2189/2175/7516/55215/2187/2177/5888/2176/29089	11		C0155094	Corneal pannus	4/178	66/21671	0.0606061	7.37862	4.72294	0.00213325	0.0206548	0.0147306	101/6275/3553/3383	4
C0848558	Hypospadias	25/364	366/21671	0.068306	4.06665	7.73362	3.53471e-09	2.81874e-07	2.42165e-07	675/1736/83990/54888/990/2189/8318/2175/5426/7516/55215/2187/7468/2177/81620/5888/157570/83879/2176/29089/203068/23594/4998/51053/701	25		C3463897	HYDATIDIFORM MOLE, RECURRENT, 1	4/178	66/21671	0.0606061	7.37862	4.72294	0.00213325	0.0206548	0.0147306	2512/199713/3105/5698	4
C4021780	Abnormality of the liver	12/364	75/21671	0.16	9.52571	9.66705	4.25152e-09	3.31973e-07	2.85206e-07	675/83990/2189/2175/7516/55215/2187/2177/5888/2176/29089/90381	12		C0024419	Waldenstrom Macroglobulinemia	6/178	162/21671	0.037037	4.50916	4.07982	0.00224455	0.0216564	0.0154449	3553/57379/115650/970/7852/5336	6
C1868578	Patellar aplasia	7/364	17/21671	0.411765	24.5147	12.6769	5.99273e-09	4.58383e-07	3.93808e-07	990/8318/81620/157570/23594/4998/51053	7		C1963077	Bone Pain, CTCAE 3.0	4/178	67/21671	0.0597015	7.26849	4.67653	0.00225434	0.0216564	0.0154449	7471/64859/5696/54209	4
C1868684	EAR, PATELLA, SHORT STATURE SYNDROME	12/364	78/21671	0.153846	9.15934	9.4355	6.75586e-09	5.0642e-07	4.35078e-07	675/990/8318/11200/2305/2177/81620/4171/23594/4174/4998/51053	12		C4554063	Bone Pain, CTCAE 5.0	4/178	67/21671	0.0597015	7.26849	4.67653	0.00225434	0.0216564	0.0154449	7471/64859/5696/54209	4
C1846460	Abnormality of the outer ear	13/364	95/21671	0.136842	8.14699	9.1247	6.90203e-09	5.07232e-07	4.35775e-07	675/83990/2189/2175/7516/55215/2187/2177/5888/157570/2176/29089/203068	13		C0221292	Basophilic leukemia	3/178	32/21671	0.09375	11.4138	5.36484	0.00226826	0.0216564	0.0154449	6891/5696/567	3
C0025037	Meckel Diverticulum	11/364	63/21671	0.174603	10.3951	9.76078	7.28429e-09	5.25029e-07	4.51066e-07	675/83990/2189/2175/7516/55215/2187/2177/5888/2176/29089	11		C2938905	Central Nervous System Sensitization	3/178	32/21671	0.09375	11.4138	5.36484	0.00226826	0.0216564	0.0154449	3553/2048/7852	3
C0005859	Bloom Syndrome	16/364	155/21671	0.103226	6.14562	8.40315	8.28439e-09	5.85847e-07	5.03316e-07	116028/8438/675/83990/11200/2237/1763/641/9156/2187/11073/2177/5888/2176/4436/7374	16		C4087436	HIV viraemia	3/178	32/21671	0.09375	11.4138	5.36484	0.00226826	0.0216564	0.0154449	3106/355/3105	3
C0151311	Cranial nerve palsies	12/364	81/21671	0.148148	8.82011	9.21611	1.05155e-08	7.29852e-07	6.27034e-07	675/83990/2189/2175/7516/55215/2187/2177/5888/157570/2176/29089	12		C0271441	Chronic otitis media	6/178	163/21671	0.0368098	4.48149	4.06022	0.00231477	0.0220493	0.0157251	51314/6891/115650/6890/338339/6892	6
C0265219	Miller Dieker syndrome	17/364	182/21671	0.0934066	5.56103	8.07624	1.28834e-08	8.77945e-07	7.54265e-07	675/7084/83990/2189/2175/11200/5347/7516/9700/641/55215/2146/2187/2177/5888/2176/29089	17		C0034150	Purpura	4/178	68/21671	0.0588235	7.1616	4.63108	0.00238008	0.0225669	0.0160943	3106/3553/3105/115650	4
C0238461	Anaplastic thyroid carcinoma	25/364	392/21671	0.0637755	3.79692	7.3041	1.39909e-08	9.3639e-07	8.04476e-07	1017/147841/23492/5347/259266/4176/9768/29128/2146/3925/11065/7514/2305/1033/983/55165/699/4436/10615/5111/8140/4174/1869/9212/701	25		C1304508	Spindle cell hemangioma	4/178	68/21671	0.0588235	7.1616	4.63108	0.00238008	0.0225669	0.0160943	7253/3553/5742/3105	4
C4021741	Abnormal cortical bone morphology	9/364	41/21671	0.219512	13.0688	10.1099	2.10275e-08	1.36472e-06	1.17247e-06	22995/284403/55835/259266/57082/9928/163786/11113/6491	9		C0178664	Glomerulosclerosis (disorder)	7/178	221/21671	0.0316742	3.85625	3.88391	0.00239018	0.0226106	0.0161254	341/6275/3553/8542/348/3383/7852	7
C0008297	Choanal Atresia	13/364	104/21671	0.125	7.44196	8.60714	2.11189e-08	1.36472e-06	1.17247e-06	675/83990/2189/8318/2175/7516/8458/55215/2187/2177/5888/2176/29089	13		C0022548	Keloid	6/178	165/21671	0.0363636	4.42717	4.02151	0.00246016	0.0231949	0.0165422	6275/2512/5742/84166/8542/5008	6
C1136382	Sclerocystic Ovaries	15/364	144/21671	0.104167	6.20164	8.18556	2.15194e-08	1.36703e-06	1.17445e-06	55872/29127/7272/7153/990/6241/259266/4085/3070/1164/54443/3161/9134/55165/891	15		C0038436	Post-Traumatic Stress Disorder	10/178	418/21671	0.0239234	2.91261	3.59332	0.00247003	0.0231949	0.0165422	51237/3106/1844/3553/2048/10170/348/3162/3383/3107	10
C4025819	Abnormality of the hypothalamus-pituitary axis	11/364	70/21671	0.157143	9.35561	9.15186	2.30462e-08	1.43962e-06	1.23681e-06	675/83990/2189/2175/7516/55215/2187/2177/5888/2176/29089	11		C0002949	Aneurysm, Dissecting	3/178	33/21671	0.0909091	11.0679	5.26719	0.00248014	0.0231949	0.0165422	3553/348/3383	3
C4721414	Mantle cell lymphoma	27/364	466/21671	0.0579399	3.44949	6.98665	2.73367e-08	1.67964e-06	1.44302e-06	55872/1111/990/22974/11200/1017/5347/991/4175/79733/2146/7468/7514/9833/6790/10635/81620/5888/6502/1786/4691/4436/5111/51053/1869/9212/891	27		C0392163	Corneal erosion	3/178	33/21671	0.0909091	11.0679	5.26719	0.00248014	0.0231949	0.0165422	3106/1286/1285	3
C0521620	Dilatation of ureter	11/364	72/21671	0.152778	9.09573	8.99342	3.12385e-08	1.85844e-06	1.59663e-06	675/83990/2189/2175/7516/55215/2187/2177/5888/2176/29089	11		C0683381	inflammatory joint disease	3/178	33/21671	0.0909091	11.0679	5.26719	0.00248014	0.0231949	0.0165422	3106/3553/5008	3
C0679427	myeloblastosis	11/364	72/21671	0.152778	9.09573	8.99342	3.12385e-08	1.85844e-06	1.59663e-06	9088/55872/7153/4605/11065/2305/6240/286826/1869/1163/891	11		C0345967	Malignant mesothelioma	10/178	420/21671	0.0238095	2.89874	3.57595	0.00255622	0.0238523	0.017011	3384/3135/3553/2048/6368/7293/3162/3383/8837/7852	10
C1857453	Renal hypoplasia/aplasia	11/364	73/21671	0.150685	8.97114	8.91649	3.62337e-08	2.12194e-06	1.82301e-06	675/83990/2189/2175/7516/55215/2187/2177/5888/2176/29089	11		C0010414	Infection by Cryptococcus neoformans	6/178	167/21671	0.0359281	4.37415	3.9834	0.00261231	0.024224	0.0172761	1769/355/1118/3383/6890/338339	6
C1262477	Weight decreased	20/364	271/21671	0.0738007	4.39378	7.34819	3.76332e-08	2.16999e-06	1.86429e-06	675/83990/2189/8318/2175/11200/5426/7516/55835/55215/9319/2187/2177/5888/2956/150468/2176/29089/4436/4174	20		C0149940	Sciatic Neuropathy	5/178	115/21671	0.0434783	5.29336	4.201	0.00261961	0.024224	0.0172761	3553/355/348/3162/3383	5
C0018817	Atrial Septal Defects	24/364	384/21671	0.0625	3.72098	7.03158	4.02376e-08	2.28501e-06	1.96311e-06	675/83990/2189/8318/2175/7516/10293/55215/890/5422/9319/3832/2187/7468/2177/5888/157570/699/2176/29089/11169/5982/56992/701	24		C0242584	Autoimmune thrombocytopenia	5/178	115/21671	0.0434783	5.29336	4.201	0.00261961	0.024224	0.0172761	3811/3553/355/5742/7293	5
C2674432	Reduced bone mineral density	11/364	76/21671	0.144737	8.61701	8.69428	5.57523e-08	3.1188e-06	2.67944e-06	675/83990/2189/2175/7516/55215/2187/2177/5888/2176/29089	11		C1963943	Atherothrombosis	5/178	115/21671	0.0434783	5.29336	4.201	0.00261961	0.024224	0.0172761	64805/3553/5742/348/1071	5
C0685776	Congenital absence of mandible	6/364	14/21671	0.428571	25.5153	11.9928	5.77679e-08	3.13789e-06	2.69584e-06	990/8318/81620/23594/4998/51053	6		C0007133	Carcinoma, Papillary	7/178	225/21671	0.0311111	3.78769	3.8252	0.0026418	0.0243032	0.0173326	51237/6275/7253/1844/355/5742/3640	7
C1849364	Absent earlobe	6/364	14/21671	0.428571	25.5153	11.9928	5.77679e-08	3.13789e-06	2.69584e-06	1062/22995/55835/10293/10733/157570	6		C0023364	Leptospirosis	4/178	70/21671	0.0571429	6.95698	4.54286	0.00264589	0.0243032	0.0173326	3811/3553/6401/3383	4
C0282160	Aplasia Cutis Congenita	24/364	393/21671	0.0610687	3.63577	6.89219	6.22134e-08	3.33108e-06	2.86182e-06	55872/675/7153/220134/1017/6241/9768/2146/3925/1678/9833/2305/7298/9232/6502/983/6240/580/4436/3835/5111/1869/891/701	24		C3887551	Memory dysfunction	4/178	70/21671	0.0571429	6.95698	4.54286	0.00264589	0.0243032	0.0173326	3553/348/5360/3162	4
C4228778	Abnormality of radial ray	8/364	34/21671	0.235294	14.0084	9.92165	7.2757e-08	3.84075e-06	3.29969e-06	675/83990/2189/2175/55215/2187/2177/2176	8		C0013581	Ectopia Lentis	3/178	34/21671	0.0882353	10.7424	5.17366	0.00270386	0.0245616	0.0175168	6891/6890/6892	3
C1333600	Hereditary Malignant Neoplasm	10/364	63/21671	0.15873	9.45011	8.77899	9.15739e-08	4.76693e-06	4.09539e-06	675/83990/11200/7516/641/11073/5888/2956/580/4436	10		C0206182	Lymphomatoid Papulosis	3/178	34/21671	0.0882353	10.7424	5.17366	0.00270386	0.0245616	0.0175168	3553/567/7852	3
C0266009	Congenital absence of breast	6/364	15/21671	0.4	23.8143	11.5527	9.49191e-08	4.80752e-06	4.13026e-06	990/8318/81620/23594/4998/51053	6		C0338437	Neurocysticercosis	3/178	34/21671	0.0882353	10.7424	5.17366	0.00270386	0.0245616	0.0175168	355/3105/3383	3
C1969653	MUNGAN SYNDROME	6/364	15/21671	0.4	23.8143	11.5527	9.49191e-08	4.80752e-06	4.13026e-06	990/8318/23594/4174/4998/51053	6		C0878521	Beta thalassemia trait	3/178	34/21671	0.0882353	10.7424	5.17366	0.00270386	0.0245616	0.0175168	57817/57379/1071	3
C1306503	Congenital exomphalos	18/364	235/21671	0.0765957	4.56018	7.17221	1.04098e-07	5.20215e-06	4.46929e-06	675/83990/2189/2175/7516/3070/55215/2146/2187/2177/5888/83879/2176/29089/1789/5982/203068/51053	18		C2939094	Skin sensitisation	3/178	34/21671	0.0882353	10.7424	5.17366	0.00270386	0.0245616	0.0175168	3553/3162/3383	3
C1855710	Bone marrow hypocellularity	10/364	64/21671	0.15625	9.30246	8.69397	1.06927e-07	5.27321e-06	4.53034e-06	675/1736/83990/2189/2175/55215/2187/2177/2176/29089	10		C0011603	Dermatitis	11/178	496/21671	0.0221774	2.70004	3.48561	0.00273663	0.0248044	0.01769	3106/3553/6737/348/7293/3162/3383/6890/8837/5008/151306	11
C0346429	Multiple malignancy	15/364	163/21671	0.0920245	5.47875	7.50187	1.13357e-07	5.51768e-06	4.74037e-06	100128191/4751/11200/2237/5983/24137/641/10051/4605/2146/3838/7514/2305/5888/1869	15		C1292753	Primary Effusion Lymphoma	6/178	169/21671	0.035503	4.32239	3.94589	0.00277143	0.0250419	0.0178594	3553/2048/3383/3107/8837/3663	6
C0221354	Frontal bossing	21/364	321/21671	0.0654206	3.89486	6.82968	1.34523e-07	6.46401e-06	5.55339e-06	675/83990/2189/2175/5426/7516/54892/55215/9319/2187/7468/2177/5888/150468/699/2176/29089/3835/4998/51053/701	21		C0041834	Erythema	7/178	227/21671	0.030837	3.75432	3.79634	0.002775	0.0250419	0.0178594	340061/3106/5973/3553/5696/3383/5336	7
C1836735	hypopigmented skin patch	13/364	123/21671	0.105691	6.29239	7.69343	1.59151e-07	7.55059e-06	6.4869e-06	675/1736/83990/2189/2175/7516/641/55215/2187/2177/5888/2176/29089	13		C0085109	Corneal Neovascularization	5/178	117/21671	0.042735	5.20287	4.14826	0.0028226	0.0254157	0.018126	7471/3553/348/3383/7852	5
C0266491	Neuronal heterotopia	10/364	67/21671	0.149254	8.88593	8.44972	1.67414e-07	7.84335e-06	6.73842e-06	29899/22995/284403/55835/259266/57082/9928/163786/11113/6491	10		C0026269	Mitral Valve Stenosis	6/178	170/21671	0.0352941	4.29696	3.92735	0.00285365	0.0255837	0.0182458	3553/2048/6891/348/3162/567	6
C2145472	Urothelial Carcinoma	25/364	449/21671	0.0556793	3.31491	6.47862	1.93143e-07	8.93705e-06	7.67804e-06	675/55635/1111/11200/23492/5347/6241/991/4288/4085/898/2146/3925/1678/3838/2305/6790/6502/1786/9585/55388/4436/1789/1163/701	25		C0040100	Thymoma	8/178	291/21671	0.0274914	3.347	3.66815	0.00286955	0.0255837	0.0182458	3105/970/7293/3383/3107/4065/8837/7852	8
C0221352	Syndactyly of fingers	15/364	171/21671	0.0877193	5.22243	7.24537	2.12711e-07	9.72245e-06	8.3528e-06	675/83990/2189/2175/7516/641/55215/2146/2187/2177/5888/157570/150468/2176/29089	15		C0030491	Parapsoriasis	2/178	10/21671	0.2	24.3494	6.72091	0.00289099	0.0255837	0.0182458	3105/3133	2
C2676033	Hepatoblastoma Caused By Somatic Mutation	12/364	106/21671	0.113208	6.73989	7.74285	2.24633e-07	1.01437e-05	8.71467e-06	3181/4176/6426/898/10797/2305/8833/6502/983/1786/1789/5111	12		C0242073	Pulmonary congestion	2/178	10/21671	0.2	24.3494	6.72091	0.00289099	0.0255837	0.0182458	3553/5008	2
C0279680	Transitional cell carcinoma of bladder	21/364	333/21671	0.0630631	3.7545	6.62076	2.48135e-07	1.10716e-05	9.51185e-06	55872/675/7153/9125/1111/23492/29128/2146/54443/11065/1678/2956/55165/699/4171/4436/10615/5111/4174/891/701	21		C0279705	Thymoma, type B3	2/178	10/21671	0.2	24.3494	6.72091	0.00289099	0.0255837	0.0182458	970/4065	2
C0265660	Syndactyly of the toes	13/364	129/21671	0.100775	5.99972	7.44418	2.78691e-07	1.22886e-05	1.05575e-05	675/83990/54888/2189/2175/7516/55215/2187/2177/5888/2176/29089/90381	13		C0343052	Guttate psoriasis	2/178	10/21671	0.2	24.3494	6.72091	0.00289099	0.0255837	0.0182458	348/3107	2
C0221263	Cafe-au-Lait Spots	10/364	74/21671	0.135135	8.04537	7.93491	4.36988e-07	1.88256e-05	1.61736e-05	675/2175/641/55215/2177/5888/157570/2956/2176/4436	10		C1411980	Mycobacterium avium infection	2/178	10/21671	0.2	24.3494	6.72091	0.00289099	0.0255837	0.0182458	970/3383	2
C0677776	Hereditary Breast and Ovarian Cancer Syndrome	10/364	74/21671	0.135135	8.04537	7.93491	4.36988e-07	1.88256e-05	1.61736e-05	675/83990/2175/11200/1017/5888/2956/2176/580/4436	10		C1833213	Hyperferritinemia, hereditary, with congenital cataracts	2/178	10/21671	0.2	24.3494	6.72091	0.00289099	0.0255837	0.0182458	57817/2512	2
C3553764	Joint hyperflexibility	15/364	181/21671	0.0828729	4.9339	6.94646	4.44417e-07	1.89281e-05	1.62616e-05	1062/54888/990/8318/22995/55835/10293/10733/2146/81620/5982/23594/3835/4998/51053	15		C0029458	Osteoporosis, Postmenopausal	6/178	171/21671	0.0350877	4.27183	3.90895	0.0029377	0.0258475	0.0184339	57817/3106/3553/3105/3383/5336	6
C1857665	Aplastic clavicle	6/364	19/21671	0.315789	18.8008	10.1458	4.86093e-07	2.02431e-05	1.73913e-05	990/8318/81620/23594/4998/51053	6		C0001306	Acute alcoholic liver disease	3/178	35/21671	0.0857143	10.4355	5.08394	0.00293964	0.0258475	0.0184339	3553/355/3162	3
C3160738	FANCONI ANEMIA, COMPLEMENTATION GROUP D2	6/364	19/21671	0.315789	18.8008	10.1458	4.86093e-07	2.02431e-05	1.73913e-05	675/55215/2177/5888/7398/5111	6		C4011788	Behavioral variant of frontotemporal dementia	3/178	35/21671	0.0857143	10.4355	5.08394	0.00293964	0.0258475	0.0184339	341/348/54209	3
C0023530	Leukopenia	24/364	440/21671	0.0545455	3.2474	6.22502	4.93793e-07	2.03378e-05	1.74727e-05	675/1736/83990/2189/2175/5347/1719/7516/55215/2187/7298/3161/2177/5888/2956/2176/29089/8836/6240/11169/4171/8140/9837/55964	24		C0268398	Familial lichen amyloidosis	7/178	230/21671	0.0304348	3.70535	3.75367	0.0029844	0.0261851	0.0186747	274/3553/355/51314/348/3162/3383	7
C0266589	Congenital ear anomaly NOS (disorder)	13/364	137/21671	0.0948905	5.64937	7.13529	5.60786e-07	2.2846e-05	1.96275e-05	675/83990/2189/2175/7516/55215/2187/2177/5888/157570/2176/29089/203068	13		C0205734	Diabetes, Autoimmune	6/178	172/21671	0.0348837	4.247	3.8907	0.00302358	0.0264724	0.0188796	3553/57379/3105/567/3383/3107	6
C0042580	Vesico-Ureteral Reflux	15/364	187/21671	0.0802139	4.77559	6.77747	6.74968e-07	2.70371e-05	2.32282e-05	8318/22995/284403/348654/54892/55835/259266/55215/57082/9928/1789/5982/163786/11113/6491	15		C0917798	Cerebral Ischemia	5/178	120/21671	0.0416667	5.0728	4.07137	0.00314808	0.027504	0.0196153	3106/3553/355/6401/3383	5
C0541764	Delayed bone age	19/364	295/21671	0.0644068	3.8345	6.40684	6.78091e-07	2.70371e-05	2.32282e-05	1062/54888/990/8318/22995/55835/10293/10733/29980/10940/641/7468/81620/150468/5982/23594/56992/4998/51053	19		C0020455	Hypergammaglobulinemia	3/178	36/21671	0.0833333	10.1456	4.99777	0.0031877	0.0276155	0.0196948	355/6737/567	3
C0678230	Congenital Epicanthus	23/364	417/21671	0.0551559	3.28374	6.1548	7.08012e-07	2.79329e-05	2.39979e-05	675/83990/54888/2189/2175/7516/3070/55215/9319/3832/2146/2187/7468/2177/5888/83879/699/2176/29089/1789/5982/203068/701	23		C0151632	ESR raised	3/178	36/21671	0.0833333	10.1456	4.99777	0.0031877	0.0276155	0.0196948	340061/5696/5698	3
C0206624	Hepatoblastoma	24/364	452/21671	0.0530973	3.16119	6.06902	7.97859e-07	3.11497e-05	2.67615e-05	675/3181/5347/4176/6426/995/898/9768/890/29128/10797/2146/54443/2305/1033/8833/6502/983/1786/6240/4436/1789/5111/332	24		C0271051	Macular retinal edema	3/178	36/21671	0.0833333	10.1456	4.99777	0.0031877	0.0276155	0.0196948	3553/348/3663	3
C1840069	Sandal gap	9/364	62/21671	0.145161	8.64228	7.87627	8.92599e-07	3.44893e-05	2.96306e-05	1062/54888/22995/55835/10293/10733/2146/157570/51053	9		C3854434	Bone marrow infiltration	3/178	36/21671	0.0833333	10.1456	4.99777	0.0031877	0.0276155	0.0196948	5777/567/7852	3
C0281842	Abnormality of the fallopian tube	6/364	22/21671	0.272727	16.237	9.34569	1.28096e-06	4.84954e-05	4.16636e-05	675/83990/11200/2187/5888/580	6		C0030246	Pustulosis of Palms and Soles	4/178	74/21671	0.0540541	6.58093	4.3764	0.00323725	0.0279859	0.019959	3553/3105/348/3107	4
C3809768	IMMUNODEFICIENCY 13	6/364	22/21671	0.272727	16.237	9.34569	1.28096e-06	4.84954e-05	4.16636e-05	55215/29128/9156/2177/144455/5888	6		C1850900	Familial primary gastric lymphoma	5/178	121/21671	0.0413223	5.03088	4.04631	0.00326235	0.0281438	0.0200716	5777/5742/57379/115650/7852	5
C3642346	Luminal B Breast Carcinoma	11/364	103/21671	0.106796	6.35818	7.12443	1.29623e-06	4.85826e-05	4.17385e-05	675/7153/23492/4175/4288/2146/9833/7298/580/1789/84733	11		C3811653	Experimental Organism Basal Cell Carcinoma	10/178	437/21671	0.0228833	2.78598	3.43235	0.00339055	0.028291	0.0201766	7471/6275/3811/3553/355/5742/348/3383/3107/7852	10
C0015300	Exophthalmos	16/364	225/21671	0.0711111	4.23365	6.3728	1.43541e-06	5.32665e-05	4.57626e-05	675/83990/2189/8318/2175/7516/259266/55215/2187/7468/2177/5888/157570/150468/2176/29089	16		C0036916	Sexually Transmitted Diseases	4/178	75/21671	0.0533333	6.49318	4.3367	0.00339804	0.028291	0.0201766	3553/6737/3105/567	4
C1514428	Primary peritoneal carcinoma	8/364	49/21671	0.163265	9.72012	7.98714	1.45087e-06	5.33122e-05	4.58018e-05	675/83990/11200/3925/7298/5888/580/8140	8		C0037054	Sickle Cell Trait	4/178	75/21671	0.0533333	6.49318	4.3367	0.00339804	0.028291	0.0201766	57817/355/8542/348	4
C0004509	Azoospermia	17/364	254/21671	0.0669291	3.98467	6.25394	1.55753e-06	5.6676e-05	4.86917e-05	675/83990/2189/2175/1017/7516/10733/641/55215/2187/2177/5888/1786/2176/29089/84515/5111	17		C0079773	Lymphoma, T-Cell, Cutaneous	9/178	367/21671	0.0245232	2.98563	3.49133	0.00342138	0.028291	0.0201766	274/3553/5777/355/121355/3107/8837/7852/6362	9
C1827293	Carcinoma of urinary bladder, invasive	18/364	287/21671	0.0627178	3.73395	6.09404	1.94979e-06	6.97481e-05	5.99224e-05	220134/1063/4288/898/2146/3925/2305/6790/3161/1033/55165/6240/4691/4436/3835/1869/9212/891	18		C0010403	Cryoglobulinemia	3/178	37/21671	0.0810811	9.87139	4.91491	0.00344821	0.028291	0.0201766	3811/3105/7850	3
C4012968	Mild global developmental delay	7/364	36/21671	0.194444	11.5764	8.30098	1.95399e-06	6.97481e-05	5.99224e-05	1062/990/22995/55835/10293/10733/51053	7		C0152069	Echinococcus multilocularis infection	3/178	37/21671	0.0810811	9.87139	4.91491	0.00344821	0.028291	0.0201766	3553/6891/6890	3
C0221358	Long narrow head	13/364	154/21671	0.0844156	5.02574	6.55291	2.12283e-06	7.506e-05	6.44859e-05	675/83990/2189/2175/7516/641/55215/2187/7468/2177/5888/2176/29089	13		C0155733	Atherosclerosis of aorta	3/178	37/21671	0.0810811	9.87139	4.91491	0.00344821	0.028291	0.0201766	348/3162/1071	3
C0027672	Neoplastic Syndromes, Hereditary	10/364	88/21671	0.113636	6.76542	7.0833	2.2296e-06	7.61993e-05	6.54647e-05	675/83990/11200/5426/7516/641/2956/2176/580/4436	10		C0344724	Ostium secundum atrial septal defect	3/178	37/21671	0.0810811	9.87139	4.91491	0.00344821	0.028291	0.0201766	64805/5973/4624	3
C1405984	Absent radius	6/364	24/21671	0.25	14.8839	8.89484	2.24604e-06	7.61993e-05	6.54647e-05	2175/29980/2187/2177/157570/2176	6		C0542223	Loss of speech	3/178	37/21671	0.0810811	9.87139	4.91491	0.00344821	0.028291	0.0201766	5660/2760/54209	3
C0240538	Convex nasal ridge	9/364	69/21671	0.130435	7.76553	7.35696	2.24879e-06	7.61993e-05	6.54647e-05	1062/22995/1763/10535/55835/10293/10733/29980/7468	9		C0751964	Multiple Sclerosis, Primary Progressive	3/178	37/21671	0.0810811	9.87139	4.91491	0.00344821	0.028291	0.0201766	7471/3811/348	3
C0266294	Unilateral agenesis of kidney	9/364	69/21671	0.130435	7.76553	7.35696	2.24879e-06	7.61993e-05	6.54647e-05	22995/284403/55835/259266/57082/9928/163786/11113/6491	9		C1168198	Recurrent respiratory papillomatosis	3/178	37/21671	0.0810811	9.87139	4.91491	0.00344821	0.028291	0.0201766	3811/6890/6362	3
C1861305	TARSAL-CARPAL COALITION SYNDROME	17/364	261/21671	0.0651341	3.87781	6.11353	2.2567e-06	7.61993e-05	6.54647e-05	9787/1017/23492/57650/4288/29128/2146/3925/1678/983/1786/2956/55165/4436/1789/5111/1869	17		C1859726	ARTERIAL TORTUOSITY SYNDROME	3/178	37/21671	0.0810811	9.87139	4.91491	0.00344821	0.028291	0.0201766	1286/1285/348	3
C1306710	Facial asymmetry	11/364	109/21671	0.100917	6.00819	6.85123	2.27981e-06	7.62922e-05	6.55446e-05	675/83990/2189/2175/7516/55215/2187/2177/5888/2176/29089	11		C2895206	Autoimmune disease (systemic) NOS	3/178	37/21671	0.0810811	9.87139	4.91491	0.00344821	0.028291	0.0201766	3553/355/6737	3
C1336076	Sporadic Breast Carcinoma	14/364	184/21671	0.076087	4.52989	6.28494	2.97058e-06	9.85286e-05	8.46484e-05	675/2175/11200/1017/29128/7298/3161/2177/5888/1786/2956/580/4436/1789	14		C0023212	Left-Sided Heart Failure	5/178	123/21671	0.0406504	4.94907	3.99701	0.00349981	0.028291	0.0201766	341/3553/5742/348/3162	5
C0152423	Congenital small ears	12/364	137/21671	0.0875912	5.21481	6.46837	3.56195e-06	0.000117107	0.00010061	990/8318/5426/55835/7468/81620/25886/23594/56992/4174/4998/51053	12		C2936349	Plaque, Amyloid	5/178	123/21671	0.0406504	4.94907	3.99701	0.00349981	0.028291	0.0201766	5973/28959/348/567/54209	5
C1956147	Microlissencephaly	7/364	40/21671	0.175	10.4187	7.79299	4.11917e-06	0.000133882	0.000115021	284403/10293/10733/29980/4998/11113/701	7		C0017980	Glycosuria, Renal	2/178	11/21671	0.181818	22.1359	6.38084	0.0035144	0.028291	0.0201766	3106/3107	2
C0003466	Anus, Imperforate	12/364	139/21671	0.0863309	5.13977	6.39972	4.14362e-06	0.000133882	0.000115021	675/83990/2189/8318/2175/7516/55215/2187/2177/5888/2176/29089	12		C0153458	malignant neoplasm of head of pancreas	2/178	11/21671	0.181818	22.1359	6.38084	0.0035144	0.028291	0.0201766	2323/348	2
C3839280	High grade serous carcinoma	11/364	118/21671	0.0932203	5.54994	6.47756	4.97006e-06	0.000159212	0.000136783	675/7153/1111/11200/4085/898/3925/2305/6790/81620/51053	11		C0153459	Malignant neoplasm of body of pancreas	2/178	11/21671	0.181818	22.1359	6.38084	0.0035144	0.028291	0.0201766	2323/348	2
C0265325	Turcot syndrome (disorder)	9/364	77/21671	0.116883	6.95872	6.84622	5.68919e-06	0.000180704	0.000155247	675/11200/5426/5347/2187/7298/2956/4436/9656	9		C0153460	Malignant neoplasm of tail of pancreas	2/178	11/21671	0.181818	22.1359	6.38084	0.0035144	0.028291	0.0201766	2323/348	2
C0206687	Carcinoma, Endometrioid	15/364	223/21671	0.0672646	4.00464	5.89483	6.03746e-06	0.000190155	0.000163367	675/55635/10403/64785/5426/57650/898/890/1786/2956/4171/4436/1789/5111/891	15		C0153463	Malignant neoplasm of other specified sites of pancreas	2/178	11/21671	0.181818	22.1359	6.38084	0.0035144	0.028291	0.0201766	2323/348	2
C0030312	Pancytopenia	16/364	253/21671	0.0632411	3.7651	5.78231	6.52169e-06	0.000202454	0.000173933	675/1736/83990/2189/2175/1719/7516/10535/55215/2187/2177/5888/699/2176/29089/27235	16		C0241908	Hematuria, Benign Familial	2/178	11/21671	0.181818	22.1359	6.38084	0.0035144	0.028291	0.0201766	1286/1285	2
C4725671	High-Risk Neuroblastoma	10/364	99/21671	0.10101	6.01371	6.53507	6.53599e-06	0.000202454	0.000173933	1017/5347/9833/6790/1033/10036/5888/580/1032/332	10		C0271240	Blindness of one eye (disorder)	2/178	11/21671	0.181818	22.1359	6.38084	0.0035144	0.028291	0.0201766	3106/3105	2
C2931038	Pancreatic carcinoma, familial	7/364	43/21671	0.162791	9.69186	7.45689	6.81821e-06	0.000209464	0.000179956	675/2189/11200/1017/2956/2176/4436	7		C0272173	Myelokathexis	2/178	11/21671	0.181818	22.1359	6.38084	0.0035144	0.028291	0.0201766	2048/7852	2
C0004106	Astigmatism	12/364	148/21671	0.0810811	4.82722	6.10635	7.92491e-06	0.000241484	0.000207465	675/83990/2189/2175/7516/55215/2187/7298/2177/5888/2176/29089	12		C0342853	Sialuria	2/178	11/21671	0.181818	22.1359	6.38084	0.0035144	0.028291	0.0201766	5973/1118	2
C0014588	Epispadias	6/364	30/21671	0.2	11.9071	7.81361	9.1e-06	0.000270689	0.000232556	990/8318/81620/23594/4998/51053	6		C0546983	Post-Concussion Syndrome	2/178	11/21671	0.181818	22.1359	6.38084	0.0035144	0.028291	0.0201766	3553/348	2
C1844527	Clitoral hypoplasia	6/364	30/21671	0.2	11.9071	7.81361	9.1e-06	0.000270689	0.000232556	990/8318/81620/23594/4998/51053	6		C0563312	IgM monoclonal gammopathy of uncertain significance	2/178	11/21671	0.181818	22.1359	6.38084	0.0035144	0.028291	0.0201766	57379/7852	2
C1849295	Hypoplastic labia minora	6/364	30/21671	0.2	11.9071	7.81361	9.1e-06	0.000270689	0.000232556	990/8318/81620/23594/4998/51053	6		C0600178	External Carotid Artery Diseases	2/178	11/21671	0.181818	22.1359	6.38084	0.0035144	0.028291	0.0201766	348/3162	2
C3544205	Ovarian clear cell carcinoma	10/364	103/21671	0.0970874	5.78017	6.35588	9.32703e-06	0.000275257	0.00023648	1111/5347/898/2146/7468/6790/63967/4171/4436/8140	10		C0750986	Internal Carotid Artery Diseases	2/178	11/21671	0.181818	22.1359	6.38084	0.0035144	0.028291	0.0201766	348/3162	2
C0156394	Hypertrophy of clitoris	8/364	63/21671	0.126984	7.56009	6.81541	1.01555e-05	0.000297366	0.000255475	990/8318/10293/81620/157570/23594/4998/51053	8		C0750987	Arterial Diseases, Common Carotid	2/178	11/21671	0.181818	22.1359	6.38084	0.0035144	0.028291	0.0201766	348/3162	2
C3665347	Visual Impairment	21/364	422/21671	0.049763	2.96268	5.32176	1.06018e-05	0.000308026	0.000264633	675/7084/83990/2189/2175/7516/54892/10733/55215/5422/3832/2187/1678/2177/5888/4001/150468/2176/29089/5982/27235	21		C1274700	Postmenopausal frontal fibrosing alopecia	2/178	11/21671	0.181818	22.1359	6.38084	0.0035144	0.028291	0.0201766	3106/3105	2
C3642345	Luminal A Breast Carcinoma	12/364	153/21671	0.0784314	4.66947	5.95342	1.11246e-05	0.00032073	0.000275547	7153/1111/11200/4288/55355/25788/9833/2305/3161/9134/4436/7112	12		C1510428	Cerebral abscess	2/178	11/21671	0.181818	22.1359	6.38084	0.0035144	0.028291	0.0201766	3553/3383	2
C2717836	Steroid Sulfatase Deficiency Disease	13/364	181/21671	0.0718232	4.27605	5.78482	1.25044e-05	0.000355669	0.000305564	675/7153/1111/11200/55789/10460/4288/995/9768/1678/7298/983/4436	13		C4020705	Glomerulocystic kidney disease	2/178	11/21671	0.181818	22.1359	6.38084	0.0035144	0.028291	0.0201766	1286/1285	2
C0262655	Recurrent urinary tract infection	15/364	237/21671	0.0632911	3.76808	5.60042	1.25361e-05	0.000355669	0.000305564	675/7153/83990/2189/2175/1719/7516/10293/55215/2187/2177/5888/2176/29089/5982	15		C4255374	Frontal fibrosing alopecia	2/178	11/21671	0.181818	22.1359	6.38084	0.0035144	0.028291	0.0201766	3106/3105	2
C0043119	Werner Syndrome	11/364	130/21671	0.0846154	5.03764	6.03511	1.26211e-05	0.000355669	0.000305564	8438/1736/83990/2237/1763/84163/641/9156/2177/5888/5111	11		C0014378	Enterovirus Infections	7/178	237/21671	0.0295359	3.59591	3.65681	0.00352004	0.028291	0.0201766	3553/2048/3105/7453/567/3383/3107	7
C4721532	Lymphoma, Non-Hodgkin, Familial	22/364	462/21671	0.047619	2.83503	5.21104	1.30086e-05	0.000363852	0.000312595	8438/675/990/22974/11200/1017/5347/641/10051/25788/2146/113130/6790/7298/1786/2956/6240/993/4436/5111/1408/6491	22		C0262655	Recurrent urinary tract infection	7/178	237/21671	0.0295359	3.59591	3.65681	0.00352004	0.028291	0.0201766	57817/5453/3553/5742/3105/3383/6362	7
C0677936	Refractory cancer	13/364	184/21671	0.0706522	4.20633	5.70884	1.49102e-05	0.000413951	0.000355635	675/5347/1719/29128/10797/2146/3925/2305/6790/7298/8836/3835/9212	13		C0023530	Leukopenia	10/178	440/21671	0.0227273	2.76698	3.40772	0.00355804	0.0284788	0.0203105	2323/340061/3106/57379/64859/6401/231/3162/3383/7852	10
C0948303	Carcinoma of peritoneum	4/364	10/21671	0.4	23.8143	9.43163	1.51784e-05	0.000418298	0.00035937	675/83990/2956/580	4		C0334533	Arteriovenous hemangioma	4/178	76/21671	0.0526316	6.40775	4.29771	0.00356418	0.0284788	0.0203105	3553/2048/348/3383	4
C1704376	Uterine Corpus Carcinosarcoma	6/364	33/21671	0.181818	10.8247	7.3822	1.62679e-05	0.000445051	0.000382354	29127/5426/7516/6790/332/9212	6		C1334177	Infiltrating Cervical Carcinoma	4/178	76/21671	0.0526316	6.40775	4.29771	0.00356418	0.0284788	0.0203105	3106/3135/3107/8837	4
C0431890	Hypoplasia of thumb	7/364	49/21671	0.142857	8.5051	6.87426	1.66701e-05	0.00045275	0.000388969	2175/84823/7468/2177/157570/2176/29089	7		C0220605	Adult Non-Hodgkin Lymphoma	9/178	370/21671	0.0243243	2.96142	3.46308	0.00360871	0.0287788	0.0205245	3135/5777/355/57379/115650/567/338339/7852/5698	9
C0020255	Hydrocephalus	22/364	473/21671	0.0465116	2.7691	5.08458	1.86811e-05	0.000503717	0.000432756	29899/675/83990/54888/2189/1063/2175/10403/7516/10535/24137/55215/2187/2177/5888/157570/55143/55165/2176/29089/1869/701	22		C0497169	hiv-infection/aids	5/178	124/21671	0.0403226	4.90916	3.97276	0.00362308	0.0288374	0.0205663	3106/348/231/3107/7852	5
C0043346	Xeroderma Pigmentosum	11/364	137/21671	0.080292	4.78024	5.80145	2.07131e-05	0.000554519	0.000476401	8438/83990/10721/1111/2237/7516/9156/1678/7298/79968/5111	11		C0155877	Allergic asthma	9/178	371/21671	0.0242588	2.95344	3.45372	0.00367292	0.0291083	0.0207595	3106/6036/3553/57379/27181/1118/348/6890/6362	9
C0241391	Thumb absent	5/364	21/21671	0.238095	14.1752	7.89507	2.12092e-05	0.000563775	0.000484353	2175/55215/2187/2177/2176	5		C0220612	Childhood Non-Hodgkin Lymphoma	9/178	371/21671	0.0242588	2.95344	3.45372	0.00367292	0.0291083	0.0207595	3135/5777/355/57379/115650/567/338339/7852/5698	9
C0036631	Seminoma	17/364	311/21671	0.0546624	3.25436	5.23387	2.26829e-05	0.000598701	0.000514359	4751/675/1058/2237/1017/6790/3161/2177/9232/6502/3833/11270/4691/4436/1789/9212/1163	17		C3250443	MYOTONIC DYSTROPHY 1	6/178	179/21671	0.0335196	4.08091	3.76668	0.00367833	0.0291083	0.0207595	3106/3811/6737/5696/348/7852	6
C0566899	Small labia majora	6/364	35/21671	0.171429	10.2061	7.12428	2.31752e-05	0.00059904	0.00051465	990/8318/81620/23594/4998/51053	6		C0009088	Cluster Headache	3/178	38/21671	0.0789474	9.61162	4.83514	0.00372139	0.0292243	0.0208422	51237/6401/3383	3
C1833144	Slender long bone	6/364	35/21671	0.171429	10.2061	7.12428	2.31752e-05	0.00059904	0.00051465	990/8318/81620/23594/4998/51053	6		C0009766	Allergic Conjunctivitis	3/178	38/21671	0.0789474	9.61162	4.83514	0.00372139	0.0292243	0.0208422	7114/2048/2358	3
C3853041	Severe Congenital Microcephaly	6/364	35/21671	0.171429	10.2061	7.12428	2.31752e-05	0.00059904	0.00051465	284403/10293/10733/29980/4998/701	6		C0684256	Bacterial sepsis	3/178	38/21671	0.0789474	9.61162	4.83514	0.00372139	0.0292243	0.0208422	140691/3553/7850	3
C3469522	BREAST CANCER, SUSCEPTIBILITY TO	4/364	11/21671	0.363636	21.6494	8.95349	2.35357e-05	0.00060419	0.000519075	675/11200/54838/580	4		C1527231	Adrenomyeloneuropathy	3/178	38/21671	0.0789474	9.61162	4.83514	0.00372139	0.0292243	0.0208422	3553/3162/54209	3
C0206659	Embryonal Carcinoma	12/364	165/21671	0.0727273	4.32987	5.61188	2.37725e-05	0.000606118	0.000520731	1104/1058/11200/23492/4288/6502/1786/4691/1789/1032/5111/1163	12		C0036391	Schwartz-Jampel Syndrome	4/178	77/21671	0.0519481	6.32453	4.25943	0.00373575	0.0292255	0.020843	3106/3105/231/3107	4
C3278811	Thumb aplasia	5/364	22/21671	0.227273	13.5308	7.68585	2.70705e-05	0.000680941	0.000585013	2175/55215/2187/2177/2176	5		C2347126	Microscopic Polyarteritis	4/178	77/21671	0.0519481	6.32453	4.25943	0.00373575	0.0292255	0.020843	3811/11024/3553/11027	4
C3468041	FANCONI ANEMIA, COMPLEMENTATION GROUP C	5/364	22/21671	0.227273	13.5308	7.68585	2.70705e-05	0.000680941	0.000585013	641/55215/2187/2177/2176	5		C0242422	Parkinsonian Disorders	9/178	373/21671	0.0241287	2.9376	3.43511	0.00380402	0.0297031	0.0211837	216/3106/2512/3553/3105/348/7453/3162/54209	9
C0266470	Cerebellar Hypoplasia	14/364	226/21671	0.0619469	3.68805	5.30943	3.08713e-05	0.000771371	0.000662704	29899/1062/1736/1063/1719/259266/9319/7443/55165/9928/203068/60386/11113/701	14		C0035258	Restless Legs Syndrome	5/178	126/21671	0.0396825	4.83124	3.92502	0.00387892	0.0302306	0.0215599	57817/2512/3553/83881/3162	5
C1836543	Thick vermilion border	9/364	95/21671	0.0947368	5.64023	5.92426	3.17939e-05	0.000789162	0.000677988	990/8318/3832/81620/23594/4174/4998/11113/51053	9		C1522378	Leukemia, Large Granular Lymphocytic	4/178	78/21671	0.0512821	6.24345	4.22181	0.00391284	0.0304373	0.0217073	1844/3811/355/3804	4
C0001618	Tumors of Adrenal Cortex	8/364	74/21671	0.108108	6.43629	6.12267	3.36665e-05	0.000830144	0.000713197	9787/7153/11200/1017/9768/9133/9212/701	8		C0333307	Superficial ulcer	7/178	242/21671	0.0289256	3.52161	3.58985	0.00394539	0.0306326	0.0218466	23601/101/3106/3553/348/5008/3663	7
C0079588	Ichthyosis, X-Linked	13/364	199/21671	0.0653266	3.88927	5.35177	3.40863e-05	0.00083029	0.000713323	675/7153/1111/11200/55789/10460/4288/995/9768/1678/7298/983/4436	13		C2316212	Cryopyrin-Associated Periodic Syndromes	3/178	39/21671	0.0769231	9.36517	4.75828	0.00400741	0.0310555	0.0221482	5973/3553/5336	3
C1333991	Hereditary Non-Polyposis Colon Cancer Type 2	5/364	23/21671	0.217391	12.9425	7.48981	3.41155e-05	0.00083029	0.000713323	675/11200/9156/580/4436	5		C0018824	Heart valve disease	4/178	79/21671	0.0506329	6.16441	4.18484	0.00409553	0.0316193	0.0225503	3553/5777/6737/348	4
C0432103	Submucous cleft of hard palate	7/364	55/21671	0.127273	7.57727	6.3835	3.61231e-05	0.00087348	0.000750429	54888/990/8318/81620/23594/4998/51053	7		C4041080	Neurocognitive Disorders	4/178	79/21671	0.0506329	6.16441	4.18484	0.00409553	0.0316193	0.0225503	348/3162/3107/54209	4
C4733092	estrogen receptor-negative breast cancer	18/364	356/21671	0.0505618	3.01023	4.99859	3.67533e-05	0.000883023	0.000758627	675/3619/6241/7083/57650/11004/79733/2146/3925/2305/1894/81620/84930/2491/81930/5111/1408/1869	18		C0006444	Bursitis	2/178	12/21671	0.166667	20.2912	6.08305	0.00419458	0.031671	0.0225871	3553/5742	2
C0010606	Adenoid Cystic Carcinoma	17/364	325/21671	0.0523077	3.11418	5.0193	3.9542e-05	0.00094397	0.000810988	7153/220134/1063/2175/1017/259266/9700/29128/51514/7468/7298/6502/51659/1786/699/3835/5111	17		C0151864	Disorder of pregnancy	2/178	12/21671	0.166667	20.2912	6.08305	0.00419458	0.031671	0.0225871	3553/3133	2
C2936783	Colorectal cancer, hereditary nonpolyposis, type 1	5/364	24/21671	0.208333	12.4033	7.30559	4.25021e-05	0.00100822	0.000866183	11200/9156/2956/580/4436	5		C0221259	Trichiasis	2/178	12/21671	0.166667	20.2912	6.08305	0.00419458	0.031671	0.0225871	3106/3553	2
C0009405	Hereditary Nonpolyposis Colorectal Neoplasms	6/364	40/21671	0.15	8.93036	6.5615	5.1062e-05	0.00119613	0.00102762	11200/9156/6790/2956/580/4436	6		C0342342	Idiopathic Hypoparathyroidism	2/178	12/21671	0.166667	20.2912	6.08305	0.00419458	0.031671	0.0225871	3106/3105	2
C1857656	Prematurely aged appearance	6/364	40/21671	0.15	8.93036	6.5615	5.1062e-05	0.00119613	0.00102762	1062/22995/55835/10293/10733/5982	6		C0403440	Thin basement membrane disease	2/178	12/21671	0.166667	20.2912	6.08305	0.00419458	0.031671	0.0225871	1286/1285	2
C0280630	Uterine Carcinosarcoma	6/364	41/21671	0.146341	8.71254	6.46071	5.89762e-05	0.00137294	0.00117952	29127/5426/7516/6790/332/9212	6		C1096452	Neonatal Early-Onset Sepsis	2/178	12/21671	0.166667	20.2912	6.08305	0.00419458	0.031671	0.0225871	57817/3383	2
C1762616	Meningioma, benign, no ICD-O subtype	19/364	404/21671	0.0470297	2.79995	4.77327	5.96977e-05	0.00138115	0.00118658	675/7153/83990/1063/11200/55706/4288/1164/3832/3925/11065/2305/983/1786/27346/4436/203068/5111/891	19		C1327920	Childhood Chronic Myelogenous Leukemia, BCR-ABL1 Positive	2/178	12/21671	0.166667	20.2912	6.08305	0.00419458	0.031671	0.0225871	2048/7852	2
C0278877	Adult Meningioma	19/364	405/21671	0.0469136	2.79303	4.76093	6.16914e-05	0.00141852	0.00121869	675/7153/83990/1063/11200/55706/4288/1164/3832/3925/11065/2305/983/1786/27346/4436/203068/5111/891	19		C1519787	Undifferentiated Neuroblastoma	2/178	12/21671	0.166667	20.2912	6.08305	0.00419458	0.031671	0.0225871	3162/567	2
C3642347	Basal-Like Breast Carcinoma	14/364	245/21671	0.0571429	3.40204	4.9421	7.41695e-05	0.00169505	0.00145626	1062/675/29127/57650/4605/2146/11065/9833/2305/6790/9824/6502/1786/4436	14		C1859736	Progressive spastic quadriplegia	2/178	12/21671	0.166667	20.2912	6.08305	0.00419458	0.031671	0.0225871	5660/2760	2
C1866190	Atresia of the external auditory canal	6/364	44/21671	0.136364	8.11851	6.17783	8.8748e-05	0.00201349	0.00172984	990/8318/81620/23594/4998/51053	6		C1862596	Familial hypobetalipoproteinemia	2/178	12/21671	0.166667	20.2912	6.08305	0.00419458	0.031671	0.0225871	348/7941	2
C0206686	Adrenocortical carcinoma	15/364	281/21671	0.0533808	3.17806	4.80327	8.91783e-05	0.00201349	0.00172984	675/7153/9768/2146/3925/9833/2305/7298/1033/9232/6240/4436/5111/4172/1869	15		C3532942	Mixed dementia	2/178	12/21671	0.166667	20.2912	6.08305	0.00419458	0.031671	0.0225871	1118/348	2
C0239234	Low set ears	21/364	489/21671	0.0429448	2.55675	4.55102	9.04722e-05	0.00203048	0.00174443	990/1063/8318/5426/10535/55835/3070/29980/2187/81620/157570/83879/1789/203068/23594/3835/56992/4174/4998/51053/701	21		C4476910	Thin-cap fibroatheroma	2/178	12/21671	0.166667	20.2912	6.08305	0.00419458	0.031671	0.0225871	348/3162	2
C0009207	Cockayne Syndrome	8/364	85/21671	0.0941176	5.60336	5.55799	9.16056e-05	0.00204368	0.00175577	675/1111/2237/1719/55835/641/5888/55143	8		C0005411	Biliary Atresia	6/178	184/21671	0.0326087	3.97002	3.68189	0.00420668	0.0317042	0.0226108	57817/2048/6401/3105/3383/3663	6
C0003857	Congenital arteriovenous malformation	11/364	163/21671	0.0674847	4.01775	5.0547	0.000101752	0.00225662	0.00193871	675/83990/2189/2175/7516/55215/2187/2177/5888/2176/29089	11		C0020429	Hyperalgesia	10/178	451/21671	0.0221729	2.69949	3.31914	0.00422928	0.0318152	0.02269	64805/51237/57817/64106/3553/2048/5742/4245/231/7852	10
C0751571	Cancer of Urinary Tract	7/364	65/21671	0.107692	6.41154	5.71096	0.000107347	0.00236669	0.00203328	675/2175/11200/2146/1786/4436/8140	7		C0151811	Subcutaneous nodule	4/178	80/21671	0.05	6.08736	4.14851	0.0042839	0.0318152	0.02269	3106/355/5696/348	4
C1837463	Narrow face	8/364	87/21671	0.091954	5.47455	5.4659	0.000108044	0.00236812	0.00203451	1062/54888/22995/55835/10293/10733/641/5982	8		C1821417	RESTING HEART RATE	4/178	80/21671	0.05	6.08736	4.14851	0.0042839	0.0318152	0.02269	79690/341/1285/4624	4
C0280790	Adult Anaplastic Oligodendroglioma	5/364	29/21671	0.172414	10.2648	6.52536	0.000110835	0.00240122	0.00206295	4175/5422/3925/2956/4436	5		C2937365	Recurrent aphthous ulcer	4/178	80/21671	0.05	6.08736	4.14851	0.0042839	0.0318152	0.02269	3106/3553/355/6401	4
C1332943	Childhood Anaplastic Oligodendroglioma	5/364	29/21671	0.172414	10.2648	6.52536	0.000110835	0.00240122	0.00206295	4175/5422/3925/2956/4436	5		C0002965	Angina, Unstable	5/178	129/21671	0.0387597	4.71888	3.85527	0.00428658	0.0318152	0.02269	64805/6275/3553/3383/7852	5
C4025790	Specific learning disability	11/364	165/21671	0.0666667	3.96905	5.00378	0.000113437	0.00244345	0.00209923	990/8318/641/3832/81620/5888/150468/23594/4998/51053/27235	11		C0740447	Diabetic peripheral neuropathy	5/178	129/21671	0.0387597	4.71888	3.85527	0.00428658	0.0318152	0.02269	64805/5973/7114/3553/231	5
C0079748	Precursor cell lymphoblastic lymphoma	8/364	88/21671	0.0909091	5.41234	5.42092	0.000117134	0.00250868	0.00215527	7272/1017/81620/4171/4436/5111/8140/6491	8		C0206624	Hepatoblastoma	10/178	452/21671	0.0221239	2.69352	3.31122	0.00429495	0.0318152	0.02269	7471/57817/7114/3553/355/2048/348/231/3162/3383	10
C0334590	Anaplastic Oligodendroglioma	7/364	66/21671	0.106061	6.31439	5.65155	0.000118373	0.0025208	0.00216568	1017/4175/4288/5422/3925/2956/4436	7		C0023223	Leg Ulcer	3/178	40/21671	0.075	9.13104	4.68413	0.00430645	0.0318152	0.02269	3553/6401/3383	3
C1527349	Ductal Breast Carcinoma	12/364	196/21671	0.0612245	3.64504	4.86198	0.000126131	0.00267085	0.00229459	8438/675/4288/4085/2146/11073/3161/9232/2956/5111/1869/701	12		C0700613	Anxiety state	3/178	40/21671	0.075	9.13104	4.68413	0.00430645	0.0318152	0.02269	3553/348/7850	3
C0343641	Human papilloma virus infection	19/364	429/21671	0.044289	2.63678	4.47549	0.000131063	0.00275969	0.00237092	1111/11200/57650/4288/3925/7298/1033/983/1786/63967/10112/993/4436/54858/1789/5111/1869/701/6491	19		C3899655	Childhood Langerhans Cell Histiocytosis	3/178	40/21671	0.075	9.13104	4.68413	0.00430645	0.0318152	0.02269	3553/2048/3105	3
C1512127	HER2 gene amplification	11/364	170/21671	0.0647059	3.85231	4.8799	0.000147761	0.0030939	0.00265805	675/7153/79980/11200/10460/4288/898/1678/7298/5888/983	11		C3900100	Adult Langerhans Cell Histiocytosis	3/178	40/21671	0.075	9.13104	4.68413	0.00430645	0.0318152	0.02269	3553/2048/3105	3
C0036095	Salivary Gland Neoplasms	9/364	116/21671	0.0775862	4.61915	5.10835	0.000151577	0.00315617	0.00271154	7153/2175/259266/9700/51514/51659/2956/4436/5111	9		C0876973	Infectious Lung Disorder	6/178	185/21671	0.0324324	3.94856	3.66529	0.00431874	0.0318488	0.0227139	7471/3553/1118/348/7852/5008	6
C0281267	bilateral breast cancer	5/364	31/21671	0.16129	9.60253	6.26466	0.00015427	0.00315959	0.00271448	675/11200/348654/5888/580	5		C0001342	Acute periodontitis	5/178	130/21671	0.0384615	4.68258	3.8325	0.004429	0.0325453	0.0232106	3553/3105/3107/7850/3663	5
C1112155	Hereditary non-polyposis colorectal cancer syndrome	5/364	31/21671	0.16129	9.60253	6.26466	0.00015427	0.00315959	0.00271448	11200/9156/2956/580/4436	5		C0017612	Glaucoma, Open-Angle	5/178	130/21671	0.0384615	4.68258	3.8325	0.004429	0.0325453	0.0232106	355/6891/348/231/6890	5
C3714644	Thymus Neoplasms	5/364	31/21671	0.16129	9.60253	6.26466	0.00015427	0.00315959	0.00271448	7153/11200/7298/6240/5111	5		C3875321	Inflammatory dermatosis	9/178	382/21671	0.0235602	2.86839	3.35284	0.00444008	0.0325685	0.0232272	3553/5777/6737/348/7293/3162/3383/8837/5008	9
C0597984	Biliary stricture	4/364	17/21671	0.235294	14.0084	7.01291	0.000156711	0.00318242	0.0027341	4751/11004/2305/332	4		C1720830	Painful Bladder Syndrome	4/178	81/21671	0.0493827	6.01221	4.11279	0.00447803	0.0327884	0.0233841	3553/6401/3383/7852	4
C1842083	Abnormality of the ribs	7/364	69/21671	0.101449	6.03986	5.48043	0.000157083	0.00318242	0.0027341	990/8318/29980/81620/23594/4998/51053	7		C0920646	Ischemia of kidney	5/178	131/21671	0.0381679	4.64684	3.80996	0.00457477	0.0333189	0.0237624	3553/5777/6401/3162/3383	5
C0853879	Invasive carcinoma of breast	20/364	473/21671	0.0422833	2.51737	4.36107	0.000162981	0.00328371	0.00282112	675/9787/7153/1111/890/2146/7514/7298/2177/1894/7443/9232/51203/983/8836/4171/84733/1032/51053/701	20		C4552091	Polyarthritis, Juvenile, Rheumatoid Factor Negative	5/178	131/21671	0.0381679	4.64684	3.80996	0.00457477	0.0333189	0.0237624	1844/113/54757/7852/5008	5
C1865037	Cone-shaped epiphysis	6/364	49/21671	0.122449	7.29009	5.76137	0.000163835	0.00328371	0.00282112	1062/22995/55835/10293/10733/25886	6		C4704862	Polyarthritis, Juvenile, Rheumatoid Factor Positive	5/178	131/21671	0.0381679	4.64684	3.80996	0.00457477	0.0333189	0.0237624	1844/113/54757/7852/5008	5
C1333990	Hereditary Nonpolyposis Colorectal Cancer	11/364	174/21671	0.0632184	3.76375	4.78414	0.000181235	0.00361313	0.00310413	675/83990/11200/5426/641/9156/2956/580/4436/1789/5111	11		C0027726	Nephrotic Syndrome	9/178	384/21671	0.0234375	2.85345	3.33488	0.00459209	0.0333437	0.0237801	51237/3553/1286/1285/8542/348/567/7941/1071	9
C0677898	invasive cancer	10/364	146/21671	0.0684932	4.07779	4.87711	0.000185196	0.00367257	0.00315519	5901/675/4176/4605/1164/29128/6790/2956/4171/4436	10		C0036982	Shock, Hemorrhagic	3/178	41/21671	0.0731707	8.90833	4.61253	0.00461869	0.0333437	0.0237801	3553/3162/3383	3
C0221353	Horseshoe Kidney	6/364	51/21671	0.117647	7.0042	5.61089	0.000205136	0.00404658	0.00347652	1736/2175/55215/2177/157570/2176	6		C0272178	Drug-induced neutropenia	3/178	41/21671	0.0731707	8.90833	4.61253	0.00461869	0.0333437	0.0237801	10866/3106/6891	3
C1859778	Postnatal growth retardation	9/364	121/21671	0.0743802	4.42828	4.9427	0.000208751	0.00409229	0.00351579	83990/54888/641/157570/150468/4173/56992/9837/701	9		C1277187	Left ventricular systolic dysfunction	3/178	41/21671	0.0731707	8.90833	4.61253	0.00461869	0.0333437	0.0237801	3135/3553/348	3
C4287589	Serous Tubal Intraepithelial Carcinoma	5/364	33/21671	0.151515	9.02056	6.0266	0.000209637	0.00409229	0.00351579	675/7153/4288/898/3925	5		C1696708	Prehypertension	3/178	41/21671	0.0731707	8.90833	4.61253	0.00461869	0.0333437	0.0237801	6401/348/7852	3
C0278704	Malignant Childhood Neoplasm	11/364	179/21671	0.0614525	3.65862	4.66835	0.000231929	0.004504	0.0038695	675/83990/1111/9156/3925/6790/2956/4001/84515/4436/701	11		C0221505	Lesion of brain	6/178	188/21671	0.0319149	3.88555	3.61619	0.00466819	0.0335366	0.0239176	3553/6368/6401/348/3383/5008	6
C0039685	Tetralogy of Fallot	14/364	274/21671	0.0510949	3.04197	4.44598	0.000239205	0.00462134	0.0039703	675/83990/2189/2175/7516/55215/2187/2177/5888/1786/2176/29089/1789/5982	14		C0009763	Conjunctivitis	4/178	82/21671	0.0487805	5.93889	4.07766	0.00467801	0.0335366	0.0239176	3106/5696/115650/5698	4
C0544886	Somatic mutation	10/364	151/21671	0.0662252	3.94276	4.74287	0.000243488	0.00465609	0.00400017	8438/675/83990/11200/3161/5888/2956/699/580/701	10		C0406317	Chronic small plaque psoriasis	4/178	82/21671	0.0487805	5.93889	4.07766	0.00467801	0.0335366	0.0239176	3135/3553/355/3107	4
C3495917	Advanced breast cancer	10/364	151/21671	0.0662252	3.94276	4.74287	0.000243488	0.00465609	0.00400017	675/7153/4288/2146/3838/9833/7298/54478/6240/3149	10		C0887833	Carcinoma, Pancreatic Ductal	4/178	82/21671	0.0487805	5.93889	4.07766	0.00467801	0.0335366	0.0239176	51237/1844/3553/355	4
C0206640	Ossifying Fibroma	4/364	19/21671	0.210526	12.5338	6.57386	0.000248523	0.00472825	0.00406216	4176/2146/3161/4171	4		C0011644	Scleroderma	8/178	316/21671	0.0253165	3.08221	3.39319	0.00470985	0.0337061	0.0240386	3106/3811/3135/3553/2048/3105/3383/2358	8
C0205851	Germ cell tumor	14/364	278/21671	0.0503597	2.9982	4.38273	0.0002773	0.0052491	0.00450963	7084/55248/11200/1017/7083/4085/9319/1678/6790/9232/2956/5111/891/701	14		C1853926	NONAKA MYOPATHY	5/178	132/21671	0.0378788	4.61164	3.78764	0.00472393	0.0337482	0.0240685	5973/1844/3804/4624/3383	5
C0032339	Rothmund-Thomson syndrome	5/364	35/21671	0.142857	8.5051	5.80793	0.000278965	0.00525408	0.00451391	8318/11200/374393/641/84296	5		C0153014	Non-arthropod borne lymphocytic choriomeningitis	5/178	133/21671	0.037594	4.57696	3.76555	0.0048765	0.0339661	0.024224	2995/5699/355/5696/3105	5
C0751291	Desmoplastic Medulloblastoma	6/364	54/21671	0.111111	6.61508	5.39976	0.000282015	0.00528497	0.00454045	675/898/6502/1786/2956/4436	6		C3840565	Autoimmune thyroid disease (AITD)	5/178	133/21671	0.037594	4.57696	3.76555	0.0048765	0.0339661	0.024224	3106/6275/7253/3105/3383	5
C0085390	Li-Fraumeni Syndrome	7/364	76/21671	0.0921053	5.48355	5.11766	0.000287937	0.0053691	0.00461273	675/1111/11200/1017/1763/6502/5111	7		C0016382	Flushing	4/178	83/21671	0.0481928	5.86733	4.0431	0.0048839	0.0339661	0.024224	216/3553/5742/6401	4
C0037231	Sjogren-Larsson Syndrome	4/364	20/21671	0.2	11.9071	6.37832	0.000306558	0.00568801	0.00488671	2175/5426/132320/4436	4		C0029227	Delirium, Dementia, Amnestic, Cognitive Disorders	4/178	83/21671	0.0481928	5.86733	4.0431	0.0048839	0.0339661	0.024224	348/3162/3107/54209	4
C0302511	Small for gestational age fetus	10/364	156/21671	0.0641026	3.81639	4.61428	0.000316431	0.00584227	0.00501924	54888/2175/10293/7468/2177/2176/25886/4998/51053/701	10		C0033770	Prune Belly Syndrome	4/178	83/21671	0.0481928	5.86733	4.0431	0.0048839	0.0339661	0.024224	3553/6401/3383/7852	4
C0235782	Gallbladder Carcinoma	20/364	498/21671	0.0401606	2.39099	4.10457	0.000318785	0.00585689	0.0050318	54888/990/2237/1017/4605/29128/2146/3925/3838/2305/7298/144455/6502/1786/993/4171/4436/1032/5111/891	20		C0085632	Apathy	4/178	83/21671	0.0481928	5.86733	4.0431	0.0048839	0.0339661	0.024224	348/2760/8837/54209	4
C0266483	Pachygyria	9/364	129/21671	0.0697674	4.15365	4.69553	0.000336849	0.00615858	0.00529099	22995/284403/55835/259266/57082/9928/163786/11113/6491	9		C0001614	Adrenal Cortex Diseases	2/178	13/21671	0.153846	18.7303	5.8193	0.00493056	0.0339661	0.024224	216/3553	2
C0149978	Adenocarcinoma of rectum	8/364	103/21671	0.0776699	4.62413	4.81878	0.000348582	0.00634216	0.00544871	675/4288/11065/1678/7298/9133/10411/4436	8		C0023645	Lichen planus follicularis	2/178	13/21671	0.153846	18.7303	5.8193	0.00493056	0.0339661	0.024224	3553/23780	2
C0024304	Lymphoma, Mixed-Cell	4/364	21/21671	0.190476	11.3401	6.19621	0.000373699	0.00670154	0.00575746	8438/11200/25788/7298	4		C0149886	Seizure, Febrile, Simple	2/178	13/21671	0.153846	18.7303	5.8193	0.00493056	0.0339661	0.024224	3553/348	2
C0079757	Diffuse Mixed-Cell Lymphoma	4/364	21/21671	0.190476	11.3401	6.19621	0.000373699	0.00670154	0.00575746	8438/11200/25788/7298	4		C0340170	Complicated pneumoconiosis	2/178	13/21671	0.153846	18.7303	5.8193	0.00493056	0.0339661	0.024224	3553/3383	2
C1855650	Birth length less than 3rd percentile	4/364	21/21671	0.190476	11.3401	6.19621	0.000373699	0.00670154	0.00575746	990/81620/23594/4998	4		C0586354	Esophageal dysplasia	2/178	13/21671	0.153846	18.7303	5.8193	0.00493056	0.0339661	0.024224	3553/7852	2
C0032019	Pituitary Neoplasms	9/364	131/21671	0.0687023	4.09024	4.63686	0.000377405	0.00673578	0.00578687	7153/9700/1894/9232/9133/6502/2956/4436/5111	9		C0595905	cortex bone disorders	2/178	13/21671	0.153846	18.7303	5.8193	0.00493056	0.0339661	0.024224	216/3553	2
C0027654	Embryonal Neoplasm	6/364	57/21671	0.105263	6.26692	5.2041	0.000379869	0.00674762	0.00579705	675/10733/9319/983/891/701	6		C0700502	Acquired hypothyroidism	2/178	13/21671	0.153846	18.7303	5.8193	0.00493056	0.0339661	0.024224	7253/5698	2
C1834582	MYELOPROLIFERATIVE SYNDROME, TRANSIENT	8/364	105/21671	0.0761905	4.53605	4.74731	0.000397109	0.00702059	0.00603156	10403/2146/2305/2177/9134/983/5111/9212	8		C0856738	Triple vessel disease	2/178	13/21671	0.153846	18.7303	5.8193	0.00493056	0.0339661	0.024224	567/1071	2
C2745900	Promyelocytic leukemia	13/364	255/21671	0.0509804	3.03515	4.27285	0.000404516	0.00711797	0.00611522	2237/995/641/9768/2187/7514/983/1786/4001/4171/1032/1869/891	13		C1304140	Familial psoriasis	2/178	13/21671	0.153846	18.7303	5.8193	0.00493056	0.0339661	0.024224	3106/3107	2
C1260926	Abnormal pigmentation	6/364	58/21671	0.103448	6.15887	5.14197	0.000417785	0.00731709	0.00628629	54888/2175/9319/2177/699/701	6		C1708502	Induced cataract	2/178	13/21671	0.153846	18.7303	5.8193	0.00493056	0.0339661	0.024224	3553/231	2
C0007113	Rectal Carcinoma	19/364	472/21671	0.0402542	2.39656	4.00953	0.000435002	0.00758319	0.00651491	5901/675/5347/7516/57650/4288/641/11065/1678/7298/5888/10411/2956/699/8836/6240/4436/332/51053	19		C0016977	Gall Bladder Diseases	3/178	42/21671	0.0714286	8.69623	4.54334	0.00494428	0.0339661	0.024224	348/151306/1071	3
C0206708	Cervical Intraepithelial Neoplasia	17/364	398/21671	0.0427136	2.54298	4.06076	0.000444142	0.00770668	0.006621	5901/1058/1111/990/64946/1017/4288/4605/2305/6790/1033/699/5111/5433/4174/51053/6491	17		C0024441	Macular Holes	3/178	42/21671	0.0714286	8.69623	4.54334	0.00494428	0.0339661	0.024224	355/3105/348	3
C0079747	Low Grade Lymphoma (neoplasm)	5/364	39/21671	0.128205	7.63278	5.41875	0.000468311	0.00808861	0.00694912	8438/11200/25788/7298/6502	5		C0276226	Herpes encephalitis	3/178	42/21671	0.0714286	8.69623	4.54334	0.00494428	0.0339661	0.024224	340061/140691/348	3
C1292778	Chronic myeloproliferative disorder	16/364	366/21671	0.0437158	2.60265	4.04165	0.000505803	0.0086961	0.00747104	1062/990/1063/1763/10293/2146/2187/51514/6790/81620/5888/23594/5111/4998/51053/9212	16		C0342882	Familial hypercholesterolemia - heterozygous	3/178	42/21671	0.0714286	8.69623	4.54334	0.00494428	0.0339661	0.024224	348/7941/1071	3
C0205747	Familial Atypical Multiple Mole-Melanoma	3/364	10/21671	0.3	17.8607	6.97037	0.000516641	0.00876185	0.00752753	675/1017/2956	3		C0346421	Chronic eosinophilic leukemia	3/178	42/21671	0.0714286	8.69623	4.54334	0.00494428	0.0339661	0.024224	64805/27181/5008	3
C0279705	Thymoma, type B3	3/364	10/21671	0.3	17.8607	6.97037	0.000516641	0.00876185	0.00752753	2146/7298/8836	3		C2882221	Acute pulmonary embolism	3/178	42/21671	0.0714286	8.69623	4.54334	0.00494428	0.0339661	0.024224	3553/6401/3162	3
C1850343	Mosaic variegated aneuploidy syndrome 1	3/364	10/21671	0.3	17.8607	6.97037	0.000516641	0.00876185	0.00752753	9319/699/701	3		C3495919	Enthesitis-Related Arthritis	3/178	42/21671	0.0714286	8.69623	4.54334	0.00494428	0.0339661	0.024224	3106/3135/3553	3
C0334634	Malignant lymphoma, lymphocytic, intermediate differentiation, diffuse	14/364	296/21671	0.0472973	2.81588	4.11148	0.000520056	0.00878005	0.00754316	55872/7153/1111/22974/4288/79733/2146/7514/6790/1786/4691/4436/9212/891	14		C0005956	Bone Marrow Diseases	4/178	84/21671	0.047619	5.79749	4.00911	0.0050958	0.0348905	0.0248832	3135/348/3107/7852	4
C3160887	Node-positive breast cancer	5/364	40/21671	0.125	7.44196	5.33002	0.000527918	0.0088728	0.00762284	7272/4605/11065/983/55388	5		C0751713	Inclusion Body Myopathy, Sporadic	4/178	84/21671	0.047619	5.79749	4.00911	0.0050958	0.0348905	0.0248832	3106/3553/348/7852	4
C1609433	Congenital absence of kidneys syndrome	8/364	110/21671	0.0727273	4.32987	4.57623	0.000542807	0.00908232	0.00780285	2175/348654/2187/2177/55165/2176/9928/11113	8		C0276289	Zika Virus Infection	6/178	192/21671	0.03125	3.8046	3.55227	0.00516597	0.0353122	0.025184	340061/140691/3553/2048/3133/3162	6
C0220605	Adult Non-Hodgkin Lymphoma	16/364	370/21671	0.0432432	2.57452	3.99271	0.000568734	0.00939652	0.00807278	990/22974/11200/1017/5347/641/10051/2146/6790/7298/1786/2956/6240/4436/5111/1408	16		C0008373	Cholesteatoma	5/178	135/21671	0.037037	4.50916	3.72201	0.0051921	0.0353734	0.0252276	23601/3553/355/338339/4065	5
C0278721	Adult Lymphoblastic Lymphoma	7/364	85/21671	0.0823529	4.90294	4.71232	0.000571613	0.00939652	0.00807278	7272/1017/81620/4171/4436/8140/6491	7		C0201657	C-reactive protein measurement	5/178	135/21671	0.037037	4.50916	3.72201	0.0051921	0.0353734	0.0252276	3106/341/348/1071/54209	5
C0279525	Childhood Lymphoblastic Lymphoma	7/364	85/21671	0.0823529	4.90294	4.71232	0.000571613	0.00939652	0.00807278	7272/1017/81620/4171/4436/8140/6491	7		C0376544	Hematopoietic Neoplasms	8/178	322/21671	0.0248447	3.02477	3.33125	0.00526291	0.0357584	0.0255022	6275/51513/355/2048/51348/83881/3162/3663	8
C1857042	Sparse scalp hair	7/364	85/21671	0.0823529	4.90294	4.71232	0.000571613	0.00939652	0.00807278	1062/1736/54888/22995/55835/10293/10733	7		C0011608	Dermatitis Herpetiformis	3/178	43/21671	0.0697674	8.49399	4.47641	0.00528338	0.0357584	0.0255022	6891/6401/3383	3
C0220612	Childhood Non-Hodgkin Lymphoma	16/364	371/21671	0.0431267	2.56758	3.98057	0.000585475	0.0095407	0.00819666	990/22974/11200/1017/5347/641/10051/2146/6790/7298/1786/2956/6240/4436/5111/1408	16		C0035851	Root Resorption	3/178	43/21671	0.0697674	8.49399	4.47641	0.00528338	0.0357584	0.0255022	3553/5742/54757	3
C0279671	Cervical Squamous Cell Carcinoma	16/364	371/21671	0.0431267	2.56758	3.98057	0.000585475	0.0095407	0.00819666	116028/3148/990/4288/29128/2146/2305/6790/7298/1033/5888/1786/5933/10112/5111/4174	16		C4303092	Cystic echinococcosis	3/178	43/21671	0.0697674	8.49399	4.47641	0.00528338	0.0357584	0.0255022	3135/6891/6890	3
C0238207	Ectopic kidney	5/364	41/21671	0.121951	7.26045	5.24431	0.000593048	0.00962227	0.00826673	675/2175/1763/2177/2176	5		C0014869	Peptic Esophagitis	4/178	85/21671	0.0470588	5.72928	3.97566	0.00531377	0.0357875	0.0255229	3553/348/3162/5698	4
C0079741	Lymphoma, Intermediate-Grade	4/364	24/21671	0.166667	9.92262	5.71634	0.000637622	0.0103009	0.00884975	8438/11200/25788/7298	4		C0595936	Aqueous Humor Disorders	4/178	85/21671	0.0470588	5.72928	3.97566	0.00531377	0.0357875	0.0255229	57817/6401/3383/7852	4
C0426421	Wide nose	7/364	87/21671	0.0804598	4.79023	4.62997	0.000657664	0.0105791	0.00908875	29980/9319/3832/150468/699/3835/701	7		C0853662	Oestrogen deficiency	4/178	85/21671	0.0470588	5.72928	3.97566	0.00531377	0.0357875	0.0255229	3553/355/348/5336	4
C0020619	Hypogonadism	14/364	305/21671	0.0459016	2.73279	3.98339	0.000697663	0.011048	0.00949163	4751/675/83990/2189/2175/5426/7516/55215/5422/2187/2177/5888/2176/29089	14		C0206139	Lichen Planus, Oral	7/178	257/21671	0.0272374	3.31607	3.39907	0.00545747	0.0365901	0.0260953	7253/3811/3553/6737/6401/3383/3107	7
C0153458	malignant neoplasm of head of pancreas	3/364	11/21671	0.272727	16.237	6.60672	0.000701555	0.011048	0.00949163	2146/5888/1869	3		C0014038	Encephalitis	8/178	324/21671	0.0246914	3.0061	3.31092	0.00545789	0.0365901	0.0260953	57817/3106/3553/355/348/3162/567/3383	8
C0153459	Malignant neoplasm of body of pancreas	3/364	11/21671	0.272727	16.237	6.60672	0.000701555	0.011048	0.00949163	2146/5888/1869	3		C0279628	Adenocarcinoma Of Esophagus	10/178	468/21671	0.0213675	2.60144	3.18731	0.00545961	0.0365901	0.0260953	3553/355/2048/5742/57379/3105/3383/3107/7852/151306	10
C0153460	Malignant neoplasm of tail of pancreas	3/364	11/21671	0.272727	16.237	6.60672	0.000701555	0.011048	0.00949163	2146/5888/1869	3		C0013221	Drug toxicity	4/178	86/21671	0.0465116	5.66266	3.94274	0.00553789	0.0370544	0.0264264	3106/3162/567/3107	4
C0153463	Malignant neoplasm of other specified sites of pancreas	3/364	11/21671	0.272727	16.237	6.60672	0.000701555	0.011048	0.00949163	2146/5888/1869	3		C0345905	Intrahepatic Cholangiocarcinoma	10/178	470/21671	0.0212766	2.59037	3.17219	0.00562107	0.0374301	0.0266944	216/3106/6275/3553/2048/6891/3804/22846/3107/7852	10
C0278701	Gastric Adenocarcinoma	18/364	453/21671	0.0397351	2.36566	3.83935	0.000710496	0.011142	0.00957237	7153/9125/3181/1017/5426/4176/9700/3925/11065/3838/2305/7298/11169/993/5111/332/4174/891	18		C3714758	Juvenile psoriatic arthritis	5/178	138/21671	0.0362319	4.41113	3.65828	0.00569224	0.0374301	0.0266944	1844/113/54757/7852/5008	5
C0007112	Adenocarcinoma of prostate	15/364	342/21671	0.0438596	2.61122	3.92555	0.000726233	0.0113413	0.00974363	675/9125/87178/2175/11200/6241/4288/1678/7514/6790/7298/8570/2956/4436/5111	15		C0341439	Chronic liver disease	6/178	196/21671	0.0306122	3.72695	3.49004	0.00570165	0.0374301	0.0266944	57817/3811/3553/57379/3383/7852	6
C0024306	Lymphoma, Undifferentiated	4/364	25/21671	0.16	9.52571	5.57482	0.000749092	0.0116498	0.0100086	8438/11200/25788/7298	4		C0242339	Dyslipidemias	10/178	471/21671	0.0212314	2.58487	3.16465	0.00570319	0.0374301	0.0266944	5973/3553/3105/348/5360/3162/7941/10062/5336/1071	10
C1336735	Treatment related acute myeloid leukaemia	6/364	65/21671	0.0923077	5.4956	4.74435	0.00077277	0.0119684	0.0102823	675/7153/2187/5888/11270/4436	6		C0006105	Brain Abscess	2/178	14/21671	0.142857	17.3925	5.58341	0.0057214	0.0374301	0.0266944	3553/3383	2
C0431478	Posteriorly rotated ear	10/364	176/21671	0.0568182	3.38271	4.14837	0.000815028	0.0125709	0.0108	990/8318/5426/81620/157570/203068/23594/4998/51053/701	10		C0030489	Paraproteinemias	2/178	14/21671	0.142857	17.3925	5.58341	0.0057214	0.0374301	0.0266944	3106/567	2
C0812413	Malignant Pleural Mesothelioma	17/364	421/21671	0.04038	2.40405	3.80246	0.000831329	0.0127698	0.0109708	10403/2237/5347/1719/4085/3832/2146/3925/113130/6790/7298/8914/9493/983/1786/6240/332	17		C0085273	Erythema Infectiosum	2/178	14/21671	0.142857	17.3925	5.58341	0.0057214	0.0374301	0.0266944	3105/8542	2
C0004277	Tooth Attrition	6/364	66/21671	0.0909091	5.41234	4.69227	0.000838209	0.0128229	0.0110165	675/1736/11200/2146/2177/5888	6		C0085574	Palindromic rheumatism	2/178	14/21671	0.142857	17.3925	5.58341	0.0057214	0.0374301	0.0266944	3553/3105	2
C0220636	Malignant neoplasm of salivary gland	7/364	91/21671	0.0769231	4.57967	4.47257	0.000860452	0.0131011	0.0112555	7153/2175/259266/9700/51514/1033/51659	7		C0155164	Conjunctival scar	2/178	14/21671	0.142857	17.3925	5.58341	0.0057214	0.0374301	0.0266944	3804/3107	2
C0033300	Progeria	8/364	118/21671	0.0677966	4.03632	4.32269	0.000863386	0.0131011	0.0112555	5901/84823/6426/7514/2305/5888/4001/701	8		C0221248	Tophus	2/178	14/21671	0.142857	17.3925	5.58341	0.0057214	0.0374301	0.0266944	3106/3553	2
C4544822	Microsatellite instability-high colorectal cancer	4/364	26/21671	0.153846	9.15934	5.44104	0.000873657	0.0132035	0.0113435	1111/5426/3161/4436	4		C0233522	Inappropriate behavior	2/178	14/21671	0.142857	17.3925	5.58341	0.0057214	0.0374301	0.0266944	2760/54209	2
C4024202	Reduced number of teeth	6/364	67/21671	0.0895522	5.33156	4.64123	0.00090784	0.013665	0.0117399	1062/22995/55835/10293/10733/641	6		C0524988	Schnitzler Syndrome	2/178	14/21671	0.142857	17.3925	5.58341	0.0057214	0.0374301	0.0266944	57817/3553	2
C0012243	Digestive System Neoplasms	3/364	12/21671	0.25	14.8839	6.28786	0.000923795	0.0137086	0.0117774	3148/7298/3149	3		C1333116	Colorectal Traditional Serrated Adenoma	2/178	14/21671	0.142857	17.3925	5.58341	0.0057214	0.0374301	0.0266944	2048/84870	2
C0040820	Trematode Infections	3/364	12/21671	0.25	14.8839	6.28786	0.000923795	0.0137086	0.0117774	79801/4436/8140	3		C4749367	Mesial temporal lobe epilepsy with hippocampal sclerosis	2/178	14/21671	0.142857	17.3925	5.58341	0.0057214	0.0374301	0.0266944	3553/348	2
C3658266	Prostatic Cancer, Castration-Resistant	3/364	12/21671	0.25	14.8839	6.28786	0.000923795	0.0137086	0.0117774	55723/64105/195828	3		C0041755	Adverse reaction to drug	4/178	87/21671	0.045977	5.59757	3.91033	0.00576825	0.0375885	0.0268074	3106/3162/567/3107	4
C1865017	Thin upper lip vermilion	11/364	211/21671	0.0521327	3.10376	4.01366	0.000925366	0.0137086	0.0117774	22995/284403/55835/259266/57082/3832/9928/56992/163786/11113/6491	11		C1867743	Premature coronary artery atherosclerosis	4/178	87/21671	0.045977	5.59757	3.91033	0.00576825	0.0375885	0.0268074	100507392/6401/348/1071	4
C0027947	Neutropenia	16/364	389/21671	0.0411311	2.44877	3.76866	0.00096749	0.0142762	0.012265	675/2189/2175/5347/1719/55215/7298/3161/2177/2956/2176/6240/11169/8140/9837/55964	16		C0206708	Cervical Intraepithelial Neoplasia	9/178	398/21671	0.0226131	2.75308	3.21232	0.005773	0.0375885	0.0268074	340061/3811/3135/3553/5696/3105/6890/8837/5698	9
C0235991	Small for gestational age (disorder)	10/364	181/21671	0.0552486	3.28927	4.04237	0.00100954	0.0147725	0.0126914	54888/2175/10293/7468/2177/2176/25886/4998/51053/701	10		C0276496	Familial Alzheimer Disease (FAD)	7/178	260/21671	0.0269231	3.27781	3.36261	0.00580586	0.0377427	0.0269173	274/341/3553/348/3162/5336/54209	7
[truncated: 1,538 more rows]
[truncated: 13 more columns]

## Sheet: Her2
DisGeNET																										HDO
Her2-ceRM1													Her2-ceRM2													Her2-ceRM1													Her2-ceRM2
[truncated: 720 more rows]
[truncated: 13 more columns]

## Sheet: LumB
DisGeNET																										HDO
[truncated: 183 more rows]
[truncated: 13 more columns]

## Sheet: Basal
DisGeNET																										HDO
[truncated: 1,122 more rows]
[truncated: 13 more columns]
