# Supplementary material for: Scene: Inferring subtype-specific ceRNA modules in breast cancer
Source: Research Square preprint supplement (doi:10.21203/rs.3.rs-7181552/v1), 2025-07-23
Supplement: Supplementary file 3 [file af982a3e22cae5a12aeb709e.xlsx]

## Sheet: Sheet1
aDC	B cells	CD8 T cells	Cytotoxic cell	Dendritic cell (DC)	Eosinophils	Immature dendritic cell (iDC)	Macrophages	Mast cell	Neutrophils	NK CD56bright cells	NK CD56dim cells	NK cells	pDC	T cells	T helper cells	Tcm	Tem	TFH	Tgd	Th1	Th17	Th2	Treg
BIRC3	CD3D	CD3E	CTSW	CCR7	THBS1	ABCG2	EMP1	Mast cell tryptase	CD93	CD253	CD147	CD3	SPIB	CD127	CD4	CCR7	CCR7	STK39	FEZ1	STAT1	STAT3	IL13	CD25
CCL22	CD7	CD8A	GNLY	CLEC10A	THBS1	BLVRB	SCARB2	TPSAB1	CD93	CD55	CD298	CD3D	TCL1A	CD28	Leu8	CD27	CD27	PTPN13	C1orf61	STAT4	FOXP3	STAT5A	CD4
CCL1	CD20	CD8B	GZMA	LAMP3	SIAH1	CD1A	RAI14	CMA1	MME	CD62L	CD57	CD7	ALOX5AP	CD7	CD3D	CD45RA	CD45RA	CHGB	CD160	TBX21	IL17RA	STAT6	FOXP3
EBI3	BANK1	PD-1	GZMB	HPGD	TGIF1	CD1B	CTSK	CTSG	MME	CD82	CD58	CD107A	APP	CD3Z	CD40LG	CD45RO	CD45RO	TOX	TRD@	TNF	RORC	GATA-3	CD3D
INDO	BLNK	ABT1	GZMH	IL5RA	HES1	CD1C	APOE	TPSD1	CSF3R	NKG2A	CX3CR1	CD11B	C10orf118	CD3ÃŽÂµ	CD52	CD127	KLRG1	CDK5R1		ZEB2	IL17A	IL4	IL32
LAMP3	CD22	AES	KLRB1	MS4A3	HES1	CD1E	CD163	SLC18A2	FCGR3B	DUSP4	CXCR1	CD137	CYB561A3	CD3gama	IL32	CD4	PTGER2	CXCL13		TBX-21	DHFR	GZMA	TNFRSF18
OAS3	FCRL1	APBA2	KLRD1	CCL17	KBTBD11	CH25H	FDX1	CPA33	KIAA0329	PLA2G6	HLA-E	CD14	GAPT	CD69	IL7R	CD8	SELL	PVALB		APBB2	SNRPD1	MAF	TRAC
	JCHAIN	ARHGAP8	KLRK1	HLA-DPB1	THBS4	CLEC10A	SCG5	FCER1G	FPR1	RRAD	GTF3C1	CD19	HIGD1A	CTLA4	TRAC	CD95	TCF7	BLR1		APOD	GSTA4	ADCY1	ABI2
	PAX5	C12orf47	NKG7	HLA-DQB1	KCNH2	CSF1R	CYBB	ABCC4	BST1	FOXJ1	KIR2DL3	CD25	IDH3A	LAG3	TRBC2	AQP3	HLA-DR	MAF		ATP9A	SMAD2	AHI1	ACOT9
	B220	C19orf6	PRF1	MHCII	ABHD2	CTNS	ME1	CEACAM8	S100A12	XCL1	KIR2DS5	CD27	IGJ	PD1	UBE2L3	ATM	T-BET	PDCD1		BST2	MB	ANK1	ACP5
	BP1	C4orf15	APBA2	HLA-DQA2	RNASE2	F13A1	GPC4	ELA2	SLC22A4	MPPED1	GZMB	CD40L	LAMP5	PDCD1	ANP32B	CASP8	AKT3	ICA1		BTG3	CDC7	BIRC5	ACSL4
	CD10	CAMLG	APOL3	IRF4	CLC	FABP4	GPC4	LOC339524	TNFRSF10C	MUC3B	KIR3DS1	CD45	LRRC26	TIGIT	NAP1L4	CDC14A	C7orf54	C18orf1		CD38	WDHD1	CDC25C	ACTA2
	CD40	CDKN2AIP	DUSP2	C1QA	GPR44	FZD2	KAL1	LOH11CR2A	CYP4F3	BG255923	KIR2DS2	CD57	LTB	CCR5	RPA1	CEP68	CCR2	MYO7A		CD70	CDC25C	CDC7	ACTR3C
	CD43	DNAJB1	KLRF1	CD54	EMR1	GSTT1	SULT1C2	MA4A2	MGAM	NIBP	KIR3DL1	CD62L	MAP1A	CD103	SEC24C	CG030	CXCR3	MAF		CMAH	PMCH	CENPF	ADAM10
	CD70	FLT3LG	RORA	CSF1R	IGSF2	GUCA1A	MARCO	MPO	IL8RB	MADD	FLJ20699	CD69	NUCB2	CD137	ITM2A	CLUAP1	DDX17	C18orf1		CSF2	CXCR6	CXCR6	ADAT2
	CD80	GADD45A	RUNX3	S100	SYNJ1	HS3ST2	CCL7	NM_003293	IL8RA		KIR2DS1	CD8	OFD1	CD2	SLC25A12	CREBZF	EWSR1	TSHR		CTLA4	LAIR2	DHFR	ADCY3
	CD86	GZMM	SIGIRR	CLEC7A	CCR3	LMAN2L	CHIT1	NR0B1	FCAR		KIR3DL3	CISPLATIN	PLD4	CD247	ASF1A	CYLD	FLI1	ST8SIA1		DGKI	PTGIS	EVI5	ADI1
	HLA-DR	KLF9	ZBTB16	CLIC2	HIST1H1C	MMP12	MSR1	PGDS	CEACAM3		TMEPAI	FCGR3A	PPP1R14B	CD39	ATF2	CYorf15B	GDPD5	MYO6		DOK5	ANK1	GSTA4	ADORA2A
	IGHG1	LEPROTL1		WFDC21P	KCNH2	MS4A6A	CHI3L1	PPM1H	LILRB2		EDG8	granzymes	PTCRA	CXCR6	BATF	DOCK9	LTK	ICA1		DPP4	CENPF	HELLS	ADPRH
	IGHG2	LIME1		DUSP4	IL5RA	NM_021941	CD84	PRG2	FPRL1		IL21R	GZMA	PTGDS	GZMA	GOLGA8A	FYB	MEFV	SMAD1		DUSP5	GATA3	IL26	AFTPH
	IgM	MYST3		HLA-DQ	IL5RA	NUDT9	SULT1C2	SCG2	FPRL1			IFN-G	PTPRS	BCL11B	ICOS	HNRPH1	NFATC4	CHI3L2		EGFL6	EVI5	LAIR2	AKAP5
	ZCCHC7	PF4		CD21	GALC	PPARG	PTGDS	SIGLEC6	CEACAM3			IL2RB	SCT	CAMK4	CD28	KLF12	PRKY	PASK		HBEGF	BIRC5	LIMA1	AKIP1
	AL713998.1	PPP1R2		CD38	CAT	PREP	MSR1	SLC24A3	TNFRSF10C			KIR2DL1-2DS1	SEC61B	LAT	FRYL	MAP3K1	RUNX3	HIST1H4K		IL12RB2	PHEX	MB	AKIRIN2
	ARPP21	PRF1		RGS1	TIPARP	RAP1GAP	PTGDS	MAOB	FCAR			KIR2DL2-2DL3CD127	SLC15A4	LINC02446	PPP2R5C	MLL	TBC1D5	BLR1		IL22	SLC39A14	MICAL2	ALDH3A2
	BLK	PRR5		CCL13	SYNJ1	SLC7A8	SGMS1	KIT	KCNJ15			KIR2DL5	SMPD3	NELL2	FUSIP1	NEFL	TBCD	PASK		LRP8	MICAL2	NEIL3	ANKRD10
	IGL	RBM3		HSD11B1	TKTL1	SYT17	BCAT1	PTGS1	FCAR			KIR3DL1	SPCS1	RCAN3	LRBA	NFATC3	TRA	MKL2		LRRN3	ADCY1	PHEX	APLP2
	RPS4Y2	SF1		NPR1	LRP5L	TACSTD2	BCAT1	CALB2	G0S2			KLRD1	TRAF4	TRABD2A	FAM111A	PCM1	VIL2	POMT1		LTA	LIMA1	PMCH	ARHGAP9
	TCL18	SFRS7		PPFIBP2	RRP12	TM7SF4	FN1	CPA3	ALPL			KLRF1	TSPAN13	TRAT1	NUP107	PCNX	TRA@	MAGEH1		SGCB	NEIL3	PTGIS	ARHGEF12
	TERF2	SLC16A7		DC-SIGN	TKTL1	VASH1	MSR1	ADCYAP1	SLC25A37			KLRK1	UGCG	BST2	PHF10	PHC3		HEY1		SYNGR3	HELLS	SLC39A14	ARID5B
	HLA-DQA1	TBCC		MRC1	RCOR3		CXCL5	TAL1	FLJ11151			KNG2A	IL3RA	CD52	C13orf34	POLR2J2		SH3TC1		ZBTB32	AHI1	SMAD2	ARPC1A
	IKZF3	THUMPD1		CD56	SMPD3		CD163	HDC	DYSF			KNG2D		IL32	DDX50	REPS1		B3GAT1		CCL4	IL26	SNRPD1	ARPC1B
	NUGGC	TMC6		CD209	CYSLTR2		GM2A	TPSB2	HPSE			KR2DS4		RPL28		RPP38		KCNK5		IFNG		WDHD1	ARPP19
	IGLL1	TSC22D3		CCL22	HRH4		ATG7	MS4A2	SIGLEC5			LAG3		RPS12		SLC7A6		THADA				AKT	ASB2
	IGLL5	VAMP2			ACACB		PCOLCE2	GATA2	VNN3			MIPLA		RPS15A		STX16		SIRPG				CD31	ASXL2
	LAPTM5	ZEB1			C9orf156		MS4A4A	HPGD	CRISPLD2			NKG2C		41BB		TIMM8A		SLC7A10				CXCL12	ATOX1
	PTPRC	ZFP36L2			ACACB		CLEC5A	MLPH				NKG2D		CCL5		TRAF3IP3		KIAA1324				CXCR4	ATP13A3
	SSR4	ZNF22			ACACB		DNASE2B					NKP30		CFD		TXK		MYO7A				ERK	ATP1B1
	TMP1	ZNF609			MYO15B		COLEC12					NKP44		ICOC		USP9Y		HEY1				PD-L1	ATP6V0A1
	VIM	ZNF91					COL8A2					NKP80		IFIT1				THADA				GATA3	ATP6V1C2
	IgA											PD-1		LAPTM5				ZNF764					BACH1
	ABCB4											PDL1-PDL2		VIM									BATF
	ACSM3											perforin		CD3delta									BEX3
	AFF3											TIM-3		KLRD1									BRE
	AFF4											TNF		TNFRSF18									BRE-AS1
	AIDA											ZNF683		CD134									BST2
	ANKRD13A											KLRB1		Vista									BTG3
	ANKRD44											TBX21		CCR8									C15orf53
	AP1S3											CASP5		CD177									C16orf87
	ARHGAP24											CLIC3		LAYN									C21orf91
	ARID5B											GSG1		MAGEH1									C3AR1
	ATP2B1											L1TD1		TNFRSF4									C5orf45
	BCAS4											NMUR1		CD5A									C7orf25
	BCL7A											PRF1		CO3D									C9orf16
	BEND5											PTGDR		FOPX3									CACYBP
	BIRC3											TP53TG5		HLA-E									CADM1
	BTLA											MXRA8		IFNa									CALM3
	C16orf74											CCR7		IFNgama									CARD16
	C17orf67											KIR2DL4		MO57									CARD17
	C1orf132											KIR3DL2		MYC									CASP1
	CBFA2T3											KIR3DL3		NGK7									CBX5
	CCDC191											CD69a		CD30									CCDC22
	CCR6											PTPRC		CD96									CCDC50
	CCSER1											HLA-E		CIITA									CCND2
	CD200											NGK7		CXCL10									CCNG2
	CD55											CCR4		CXCL13									CCR1
	CD83											CR2		GNLY									CD177
	CDCA7L											CXCR1		HLA-DRA									CD27
	CEPT1											HOPX		IDO1									CD27-AS1
	CERS4											IFITM3		RPF1									CD58
	CHD7											KLRB1,		STAT1									CD59
	COBLL1											CD8B		TAGAP									CD7
	COL19A1											FLT3LG		THEMIS									CD70
	COL4A4											IL15		TNFRSF17									CD74
	COL9A3											ADARB1		ALK									CD79B
	CPNE5											AF107846		GRB									CD80
	CSNK1G3											AL080130		INF gama									CD82
	CTD-3184A7.4											ALDH1B1		PRF									CD83
	CXCR5											BCL2		TBET									CDIP1
	CXXC5											CDC5L		TCR a									CDKN1A
	CYB561A3											FGF18		TCR delta									CDKN2A
	CYFIP2											FUT5		TCR gama									CEACAM1
	DAPP1											FZR1		ENTPD1									CKAP2
	DHTKD1											IGFBP5		ITGAE									CLEC7A
	DRAM2											LDB3		LMO1									CLIP1
	EAF2											MAPRE3		LMO2									CLNK
	EBLN3											MCM3AP		TAL1									CMTM6
	EEF1B2											MRC2		TAL2									COG1
	EEF2											NM_014274		USP7									COL9A2
	ERP29											NM_017616		KLRF1									COMMD3
	FAM129C											PDLIM4		CCL4									COPZ1
	FAM177B											PRX		CXCR4									CORO1B
	FAM65B											PSMD4		HHLA2									COX5A
	FCMR											SLC30A5		LAG-3									CREB3L2
	FCRL2											TBXA2R		SH2D1A									CREM
	FCRL5											TCTN2		TIM-3									CSF1
	GABPB1-AS1											TINAGL1		Klrb1c									CSF2RB
	GALNTL6											ZNF205		ITM2A									CTNNA1
	GLRA3											ZNF528		KLRB1									CTNNB1
	GLTSCR2											ZNF747		NCALD									CTSA
	GNB5											DNAM-1		TRA									CTSC
	GNG7											hCD56		CD1									CTSD
	GPM6A											IOT-10		CD20									CTTNBP2NL
	GPR18											XCL1		CD43									CXCR3
	GPR183											NCR1		PHLDA1									CXCR6
	HHEX													SNAP47									CYTOR
	HIP1R													Terminal deoxynucleotidyltransferase									DDB2
	HLA-DMA													LCK									DDIT4
	HLA-DMB													CD3E									DDX24
	HLA-DPA1													SKAP1									DNPH1
	HLA-DQB1													CD3G									DPYSL2
	HLA-DRB1													TRA@									DUSP10
	HLA-DRB5													PRKCQ									DUSP16
	HRK													TRBC1									DUSP4
	HSH2D													CD3D									DYNC1I2
	HVCN1													CD6									DYNLL1
	ID3																						DYNLRB1
	IFT57																						EBI3
	IGHE																						ECH1
	IGHV3-23																						EDARADD
	IGKV1-12																						EIF4H
	IGLC7																						ENO1
	IL12A																						ENTPD1
	INPP5D																						ENTPD1-AS1
	INTU																						EPSTI1
	IRF8																						ERI1
	ISG20																						ETV7
	JADE3																						FAM104A
	KHDRBS2																						FAM53B
	KLF2																						FANCL
	LCN8																						FAS
	LTB																						FBLN7
	LY9																						FKBP1A
	LYN																						FKBP1A-SDCBP2
	Mar1																						FMNL3
	MARCKSL1																						FOXO1
	MDS2																						FYCO1
	MEF2C																						GABARAP
	MFN1																						GABARAPL1
	MGAT5																						GABPB1
	MICAL3																						GADD45A
	MTRNR2L8																						GADD45G
	MTSS1																						GALM
	MYC																						GAPDH
	NCF1																						GATA3
	NFKBID																						GBP2
	NPM1																						GBP4
	NT5E																						GBP5
	NUAK2																						GCNT1
	OAZ1																						GK
	ODC1																						GOLGA8A
	ORAI2																						GOLGA8B
	OSBPL10																						GOT2
	OSBPL10-AS1																						GPI
	P2RX5																						GPX1
	P2RX5-TAX1BP3																						GRAMD3
	PARP1																						GRINA
	PARP15																						GRN
	PAWR																						GSTO1
	PCDH9																						GTF3C6
	PDLIM1																						HACD1
	PEG10																						HADHA
	PHACTR1																						HADHB
	PKHD1L1																						HAVCR2
	PKIG																						HDAC7
	PLAC8																						HERPUD1
	PLEKHF2																						HLA-DMA
	PLEKHG7																						HLA-DQA1
	PNOC																						HNRNPLL
	POU2AF1																						HPRT1
	POU2F2																						HPSE
	PPM1K																						HSD17B10
	PRCD																						HSPA1A
	PRDM2																						HSPA1B
	PRDM4																						HSPB1
	PRKCB																						HTATIP2
	PTPRK																						ICA1
	QRSL1																						ICAM3
	RAB30																						ICOS
	RALGPS2																						IFI6
	RASGRP2																						IFNAR2
	RASGRP3																						IGFLR1
	RASSF6																						IKZF4
	RCSD1																						IL10RB
	RHOBTB2																						IL12RB1
	RIC3																						IL12RB2
	RNASE6																						IL1R1
	RNASET2																						IL1R2
	RPL22																						IL21R
	RPL22L1																						IL21R-AS1
	RPS11																						IL2RB
	RPS13																						INPP1
	RRAS2																						INPP5F
	SAV1																						IRF4
	SC5D																						IRF5
	SCIMP																						IRF9
	SEMA4B																						ISG15
	SETBP1																						ISOC1
	SHISA8																						KAT2B
	SIDT1																						KCNN4
	SIDT2																						KDM5B
	SMARCB1																						KIF20B
	SMC6																						KIF5B
	SMIM14																						LAIR2
	SNHG7																						LAP3
	SNHG8																						LAPTM4A
	SNN																						LAPTM4B
	SNX2																						LASP1
	SNX22																						LAT2
	SNX29																						LAYN
	SOBP																						LDLRAD4
	SP110																						LEPROT
	SP140																						LGALS3
	SSPN																						LINC00963
	ST6GAL1																						LMBRD1
	STAG3																						LMCD1
	STAP1																						LOC389831
	STEAP1B																						LRPAP1
	STRBP																						LRRC61
	STX7																						LTA
	SYPL1																						LY75
	TAGAP																						LY75-CD302
	TCOF1																						LYST
	TFEB																						MAF
	TIPIN																						MAGEH1
	TLE1																						MAN1A2
	TLR10																						MAP1LC3A
	TMEM154																						MAP2K3
	TMEM243																						MAPKAPK3
	TPD52																						MAST4
	TSPAN13																						MBOAT7
	UGT8																						MCCC2
	UVRAG																						MCL1
	ZBED5																						MCM5
	ZDHHC21																						METTL8
	ZNF107																						MGAT1
	ZNF296																						MICAL2
	ZNF532																						MIIP
	ZNF860																						MIR4435-2HG
	ZNF90																						MIR4632
	IGH1																						MIR497HG
	MA4A1																						MRPS6
	ADNP																						MX1
	ARID1A																						MYO1E
	CCND3																						MYO5A
	E2F2																						MYO5C
	FBXO11																						MZB1
	FOXO1																						NAB1
	GNA13																						NAMPT
	GNAI2																						NAPA
	HNRNDP																						NBR1
	PCBP1																						NCF4
	RFX7																						NCOA3
	RHOA																						NDFIP2
	SMARCA4																						NDUFA13
	TFAP4																						NDUFC2
	TP53																						NDUFC2-KCTD14
	BLA36																						NEDD9
	LAG3																						NFAT5
	VCAM1																						NINJ1
	CCR9																						NINJ2
	DTNB																						NME3
	FAM30A																						NPC2
	IGL@																						NPTN
	J-chain																						NSF
	SCN3A																						NUDT5
	SLC15A2																						OAS1
	BCL2A1																						OAS3
	CD102																						OCIAD2
	CD157																						OS9
	CD18																						OTUD5
	CD217																						P2RY10
	CD305																						PAIP2
	CD31																						PAK2
	CD317																						PARK7
	CD63																						PCK2
	CD97																						PDE4A
	hCD19																						PDIA6
	GLDC																						PELI1
	COCH																						PGK1
	CR2																						PHACTR2
	HLA-DOB																						PHLDA1
	SPIB																						PHPT1
	CD19																						PHTF2
	KIAA0125																						PIM2
	TNFRSF17																						PIM3
	IGHM																						PKM
	TCL1A																						PLEKHG2
	BCL11A																						PLTP
	MS4A1																						PMAIP1
	IGHA1																						POU2F2
	IGKC																						PPM1G
	CD72																						PPP1CB
	BACH2																						PRDM1
																							PRDX1
																							PRDX3
																							PRDX5
																							PRKAR1A
																							PRNP
																							PSEN1
																							PSMA2
																							PSMB1
																							PSMB3
																							PSMB6
																							PSMC2
																							PSMD11
																							PTP4A3
																							PTPRJ
																							PTTG1
																							RAB11FIP1
																							RAP1A
																							RBPJ
																							RCBTB1
																							RFX5
																							RGS1
																							RHBDD2
																							RHOC
																							RNF187
																							RPS27L
																							SAMSN1
																							SAT1
																							SCO2
																							SDC4
																							SDF4
																							SEC14L1
																							SEC61A2
																							SERPINB9
																							SERPINE2
																							SFT2D1
																							SGMS1
																							SGPP1
																							SGSH
																							SH2D2A
																							SH3BGRL
																							SIRPG
																							SLA
																							SLAMF1
																							SLC12A6
																							SLC16A1
																							SLC25A38
																							SLC35F2
																							SLC3A2
																							SLC41A1
																							SLC5A3
																							SMC4
																							SMPD3
																							SMS
																							SNX9
																							SOX4
																							SPATS2L
																							SPOCK2
																							SQSTM1
																							SRA1
																							SSH1
																							STAMBPL1
																							STARD7
																							SUMO1
																							SUOX
																							SURF4
																							SYNGR2
																							TBC1D8
																							TET2
																							TFRC
																							THADA
																							TLK1
																							TM9SF2
																							TMEM154
																							TMX1
																							TNFAIP3
																							TNFRSF13B
																							TNFRSF1B
																							TNFRSF4
																							TNFRSF8
																							TNFRSF9
																							TNIP1
																							TNIP3
																							TNS3
																							TOM1
																							TOX
																							TOX2
																							TP53INP1
																							TPI1
																							TPMT
																							TPP1
																							TRAF1
																							TRAF3
																							TRIM69
																							TRPS1
																							TSPAN13
																							TSPYL2
																							TTYH3
																							TULP4
																							TYMP
																							UBE2L6
																							UBE2N
																							UCP2
																							UGP2
																							USP48
																							UXS1
																							VAV3
																							VCP
																							VDR
																							VEZT
																							VMP1
																							VPS54
																							WDFY1
																							WDR83OS
																							WHRN
																							WSB1
																							YJEFN3
																							ZBED2
																							ZBTB32
																							ZC2HC1A
																							ZC3H12D
																							ZC3H7A
																							ZFP36L1
																							ZNF280C
																							ZNF292
																							CTLA-4
																							STAT3
																							CD2
																							CD3E
																							CD3G
																							PDCD1
																							RNF19A
																							ADA
																							CD26
